# Supplementary material for: Genome Structure of the Legume, Lotus japonicus
Source: PubMed Central journal article supplement — DNA Res. 2008 May 28;15(4):227–39. doi: 10.1093/dnares/dsn008 (PMC2575887; doi:10.1093/dnares/dsn008), 2008-05-28
Supplement: dsn008_1.pdf [file dsn008_1.pdf]

## Supplemental Figures

Supplemental Figure 1. Ratio of repetitive sequences in SGA and TAC/BAC end sequences.

The ratios of the centromeric repeat sequence (LjRE2), heterochromatic repeat sequence (LjTR1) and interspersed repeat (LjRE1) in SGA sequences (blue) and TAC/BAC end sequences (red) were plotted.

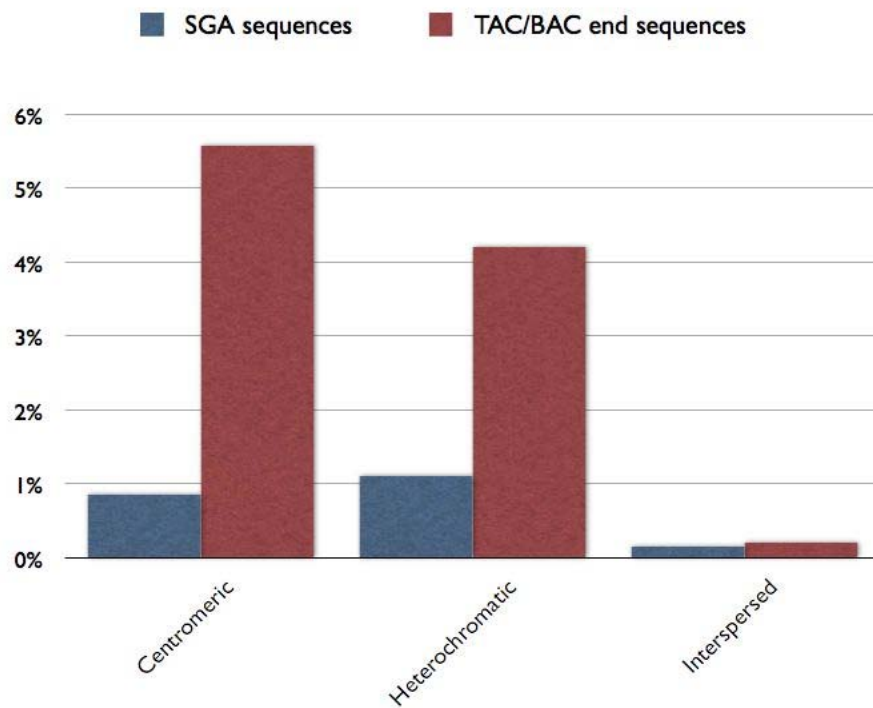

Supplemental Figure 2. FISH images of repetitive sequences on pachytene chromosomes of *L. japonicus*. **A**; LjRE1 (red) exists throughout the entire *L. japonicus* genome. **B**; LjRE2 (red) was detected in the centromeric region. **C**; LiTR1 (green) was detected on major heterochromatin blocks. **D**; LjTR4 (green) was detected in subteromeric regions. Bar represents 5  $\mu\text{m}$ .

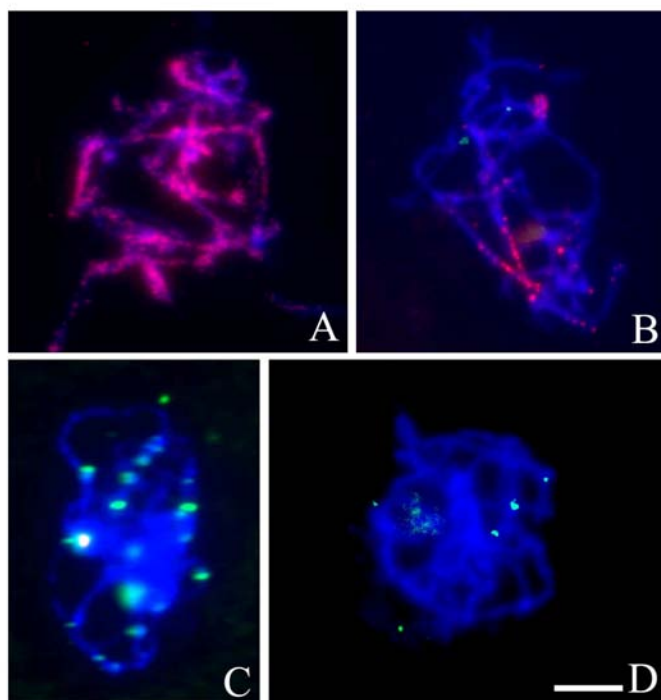

| <b>Supplemental Table 1. List of sequenced TAC and BAC clones.</b> |             |     |                   |             |            |       |                     |                 |                  |
|--------------------------------------------------------------------|-------------|-----|-------------------|-------------|------------|-------|---------------------|-----------------|------------------|
| marker                                                             | marker type | chr | map position (cM) | contig name | clone name | phase | sequence redundancy | clone selection | Accession number |
|                                                                    |             |     | 0.0               | CM0088      | LjT12M01   | 1     | x3                  | seed            | DF093247         |
| TM0088                                                             | SSR         | 1   | 0.0               | CM0088      | LjT15K21   | 1     | x5                  | seed            | DF093247         |
|                                                                    |             | 1   |                   | CM0088      | LjB26M21   | 1     | x3                  | walking         | DF093247         |
| TM0224                                                             | dCAPS       | 1   | 0.0               | CM0088      | LjT13A11   | 3     | x5                  | seed            | DF093247         |
| TM0358                                                             | SSR         | 1   | 0.0               | CM0088      | LjT48G05   | 3     | x5                  | seed            | DF093247         |
|                                                                    |             | 1   |                   | CM0591      | LjT21K10   | 1     | x5                  | seed            | DF093453         |
| TM0771                                                             | SSR         | 1   | 0.0               | CM0591      | LjT13P11   | 1     | x3                  | seed            | DF093453         |
| TM0591                                                             | SSR         | 1   | 0.0               | CM0591      | LjT01F11   | 1     | x5                  | seed            | DF093453         |
| TM1473                                                             | SSR         | 1   | 0.0               | CM0591      | LjT39D07   | 1     | x3                  | seed            | DF093453         |
| TM1049                                                             | SSR         | 1   | 0.0               | CM0289      | LjT39O15   | 1     | x3                  | seed            | DF093367         |
| TM0289                                                             | SSR         | 1   | 0.0               | CM0289      | LjT16P18   | 3     | x5                  | seed            | DF093367         |
|                                                                    |             | 1   |                   | CM0289      | LjT45I09   | 1     | x3                  | seed            | DF093367         |
| TM0145                                                             | SSR         | 1   | 0.0               | CM0145      | LjT43O24   | 3     | x5                  | seed            | DF093289         |
|                                                                    |             | 1   |                   | CM0145      | LjT62O12   | 1     | x3                  | walking         | DF093289         |
|                                                                    |             | 1   |                   | CM0016      | LjT02L12   | 1     | x3                  | walking         | DF093190         |
| TM0016                                                             | SSR         | 1   | 0.0               | CM0016      | LjT13O04   | 3     | x5                  | seed            | DF093190         |
| TM0189                                                             | SSR         | 1   | 0.0               |             | LjT10H09   | 3     | x5                  | seed            | AP009657         |
| TM0078                                                             | SSR         | 1   | 0.0               | CM0078      | LjT18O13   | 3     | x5                  | seed            | DF093241         |
|                                                                    |             | 1   |                   | CM0078      | LjT46D24   | 3     | x3                  | walking         | DF093241         |
|                                                                    |             | 1   |                   | CM0078      | LjT24A17   | 3     | x5                  | walking         | DF093241         |
|                                                                    |             | 1   |                   | CM0078      | LjB03H14   | 3     | x5                  | walking         | DF093241         |

|        |       |   |     |        |           |   |    |         |          |
|--------|-------|---|-----|--------|-----------|---|----|---------|----------|
|        |       | 1 |     | CM0171 | LjB26G22  | 3 | x5 | walking | DF093305 |
|        |       | 1 |     | CM0171 | LjT40A22  | 3 | x5 | walking | DF093305 |
|        |       | 1 |     | CM0171 | LjB18I12  | 3 | x5 | walking | DF093305 |
| TM1792 | SSR   | 1 | 0.0 | CM0171 | LjT14A18  | 3 | x5 | walking | DF093305 |
| TM0171 | SSR   | 1 | 0.0 | CM0171 | LjT31H17  | 3 | x5 | seed    | DF093305 |
|        |       | 1 |     | CM0171 | LjB13J20  | 1 | x3 | walking | DF093305 |
|        |       | 1 |     | CM0171 | LjB03E14  | 1 | x3 | walking | DF093305 |
|        |       | 1 |     | CM1785 | LjT15F15  | 3 | x5 | walking | DF093527 |
|        |       | 1 |     | CM1785 | LjT09P16  | 3 | x5 | walking | DF093527 |
| TM0166 | SSR   | 1 | 0.0 | CM0166 | LjT47G03  | 3 | x5 | seed    | DF093302 |
| BM1741 | SSR   | 1 | 0.0 | CM0166 | LjB05K22  | 3 | x5 | walking | DF093302 |
|        |       | 1 |     | CM0166 | LjB18D01  | 3 | x5 | walking | DF093302 |
|        |       | 1 |     | CM0166 | LjB359B10 | 2 | x5 | walking | DF093302 |
|        |       | 1 |     | CM1956 | LjT29F22  | 2 | x5 | walking | DF093535 |
|        |       | 1 |     | CM1956 | LjB20A06  | 3 | x5 | walking | DF093535 |
| BM2032 | SSR   | 1 | 0.0 | CM1956 | LjB12K02  | 3 | x5 | walking | DF093535 |
|        |       | 1 |     | CM1956 | LjB370E11 | 3 | x5 | walking | DF093535 |
|        |       | 1 |     | CM1956 | LjT10M20  | 3 | x5 | walking | DF093535 |
|        |       | 1 |     | CM1956 | LjB05K02  | 3 | x5 | walking | DF093535 |
|        |       | 1 |     | CM1956 | LjB19O14  | 3 | x5 | seed    | DF093535 |
| BM1737 | SSR   | 1 | 0.0 |        | LjB20D08  | 3 | x5 | seed    | AP009633 |
|        |       | 1 |     | CM0174 | LjB15M15  | 1 | x3 | walking | DF093308 |
| TM0174 | dCAPS | 1 | 0.0 | CM0174 | LjT45O19  | 3 | x5 | seed    | DF093308 |
| TM0092 | dCAPS | 1 | 0.0 |        | LjT03K08  | 3 | x5 | seed    | AP009651 |
| TM1475 | SSR   | 1 | 0.0 |        | LjT16B05  | 1 | x3 | seed    | AP010202 |

|        |       |   |     |        |          |   |    |         |                                                             |
|--------|-------|---|-----|--------|----------|---|----|---------|-------------------------------------------------------------|
| TM0454 | SSR   | 1 | 0.0 |        | LjT29N14 | 1 | x3 | seed    | AP009985                                                    |
| TM1703 | SSR   | 1 | 0.0 |        | LjT48M07 | 3 | x5 | seed    | AP009696                                                    |
|        |       | 1 |     | CM0192 | LjT11J08 | 1 | x3 | walking | DF093319                                                    |
| TM0192 | dCAPS | 1 | 0.0 | CM0192 | LjT40L14 | 3 | x5 | seed    | DF093319                                                    |
|        |       | 1 |     | CM0192 | LjT43D23 | 1 | x3 | seed    | DF093319                                                    |
| TM0252 | SSR   | 1 | 0.0 |        | LjT39K18 | 3 | x5 | seed    | AP009805(a),<br>AP009806(b),<br>AP009807(c),<br>AP009808(d) |
| TM1436 | SSR   | 1 | 0.0 | CM0668 | LjT37F08 | 1 | x3 | seed    | DF093465                                                    |
|        |       | 1 |     | CM0668 | LjT01M22 | 1 | x3 | seed    | DF093465                                                    |
| TM1542 | SSR   | 1 | 0.0 |        | LjT32B13 | 1 | x3 | seed    | AP010217                                                    |
| TM1841 | SSR   | 1 | 0.0 |        | LjT10G23 | 3 | x5 | seed    | AP009730                                                    |
| TM1840 | SSR   | 1 | 0.0 |        | LjT06C08 | 3 | x5 | seed    | AP009729                                                    |
| TM1868 | SSR   | 1 | 0.0 |        | LjT14B18 | 3 | x5 | seed    | AP009740                                                    |
| BM1966 | SSR   | 1 | 0.0 |        | LjB17A22 | 3 | x5 | seed    | AP009638                                                    |
| TM1842 | SSR   | 1 | 0.0 |        | LjT08C17 | 3 | x5 | seed    | AP009731                                                    |
| BM1991 | SSR   | 1 | 0.0 |        | LjB21G05 | 3 | x5 | seed    | AP009641                                                    |
| TM0103 | SSR   | 1 | 0.0 |        | LjT26E16 | 3 | x5 | seed    | AP009652                                                    |
| TM0023 | SSR   | 1 | 0.0 | CM0023 | LjT17G08 | 3 | x5 | seed    | DF093196                                                    |
|        |       | 1 |     | CM0023 | LjT41O15 | 1 | x3 | walking | DF093196                                                    |
|        |       | 1 |     | CM0123 | LjT11C12 | 1 | x3 | walking | DF093274                                                    |
| TM0123 | SSR   | 1 | 0.0 | CM0123 | LjT42E10 | 3 | x5 | seed    | DF093274                                                    |
|        |       | 1 |     | CM0123 | LjT21O21 | 1 | x3 | walking | DF093274                                                    |
| TM1265 | SSR   | 1 | 0.0 |        | LjT31L11 | 1 | x3 | seed    | AP010176                                                    |
|        |       | 1 |     | CM0027 | LjB03D13 | 3 | x3 | walking | DF093200                                                    |

|        |       |   |     |        |           |   |    |         |          |
|--------|-------|---|-----|--------|-----------|---|----|---------|----------|
| TM0027 | SSR   | 1 | 0.0 | CM0027 | LjT08B24  | 3 | x5 | seed    | DF093200 |
| TM0181 | SSR   | 1 | 0.0 | CM0181 | LjT09A07b | 3 | x5 | seed    | DF093315 |
|        |       | 1 |     | CM0181 | LjT45E22  | 1 | x3 | walking | DF093315 |
| TM0507 | SSR   | 1 | 0.4 |        | LjT46M16  | 1 | x3 | seed    | AP009997 |
| TM0496 | SSR   | 1 | 0.8 | CM0496 | LjT34N02  | 1 | x3 | seed    | DF093435 |
| TM1046 | SSR   | 1 | 0.8 | CM0496 | LjT05F14  | 1 | x3 | seed    | DF093435 |
| TM1305 | SSR   | 1 | 0.8 |        | LjT43O05  | 1 | x3 | seed    | AP010180 |
|        |       | 1 |     | CM0039 | LjT15E08  | 1 | x3 | walking | DF093209 |
| TM0039 | dCAPS | 1 | 1.2 | CM0039 | LjT02D01  | 3 | x5 | seed    | DF093209 |
|        |       | 1 |     | CM0039 | LjT46N01  | 1 | x3 | walking | DF093209 |
| TM0207 | dCAPS | 1 | 1.2 |        | LjT41E18  | 3 | x5 | seed    | AP009658 |
| TM0320 | dCAPS | 1 | 1.2 | CM0320 | LjT29O08  | 3 | x5 | seed    | DF093385 |
|        |       | 1 |     | CM0320 | LjT17N12  | 1 | x3 | walking | DF093385 |
| TM0653 | SSR   | 1 | 1.2 | CM0320 | LjT14F08  | 1 | x3 | seed    | DF093385 |
|        |       | 1 |     | CM0476 | LjT12G04  | 1 | x3 | walking | DF093433 |
| TM0476 | SSR   | 1 | 1.2 | CM0476 | LjT33P04  | 3 | x5 | seed    | DF093433 |
|        |       | 1 |     | CM0476 | LjT18E21  | 1 | x5 | seed    | DF093433 |
| TM1394 | SSR   | 1 | 1.2 | CM0794 | LjT25M20  | 1 | x3 | seed    | DF093483 |
|        |       | 1 |     | CM0794 | LjT28E14  | 1 | x3 | seed    | DF093483 |
| TM1003 | SSR   | 1 | 1.2 | CM0248 | LjT13P21  | 3 | x5 | seed    | DF093349 |
|        |       | 1 |     | CM0248 | LjT38J20  | 2 | x5 | seed    | DF093349 |
|        |       | 1 |     | CM0248 | LjT26F07  | 1 | x3 | walking | DF093349 |
| TM0248 | dCAPS | 1 | 1.6 | CM0248 | LjT10I22  | 3 | x5 | seed    | DF093349 |
|        |       | 1 |     | CM0248 | LjT21D14  | 1 | x3 | walking | DF093349 |
|        |       | 1 |     | CM0125 | LjB07E24  | 1 | x3 | walking | DF093276 |

|        |       |   |     |        |           |   |    |         |                             |
|--------|-------|---|-----|--------|-----------|---|----|---------|-----------------------------|
| TM0125 | SSR   | 1 | 1.6 | CM0125 | LjT19C08  | 3 | x5 | seed    | DF093276                    |
|        |       | 1 |     | CM0032 | LjT05K14  | 1 | x3 | walking | DF093204                    |
| TM0032 | SSR   | 1 | 1.6 | CM0032 | LjT05P21  | 3 | x5 | seed    | DF093204                    |
|        |       | 1 |     | CM0032 | LjT12B03  | 1 | x3 | walking | DF093204                    |
|        |       | 1 |     | CM0032 | LjT07E21  | 3 | x3 | walking | DF093204                    |
| TM1730 | SSR   | 1 | 1.6 |        | LjT07G07  | 3 | x5 | seed    | AP009852(a),<br>AP009853(b) |
| TM0862 | SSR   | 1 | 2.8 |        | LjT27C19  | 1 | x3 | seed    | AP010115                    |
| TM0036 | SSR   | 1 | 2.8 | CM0036 | LjT03K03  | 3 | x5 | seed    | DF093207                    |
|        |       | 1 |     | CM0036 | LjT22N16  | 1 | x3 | walking | DF093207                    |
| TM0955 | SSR   | 1 | 3.6 | CM0955 | LjT14P03  | 1 | x3 | seed    | DF093500                    |
|        |       | 1 |     | CM0955 | LjT29A16  | 2 | x5 | walking | DF093500                    |
| TM1968 | SSR   | 1 | 3.8 |        | LjT35H06  | 3 | x5 | seed    | AP009780                    |
|        |       | 1 |     | CM0094 | LjT17D12  | 3 | x5 | walking | DF093250                    |
| TM0510 | SSR   | 1 | 4.0 | CM0094 | LjT18G06  | 1 | x5 | seed    | DF093250                    |
| BM1800 | SSR   | 1 | 4.0 | CM0094 | LjB19C13  | 3 | x5 | walking | DF093250                    |
| TM0094 | dCAPS | 1 | 4.0 | CM0094 | LjT10J03  | 3 | x5 | seed    | DF093250                    |
|        |       | 1 |     | CM0094 | LjT58K23  | 1 | x3 | walking | DF093250                    |
| TM1306 | SSR   | 1 | 4.0 | CM0094 | LjT41G02  | 1 | x3 | seed    | DF093250                    |
|        |       | 1 |     | CM0063 | LjT44E03  | 1 | x3 | walking | DF093230                    |
| TM0063 | SSR   | 1 | 4.8 | CM0063 | LjT09L22  | 3 | x5 | seed    | DF093230                    |
|        |       | 1 |     | CM0063 | LjT36H16  | 1 | x3 | walking | DF093230                    |
| TM1410 | SSR   | 1 | 5.6 |        | LjT40H13  | 1 | x3 | seed    | AP010187                    |
|        |       | 1 |     | CM0982 | LjB141J17 | 1 | x3 | walking | DF093502                    |
| TM0982 | SSR   | 1 | 7.6 | CM0982 | LjT10N18  | 1 | x3 | seed    | DF093502                    |

|        |     |   |      |        |          |   |    |         |          |
|--------|-----|---|------|--------|----------|---|----|---------|----------|
| TM0523 | SSR | 1 | 8.0  |        | LjT39K06 | 1 | x3 | seed    | AP010002 |
| TM1894 | SSR | 1 | 8.0  |        | LjT20M22 | 2 | x5 | seed    | AP009879 |
| TM0050 | SSR | 1 | 8.8  | CM0050 | LjT03J05 | 3 | x5 | seed    | DF093219 |
|        |     | 1 |      | CM0050 | LjB08A07 | 1 | x3 | walking | DF093219 |
| TM0671 | SSR | 1 | 8.8  |        | LjT45O14 | 1 | x3 | seed    | AP010043 |
|        |     | 1 |      | CM0133 | LjB25H22 | 3 | x5 | walking | DF093282 |
| TM0349 | SSR | 1 | 11.3 | CM0133 | LjT16F22 | 3 | x5 | seed    | DF093282 |
|        |     | 1 |      | CM0133 | LjT47B11 | 1 | x3 | walking | DF093282 |
| TM1929 | SSR | 1 | 11.7 | CM0133 | LjT12P09 | 3 | x5 | seed    | DF093282 |
|        |     | 1 |      | CM0133 | LjT61C17 | 3 | x5 | walking | DF093282 |
| TM0154 | SSR | 1 | 12.1 | CM0133 | LjT26D17 | 3 | x5 | seed    | DF093282 |
|        |     | 1 |      | CM0133 | LjT32A11 | 1 | x5 | seed    | DF093282 |
| TM0133 | SSR | 1 | 12.1 | CM0133 | LjT34I04 | 3 | x5 | seed    | DF093282 |
|        |     | 1 |      | CM0133 | LjT12P07 | 1 | x3 | walking | DF093282 |
| TM1507 | SSR | 1 | 12.1 | CM0133 | LjT12K04 | 1 | x3 | walking | DF093282 |
|        |     | 1 |      | CM0133 | LjT37F06 | 3 | x5 | walking | DF093282 |
| TM0433 | SSR | 1 | 12.1 | CM0433 | LjT04F10 | 1 | x3 | seed    | DF093421 |
|        |     | 1 |      | CM0433 | LjT59O05 | 1 | x3 | walking | DF093421 |
| TM0498 | SSR | 1 | 12.1 |        | LjT33H07 | 1 | x3 | seed    | AP009994 |
| TM1633 | SSR | 1 | 12.1 |        | LjT03I11 | 1 | x3 | seed    | AP010233 |
| TM0534 | SSR | 1 | 12.5 |        | LjT04O21 | 1 | x3 | seed    | AP010005 |
| TM0442 | SSR | 1 | 12.5 | CM0442 | LjT45E10 | 1 | x3 | seed    | DF093424 |
| TM1621 | SSR | 1 | 12.5 | CM0442 | LjT43J12 | 1 | x3 | seed    | DF093424 |
| BM1404 | SSR | 1 | 12.9 | CM0760 | LjB24D20 | 3 | x3 | seed    | DF093479 |
|        |     | 1 |      | CM0760 | LjT47A24 | 1 | x3 | walking | DF093479 |



|        |       |   |      |        |          |   |    |         |                             |
|--------|-------|---|------|--------|----------|---|----|---------|-----------------------------|
| TM0372 | SSR   | 1 | 13.3 |        | LjT36G06 | 3 | x5 | seed    | AP009819(a),<br>AP009820(b) |
| TM0483 | SSR   | 1 | 13.3 |        | LjT12B11 | 1 | x3 | seed    | AP009991                    |
| TM1767 | SSR   | 1 | 13.3 |        | LjT35C22 | 3 | x5 | seed    | AP009709                    |
| TM0487 | SSR   | 1 | 14.5 |        | LjT04O06 | 3 | x5 | seed    | AP009674                    |
| TM0334 | SSR   | 1 | 16.1 | CM0233 | LjT02G18 | 3 | x5 | seed    | DF093339                    |
| TM0670 | SSR   | 1 | 16.9 | CM0233 | LjT16H21 | 1 | x3 | seed    | DF093339                    |
| TM0233 | dCAPS | 1 | 17.3 | CM0233 | LjT30O01 | 3 | x5 | seed    | DF093339                    |
|        |       | 1 |      | CM0195 | LjB21A21 | 1 | x3 | walking | DF093321                    |
| TM0195 | SSR   | 1 | 17.7 | CM0195 | LjT39G11 | 3 | x5 | seed    | DF093321                    |
|        |       | 1 |      | CM0195 | LjB16H08 | 1 | x3 | walking | DF093321                    |
| TM0275 | dCAPS | 1 | 17.7 | CM0275 | LjT29K22 | 3 | x5 | seed    | DF093359                    |
|        |       | 1 |      | CM0275 | LjB06G06 | 1 | x3 | walking | DF093359                    |
| TM0952 | SSR   | 1 | 17.7 |        | LjT34C24 | 3 | x5 | seed    | AP009682                    |
|        |       | 1 |      | CM0121 | LjB12P10 | 1 | x3 | walking | DF093272                    |
| TM0121 | dCAPS | 1 | 20.1 | CM0121 | LjT35I07 | 3 | x5 | seed    | DF093272                    |
|        |       | 1 |      | CM0178 | LjB18G14 | 1 | x3 | walking | DF093312                    |
| TM0193 | SSR   | 1 | 20.1 | CM0178 | LjT29P11 | 3 | x5 | seed    | DF093312                    |
|        |       | 1 |      | CM0178 | LjB04J07 | 1 | x3 | walking | DF093312                    |
|        |       | 1 |      | CM0178 | LjB73O17 | 1 | x3 | walking | DF093312                    |
| TM0178 | dCAPS | 1 | 20.1 | CM0178 | LjT43N05 | 3 | x5 | seed    | DF093312                    |
|        |       | 1 |      | CM0178 | LjT10P24 | 1 | x3 | walking | DF093312                    |
| BM1732 | SSR   | 1 | 20.1 |        | LjB18K24 | 2 | x5 | seed    | AP009864                    |
| TM1078 | SSR   | 1 | 20.9 |        | LjT01D01 | 1 | x3 | seed    | AP010155                    |
| TM0386 | SSR   | 1 | 21.7 |        | LjT45A19 | 1 | x3 | seed    | AP009963                    |

|        |       |   |      |        |          |   |    |         |          |
|--------|-------|---|------|--------|----------|---|----|---------|----------|
| TM1844 | SSR   | 1 | 22.5 |        | LjT09E07 | 3 | x5 | seed    | AP009732 |
| TM1255 | SSR   | 1 | 23.3 | CM1255 | LjT43J08 | 3 | x5 | seed    | DF093511 |
|        |       | 1 |      | CM1255 | LjB20B09 | 3 | x5 | seed    | DF093511 |
| TM1854 | SSR   | 1 | 23.3 |        | LjT06I14 | 3 | x5 | seed    | AP009733 |
| TM0101 | SSR   | 1 | 24.4 | CM0101 | LjT02F07 | 3 | x5 | seed    | DF093256 |
|        |       | 1 |      | CM0101 | LjB15P21 | 1 | x3 | walking | DF093256 |
| BM1485 | SSR   | 1 | 26.1 | CM0284 | LjB07M21 | 1 | x3 | walking | DF093365 |
|        |       | 1 |      | CM0284 | LjT30A24 | 3 | x5 | walking | DF093365 |
| TM1486 | SSR   | 1 | 26.1 | CM0284 | LjT56G08 | 1 | x3 | seed    | DF093365 |
|        |       | 1 |      | CM0284 | LjT23I21 | 2 | x3 | walking | DF093365 |
| TM0284 | SSR   | 1 | 26.1 | CM0284 | LjT34J23 | 3 | x5 | seed    | DF093365 |
| TM1444 | SSR   | 1 | 27.7 |        | LjT10B06 | 1 | x3 | seed    | AP010195 |
| TM1671 | SSR   | 1 | 28.1 |        | LjT08E15 | 1 | x5 | seed    | AP010250 |
| TM1635 | SSR   | 1 | 28.1 |        | LjT16J16 | 1 | x3 | seed    | AP010235 |
|        |       | 1 |      | CM1413 | LjT34K15 | 1 | x3 | seed    | DF093515 |
| TM1602 | SSR   | 1 | 28.5 | CM1413 | LjT44I03 | 1 | x3 | seed    | DF093515 |
|        |       | 1 |      | CM1413 | LjT21N08 | 1 | x5 | seed    | DF093515 |
| TM0393 | SSR   | 1 | 28.9 | CM0393 | LjT14E18 | 1 | x3 | seed    | DF093409 |
| TM0575 | SSR   | 1 | 28.9 | CM0393 | LjT43J06 | 1 | x3 | seed    | DF093409 |
| TM0051 | dCAPS | 1 | 29.3 | CM0051 | LjT13M13 | 3 | x5 | seed    | DF093220 |
| TM0199 | SSR   | 1 | 29.3 | CM0051 | LjT40C04 | 3 | x5 | seed    | DF093220 |
|        |       | 1 |      | CM0051 | LjT46I06 | 1 | x3 | walking | DF093220 |
| TM1869 | SSR   | 1 | 29.3 |        | LjT29L18 | 2 | x5 | seed    | AP009877 |
|        |       | 1 |      | CM0141 | LjT58F09 | 1 | x3 | walking | DF093287 |
| TM0141 | SSR   | 1 | 29.7 | CM0141 | LjT28H14 | 3 | x5 | seed    | DF093287 |

|        |       |   |      |        |          |   |    |         |          |
|--------|-------|---|------|--------|----------|---|----|---------|----------|
|        |       | 1 |      | CM0141 | LjT45L12 | 1 | x3 | walking | DF093287 |
| TM1325 | SSR   | 1 | 29.7 | CM0315 | LjT18C12 | 1 | x3 | seed    | DF093381 |
|        |       | 1 |      | CM0315 | LjT46B03 | 1 | x3 | walking | DF093381 |
| TM0315 | SSR   | 1 | 29.7 | CM0315 | LjT39B10 | 3 | x5 | seed    | DF093381 |
| TM0187 | dCAPS | 1 | 30.1 |        | LjT11G20 | 1 | x5 | seed    | AP009955 |
| BM1745 | SSR   | 1 | 30.9 | CM0410 | LjB15M22 | 3 | x5 | walking | DF093415 |
|        |       | 1 |      | CM0410 | LjT09A08 | 3 | x5 | walking | DF093415 |
| TM0410 | SSR   | 1 | 30.9 | CM0410 | LjT30G19 | 1 | x3 | seed    | DF093415 |
| TM1701 | SSR   | 1 | 31.3 | CM0410 | LjT26M18 | 3 | x5 | walking | DF093415 |
|        |       | 1 |      | CM0410 | LjT30G14 | 1 | x3 | seed    | DF093415 |
| TM1168 | SSR   | 1 | 31.3 |        | LjT34H22 | 1 | x3 | seed    | AP010162 |
| TM0163 | dCAPS | 1 | 31.7 | CM0163 | LjT35J19 | 3 | x5 | seed    | DF093299 |
| BM1196 | SSR   | 1 | 31.7 | CM0163 | LjB70O07 | 1 | x3 | walking | DF093299 |
|        |       | 1 |      | CM0163 | LjT37G03 | 1 | x3 | seed    | DF093299 |
|        |       | 1 |      | CM0215 | LjT56C20 | 1 | x3 | walking | DF093330 |
| TM0215 | SSR   | 1 | 33.3 | CM0215 | LjT36C05 | 3 | x5 | seed    | DF093330 |
| BM1697 | SSR   | 1 | 33.7 |        | LjB10L14 | 3 | x5 | seed    | AP009628 |
| TM1612 | SSR   | 1 | 34.5 |        | LjT14I13 | 1 | x3 | seed    | AP010230 |
| TM0688 | SSR   | 1 | 34.9 |        | LjT23O20 | 1 | x3 | seed    | AP010048 |
| TM0637 | SSR   | 1 | 35.3 |        | LjT36P09 | 1 | x3 | seed    | AP010032 |
| TM1124 | SSR   | 1 | 37.8 |        | LjT41J07 | 1 | x3 | seed    | AP010158 |
| TM0220 | SSR   | 1 | 38.2 |        | LjT23D08 | 3 | x5 | seed    | AP009660 |
|        |       | 1 |      | CM0017 | LjT37O24 | 1 | x3 | seed    | DF093191 |
|        |       | 1 |      | CM0017 | LjT40C16 | 1 | x3 | seed    | DF093191 |
| TM0117 | SSR   | 1 | 40.2 | CM0017 | LjT43B20 | 3 | x5 | seed    | DF093191 |

|        |       |   |      |        |          |   |    |         |          |
|--------|-------|---|------|--------|----------|---|----|---------|----------|
|        |       | 1 |      | CM0017 | LjT09F06 | 2 | x5 | seed    | DF093191 |
| TM0017 | SSR   | 1 | 42.2 | CM0017 | LjT06I17 | 3 | x5 | seed    | DF093191 |
|        |       | 1 |      | CM0017 | LjT47H11 | 1 | x3 | walking | DF093191 |
|        |       | 1 |      | CM0231 | LjT04A18 | 1 | x3 | walking | DF093338 |
| TM0231 | SSR   | 1 | 42.2 | CM0231 | LjT09O08 | 3 | x5 | seed    | DF093338 |
|        |       | 1 |      | CM0231 | LjB26C21 | 1 | x3 | walking | DF093338 |
|        |       | 1 |      | CM0231 | LjT25J06 | 1 | x3 | walking | DF093338 |
| TM0240 | SSR   | 1 | 42.6 |        | LjT37A17 | 3 | x5 | seed    | AP009664 |
|        |       | 1 |      | CM0150 | LjT46G03 | 1 | x3 | seed    | DF093292 |
|        |       | 1 |      | CM0150 | LjT16L24 | 1 | x3 | walking | DF093292 |
| TM0438 | SSR   | 1 | 42.6 | CM0150 | LjT44N06 | 3 | x5 | seed    | DF093292 |
|        |       | 1 |      | CM0150 | LjT19F13 | 1 | x3 | walking | DF093292 |
| TM0150 | dCAPS | 1 | 42.6 | CM0150 | LjT20G22 | 3 | x5 | seed    | DF093292 |
|        |       | 1 |      | CM0150 | LjT10D09 | 1 | x3 | walking | DF093292 |
|        |       | 1 |      | CM0113 | LjB16L15 | 1 | x3 | walking | DF093265 |
| TM0113 | SSR   | 1 | 42.6 | CM0113 | LjT43P05 | 3 | x5 | seed    | DF093265 |
|        |       | 1 |      | CM0113 | LjT55F02 | 1 | x3 | walking | DF093265 |
| TM0309 | SSR   | 1 | 42.6 | CM0113 | LjT15N15 | 3 | x5 | seed    | DF093265 |
|        |       | 1 |      | CM0113 | LjT02B05 | 1 | x3 | walking | DF093265 |
|        |       | 1 |      | CM0147 | LjB03L08 | 1 | x3 | walking | DF093290 |
| TM0342 | SSR   | 1 | 44.2 | CM0147 | LjT05H03 | 3 | x5 | seed    | DF093290 |
|        |       | 1 |      | CM0147 | LjT30B08 | 1 | x3 | walking | DF093290 |
| TM0147 | SSR   | 1 | 44.2 | CM0147 | LjT34B12 | 3 | x5 | seed    | DF093290 |
| TM0185 | SSR   | 1 | 44.2 | CM0147 | LjT11J24 | 3 | x5 | seed    | DF093290 |
|        |       | 1 |      | CM0147 | LjT04O18 | 1 | x3 | walking | DF093290 |

|        |       |   |      |        |          |   |    |         |          |
|--------|-------|---|------|--------|----------|---|----|---------|----------|
| TM0430 | SSR   | 1 | 44.2 |        | LjT43D18 | 1 | x3 | seed    | AP009975 |
| TM1284 | SSR   | 1 | 44.2 |        | LjT44L17 | 1 | x3 | seed    | AP010177 |
| TM1666 | SSR   | 1 | 44.6 |        | LjT36F23 | 1 | x3 | seed    | AP010248 |
| TM1516 | SSR   | 1 | 44.6 |        | LjT46N10 | 1 | x3 | seed    | AP010208 |
| TM0800 | SSR   | 1 | 45.0 | CM0800 | LjT43C21 | 1 | x3 | seed    | DF093484 |
|        |       | 1 |      | CM0800 | LjB66I07 | 1 | x3 | walking | DF093484 |
|        |       | 1 |      | CM0800 | LjT48M16 | 1 | x5 | walking | DF093484 |
|        |       | 1 |      | CM0800 | LjT03A07 | 1 | x3 | seed    | DF093484 |
| TM0989 | SSR   | 1 | 45.4 |        | LjT36I17 | 1 | x3 | seed    | AP010144 |
| TM0316 | SSR   | 1 | 46.2 | CM0316 | LjT02I08 | 3 | x5 | seed    | DF093382 |
|        |       | 1 |      | CM0316 | LjB13J04 | 1 | x3 | walking | DF093382 |
|        |       | 1 |      | CM0001 | LjT48G21 | 1 | x3 | seed    | DF093176 |
|        |       | 1 |      | CM0001 | LjT16O19 | 1 | x3 | walking | DF093176 |
| TM0001 | SSR   | 1 | 47.0 | CM0001 | LjT09C23 | 3 | x5 | seed    | DF093176 |
|        |       | 1 |      | CM0001 | LjT02F04 | 3 | x5 | seed    | DF093176 |
| TM1818 | SSR   | 1 | 47.0 | CM0001 | LjT28C03 | 3 | x5 | walking | DF093176 |
| TM0805 | SSR   | 1 | 47.5 |        | LjT16O03 | 1 | x5 | seed    | AP010091 |
|        |       | 1 |      | CM0064 | LjT05I18 | 1 | x3 | walking | DF093231 |
| TM0064 | dCAPS | 1 | 49.0 | CM0064 | LjT06B17 | 3 | x5 | seed    | DF093231 |
| TM0356 | SSR   | 1 | 51.4 |        | LjT08H21 | 1 | x5 | seed    | AP009960 |
| TM1880 | SSR   | 1 | 51.4 | CM1880 | LjT41E05 | 3 | x5 | seed    | DF093533 |
|        |       | 1 |      | CM1880 | LjT23N18 | 2 | x5 | seed    | DF093533 |
| BM1186 | SSR   | 1 | 51.8 | CM0593 | LjB69F06 | 1 | x3 | walking | DF093454 |
|        |       | 1 |      | CM0593 | LjT09H02 | 3 | x5 | seed    | DF093454 |
| TM1207 | SSR   | 1 | 52.2 | CM0593 | LjT38O19 | 1 | x3 | walking | DF093454 |

|        |     |   |      |        |          |   |    |         |          |
|--------|-----|---|------|--------|----------|---|----|---------|----------|
| TM0222 | SSR | 1 | 52.2 | CM0222 | LjT15D21 | 3 | x5 | seed    | DF093333 |
|        |     | 1 |      | CM0222 | LjT31I13 | 1 | x3 | walking | DF093333 |
|        |     | 1 |      | CM0104 | LjB04M10 | 1 | x3 | walking | DF093258 |
|        |     | 1 |      | CM0104 | LjT35D17 | 3 | x5 | seed    | DF093258 |
| TM0107 | SSR | 1 | 52.6 | CM0104 | LjT28G12 | 3 | x5 | seed    | DF093258 |
|        |     | 1 |      | CM0104 | LjT44L12 | 1 | x3 | walking | DF093258 |
| TM0236 | SSR | 1 | 53.8 |        | LjT38H23 | 1 | x5 | seed    | AP009956 |
| TM0371 | SSR | 1 | 53.8 | CM0371 | LjT46E19 | 3 | x5 | seed    | DF093403 |
|        |     | 1 |      | CM0371 | LjT05K01 | 3 | x5 | walking | DF093403 |
| TM1640 | SSR | 1 | 55.8 | CM1409 | LjT02P18 | 1 | x3 | seed    | DF093514 |
| TM1418 | SSR | 1 | 55.8 | CM1409 | LjT34J20 | 1 | x3 | seed    | DF093514 |
|        |     | 1 |      | CM1409 | LjT02K05 | 1 | x3 | seed    | DF093514 |
|        |     | 1 |      | CM0098 | LjT19C10 | 1 | x3 | walking | DF093253 |
| TM0098 | SSR | 1 | 56.6 | CM0098 | LjT04C07 | 3 | x5 | seed    | DF093253 |
|        |     | 1 |      | CM0098 | LjT43M09 | 1 | x3 | walking | DF093253 |
| TM1911 | SSR | 1 | 56.6 |        | LjT01M20 | 3 | x5 | seed    | AP009755 |
|        |     | 1 |      | CM0269 | LjT34P12 | 1 | x3 | seed    | DF093357 |
| TM0269 | SSR | 1 | 57.0 | CM0269 | LjT04I09 | 3 | x5 | seed    | DF093357 |
|        |     | 1 |      | CM0269 | LjT40N03 | 1 | x3 | seed    | DF093357 |
|        |     | 1 |      | CM0816 | LjB05C24 | 3 | x5 | walking | DF093487 |
| TM0816 | SSR | 1 | 57.0 | CM0816 | LjT09K12 | 1 | x3 | seed    | DF093487 |
|        |     | 1 |      | CM0816 | LjT06H19 | 3 | x5 | walking | DF093487 |
|        |     | 1 |      | CM0816 | LjT02K21 | 3 | x5 | walking | DF093487 |
| TM1438 | SSR | 1 | 57.0 | CM0816 | LjT15P18 | 1 | x3 | seed    | DF093487 |
|        |     | 1 |      |        | LjB20I01 | 2 | x5 | walking | AP009865 |

|        |     |   |      |        |            |   |    |         |          |
|--------|-----|---|------|--------|------------|---|----|---------|----------|
|        |     | 1 |      | CM0009 | LjT35G21   | 1 | x3 | walking | DF093184 |
| TM0009 | SSR | 1 | 57.4 | CM0009 | LjT13B22   | 3 | x5 | seed    | DF093184 |
|        |     | 1 |      | CM0009 | LjB15J13   | 1 | x3 | walking | DF093184 |
| TM0276 | SSR | 1 | 57.8 | CM0009 | LjT03B16   | 3 | x5 | seed    | DF093184 |
| TM0509 | SSR | 1 | 57.8 |        | LjT38G13   | 1 | x3 | seed    | AP009999 |
|        |     | 1 |      | CM0398 | LjT20K12   | 1 | x3 | seed    | DF093411 |
| TM0398 | SSR | 1 | 57.8 | CM0398 | LjT47K05   | 1 | x3 | seed    | DF093411 |
|        |     | 1 |      | CM0318 | LjT02I22   | 1 | x3 | walking | DF093383 |
| TM0318 | SSR | 1 | 59.8 | CM0318 | LjT45A23   | 3 | x5 | seed    | DF093383 |
|        |     | 1 |      | CM0318 | LjT45H04   | 1 | x3 | walking | DF093383 |
| TM0221 | SSR | 1 | 60.2 |        | LjT38A19   | 3 | x5 | seed    | AP009661 |
| TM0812 | SSR | 1 | 60.2 |        | LjT05B18   | 1 | x3 | seed    | AP010097 |
| TM0322 | SSR | 1 | 60.6 | CM0322 | LjT17D07   | 3 | x5 | seed    | DF093386 |
|        |     | 1 |      | CM0322 | LjT11I07   | 2 | x3 | walking | DF093386 |
| TM0935 | SSR | 1 | 60.6 | CM0375 | LjT03B08   | 1 | x3 | seed    | DF093405 |
| TM0605 | SSR | 1 | 60.6 | CM0375 | LjT37I21   | 1 | x3 | seed    | DF093405 |
| TM0375 | SSR | 1 | 60.6 | CM0375 | LjT45D03   | 3 | x5 | seed    | DF093405 |
| TM1643 | SSR | 1 | 61.0 | CM0295 | LjT30B06   | 1 | x3 | seed    | DF093369 |
| TM0295 | SSR | 1 | 61.4 | CM0295 | LjT47J05   | 1 | x3 | seed    | DF093369 |
| TM0332 | SSR | 1 | 61.4 | CM0295 | LjT27M11   | 3 | x5 | seed    | DF093369 |
|        |     | 1 |      | CM0295 | LjT23A03   | 1 | x3 | walking | DF093369 |
|        |     | 1 |      | CM0295 | LjT06I08ab | 3 | x5 | seed    | DF093369 |
|        |     | 1 |      | CM0295 | LjB22E06   | 1 | x3 | walking | DF093369 |
| TM2017 | SSR | 1 | 61.8 | CM0295 | LjT18M13   | 3 | x5 | seed    | DF093369 |
|        |     | 1 |      | CM0295 | LjT27B01   | 3 | x5 | walking | DF093369 |

|        |       |   |      |        |          |   |    |         |          |
|--------|-------|---|------|--------|----------|---|----|---------|----------|
|        |       | 1 |      | CM0033 | LjT18M23 | 2 | x5 | walking | DF093205 |
|        |       | 1 |      | CM0033 | LjT35G11 | 2 | x5 | walking | DF093205 |
|        |       | 1 |      | CM0033 | LjT58D09 | 3 | x5 | walking | DF093205 |
| BM1994 | SSR   | 1 | 62.2 | CM0033 | LjB05O03 | 3 | x5 | seed    | DF093205 |
|        |       | 1 |      | CM0033 | LjB07N04 | 3 | x5 | walking | DF093205 |
| TM2015 | SSR   | 1 | 62.2 | CM0033 | LjT45O08 | 3 | x5 | walking | DF093205 |
| TM1322 | SSR   | 1 | 62.2 | CM0033 | LjT35E02 | 1 | x3 | seed    | DF093205 |
| TM0033 | SSR   | 1 | 62.2 | CM0033 | LjT07E11 | 3 | x5 | seed    | DF093205 |
|        |       | 1 |      | CM0033 | LjT16A03 | 3 | x5 | seed    | DF093205 |
| TM2016 | SSR   | 1 | 62.2 | CM0033 | LjT38C06 | 3 | x5 | walking | DF093205 |
|        |       | 1 |      | CM0012 | LjT13H23 | 1 | x3 | seed    | DF093187 |
| TM0908 | SSR   | 1 | 63.4 | CM0012 | LjT46L16 | 1 | x3 | seed    | DF093187 |
| TM0422 | SSR   | 1 | 63.4 | CM0012 | LjT12O19 | 1 | x3 | seed    | DF093187 |
| TM0012 | SSR   | 1 | 63.8 | CM0012 | LjT03H13 | 3 | x5 | seed    | DF093187 |
|        |       | 1 |      | CM0012 | LjT49G12 | 1 | x3 | walking | DF093187 |
| TM0705 | SSR   | 1 | 65.4 | CM0010 | LjT41J08 | 1 | x3 | seed    | DF093185 |
| TM0010 | SSR   | 1 | 65.4 | CM0010 | LjT01I13 | 3 | x5 | seed    | DF093185 |
|        |       | 1 |      | CM0010 | LjT38A06 | 1 | x3 | walking | DF093185 |
|        |       | 1 |      | CM0361 | LjT25O07 | 1 | x3 | walking | DF093402 |
| TM0980 | SSR   | 1 | 65.4 | CM0361 | LjT29P14 | 1 | x3 | seed    | DF093402 |
| TM1391 | SSR   | 1 | 65.4 | CM0361 | LjT41E03 | 3 | x5 | seed    | DF093402 |
|        |       | 1 |      | CM0361 | LjT43G12 | 1 | x3 | seed    | DF093402 |
|        |       | 1 |      | CM0361 | LjT33P08 | 1 | x3 | walking | DF093402 |
|        |       | 1 |      | CM0361 | LjT34C12 | 3 | x5 | seed    | DF093402 |
| TM0378 | dCAPS | 1 | 65.4 | CM0378 | LjT45M12 | 3 | x5 | seed    | DF093406 |



|        |       |   |      |        |           |   |    |         |          |
|--------|-------|---|------|--------|-----------|---|----|---------|----------|
|        |       | 1 |      | CM0378 | LjT19I13  | 1 | x3 | seed    | DF093406 |
|        |       | 1 |      | CM0378 | LjT08H16  | 1 | x3 | seed    | DF093406 |
| TM0785 | SSR   | 1 | 65.8 | CM0029 | LjT16N20  | 1 | x3 | seed    | DF093202 |
| TM0029 | SSR   | 1 | 65.8 | CM0029 | LjT11C13  | 3 | x5 | seed    | DF093202 |
|        |       | 1 |      | CM0029 | LjT09K14  | 1 | x3 | seed    | DF093202 |
|        |       | 1 |      | CM0206 | LjT36M24  | 1 | x3 | walking | DF093325 |
| TM0223 | SSR   | 1 | 66.2 | CM0206 | LjT44A10  | 3 | x5 | seed    | DF093325 |
|        |       | 1 |      | CM0206 | LjT04P23  | 1 | x3 | walking | DF093325 |
|        |       | 1 |      | CM0206 | LjT36E14  | 1 | x3 | walking | DF093325 |
| TM0206 | dCAPS | 1 | 66.2 | CM0206 | LjT16D13  | 3 | x5 | seed    | DF093325 |
|        |       | 1 |      | CM0206 | LjT56M23  | 1 | x3 | walking | DF093325 |
| TM0144 | SSR   | 1 | 66.2 | CM0122 | LjT27L02  | 3 | x5 | seed    | DF093273 |
| TM0143 | SSR   | 1 | 66.2 | CM0122 | LjT20J05  | 3 | x5 | seed    | DF093273 |
| TM0122 | SSR   | 1 | 66.2 | CM0122 | LjT45F11  | 3 | x5 | seed    | DF093273 |
|        |       | 1 |      | CM0122 | LjB15E24  | 1 | x3 | walking | DF093273 |
|        |       | 1 |      | CM0122 | LjT36K23  | 1 | x3 | seed    | DF093273 |
|        |       | 1 |      | CM0544 | LjB12K22  | 3 | x5 | seed    | DF093443 |
|        |       | 1 |      | CM0544 | LjT54J01  | 1 | x3 | walking | DF093443 |
| TM0544 | SSR   | 1 | 67.0 | CM0544 | LjT44N05  | 3 | x5 | seed    | DF093443 |
|        |       | 1 |      | CM0544 | LjB140D10 | 1 | x3 | walking | DF093443 |
|        |       | 1 |      | CM0109 | LjB04D14  | 1 | x3 | walking | DF093261 |
| TM0109 | SSR   | 1 | 67.0 | CM0109 | LjT25N10  | 3 | x5 | seed    | DF093261 |
| TM0811 | SSR   | 1 | 67.0 |        | LjT29L06  | 1 | x3 | seed    | AP010096 |
| TM1573 | SSR   | 1 | 67.0 |        | LjT30M08  | 2 | x5 | seed    | AP009873 |
| TM0600 | SSR   | 1 | 69.0 | CM0600 | LjT46P11  | 1 | x3 | seed    | DF093455 |

|        |       |   |      |        |          |   |    |         |          |
|--------|-------|---|------|--------|----------|---|----|---------|----------|
|        |       | 1 |      | CM0600 | LjT05A19 | 1 | x5 | seed    | DF093455 |
|        |       | 1 |      | CM0600 | LjT09K09 | 1 | x3 | walking | DF093455 |
| TM0835 | SSR   | 1 | 69.4 |        | LjT14G19 | 3 | x5 | seed    | AP009681 |
|        |       | 1 |      | CM0579 | LjT07K15 | 2 | x5 | seed    | DF093450 |
| BM1229 | SSR   | 1 | 69.4 | CM0579 | LjB18B20 | 1 | x3 | walking | DF093450 |
| TM1636 | SSR   | 1 | 69.4 | CM0579 | LjT17N03 | 1 | x3 | seed    | DF093450 |
| TM0750 | SSR   | 1 | 69.4 |        | LjT43L07 | 1 | x5 | seed    | AP010074 |
|        |       | 1 |      | CM0105 | LjT42H23 | 1 | x3 | walking | DF093259 |
|        |       | 1 |      | CM0105 | LjT36D11 | 1 | x3 | walking | DF093259 |
| TM0105 | SSR   | 1 | 71.0 | CM0105 | LjT17M09 | 3 | x5 | seed    | DF093259 |
|        |       | 1 |      | CM0105 | LjT62O06 | 3 | x5 | walking | DF093259 |
|        |       | 1 |      | CM0105 | LjT02K14 | 3 | x5 | walking | DF093259 |
| TM1494 | SSR   | 1 | 71.0 | CM0105 | LjT45I15 | 3 | x5 | seed    | DF093259 |
|        |       | 1 |      | CM0105 | LjT20F11 | 3 | x5 | walking | DF093259 |
|        |       | 1 |      | CM0105 | LjT46G19 | 1 | x5 | walking | DF093259 |
| TM0067 | SSR   | 2 | 0.0  | CM0067 | LjT12O09 | 3 | x5 | seed    | DF093234 |
|        |       | 2 |      | CM0067 | LjT41O24 | 3 | x5 | walking | DF093234 |
| TM0808 | SSR   | 2 | 0.4  |        | LjT44B19 | 1 | x3 | seed    | AP010093 |
|        |       | 2 |      | CM0237 | LjB64M03 | 1 | x3 | walking | DF093341 |
| TM0237 | SSR   | 2 | 0.4  | CM0237 | LjT30K08 | 3 | x5 | seed    | DF093341 |
|        |       | 2 |      | CM0262 | LjT15A20 | 1 | x3 | walking | DF093356 |
| TM0262 | dCAPS | 2 | 0.4  | CM0262 | LjT03H18 | 3 | x5 | seed    | DF093356 |
|        |       | 2 |      | CM0262 | LjT42L09 | 1 | x3 | walking | DF093356 |
| TM0847 | SSR   | 2 | 0.4  |        | LjT07F03 | 1 | x3 | seed    | AP010109 |
| TM0712 | SSR   | 2 | 0.4  |        | LjT10F02 | 1 | x3 | seed    | AP010057 |

|        |     |   |     |        |          |   |    |         |                                             |
|--------|-----|---|-----|--------|----------|---|----|---------|---------------------------------------------|
| TM1761 | SSR | 2 | 0.4 |        | LjT45D13 | 3 | x5 | seed    | AP009856(a),<br>AP009857(b)                 |
| TM1637 | SSR | 2 | 0.8 |        | LjT44M20 | 1 | x3 | seed    | AP010236                                    |
| BM2030 | SSR | 2 | 0.8 |        | LjB11M03 | 3 | x5 | seed    | AP009647                                    |
| BM1950 | SSR | 2 | 0.8 |        | LjB26H15 | 3 | x5 | seed    | AP009637                                    |
| TM1981 | SSR | 2 | 0.8 |        | LjT09A11 | 3 | x5 | seed    | AP009783                                    |
| BM1699 | SSR | 2 | 1.2 |        | LjB17A04 | 3 | x5 | seed    | AP009630                                    |
| TM0838 | SSR | 2 | 2.4 |        | LjT17A07 | 1 | x3 | seed    | AP010103                                    |
| TM1655 | SSR | 2 | 2.4 |        | LjT43N03 | 1 | x3 | seed    | AP010242                                    |
| TM0413 | SSR | 2 | 2.8 |        | LjT44L24 | 1 | x3 | seed    | AP009967                                    |
| TM0134 | SSR | 2 | 3.2 |        | LjT34H20 | 3 | x5 | seed    | AP009654                                    |
| TM1756 | SSR | 2 | 3.2 |        | LjT11L13 | 3 | x5 | seed    | AP009704                                    |
| TM1860 | SSR | 2 | 3.2 |        | LjT12G08 | 3 | x5 | seed    | AP009737                                    |
| TM1038 | SSR | 2 | 3.6 |        | LjT24G10 | 1 | x3 | seed    | AP010149                                    |
| TM1456 | SSR | 2 | 4.0 | CM0904 | LjT09D03 | 1 | x3 | seed    | DF093495                                    |
|        |     | 2 |     | CM0904 | LjT33P02 | 1 | x3 | walking | DF093495                                    |
| TM0368 | SSR | 2 | 4.0 |        | LjT39I14 | 3 | x5 | seed    | AP009816(a),<br>AP009817(b),<br>AP009818(c) |
| TM1583 | SSR | 2 | 4.0 |        | LjT40P05 | 1 | x3 | seed    | AP010227                                    |
| TM1171 | SSR | 2 | 5.2 |        | LjT45I07 | 1 | x3 | seed    | AP010164                                    |
| TM0875 | SSR | 2 | 6.0 |        | LjT16I15 | 1 | x3 | seed    | AP010120                                    |
| TM0074 | SSR | 2 | 6.2 | CM0074 | LjT18E24 | 3 | x5 | seed    | DF093238                                    |
|        |     | 2 |     | CM0074 | LjB16D22 | 1 | x3 | walking | DF093238                                    |
| TM0383 | SSR | 2 | 6.4 |        | LjT16L14 | 3 | x5 | seed    | AP009672                                    |
| TM0564 | SSR | 2 | 8.4 |        | LjT37J22 | 1 | x3 | seed    | AP010013                                    |

|        |       |   |      |        |          |   |    |         |                             |
|--------|-------|---|------|--------|----------|---|----|---------|-----------------------------|
|        |       | 2 |      | CM0312 | LjT02L01 | 1 | x3 | walking | DF093379                    |
| TM0312 | dCAPS | 2 | 8.8  | CM0312 | LjT29F18 | 3 | x5 | seed    | DF093379                    |
| TM0348 | SSR   | 2 | 8.8  | CM0312 | LjT40O04 | 3 | x5 | seed    | DF093379                    |
| TM0435 | SSR   | 2 | 8.8  |        | LjT47G24 | 1 | x3 | seed    | AP009977                    |
| TM0490 | SSR   | 2 | 8.8  |        | LjT01N23 | 3 | x5 | seed    | AP009675                    |
| TM0053 | SSR   | 2 | 9.6  |        | LjT01H08 | 3 | x5 | seed    | AP009650                    |
| TM0254 | dCAPS | 2 | 9.6  |        | LjT16L07 | 3 | x5 | seed    | AP009665                    |
| TM0310 | SSR   | 2 | 10.8 | CM0310 | LjT33E11 | 3 | x5 | seed    | DF093377                    |
|        |       | 2 |      | CM0310 | LjT04O04 | 1 | x3 | walking | DF093377                    |
| TM0153 | SSR   | 2 | 10.8 | CM0153 | LjT28L17 | 3 | x5 | seed    | DF093294                    |
|        |       | 2 |      | CM0153 | LjT49J19 | 1 | x3 | walking | DF093294                    |
| TM0610 | SSR   | 2 | 11.6 |        | LjT17O14 | 3 | x5 | seed    | AP009831(a),<br>AP009832(b) |
| TM1996 | SSR   | 2 | 12.0 |        | LjT41F02 | 3 | x5 | seed    | AP009785                    |
| TM0660 | SSR   | 2 | 12.8 | CM0660 | LjT07O13 | 1 | x3 | seed    | DF093464                    |
| TM1782 | SSR   | 2 | 12.8 | CM0660 | LjT15B05 | 3 | x5 | seed    | DF093464                    |
|        |       | 2 |      | CM0065 | LjB26D18 | 1 | x3 | walking | DF093232                    |
| TM0065 | SSR   | 2 | 14.0 | CM0065 | LjT11D15 | 3 | x5 | seed    | DF093232                    |
| TM0479 | SSR   | 2 | 14.0 |        | LjT43I20 | 1 | x3 | seed    | AP009989                    |
| TM1405 | SSR   | 2 | 14.0 | CM0783 | LjT22I07 | 1 | x3 | walking | DF093480                    |
|        |       | 2 |      | CM0783 | LjT43M11 | 1 | x3 | seed    | DF093480                    |
| TM0915 | SSR   | 2 | 14.0 | CM0373 | LjT07A18 | 1 | x3 | seed    | DF093404                    |
| TM0535 | SSR   | 2 | 14.0 | CM0373 | LjT10F01 | 2 | x5 | seed    | DF093404                    |
|        |       | 2 |      | CM0373 | LjT53O13 | 3 | x5 | walking | DF093404                    |
| TM1329 | SSR   | 2 | 14.0 | CM0373 | LjT41G23 | 1 | x3 | seed    | DF093404                    |

|        |       |   |      |        |          |   |    |         |                             |
|--------|-------|---|------|--------|----------|---|----|---------|-----------------------------|
|        |       | 2 |      | CM0373 | LjT24O01 | 3 | x5 | walking | DF093404                    |
| TM0373 | SSR   | 2 | 14.4 | CM0373 | LjT16A21 | 3 | x5 | seed    | DF093404                    |
|        |       | 2 |      | CM0373 | LjT43B09 | 1 | x5 | seed    | DF093404                    |
|        |       | 2 |      | CM0373 | LjT02A17 | 3 | x5 | walking | DF093404                    |
|        |       | 2 |      | CM0373 | LjT24F03 | 3 | x5 | walking | DF093404                    |
| TM1491 | SSR   | 2 | 17.7 | CM0373 | LjT47H03 | 1 | x3 | seed    | DF093404                    |
| TM1561 | SSR   | 2 | 18.9 |        | LjT18H02 | 3 | x5 | seed    | AP009692                    |
| TM1827 | SSR   | 2 | 18.9 |        | LjT32G18 | 3 | x5 | seed    | AP009720                    |
| TM0263 | SSR   | 2 | 19.3 |        | LjT30P12 | 3 | x5 | seed    | AP009666                    |
|        |       | 2 |      | CM0201 | LjT13J14 | 1 | x3 | seed    | DF093324                    |
| TM0201 | dCAPS | 2 | 20.5 | CM0201 | LjT47H13 | 3 | x5 | seed    | DF093324                    |
| TM0400 | SSR   | 2 | 21.7 | CM0201 | LjT45A22 | 3 | x5 | seed    | DF093324                    |
|        |       | 2 |      | CM0201 | LjT13C22 | 1 | x3 | seed    | DF093324                    |
| TM1766 | SSR   | 2 | 22.9 | CM0081 | LjT14B16 | 3 | x5 | seed    | DF093244                    |
| TM0081 | dCAPS | 2 | 24.6 | CM0081 | LjT01G01 | 3 | x5 | seed    | DF093244                    |
|        |       | 2 |      | CM0081 | LjT06B24 | 1 | x5 | walking | DF093244                    |
|        |       | 2 |      | CM0225 | LjT06K23 | 3 | x5 | seed    | DF093334                    |
| TM0225 | SSR   | 2 | 25.8 | CM0225 | LjT27K02 | 3 | x5 | seed    | DF093334                    |
|        |       | 2 |      | CM0225 | LjT04D07 | 1 | x3 | walking | DF093334                    |
| TM0377 | SSR   | 2 | 27.4 |        | LjT39I02 | 3 | x5 | seed    | AP009821(a),<br>AP009822(b) |
| TM1882 | SSR   | 2 | 28.3 |        | LjT16J19 | 3 | x5 | seed    | AP009746                    |
| TM0338 | SSR   | 2 | 30.2 | CM0338 | LjT05M24 | 3 | x5 | seed    | DF093393                    |
|        |       | 2 |      | CM0338 | LjT36E22 | 1 | x3 | walking | DF093393                    |
|        |       | 2 |      | CM0903 | LjT43M02 | 1 | x3 | seed    | DF093494                    |

|        |     |   |      |        |          |   |    |         |          |
|--------|-----|---|------|--------|----------|---|----|---------|----------|
| TM1455 | SSR | 2 | 31.0 | CM0903 | LjT11H20 | 1 | x3 | walking | DF093494 |
|        |     | 2 |      | CM0903 | LjT40G15 | 1 | x3 | seed    | DF093494 |
|        |     | 2 |      | CM0903 | LjT01E20 | 1 | x5 | walking | DF093494 |
| BM1626 | SSR | 2 | 31.8 | CM0903 | LjB18B24 | 1 | x5 | seed    | DF093494 |
| TM1731 | SSR | 2 | 32.6 | CM1731 | LjT28M24 | 3 | x5 | seed    | DF093526 |
| TM1963 | SSR | 2 | 32.6 | CM1731 | LjT29K03 | 3 | x5 | seed    | DF093526 |
| TM0655 | SSR | 2 | 33.0 |        | LjT09H11 | 1 | x3 | seed    | AP010042 |
| TM1403 | SSR | 2 | 33.0 | CM0749 | LjT05O01 | 1 | x3 | walking | DF093478 |
|        |     | 2 |      | CM0749 | LjT13J06 | 1 | x3 | seed    | DF093478 |
|        |     | 2 |      | CM0749 | LjT28N02 | 3 | x5 | walking | DF093478 |
| TM1773 | SSR | 2 | 33.0 |        | LjT47E17 | 3 | x5 | seed    | AP009711 |
| BM1721 | SSR | 2 | 33.4 | CM0124 | LjB24P14 | 3 | x5 | seed    | DF093275 |
|        |     | 2 |      | CM0124 | LjT48O14 | 1 | x3 | seed    | DF093275 |
| TM1263 | SSR | 2 | 33.4 | CM0124 | LjT39N23 | 1 | x3 | seed    | DF093275 |
|        |     | 2 |      | CM0124 | LjT15J21 | 1 | x3 | walking | DF093275 |
| TM0124 | SSR | 2 | 33.8 | CM0124 | LjT26I01 | 3 | x5 | seed    | DF093275 |
|        |     | 2 |      | CM0124 | LjB13M05 | 1 | x3 | walking | DF093275 |
|        |     | 2 |      | CM0124 | LjT08N18 | 3 | x5 | walking | DF093275 |
|        |     | 2 |      | CM0120 | LjT04J16 | 3 | x5 | walking | DF093271 |
|        |     | 2 |      | CM0120 | LjT57J16 | 1 | x3 | walking | DF093271 |
| TM0120 | SSR | 2 | 36.5 | CM0120 | LjT32P24 | 3 | x5 | seed    | DF093271 |
|        |     | 2 |      | CM0120 | LjB21N24 | 1 | x3 | walking | DF093271 |
|        |     | 2 |      | CM0641 | LjB15B24 | 3 | x5 | walking | DF093461 |
|        |     | 2 |      | CM0641 | LjT46E17 | 3 | x5 | walking | DF093461 |
| TM1805 | SSR | 2 | 37.9 | CM0641 | LjT20I14 | 3 | x5 | walking | DF093461 |

|        |       |   |      |        |          |   |    |         |          |
|--------|-------|---|------|--------|----------|---|----|---------|----------|
| TM0641 | SSR   | 2 | 38.7 | CM0641 | LjT06G07 | 1 | x3 | seed    | DF093461 |
|        |       | 2 |      | CM0641 | LjT10M19 | 3 | x5 | walking | DF093461 |
| TM0736 | SSR   | 2 | 40.3 | CM0608 | LjT33G24 | 1 | x3 | seed    | DF093458 |
| TM0608 | SSR   | 2 | 40.3 | CM0608 | LjT33L05 | 1 | x3 | seed    | DF093458 |
| TM1534 | SSR   | 2 | 40.3 | CM0608 | LjT38H08 | 3 | x5 | seed    | DF093458 |
|        |       | 2 |      | CM1150 | LjT04O12 | 1 | x3 | walking | DF093509 |
| TM1150 | SSR   | 2 | 40.7 | CM1150 | LjT33B06 | 1 | x3 | seed    | DF093509 |
|        |       | 2 |      | CM1150 | LjB23N09 | 1 | x3 | walking | DF093509 |
| TM0028 | SSR   | 2 | 42.3 | CM0028 | LjT12F12 | 3 | x5 | seed    | DF093201 |
|        |       | 2 |      | CM0028 | LjT23F19 | 1 | x3 | walking | DF093201 |
|        |       | 2 |      | CM0056 | LjT09H18 | 1 | x3 | walking | DF093223 |
| TM0056 | SSR   | 2 | 42.3 | CM0056 | LjT16I03 | 3 | x5 | seed    | DF093223 |
|        |       | 2 |      | CM0056 | LjT43I15 | 1 | x3 | walking | DF093223 |
|        |       | 2 |      | CM0008 | LjT11E07 | 1 | x3 | walking | DF093183 |
| TM0008 | SSR   | 2 | 44.2 | CM0008 | LjT10B11 | 3 | x5 | seed    | DF093183 |
| TM0242 | SSR   | 2 | 45.6 | CM0008 | LjT34L23 | 3 | x5 | seed    | DF093183 |
| TM0076 | SSR   | 2 | 46.0 | CM0008 | LjT13I21 | 3 | x5 | seed    | DF093183 |
|        |       | 2 |      | CM0008 | LjT42N20 | 1 | x3 | seed    | DF093183 |
| TM1901 | SSR   | 2 | 46.5 |        | LjT13P17 | 2 | x5 | seed    | AP009881 |
|        |       | 2 |      | CM0177 | LjB03D10 | 1 | x3 | walking | DF093311 |
| TM0541 | SSR   | 2 | 48.5 | CM0177 | LjT17H01 | 3 | x5 | seed    | DF093311 |
|        |       | 2 |      | CM0177 | LjT11E23 | 3 | x5 | seed    | DF093311 |
| TM0177 | dCAPS | 2 | 48.5 | CM0177 | LjT01N11 | 3 | x5 | seed    | DF093311 |
| TM0381 | dCAPS | 2 | 48.5 | CM0177 | LjT10N22 | 3 | x5 | seed    | DF093311 |
| TM0520 | SSR   | 2 | 48.5 | CM0177 | LjT47I01 | 3 | x5 | seed    | DF093311 |

|        |     |   |      |        |          |   |    |         |          |
|--------|-----|---|------|--------|----------|---|----|---------|----------|
| TM0230 | SSR | 2 | 48.9 |        | LjT41P23 | 3 | x5 | seed    | AP009662 |
| BM1153 | SSR | 2 | 48.9 | CM0020 | LjB02I05 | 1 | x3 | walking | DF093194 |
|        |     | 2 |      | CM0020 | LjT20J15 | 3 | x5 | seed    | DF093194 |
| TM0020 | SSR | 2 | 48.9 | CM0020 | LjT02F05 | 3 | x5 | seed    | DF093194 |
|        |     | 2 |      | CM0803 | LjB11B14 | 3 | x5 | walking | DF093485 |
| TM0974 | SSR | 2 | 49.3 | CM0803 | LjT12H02 | 1 | x3 | seed    | DF093485 |
|        |     | 2 |      | CM0803 | LjT14N05 | 3 | x5 | walking | DF093485 |
|        |     | 2 |      | CM0803 | LjT12C04 | 3 | x5 | walking | DF093485 |
|        |     | 2 |      | CM0803 | LjT10G21 | 3 | x5 | walking | DF093485 |
|        |     | 2 |      | CM0803 | LjT40H03 | 1 | x3 | seed    | DF093485 |
| TM0803 | SSR | 2 | 50.1 | CM0803 | LjT39E07 | 1 | x3 | seed    | DF093485 |
|        |     | 2 |      | CM0803 | LjT23F22 | 1 | x5 | walking | DF093485 |
| TM0886 | SSR | 2 | 51.7 | CM0272 | LjT35D16 | 1 | x3 | seed    | DF093358 |
| TM0272 | SSR | 2 | 51.7 | CM0272 | LjT03C14 | 3 | x5 | seed    | DF093358 |
|        |     | 2 |      | CM0272 | LjB65N09 | 1 | x3 | walking | DF093358 |
| TM1421 | SSR | 2 | 52.1 | CM0695 | LjT16F09 | 1 | x3 | seed    | DF093472 |
| BM1375 | SSR | 2 | 52.9 | CM0695 | LjB04A13 | 3 | x5 | seed    | DF093472 |
| TM0695 | SSR | 2 | 52.9 | CM0695 | LjT02P19 | 1 | x3 | seed    | DF093472 |
| TM0737 | SSR | 2 | 53.7 | CM0249 | LjT39J09 | 1 | x3 | seed    | DF093350 |
| BM1206 | SSR | 2 | 55.2 | CM0249 | LjB13I10 | 1 | x3 | walking | DF093350 |
|        |     | 2 |      | CM0249 | LjT17E09 | 3 | x5 | seed    | DF093350 |
| TM0249 | SSR | 2 | 55.7 | CM0249 | LjT34A19 | 3 | x5 | seed    | DF093350 |
|        |     | 2 |      | CM0249 | LjB69K05 | 1 | x3 | walking | DF093350 |
|        |     | 2 |      | CM0249 | LjB13F12 | 1 | x3 | walking | DF093350 |
| TM0257 | SSR | 2 | 56.1 | CM0249 | LjT29N11 | 3 | x5 | seed    | DF093350 |



|        |       |   |      |        |           |   |    |         |          |
|--------|-------|---|------|--------|-----------|---|----|---------|----------|
|        |       | 2 |      | CM0249 | LjT17G09  | 1 | x3 | walking | DF093350 |
| TM0549 | SSR   | 2 | 56.6 | CM0249 | LjT20E01  | 3 | x5 | seed    | DF093350 |
| TM0374 | SSR   | 2 | 58.1 |        | LjT34P04  | 1 | x5 | seed    | AP009961 |
| TM0652 | SSR   | 2 | 58.1 |        | LjT16G06  | 1 | x3 | seed    | AP010041 |
| TM0559 | SSR   | 2 | 58.9 | CM0323 | LjT01C03  | 3 | x5 | seed    | DF093387 |
| TM0323 | dCAPS | 2 | 58.9 | CM0323 | LjT18J10  | 3 | x5 | seed    | DF093387 |
|        |       | 2 |      | CM0323 | LjB06D23  | 3 | x5 | seed    | DF093387 |
| TM0522 | SSR   | 2 | 58.9 | CM0323 | LjT13I23  | 1 | x5 | seed    | DF093387 |
| TM0250 | SSR   | 2 | 60.1 | CM0250 | LjT08A24  | 3 | x5 | seed    | DF093351 |
| TM1037 | SSR   | 2 | 60.1 | CM0250 | LjT42E19  | 1 | x3 | seed    | DF093351 |
|        |       | 2 |      | CM0168 | LjB20F05  | 1 | x3 | walking | DF093303 |
| TM0168 | SSR   | 2 | 60.5 | CM0168 | LjT33C05  | 3 | x5 | seed    | DF093303 |
|        |       | 2 |      | CM0168 | LjB16K06  | 1 | x3 | walking | DF093303 |
| TM1389 | SSR   | 2 | 60.9 | CM0021 | LjT41P09  | 1 | x3 | walking | DF093195 |
|        |       | 2 |      | CM0021 | LjT09A07a | 3 | x3 | walking | DF093195 |
| TM0132 | SSR   | 2 | 60.9 | CM0021 | LjT19K21  | 3 | x5 | seed    | DF093195 |
|        |       | 2 |      | CM0021 | LjT40A14  | 3 | x3 | walking | DF093195 |
|        |       | 2 |      | CM0021 | LjB71C07  | 3 | x5 | walking | DF093195 |
|        |       | 2 |      | CM0021 | LjT28I23  | 3 | x5 | walking | DF093195 |
|        |       | 2 |      | CM0021 | LjT17M11  | 3 | x5 | seed    | DF093195 |
| TM0021 | SSR   | 2 | 60.9 | CM0021 | LjT04I02  | 3 | x5 | seed    | DF093195 |
|        |       | 2 |      | CM0021 | LjT30A05  | 1 | x3 | walking | DF093195 |
| TM0550 | SSR   | 2 | 60.9 | CM0021 | LjT17H09  | 3 | x5 | seed    | DF093195 |
| TM0521 | SSR   | 2 | 60.9 | CM0021 | LjT16A17  | 1 | x5 | seed    | DF093195 |
|        |       | 2 |      | CM0304 | LjT39E08  | 1 | x3 | walking | DF093374 |

|        |       |   |      |        |          |   |    |         |          |
|--------|-------|---|------|--------|----------|---|----|---------|----------|
| TM0934 | SSR   | 2 | 60.9 | CM0304 | LjT08G16 | 3 | x5 | seed    | DF093374 |
| BM1477 | SSR   | 2 | 60.9 | CM0304 | LjB10A07 | 3 | x5 | seed    | DF093374 |
|        |       | 2 |      | CM0304 | LjT31J14 | 1 | x3 | walking | DF093374 |
| TM0304 | SSR   | 2 | 60.9 | CM0304 | LjT41D09 | 3 | x5 | seed    | DF093374 |
|        |       | 2 |      | CM0304 | LjT48N18 | 1 | x3 | seed    | DF093374 |
|        |       | 2 |      | CM0304 | LjT57N07 | 3 | x3 | walking | DF093374 |
| TM0060 | SSR   | 2 | 60.9 | CM0060 | LjT04G24 | 3 | x5 | seed    | DF093227 |
|        |       | 2 |      | CM0060 | LjT45N17 | 1 | x5 | walking | DF093227 |
|        |       | 2 |      | CM0060 | LjT34D07 | 1 | x5 | walking | DF093227 |
| TM0635 | SSR   | 2 | 61.3 | CM0060 | LjT47B15 | 3 | x3 | seed    | DF093227 |
| TM0018 | SSR   | 2 | 61.3 | CM0018 | LjT08D14 | 3 | x5 | seed    | DF093192 |
|        |       | 2 |      | CM0018 | LjB07J24 | 1 | x3 | seed    | DF093192 |
|        |       | 2 |      | CM0018 | LjT45I08 | 1 | x3 | seed    | DF093192 |
| TM0691 | SSR   | 2 | 61.7 | CM0018 | LjT04L09 | 1 | x3 | seed    | DF093192 |
| TM0588 | SSR   | 2 | 61.7 | CM0018 | LjT01O03 | 3 | x5 | seed    | DF093192 |
| TM0587 | SSR   | 2 | 62.1 | CM0018 | LjT08P04 | 3 | x5 | seed    | DF093192 |
| TM0592 | SSR   | 2 | 62.1 | CM0018 | LjT41D19 | 3 | x5 | seed    | DF093192 |
| TM0796 | SSR   | 2 | 62.1 | CM0018 | LjT10F20 | 3 | x5 | seed    | DF093192 |
| TM0504 | SSR   | 2 | 62.9 | CM0504 | LjT31E24 | 1 | x3 | seed    | DF093438 |
| TM1649 | SSR   | 2 | 62.9 | CM0504 | LjT23I09 | 1 | x5 | seed    | DF093438 |
| TM0360 | SSR   | 2 | 62.9 | CM0360 | LjT31L13 | 3 | x5 | seed    | DF093401 |
|        |       | 2 |      | CM0360 | LjT35G04 | 1 | x3 | seed    | DF093401 |
|        |       | 2 |      | CM0346 | LjB14B15 | 1 | x3 | walking | DF093397 |
| TM0346 | dCAPS | 2 | 63.3 | CM0346 | LjT16J06 | 3 | x5 | seed    | DF093397 |
| TM0058 | dCAPS | 2 | 63.7 | CM0058 | LjT01K12 | 3 | x5 | seed    | DF093225 |

|        |     |   |      |        |          |   |    |         |          |
|--------|-----|---|------|--------|----------|---|----|---------|----------|
|        |     | 2 |      | CM0058 | LjT30C01 | 1 | x3 | walking | DF093225 |
| TM0526 | SSR | 2 | 63.7 | CM0058 | LjT09P04 | 1 | x3 | seed    | DF093225 |
|        |     | 2 |      | CM0058 | LjT16E09 | 1 | x3 | walking | DF093225 |
| TM0889 | SSR | 2 | 63.7 |        | LjT09A09 | 1 | x3 | seed    | AP010123 |
| TM0329 | SSR | 2 | 63.7 |        | LjT03F24 | 1 | x3 | seed    | AP009959 |
| TM1744 | SSR | 2 | 63.7 | CM0788 | LjT10O06 | 3 | x5 | seed    | DF093481 |
|        |     | 2 |      | CM0788 | LjT43A15 | 1 | x3 | seed    | DF093481 |
|        |     | 2 |      | CM0011 | LjT33N06 | 2 | x5 | seed    | DF093186 |
|        |     | 2 |      | CM0011 | LjT16J04 | 1 | x3 | walking | DF093186 |
| TM0011 | SSR | 2 | 65.3 | CM0011 | LjT12K07 | 3 | x5 | seed    | DF093186 |
|        |     | 2 |      | CM0011 | LjB09K11 | 1 | x3 | walking | DF093186 |
| TM0405 | SSR | 2 | 65.3 | CM0405 | LjT45O06 | 1 | x3 | seed    | DF093413 |
|        |     | 2 |      | CM0405 | LjT06A09 | 1 | x3 | walking | DF093413 |
| TM0417 | SSR | 2 | 66.1 |        | LjT13M01 | 1 | x3 | seed    | AP009971 |
|        |     | 2 |      | CM0002 | LjT31G14 | 1 | x3 | walking | DF093177 |
| TM0002 | SSR | 2 | 67.3 | CM0002 | LjT06K11 | 3 | x5 | seed    | DF093177 |
|        |     | 2 |      | CM0002 | LjT14P21 | 1 | x3 | walking | DF093177 |
| TM0204 | SSR | 2 | 67.3 | CM0002 | LjT39P22 | 3 | x5 | seed    | DF093177 |
| TM0313 | SSR | 2 | 67.3 | CM0002 | LjT45D08 | 3 | x5 | seed    | DF093177 |
| TM0871 | SSR | 2 | 67.3 |        | LjT46G02 | 1 | x3 | seed    | AP010117 |
|        |     | 2 |      | CM1032 | LjT05O03 | 1 | x3 | seed    | DF093504 |
| TM1032 | SSR | 2 | 67.3 | CM1032 | LjT37H21 | 3 | x5 | seed    | DF093504 |
|        |     | 2 |      | CM1032 | LjT44N22 | 3 | x5 | seed    | DF093504 |
|        |     | 2 |      | CM0826 | LjT23D07 | 3 | x5 | walking | DF093488 |
| TM0826 | SSR | 2 | 67.7 | CM0826 | LjT35G07 | 1 | x3 | seed    | DF093488 |

|        |       |   |      |        |           |   |    |         |                             |
|--------|-------|---|------|--------|-----------|---|----|---------|-----------------------------|
| TM1285 | SSR   | 2 | 67.7 |        | LjT24P12  | 1 | x3 | seed    | AP010178                    |
|        |       | 2 |      | CM0545 | LjB08D08  | 1 | x3 | walking | DF093444                    |
| TM0546 | SSR   | 2 | 68.1 | CM0545 | LjT02D13  | 3 | x5 | seed    | DF093444                    |
|        |       | 2 |      | CM0545 | LjT211O02 | 3 | x5 | seed    | DF093444                    |
| TM0545 | SSR   | 2 | 68.1 | CM0545 | LjT05B16  | 3 | x5 | seed    | DF093444                    |
| TM1679 | SSR   | 2 | 68.1 | CM0545 | LjT26K22  | 3 | x5 | walking | DF093444                    |
|        |       | 2 |      | CM0031 | LjB19D18  | 1 | x3 | walking | DF093203                    |
| TM0031 | dCAPS | 2 | 68.5 | CM0031 | LjT16N13  | 3 | x5 | seed    | DF093203                    |
|        |       | 2 |      | CM0308 | LjT26M19  | 1 | x3 | walking | DF093376                    |
| TM0308 | dCAPS | 2 | 69.3 | CM0308 | LjT15H15  | 3 | x5 | seed    | DF093376                    |
|        |       | 2 |      | CM0308 | LjT42O06  | 1 | x3 | walking | DF093376                    |
| TM0370 | SSR   | 2 | 69.3 |        | LjT04L10  | 3 | x5 | seed    | AP009671                    |
| TM1517 | SSR   | 2 | 69.3 |        | LjT36E17  | 1 | x3 | seed    | AP010209                    |
| BM2010 | SSR   | 2 | 69.3 |        | LjB15M17  | 3 | x5 | seed    | AP009645                    |
| TM0099 | SSR   | 2 | 69.5 | CM0099 | LjT01B10  | 3 | x5 | seed    | DF093254                    |
|        |       | 2 |      | CM0099 | LjT18D17  | 1 | x3 | walking | DF093254                    |
| TM0621 | SSR   | 2 | 69.7 |        | LjT02C03  | 1 | x3 | seed    | AP010026                    |
| TM1646 | SSR   | 2 | 70.5 |        | LjT02E02  | 1 | x3 | seed    | AP010240                    |
| TM1659 | SSR   | 2 | 70.5 |        | LjT42I05  | 1 | x3 | seed    | AP010245                    |
| TM1885 | SSR   | 2 | 70.5 |        | LjT42A12  | 3 | x5 | seed    | AP009748                    |
| TM0667 | SSR   | 2 | 71.3 |        | LjT03I05  | 3 | x5 | seed    | AP009833(a),<br>AP009834(b) |
| TM0512 | SSR   | 2 | 71.3 |        | LjT48A12  | 1 | x3 | seed    | AP010000                    |
|        |       | 2 |      | CM0210 | LjB21C16  | 3 | x5 | walking | DF093327                    |
| TM0210 | SSR   | 2 | 72.1 | CM0210 | LjT43I02  | 3 | x5 | seed    | DF093327                    |

|        |       |   |      |        |          |   |    |         |          |
|--------|-------|---|------|--------|----------|---|----|---------|----------|
|        |       | 2 |      | CM0210 | LjT13C09 | 1 | x3 | walking | DF093327 |
|        |       | 2 |      | CM0191 | LjT45D07 | 3 | x5 | seed    | DF093318 |
|        |       | 2 |      | CM0191 | LjT44M23 | 3 | x5 | walking | DF093318 |
|        |       | 2 |      | CM0191 | LjB12E22 | 3 | x5 | walking | DF093318 |
| TM0324 | SSR   | 2 | 72.5 | CM0191 | LjT38O12 | 3 | x5 | seed    | DF093318 |
|        |       | 2 |      | CM0191 | LjB13K21 | 3 | x5 | walking | DF093318 |
|        |       | 2 |      | CM0191 | LjT37A22 | 1 | x3 | seed    | DF093318 |
| TM0191 | SSR   | 2 | 72.5 | CM0191 | LjT21K08 | 3 | x5 | seed    | DF093318 |
| TM0380 | SSR   | 2 | 72.9 | CM0102 | LjT18K09 | 3 | x5 | seed    | DF093257 |
|        |       | 2 |      | CM0102 | LjT36K11 | 1 | x3 | seed    | DF093257 |
|        |       | 2 |      | CM0102 | LjB66E01 | 1 | x3 | walking | DF093257 |
| TM0102 | dCAPS | 2 | 72.9 | CM0102 | LjT08G20 | 3 | x5 | seed    | DF093257 |
|        |       | 2 |      | CM0102 | LjT42I06 | 1 | x3 | seed    | DF093257 |
| TM0793 | SSR   | 3 | 0.0  |        | LjT23O13 | 1 | x3 | seed    | AP010087 |
| TM0916 | SSR   | 3 | 0.4  |        | LjT34H24 | 1 | x3 | seed    | AP010130 |
| TM1924 | SSR   | 3 | 0.4  |        | LjT40P18 | 3 | x5 | seed    | AP009764 |
| TM1208 | SSR   | 3 | 1.6  | CM0253 | LjT23O04 | 1 | x3 | walking | DF093352 |
|        |       | 3 |      | CM0253 | LjT06I23 | 3 | x5 | seed    | DF093352 |
| BM1187 | SSR   | 3 | 2.4  | CM0253 | LjB72A14 | 1 | x3 | walking | DF093352 |
| TM0745 | SSR   | 3 | 2.4  |        | LjT07H20 | 1 | x3 | seed    | AP010071 |
|        |       | 3 |      | CM0106 | LjB07H05 | 1 | x3 | walking | DF093260 |
| TM0666 | SSR   | 3 | 5.3  | CM0106 | LjT15I02 | 3 | x5 | seed    | DF093260 |
|        |       | 3 |      | CM0106 | LjT42E24 | 1 | x3 | walking | DF093260 |
|        |       | 3 |      | CM0106 | LjT59K09 | 1 | x3 | walking | DF093260 |
| TM0106 | SSR   | 3 | 5.7  | CM0106 | LjT48I11 | 3 | x5 | seed    | DF093260 |

|        |     |   |      |        |          |   |    |         |              |
|--------|-----|---|------|--------|----------|---|----|---------|--------------|
| TM0576 | SSR | 3 | 5.7  |        | LjT02L14 | 1 | x3 | seed    | AP010017     |
|        |     | 3 |      | CM0176 | LjB21E20 | 3 | x3 | walking | DF093310     |
| TM0176 | SSR | 3 | 6.9  | CM0176 | LjT35C03 | 3 | x5 | seed    | DF093310     |
|        |     | 3 |      | CM0176 | LjT32J02 | 1 | x3 | walking | DF093310     |
|        |     | 3 |      | CM0059 | LjB03D19 | 1 | x3 | walking | DF093226     |
| TM0059 | SSR | 3 | 6.9  | CM0059 | LjT13M14 | 3 | x5 | seed    | DF093226     |
|        |     | 3 |      | CM0059 | LjT32D03 | 1 | x3 | walking | DF093226     |
|        |     | 3 |      | CM0282 | LjT48M13 | 1 | x3 | seed    | DF093363     |
| TM0340 | SSR | 3 | 7.7  | CM0282 | LjT31E21 | 3 | x5 | seed    | DF093363     |
|        |     | 3 |      | CM0282 | LjT27B17 | 1 | x5 | walking | DF093363     |
| TM0282 | SSR | 3 | 8.1  | CM0282 | LjT34M22 | 3 | x5 | seed    | DF093363     |
| BM1673 | SSR | 3 | 8.1  | CM0282 | LjB14E23 | 3 | x5 | walking | DF093363     |
|        |     | 3 |      | CM0282 | LjT02M11 | 3 | x5 | walking | DF093363     |
|        |     | 3 |      | CM0282 | LjT41F22 | 3 | x5 | walking | DF093363     |
|        |     | 3 |      | CM0282 | LjT18K24 | 3 | x5 | walking | DF093363     |
|        |     | 3 |      | CM0634 | LjT22B13 | 3 | x5 | walking | DF093460     |
| TM1715 | SSR | 3 | 9.7  | CM0634 | LjT20E20 | 3 | x5 | walking | DF093460     |
| BM1487 | SSR | 3 | 9.7  | CM0634 | LjB25F18 | 1 | x3 | walking | DF093460     |
|        |     | 3 |      | CM0634 | LjT39K19 | 1 | x3 | seed    | DF093460     |
| TM0704 | SSR | 3 | 9.7  | CM0634 | LjT06E12 | 3 | x5 | seed    | DF093460     |
|        |     | 3 |      | CM0634 | LjT03G11 | 3 | x5 | seed    | DF093460     |
|        |     | 3 |      | CM0634 | LjT37M22 | 1 | x3 | seed    | DF093460     |
| TM0634 | SSR | 3 | 10.1 | CM0634 | LjT13G15 | 3 | x3 | seed    | DF093460     |
| TM0365 | SSR | 3 | 10.5 |        | LjT46L11 | 3 | x5 | seed    | AP009669     |
| TM0436 | SSR | 3 | 10.5 |        | LjT13N17 | 3 | x5 | seed    | AP009825(a), |

|        |     |   |      |        |          |   |    |         |             |
|--------|-----|---|------|--------|----------|---|----|---------|-------------|
|        |     |   |      |        |          |   |    |         | AP009826(b) |
| TM0984 | SSR | 3 | 11.7 |        | LjT42M03 | 1 | x3 | seed    | AP010142    |
|        |     | 3 |      | CM0080 | LjT58P12 | 1 | x3 | walking | DF093243    |
| TM0080 | SSR | 3 | 12.5 | CM0080 | LjT14G02 | 3 | x5 | seed    | DF093243    |
| TM0513 | SSR | 3 | 12.5 | CM0080 | LjT30L04 | 1 | x5 | seed    | DF093243    |
| BM1753 | SSR | 3 | 12.9 | CM0574 | LjB24P16 | 3 | x5 | walking | DF093449    |
| TM0574 | SSR | 3 | 12.9 | CM0574 | LjT12B12 | 1 | x3 | seed    | DF093449    |
|        |     | 3 |      | CM0590 | LjB25M18 | 3 | x5 | walking | DF093452    |
|        |     | 3 |      | CM0590 | LjT05N10 | 3 | x5 | walking | DF093452    |
|        |     | 3 |      | CM0590 | LjT39P06 | 3 | x5 | walking | DF093452    |
|        |     | 3 |      | CM0590 | LjB15I03 | 3 | x5 | walking | DF093452    |
| TM1283 | SSR | 3 | 12.9 | CM0590 | LjT43F24 | 1 | x3 | seed    | DF093452    |
|        |     | 3 |      | CM0590 | LjT47I22 | 1 | x3 | walking | DF093452    |
| TM0590 | SSR | 3 | 13.3 | CM0590 | LjT09I23 | 3 | x5 | seed    | DF093452    |
|        |     | 3 |      | CM0590 | LjT02A12 | 1 | x3 | walking | DF093452    |
| TM0859 | SSR | 3 | 13.3 |        | LjT01D08 | 1 | x3 | seed    | AP010114    |
|        |     | 3 |      | CM0423 | LjT08P05 | 1 | x3 | seed    | DF093418    |
| TM1270 | SSR | 3 | 13.3 | CM0423 | LjT26F06 | 3 | x5 | seed    | DF093418    |
|        |     | 3 |      | CM0423 | LjT14H06 | 1 | x3 | walking | DF093418    |
|        |     | 3 |      | CM0423 | LjT17F04 | 3 | x5 | seed    | DF093418    |
| TM1185 | SSR | 3 | 13.3 | CM0241 | LjT30D02 | 1 | x3 | walking | DF093343    |
|        |     | 3 |      | CM0241 | LjB06P24 | 3 | x5 | seed    | DF093343    |
| BM1204 | SSR | 3 | 13.3 | CM0241 | LjB68K10 | 1 | x3 | seed    | DF093343    |
|        |     | 3 |      | CM0241 | LjT08O21 | 3 | x5 | seed    | DF093343    |
| BM0531 | SSR | 3 | 13.8 | CM0241 | LjB15I15 | 3 | x5 | seed    | DF093343    |

|        |       |   |      |        |          |   |    |         |          |
|--------|-------|---|------|--------|----------|---|----|---------|----------|
| TM0450 | SSR   | 3 | 15.3 |        | LjT26B16 | 1 | x3 | seed    | AP009983 |
| TM0996 | SSR   | 3 | 21.1 | CM0996 | LjT45D11 | 1 | x3 | walking | DF093503 |
|        |       | 3 |      | CM0996 | LjT25F10 | 3 | x5 | walking | DF093503 |
|        |       | 3 |      | CM0279 | LjT10L05 | 1 | x3 | walking | DF093361 |
| TM0279 | SSR   | 3 | 24.0 | CM0279 | LjT26P21 | 3 | x5 | seed    | DF093361 |
| TM0403 | SSR   | 3 | 24.0 | CM0279 | LjT17N21 | 3 | x5 | seed    | DF093361 |
|        |       | 3 |      | CM0279 | LjT13G10 | 1 | x3 | seed    | DF093361 |
| BM1543 | SSR   | 3 | 24.8 |        | LjB23H05 | 1 | x5 | seed    | AP009946 |
|        |       | 3 |      | CM0190 | LjT39K15 | 1 | x3 | walking | DF093317 |
| TM0190 | SSR   | 3 | 25.8 | CM0190 | LjT14C19 | 3 | x5 | seed    | DF093317 |
|        |       | 3 |      | CM0111 | LjB70H17 | 1 | x3 | walking | DF093263 |
| TM0111 | SSR   | 3 | 26.8 | CM0111 | LjT40O02 | 3 | x5 | seed    | DF093263 |
|        |       | 3 |      | CM0111 | LjB05K10 | 1 | x3 | walking | DF093263 |
| TM0538 | SSR   | 3 | 27.2 | CM0111 | LjT04D19 | 1 | x3 | seed    | DF093263 |
| TM0035 | SSR   | 3 | 28.8 |        | LjT10E18 | 3 | x5 | seed    | AP009649 |
| TM0070 | SSR   | 3 | 28.8 | CM0070 | LjT11L19 | 3 | x5 | seed    | DF093235 |
| TM0369 | SSR   | 3 | 29.2 | CM0070 | LjT30L06 | 3 | x5 | seed    | DF093235 |
| TM0426 | SSR   | 3 | 29.2 |        | LjT42K05 | 1 | x3 | seed    | AP009972 |
| TM1970 | SSR   | 3 | 30.0 |        | LjT23E22 | 2 | x5 | seed    | AP009887 |
| TM0196 | dCAPS | 3 | 30.8 | CM0196 | LjT45P14 | 3 | x5 | seed    | DF093322 |
| TM0198 | dCAPS | 3 | 31.2 | CM0196 | LjT43M15 | 3 | x5 | seed    | DF093322 |
|        |       | 3 |      | CM0196 | LjT62K10 | 1 | x3 | walking | DF093322 |
|        |       | 3 |      | CM0155 | LjT19K09 | 1 | x3 | walking | DF093295 |
| TM0155 | SSR   | 3 | 31.2 | CM0155 | LjT41A07 | 3 | x5 | seed    | DF093295 |
|        |       | 3 |      | CM0116 | LjT33K22 | 1 | x3 | walking | DF093268 |



|        |       |   |      |        |          |   |    |         |                             |
|--------|-------|---|------|--------|----------|---|----|---------|-----------------------------|
| TM0116 | dCAPS | 3 | 31.6 | CM0116 | LjT46B01 | 3 | x5 | seed    | DF093268                    |
|        |       | 3 |      | CM0116 | LjB06D13 | 1 | x3 | walking | DF093268                    |
| TM1465 | SSR   | 3 | 31.6 |        | LjT35O23 | 1 | x3 | seed    | AP010198                    |
| TM1089 | SSR   | 3 | 31.6 |        | LjT47G05 | 3 | x5 | seed    | AP009837(a),<br>AP009838(b) |
| TM0388 | SSR   | 3 | 32.0 |        | LjT14J20 | 3 | x5 | seed    | AP009823(a),<br>AP009824(b) |
| TM1587 | SSR   | 3 | 32.0 |        | LjT18H18 | 1 | x3 | seed    | AP010228                    |
| TM1548 | SSR   | 3 | 32.0 |        | LjT24D06 | 1 | x3 | seed    | AP010220                    |
| TM1907 | SSR   | 3 | 32.0 |        | LjT21L04 | 3 | x5 | seed    | AP009752                    |
|        |       | 3 |      | CM1220 | LjB26D22 | 3 | x5 | seed    | DF093510                    |
| TM1220 | SSR   | 3 | 32.0 | CM1220 | LjT25N08 | 1 | x3 | seed    | DF093510                    |
| TM1463 | SSR   | 3 | 32.0 |        | LjT04G21 | 1 | x3 | seed    | AP010197                    |
| TM0022 | SSR   | 3 | 32.0 |        | LjT11G09 | 3 | x5 | seed    | AP009648                    |
| TM0159 | SSR   | 3 | 32.8 |        | LjT09L18 | 3 | x5 | seed    | AP009656                    |
| TM0209 | dCAPS | 3 | 32.8 |        | LjT15N01 | 3 | x5 | seed    | AP009659                    |
| TM0782 | SSR   | 3 | 32.8 |        | LjT09M07 | 1 | x3 | seed    | AP010084                    |
| TM0619 | SSR   | 3 | 32.8 |        | LjT03D10 | 1 | x3 | seed    | AP010025                    |
| BM1720 | SSR   | 3 | 33.0 |        | LjB09K03 | 3 | x5 | seed    | AP009632                    |
| TM0978 | SSR   | 3 | 33.2 |        | LjT46J05 | 1 | x3 | seed    | AP010141                    |
| TM0568 | SSR   | 3 | 33.2 |        | LjT33P07 | 3 | x5 | seed    | AP009829(a),<br>AP009830(b) |
| TM0602 | SSR   | 3 | 33.2 | CM0602 | LjT31D07 | 3 | x5 | seed    | DF093457                    |
| TM0673 | SSR   | 3 | 33.2 | CM0602 | LjT11E06 | 3 | x5 | seed    | DF093457                    |
|        |       | 3 |      | CM0602 | LjB67K08 | 1 | x3 | walking | DF093457                    |
| TM0110 | SSR   | 3 | 33.2 | CM0110 | LjT40L13 | 3 | x5 | seed    | DF093262                    |

|        |       |   |      |        |           |   |    |         |          |
|--------|-------|---|------|--------|-----------|---|----|---------|----------|
|        |       | 3 |      | CM0110 | LjT23I13  | 2 | x3 | walking | DF093262 |
| TM1675 | SSR   | 3 | 33.2 | CM0110 | LjT38P03  | 1 | x3 | seed    | DF093262 |
| TM1676 | SSR   | 3 | 33.2 | CM0110 | LjT06K13  | 1 | x3 | seed    | DF093262 |
| TM0585 | dCAPS | 3 | 33.6 |        | LjT40O07  | 3 | x5 | seed    | AP009678 |
| BM1682 | SSR   | 3 | 33.6 | CM0005 | LjB16H07  | 1 | x3 | walking | DF093180 |
|        |       | 3 |      | CM0005 | LjT02H21  | 1 | x3 | walking | DF093180 |
| TM0672 | SSR   | 3 | 33.6 | CM0005 | LjT33A07  | 3 | x5 | seed    | DF093180 |
| TM0005 | SSR   | 3 | 34.0 | CM0005 | LjT15H09  | 3 | x5 | seed    | DF093180 |
| BM1669 | SSR   | 3 | 34.0 | CM0005 | LjB21P22  | 3 | x5 | seed    | DF093180 |
|        |       | 3 |      | CM0005 | LjT47I17  | 1 | x5 | seed    | DF093180 |
|        |       | 3 |      | CM0690 | LjT44C14  | 1 | x3 | walking | DF093469 |
| TM0690 | SSR   | 3 | 34.0 | CM0690 | LjT11M02  | 3 | x5 | seed    | DF093469 |
|        |       | 3 |      | CM0690 | LjT11N13  | 1 | x3 | walking | DF093469 |
| TM0907 | SSR   | 3 | 34.0 |        | LjT14G01  | 1 | x3 | seed    | AP010127 |
| TM1367 | SSR   | 3 | 34.0 |        | LjT48P15  | 3 | x5 | seed    | AP009688 |
| TM0707 | SSR   | 3 | 36.0 |        | LjT02C24  | 1 | x3 | seed    | AP010056 |
|        |       | 3 |      | CM0047 | LjB69N03  | 1 | x5 | walking | DF093216 |
| TM0083 | SSR   | 3 | 36.8 | CM0047 | LjT06J16  | 3 | x5 | seed    | DF093216 |
| TM0047 | dCAPS | 3 | 36.8 | CM0047 | LjT01P23  | 3 | x5 | seed    | DF093216 |
|        |       | 3 |      | CM0047 | LjT43K04  | 1 | x3 | walking | DF093216 |
| TM0129 | SSR   | 3 | 37.6 | CM0129 | LjT34A24  | 3 | x5 | seed    | DF093280 |
|        |       | 3 |      | CM0129 | LjT17L01  | 1 | x3 | walking | DF093280 |
| TM0604 | SSR   | 3 | 37.6 | CM0129 | LjT38D05  | 1 | x3 | seed    | DF093280 |
| TM1658 | dCAPS | 3 | 38.4 | CM0292 | LjT11L01  | 3 | x5 | seed    | DF093368 |
|        |       | 3 |      | CM0292 | LjT138B03 | 3 | x5 | walking | DF093368 |

|        |       |   |      |        |           |   |    |         |          |
|--------|-------|---|------|--------|-----------|---|----|---------|----------|
|        |       | 3 |      | CM0292 | LjB16L08  | 1 | x5 | walking | DF093368 |
| TM0293 | dCAPS | 3 | 39.2 | CM0292 | LjT07E09  | 3 | x5 | seed    | DF093368 |
| TM0292 | dCAPS | 3 | 39.2 | CM0292 | LjT03N08  | 3 | x5 | seed    | DF093368 |
| TM1250 | SSR   | 3 | 39.2 |        | LjT58I15  | 1 | x3 | seed    | AP010173 |
| TM0452 | SSR   | 3 | 40.0 | CM0452 | LjT37D12  | 1 | x3 | seed    | DF093425 |
|        |       | 3 |      | CM0452 | LjT03B09  | 1 | x3 | seed    | DF093425 |
| TM1822 | SSR   | 3 | 40.8 |        | LjT34E16  | 3 | x5 | seed    | AP009717 |
|        |       | 3 |      | CM0142 | LjB140N13 | 1 | x3 | walking | DF093288 |
| TM0142 | SSR   | 3 | 40.8 | CM0142 | LjT48D11  | 3 | x5 | seed    | DF093288 |
|        |       | 3 |      | CM0142 | LjT05E13  | 1 | x3 | walking | DF093288 |
|        |       | 3 |      | CM0226 | LjT43K13  | 1 | x3 | seed    | DF093335 |
| TM0226 | SSR   | 3 | 41.6 | CM0226 | LjT36O13  | 3 | x5 | seed    | DF093335 |
|        |       | 3 |      | CM0226 | LjT32O12  | 3 | x5 | walking | DF093335 |
| TM0820 | SSR   | 3 | 42.0 | CM0726 | LjT46K03  | 1 | x3 | seed    | DF093475 |
| TM0726 | SSR   | 3 | 42.0 | CM0726 | LjT33I01  | 1 | x3 | seed    | DF093475 |
|        |       | 3 |      | CM0246 | LjT48E11  | 1 | x3 | walking | DF093347 |
| TM0246 | SSR   | 3 | 42.0 | CM0246 | LjT34I09  | 3 | x5 | seed    | DF093347 |
| TM0213 | SSR   | 3 | 44.4 | CM0213 | LjT36M08  | 3 | x5 | seed    | DF093329 |
|        |       | 3 |      | CM0213 | LjT07L21  | 1 | x3 | seed    | DF093329 |
| TM1468 | SSR   | 3 | 47.8 | CM1468 | LjT48C20  | 1 | x3 | seed    | DF093517 |
| TM1648 | SSR   | 3 | 48.2 | CM1468 | LjT02E20  | 1 | x3 | seed    | DF093517 |
|        |       | 3 |      | CM0406 | LjB10A22  | 1 | x3 | walking | DF093414 |
| TM0406 | SSR   | 3 | 49.4 | CM0406 | LjT24C17  | 1 | x3 | seed    | DF093414 |
|        |       | 3 |      | CM0208 | LjT11A16  | 1 | x3 | seed    | DF093326 |
| TM0208 | SSR   | 3 | 52.7 | CM0208 | LjT47I16  | 3 | x5 | seed    | DF093326 |

|        |     |   |      |        |          |   |    |         |          |
|--------|-----|---|------|--------|----------|---|----|---------|----------|
|        |     | 3 |      | CM0208 | LjT06I06 | 1 | x3 | seed    | DF093326 |
| TM0416 | SSR | 3 | 53.9 |        | LjT15F18 | 1 | x3 | seed    | AP009970 |
| TM0724 | SSR | 3 | 54.7 | CM0724 | LjT02G14 | 1 | x3 | seed    | DF093474 |
|        |     | 3 |      | CM0724 | LjB24E23 | 1 | x3 | walking | DF093474 |
|        |     | 3 |      | CM0115 | LjB03J23 | 1 | x3 | walking | DF093267 |
| TM0115 | SSR | 3 | 54.7 | CM0115 | LjT38E13 | 3 | x5 | seed    | DF093267 |
|        |     | 3 |      | CM0049 | LjB22J21 | 1 | x3 | walking | DF093218 |
| TM0049 | SSR | 3 | 55.1 | CM0049 | LjT17K09 | 3 | x5 | seed    | DF093218 |
|        |     | 3 |      | CM0355 | LjT42E17 | 3 | x5 | walking | DF093398 |
|        |     | 3 |      | CM0355 | LjT15F02 | 1 | x3 | seed    | DF093398 |
| BM1881 | SSR | 3 | 56.2 | CM0355 | LjB19K14 | 3 | x5 | seed    | DF093398 |
| TM1570 | SSR | 3 | 56.7 | CM1570 | LjT05I24 | 1 | x3 | seed    | DF093520 |
|        |     | 3 |      | CM1570 | LjT22C05 | 3 | x5 | seed    | DF093520 |
| TM1871 | SSR | 3 | 57.5 |        | LjT36L08 | 3 | x5 | seed    | AP009741 |
|        |     | 3 |      | CM0711 | LjT56J20 | 1 | x3 | walking | DF093473 |
| TM0948 | SSR | 3 | 58.3 | CM0711 | LjT02C15 | 3 | x5 | seed    | DF093473 |
| TM0711 | SSR | 3 | 59.1 | CM0711 | LjT42D01 | 1 | x3 | seed    | DF093473 |
|        |     | 3 |      | CM0160 | LjB25B09 | 3 | x5 | walking | DF093297 |
|        |     | 3 |      | CM0160 | LjB05A24 | 3 | x5 | walking | DF093297 |
|        |     | 3 |      | CM0160 | LjB13M20 | 3 | x5 | walking | DF093297 |
|        |     | 3 |      | CM0160 | LjT29I08 | 3 | x5 | walking | DF093297 |
| TM0702 | SSR | 3 | 59.9 | CM0160 | LjT14C14 | 1 | x3 | seed    | DF093297 |
|        |     | 3 |      | CM0160 | LjT11B06 | 1 | x3 | walking | DF093297 |
| TM0160 | SSR | 3 | 60.7 | CM0160 | LjT12A10 | 3 | x5 | seed    | DF093297 |
| TM0468 | SSR | 3 | 63.6 | CM0468 | LjT38N14 | 1 | x3 | seed    | DF093431 |

|        |       |   |      |        |          |   |    |         |          |
|--------|-------|---|------|--------|----------|---|----|---------|----------|
| TM1420 | SSR   | 3 | 64.0 | CM0468 | LjT39M15 | 1 | x3 | seed    | DF093431 |
| TM1899 | SSR   | 3 | 64.0 |        | LjT47O18 | 3 | x5 | seed    | AP009750 |
| TM0203 | SSR   | 3 | 64.8 | CM0152 | LjT45C16 | 3 | x5 | seed    | DF093293 |
|        |       | 3 |      | CM0152 | LjB03I06 | 1 | x3 | walking | DF093293 |
| TM0152 | dCAPS | 3 | 65.2 | CM0152 | LjT38N11 | 3 | x5 | seed    | DF093293 |
|        |       | 3 |      | CM0152 | LjT14A24 | 1 | x3 | seed    | DF093293 |
|        |       | 3 |      | CM0243 | LjT23L17 | 1 | x3 | walking | DF093344 |
| TM0243 | SSR   | 3 | 65.6 | CM0243 | LjT02A16 | 3 | x5 | seed    | DF093344 |
|        |       | 3 |      | CM0243 | LjT21A07 | 3 | x5 | seed    | DF093344 |
| TM0164 | SSR   | 3 | 66.4 | CM0164 | LjT04B20 | 1 | x5 | seed    | DF093300 |
|        |       | 3 |      | CM0164 | LjT48I02 | 1 | x3 | seed    | DF093300 |
| TM1144 | SSR   | 3 | 67.6 | CM1144 | LjT18I21 | 3 | x5 | seed    | DF093508 |
|        |       | 3 |      | CM1144 | LjT22O15 | 2 | x5 | seed    | DF093508 |
| TM0701 | SSR   | 3 | 67.6 | CM0396 | LjT04F17 | 3 | x5 | seed    | DF093410 |
|        |       | 3 |      | CM0396 | LjT10P11 | 1 | x5 | seed    | DF093410 |
| TM1812 | SSR   | 3 | 67.6 | CM0396 | LjT31C02 | 3 | x5 | seed    | DF093410 |
| TM1402 | SSR   | 3 | 67.6 | CM0396 | LjT15E16 | 1 | x3 | walking | DF093410 |
|        |       | 3 |      | CM0396 | LjT39B20 | 1 | x3 | seed    | DF093410 |
|        |       | 3 |      | CM0396 | LjT06M13 | 1 | x3 | walking | DF093410 |
| TM1002 | SSR   | 3 | 68.0 | CM0396 | LjT04O19 | 3 | x5 | seed    | DF093410 |
| TM0649 | SSR   | 3 | 69.2 |        | LjT44N20 | 1 | x3 | seed    | AP010039 |
| TM0616 | SSR   | 3 | 70.4 |        | LjT05P05 | 1 | x3 | seed    | AP010024 |
| TM0730 | SSR   | 3 | 70.4 |        | LjT33O20 | 1 | x3 | seed    | AP010066 |
| TM0786 | SSR   | 3 | 70.4 |        | LjT39G24 | 1 | x3 | seed    | AP010085 |
| TM0136 | dCAPS | 3 | 70.9 | CM0136 | LjT21I12 | 3 | x5 | seed    | DF093284 |

|        |       |   |      |        |          |   |    |         |          |
|--------|-------|---|------|--------|----------|---|----|---------|----------|
|        |       | 3 |      | CM0136 | LjT09B19 | 2 | x5 | walking | DF093284 |
| TM1053 | SSR   | 3 | 72.4 | CM0792 | LjT04H14 | 1 | x3 | seed    | DF093482 |
| TM1424 | SSR   | 3 | 72.6 | CM0792 | LjT42K10 | 1 | x3 | walking | DF093482 |
|        |       | 3 |      | CM0792 | LjT23O15 | 1 | x3 | walking | DF093482 |
| TM0506 | SSR   | 3 | 72.8 |        | LjT37F23 | 1 | x3 | seed    | AP009996 |
| TM1768 | SSR   | 3 | 74.0 |        | LjT23H01 | 3 | x5 | seed    | AP009710 |
| TM1222 | SSR   | 3 | 74.0 |        | LjT29G18 | 1 | x3 | seed    | AP010168 |
|        |       | 3 |      | CM0091 | LjT42G23 | 3 | x5 | walking | DF093249 |
| TM0091 | SSR   | 3 | 74.8 | CM0091 | LjT07I01 | 3 | x5 | seed    | DF093249 |
|        |       | 3 |      | CM0091 | LjT27C23 | 3 | x5 | walking | DF093249 |
|        |       | 3 |      | CM0091 | LjT20I08 | 1 | x3 | walking | DF093249 |
| TM0217 | SSR   | 3 | 74.8 | CM0091 | LjT09C16 | 3 | x5 | seed    | DF093249 |
| TM0527 | SSR   | 3 | 75.6 | CM0091 | LjT03B23 | 1 | x3 | seed    | DF093249 |
|        |       | 3 |      | CM0216 | LjT44D07 | 1 | x3 | seed    | DF093331 |
| TM0268 | SSR   | 3 | 75.6 | CM0216 | LjT34K09 | 3 | x5 | seed    | DF093331 |
| TM0258 | SSR   | 3 | 75.6 | CM0216 | LjT09E01 | 3 | x5 | seed    | DF093331 |
|        |       | 3 |      | CM0216 | LjT18B05 | 3 | x5 | seed    | DF093331 |
| TM0216 | SSR   | 3 | 75.6 | CM0216 | LjT25N16 | 3 | x5 | seed    | DF093331 |
|        |       | 3 |      | CM0216 | LjT15M04 | 1 | x3 | walking | DF093331 |
|        |       | 3 |      | CM0216 | LjT35B05 | 1 | x3 | walking | DF093331 |
| TM0112 | dCAPS | 3 | 77.2 | CM0112 | LjT46K10 | 3 | x5 | seed    | DF093264 |
|        |       | 3 |      | CM0112 | LjT46E05 | 1 | x3 | walking | DF093264 |
| TM0135 | SSR   | 3 | 78.4 | CM0135 | LjT20B10 | 3 | x5 | seed    | DF093283 |
|        |       | 3 |      | CM0135 | LjB09C10 | 1 | x3 | walking | DF093283 |
|        |       | 3 |      | CM0460 | LjT04C21 | 3 | x5 | walking | DF093429 |

|        |     |   |      |        |          |   |    |         |                             |
|--------|-----|---|------|--------|----------|---|----|---------|-----------------------------|
|        |     | 3 |      | CM0460 | LjT07O23 | 1 | x3 | seed    | DF093429                    |
| TM0460 | SSR | 3 | 80.0 | CM0460 | LjT12O20 | 1 | x3 | seed    | DF093429                    |
| TM0407 | SSR | 3 | 81.6 |        | LjT33M17 | 1 | x3 | seed    | AP009965                    |
| TM1820 | SSR | 3 | 81.6 | CM0127 | LjT01J15 | 3 | x5 | walking | DF093278                    |
| TM1419 | SSR | 3 | 81.6 | CM0127 | LjT43H12 | 3 | x3 | seed    | DF093278                    |
| TM1821 | SSR | 3 | 82.0 | CM0127 | LjT05L20 | 3 | x5 | walking | DF093278                    |
| TM1917 | SSR | 3 | 82.0 | CM0127 | LjT38M18 | 3 | x5 | walking | DF093278                    |
|        |     | 3 |      | CM0127 | LjT30G11 | 3 | x3 | seed    | DF093278                    |
| TM0127 | SSR | 3 | 82.4 | CM0127 | LjT44D21 | 3 | x5 | seed    | DF093278                    |
|        |     | 3 |      | CM0127 | LjB18N14 | 1 | x3 | walking | DF093278                    |
| TM1819 | SSR | 3 | 82.8 | CM0127 | LjT33C21 | 3 | x5 | walking | DF093278                    |
| TM1437 | SSR | 3 | 83.2 |        | LjT40N08 | 1 | x3 | seed    | AP010190                    |
|        |     | 3 |      | CM0261 | LjT22I03 | 1 | x3 | walking | DF093355                    |
| TM0261 | SSR | 3 | 83.2 | CM0261 | LjT23P21 | 3 | x5 | seed    | DF093355                    |
|        |     | 3 |      | CM0261 | LjT62K04 | 1 | x3 | walking | DF093355                    |
| TM0797 | SSR | 3 | 84.0 |        | LjT39D18 | 1 | x3 | seed    | AP010089                    |
| TM0525 | SSR | 4 | 0.0  | CM0525 | LjT46D13 | 1 | x3 | seed    | DF093439                    |
| TM0869 | SSR | 4 | 0.4  | CM0525 | LjT35A11 | 1 | x3 | walking | DF093439                    |
| TM1203 | SSR | 4 | 0.4  |        | LjT24N17 | 3 | x5 | seed    | AP009839(a),<br>AP009840(b) |
| TM0529 | SSR | 4 | 0.8  |        | LjT03F09 | 1 | x3 | seed    | AP010003                    |
| TM0654 | SSR | 4 | 1.6  | CM0288 | LjT42B20 | 1 | x3 | seed    | DF093366                    |
| TM0841 | SSR | 4 | 1.6  | CM0288 | LjT19L11 | 1 | x3 | seed    | DF093366                    |
|        |     | 4 |      | CM0288 | LjT31P09 | 3 | x5 | walking | DF093366                    |
| TM0288 | SSR | 4 | 2.0  | CM0288 | LjT36E18 | 3 | x5 | seed    | DF093366                    |

|        |       |   |     |        |           |   |    |         |          |
|--------|-------|---|-----|--------|-----------|---|----|---------|----------|
| TM0353 | SSR   | 4 | 2.0 | CM0288 | LjT39G20  | 3 | x5 | seed    | DF093366 |
|        |       | 4 |     | CM0288 | LjT02O22  | 1 | x3 | walking | DF093366 |
|        |       | 4 |     | CM0026 | LjB72C18  | 1 | x3 | walking | DF093199 |
| TM0026 | dCAPS | 4 | 2.8 | CM0026 | LjT09I17  | 3 | x5 | seed    | DF093199 |
|        |       | 4 |     | CM0026 | LjB70G09  | 1 | x3 | walking | DF093199 |
| TM1536 | SSR   | 4 | 3.2 | CM1334 | LjT31E01  | 3 | x5 | seed    | DF093513 |
| TM1334 | SSR   | 4 | 4.0 | CM1334 | LjT20N14  | 3 | x5 | seed    | DF093513 |
| BM1232 | SSR   | 4 | 4.0 | CM0256 | LjB07M17  | 1 | x3 | walking | DF093353 |
|        |       | 4 |     | CM0256 | LjT14P17  | 1 | x3 | seed    | DF093353 |
| TM0256 | SSR   | 4 | 5.6 | CM0256 | LjT07D18  | 3 | x5 | seed    | DF093353 |
| TM1170 | SSR   | 4 | 6.8 | CM0007 | LjT11M06  | 1 | x3 | seed    | DF093182 |
| TM1717 | SSR   | 4 | 6.8 | CM0007 | LjT09C19  | 3 | x5 | seed    | DF093182 |
| TM0265 | SSR   | 4 | 7.6 | CM0007 | LjT09E08  | 3 | x5 | seed    | DF093182 |
|        |       | 4 |     | CM0007 | LjB01K01  | 1 | x3 | walking | DF093182 |
| TM0719 | SSR   | 4 | 8.0 | CM0007 | LjT20D24  | 1 | x3 | seed    | DF093182 |
| TM0007 | dCAPS | 4 | 8.4 | CM0007 | LjT10J15  | 3 | x5 | seed    | DF093182 |
|        |       | 4 |     | CM0007 | LjB69I05  | 1 | x3 | walking | DF093182 |
| TM0530 | SSR   | 4 | 8.4 | CM0337 | LjT30I15  | 1 | x3 | seed    | DF093392 |
| TM0337 | SSR   | 4 | 8.4 | CM0337 | LjT05L17  | 3 | x5 | seed    | DF093392 |
|        |       | 4 |     | CM0337 | LjT119A16 | 3 | x5 | walking | DF093392 |
|        |       | 4 |     | CM0337 | LjB23J17  | 3 | x5 | walking | DF093392 |
|        |       | 4 |     | CM0337 | LjT41G07  | 3 | x5 | walking | DF093392 |
| TM1779 | SSR   | 4 | 8.4 | CM0337 | LjT16M14  | 3 | x5 | seed    | DF093392 |
| TM1600 | SSR   | 4 | 8.4 | CM0337 | LjT31F09  | 1 | x3 | seed    | DF093392 |
| TM0708 | SSR   | 4 | 8.8 | CM0182 | LjT27D17  | 1 | x3 | seed    | DF093316 |



|        |       |   |      |        |           |   |    |         |          |
|--------|-------|---|------|--------|-----------|---|----|---------|----------|
|        |       | 4 |      | CM0182 | LjT20B08  | 3 | x5 | walking | DF093316 |
| TM0182 | SSR   | 4 | 8.8  | CM0182 | LjT16B11  | 3 | x5 | seed    | DF093316 |
|        |       | 4 |      | CM0182 | LjB10F10  | 3 | x5 | walking | DF093316 |
| TM0100 | SSR   | 4 | 8.8  | CM0100 | LjT36C13  | 3 | x5 | seed    | DF093255 |
|        |       | 4 |      | CM0100 | LjT46I20  | 1 | x3 | seed    | DF093255 |
|        |       | 4 |      | CM0100 | LjT08P14  | 1 | x3 | walking | DF093255 |
|        |       | 4 |      | CM0100 | LjT13B11  | 1 | x3 | seed    | DF093255 |
| TM0832 | SSR   | 4 | 9.6  | CM0832 | LjT47B07  | 1 | x3 | seed    | DF093490 |
| TM1074 | SSR   | 4 | 9.6  | CM0832 | LjT44J22  | 2 | x3 | seed    | DF093490 |
| TM1713 | SSR   | 4 | 9.6  | CM1616 | LjT16G09  | 3 | x5 | seed    | DF093524 |
| TM1616 | SSR   | 4 | 9.6  | CM1616 | LjT03A02  | 3 | x5 | seed    | DF093524 |
| TM0692 | SSR   | 4 | 11.6 | CM0692 | LjT04D06  | 1 | x3 | seed    | DF093470 |
|        |       | 4 |      | CM0692 | LjT46B17  | 3 | x5 | walking | DF093470 |
|        |       | 4 |      | CM0692 | LjB21M16  | 1 | x3 | walking | DF093470 |
|        |       | 4 |      | CM0692 | LjT30M19  | 1 | x3 | seed    | DF093470 |
| TM1708 | SSR   | 4 | 12.4 |        | LjT233I03 | 2 | x3 | seed    | AP009874 |
| TM0432 | SSR   | 4 | 12.4 | CM0432 | LjT09M24  | 1 | x3 | seed    | DF093420 |
|        |       | 4 |      | CM0432 | LjT46B12  | 1 | x3 | walking | DF093420 |
|        |       | 4 |      | CM0432 | LjT30M02  | 1 | x3 | seed    | DF093420 |
|        |       | 4 |      | CM0079 | LjT12E07  | 1 | x3 | walking | DF093242 |
| TM0079 | dCAPS | 4 | 13.6 | CM0079 | LjT13P22  | 3 | x5 | seed    | DF093242 |
|        |       | 4 |      | CM0079 | LjT28E12  | 1 | x3 | walking | DF093242 |
| BM1279 | SSR   | 4 | 14.0 | CM0227 | LjB21D13  | 1 | x3 | walking | DF093336 |
|        |       | 4 |      | CM0227 | LjT46M07  | 1 | x3 | walking | DF093336 |
| TM0227 | SSR   | 4 | 14.0 | CM0227 | LjT01O24  | 3 | x5 | seed    | DF093336 |

|        |       |   |      |        |          |   |    |         |          |
|--------|-------|---|------|--------|----------|---|----|---------|----------|
| TM1846 | SSR   | 4 | 14.4 | CM0227 | LjT02L05 | 3 | x5 | seed    | DF093336 |
|        |       | 4 |      | CM0227 | LjT34M17 | 3 | x5 | walking | DF093336 |
|        |       | 4 |      | CM0227 | LjB08D05 | 3 | x5 | walking | DF093336 |
|        |       | 4 |      | CM0227 | LjT04J20 | 1 | x3 | seed    | DF093336 |
|        |       | 4 |      | CM0229 | LjB13B18 | 3 | x3 | walking | DF093337 |
| TM0229 | SSR   | 4 | 14.8 | CM0229 | LjT28E04 | 3 | x5 | seed    | DF093337 |
| BM1979 | SSR   | 4 | 14.8 | CM0229 | LjB07N07 | 3 | x5 | walking | DF093337 |
|        |       | 4 |      | CM0229 | LjT10H08 | 3 | x5 | walking | DF093337 |
| TM1309 | SSR   | 4 | 14.8 | CM0229 | LjT05H14 | 1 | x3 | seed    | DF093337 |
|        |       | 4 |      | CM0229 | LjT45B04 | 3 | x5 | walking | DF093337 |
| TM0075 | SSR   | 4 | 14.8 | CM0075 | LjT16A13 | 3 | x5 | seed    | DF093239 |
|        |       | 4 |      | CM0075 | LjB18N06 | 1 | x3 | walking | DF093239 |
| TM0347 | SSR   | 4 | 15.6 | CM0128 | LjT10F06 | 3 | x5 | seed    | DF093279 |
| TM0330 | SSR   | 4 | 16.0 | CM0128 | LjT14C18 | 3 | x5 | seed    | DF093279 |
| TM0128 | SSR   | 4 | 16.0 | CM0128 | LjT28L24 | 3 | x5 | seed    | DF093279 |
|        |       | 4 |      | CM0128 | LjT61N09 | 1 | x3 | walking | DF093279 |
| TM0157 | dCAPS | 4 | 16.0 | CM0128 | LjT21D16 | 3 | x5 | seed    | DF093279 |
|        |       | 4 |      | CM0536 | LjT30P13 | 1 | x3 | seed    | DF093441 |
| TM1870 | SSR   | 4 | 16.6 | CM0536 | LjT09M02 | 3 | x5 | seed    | DF093441 |
| TM1335 | SSR   | 4 | 16.8 |        | LjT45J24 | 3 | x5 | seed    | AP009687 |
| TM0194 | SSR   | 4 | 19.3 | CM0194 | LjT11O06 | 3 | x5 | seed    | DF093320 |
|        |       | 4 |      | CM0194 | LjB23E08 | 1 | x3 | walking | DF093320 |
|        |       | 4 |      | CM0659 | LjT04J13 | 1 | x3 | seed    | DF093463 |
| TM1427 | SSR   | 4 | 19.3 | CM0659 | LjT05E03 | 1 | x3 | walking | DF093463 |
|        |       | 4 |      | CM0659 | LjT06G24 | 1 | x3 | walking | DF093463 |

|        |       |   |      |        |          |   |    |         |                             |
|--------|-------|---|------|--------|----------|---|----|---------|-----------------------------|
|        |       | 4 |      | CM0165 | LjT14P18 | 1 | x3 | walking | DF093301                    |
|        |       | 4 |      | CM0165 | LjT12O03 | 1 | x3 | walking | DF093301                    |
| TM0165 | dCAPS | 4 | 20.1 | CM0165 | LjT05F06 | 3 | x5 | seed    | DF093301                    |
|        |       | 4 |      | CM0165 | LjT39H21 | 1 | x3 | walking | DF093301                    |
| TM0283 | SSR   | 4 | 20.5 | CM0283 | LjT18E13 | 3 | x5 | seed    | DF093364                    |
| TM1581 | SSR   | 4 | 20.5 | CM0283 | LjT21C10 | 1 | x3 | walking | DF093364                    |
| TM0212 | SSR   | 4 | 20.9 | CM0131 | LjT20N03 | 3 | x5 | seed    | DF093281                    |
|        |       | 4 |      | CM0131 | LjT09M05 | 1 | x3 | walking | DF093281                    |
|        |       | 4 |      | CM0131 | LjB12M18 | 1 | x3 | walking | DF093281                    |
| TM0131 | SSR   | 4 | 21.3 | CM0131 | LjT21G09 | 3 | x5 | seed    | DF093281                    |
|        |       | 4 |      | CM0119 | LjT37I04 | 1 | x3 | walking | DF093270                    |
| TM0119 | SSR   | 4 | 21.3 | CM0119 | LjT34D11 | 3 | x5 | seed    | DF093270                    |
| TM0197 | SSR   | 4 | 21.3 | CM0119 | LjT45A24 | 3 | x5 | seed    | DF093270                    |
|        |       | 4 |      | CM0119 | LjB05I10 | 1 | x3 | walking | DF093270                    |
|        |       | 4 |      | CM0247 | LjT18B07 | 1 | x3 | walking | DF093348                    |
| TM0247 | SSR   | 4 | 24.2 | CM0247 | LjT01N13 | 3 | x5 | seed    | DF093348                    |
| TM0296 | SSR   | 4 | 24.2 |        | LjT08E06 | 3 | x5 | seed    | AP009811(a),<br>AP009812(b) |
| TM0570 | SSR   | 4 | 24.2 |        | LjT10E08 | 3 | x5 | seed    | AP009677                    |
| TM0831 | SSR   | 4 | 24.2 | CM0831 | LjT09E17 | 1 | x3 | seed    | DF093489                    |
|        |       | 4 |      | CM0831 | LjT44O17 | 1 | x3 | seed    | DF093489                    |
| TM0677 | SSR   | 4 | 24.2 |        | LjT21A22 | 1 | x3 | seed    | AP010045                    |
| TM1251 | dCAPS | 4 | 24.4 | CM0161 | LjT06J02 | 1 | x3 | walking | DF093298                    |
|        |       | 4 |      | CM0161 | LjT22D23 | 3 | x5 | seed    | DF093298                    |
| TM0161 | dCAPS | 4 | 24.4 | CM0161 | LjT35D23 | 1 | x5 | seed    | DF093298                    |

|        |       |   |      |        |           |   |    |         |          |
|--------|-------|---|------|--------|-----------|---|----|---------|----------|
|        |       | 4 |      | CM0281 | LjB10A06  | 1 | x3 | walking | DF093362 |
| TM0281 | SSR   | 4 | 24.6 | CM0281 | LjT22I23  | 3 | x5 | seed    | DF093362 |
|        |       | 4 |      | CM0281 | LjT08A19  | 3 | x3 | walking | DF093362 |
| TM1642 | SSR   | 4 | 24.6 |        | LjT04K15  | 1 | x3 | seed    | AP010238 |
| TM0851 | SSR   | 4 | 24.6 |        | LjT38A20  | 1 | x3 | seed    | AP010110 |
| BM1376 | SSR   | 4 | 25.0 |        | LjB20H09  | 3 | x5 | seed    | AP009626 |
|        |       | 4 |      | CM0126 | LjB09G03  | 1 | x3 | walking | DF093277 |
| TM0126 | SSR   | 4 | 25.0 | CM0126 | LjT31E04  | 3 | x5 | seed    | DF093277 |
|        |       | 4 |      | CM0126 | LjB15F18  | 1 | x3 | walking | DF093277 |
|        |       | 4 |      | CM0126 | LjB20H13  | 3 | x5 | walking | DF093277 |
| TM1693 | SSR   | 4 | 25.4 | CM0126 | LjT05K12  | 3 | x5 | walking | DF093277 |
| TM1734 | SSR   | 4 | 25.4 | CM0126 | LjT11L10  | 3 | x5 | walking | DF093277 |
|        |       | 4 |      | CM0126 | LjT34M05  | 2 | x5 | walking | DF093277 |
|        |       | 4 |      | CM0126 | LjB25P16  | 3 | x5 | walking | DF093277 |
|        |       | 4 |      | CM0126 | LjT07P19  | 3 | x3 | seed    | DF093277 |
|        |       | 4 |      | CM0126 | LjT17O03  | 3 | x5 | walking | DF093277 |
|        |       | 4 |      | CM0126 | LjB372N22 | 3 | x5 | walking | DF093277 |
|        |       | 4 |      | CM0126 | LjT15P01  | 3 | x5 | walking | DF093277 |
|        |       | 4 |      | CM0126 | LjB09F11  | 3 | x5 | walking | DF093277 |
|        |       | 4 |      | CM0126 | LjT41L19  | 3 | x5 | walking | DF093277 |
| BM1082 | dCAPS | 4 | 25.8 | CM0173 | LjB06M21  | 1 | x3 | walking | DF093307 |
| TM0173 | SSR   | 4 | 25.8 | CM0173 | LjT10G09  | 3 | x5 | seed    | DF093307 |
| BM1727 | SSR   | 4 | 25.8 | CM0173 | LjB356P07 | 3 | x5 | walking | DF093307 |
| TM0172 | SSR   | 4 | 26.6 | CM0172 | LjT39H01  | 3 | x5 | seed    | DF093306 |
|        |       | 4 |      | CM0172 | LjT15K20  | 1 | x3 | seed    | DF093306 |

|        |       |   |      |        |          |   |    |         |          |
|--------|-------|---|------|--------|----------|---|----|---------|----------|
| TM1793 | SSR   | 4 | 27.1 |        | LjT30K03 | 3 | x5 | seed    | AP009716 |
|        |       | 4 |      | CM0170 | LjB23D15 | 1 | x3 | seed    | DF093304 |
| TM0170 | dCAPS | 4 | 28.2 | CM0170 | LjT28B04 | 3 | x5 | seed    | DF093304 |
|        |       | 4 |      | CM0087 | LjT45N13 | 1 | x3 | walking | DF093246 |
| TM0087 | SSR   | 4 | 28.6 | CM0087 | LjT14P20 | 3 | x5 | seed    | DF093246 |
|        |       | 4 |      | CM0087 | LjT21I10 | 1 | x3 | walking | DF093246 |
| TM0093 | SSR   | 4 | 29.0 | CM0087 | LjT13G01 | 3 | x5 | seed    | DF093246 |
|        |       | 4 |      | CM0087 | LjB11J20 | 1 | x3 | walking | DF093246 |
| BM1397 | SSR   | 4 | 29.0 | CM0087 | LjB26F10 | 1 | x3 | walking | DF093246 |
|        |       | 4 |      | CM0087 | LjT01H14 | 1 | x3 | walking | DF093246 |
| TM1411 | SSR   | 4 | 29.0 | CM0087 | LjT46M09 | 1 | x3 | seed    | DF093246 |
| BM1890 | SSR   | 4 | 29.0 | CM0087 | LjB21L22 | 3 | x5 | seed    | DF093246 |
| TM0500 | SSR   | 4 | 29.4 | CM0500 | LjT36O16 | 1 | x3 | seed    | DF093436 |
|        |       | 4 |      | CM0500 | LjT17K02 | 1 | x3 | walking | DF093436 |
| BM1698 | SSR   | 4 | 30.2 |        | LjB15O07 | 3 | x5 | seed    | AP009629 |
| TM1874 | SSR   | 4 | 31.3 |        | LjT07P17 | 3 | x5 | seed    | AP009743 |
| TM0234 | SSR   | 4 | 31.8 | CM0234 | LjT09G09 | 3 | x5 | seed    | DF093340 |
|        |       | 4 |      | CM0234 | LjT09F09 | 1 | x3 | walking | DF093340 |
|        |       | 4 |      | CM0003 | LjT33L07 | 1 | x3 | walking | DF093178 |
| TM0003 | dCAPS | 4 | 31.8 | CM0003 | LjT09A24 | 3 | x5 | seed    | DF093178 |
| TM0030 | SSR   | 4 | 32.2 | CM0003 | LjT06A20 | 3 | x5 | seed    | DF093178 |
|        |       | 4 |      | CM0003 | LjB08A14 | 1 | x3 | walking | DF093178 |
|        |       | 4 |      | CM0003 | LjT06K06 | 1 | x3 | seed    | DF093178 |
|        |       | 4 |      | CM0219 | LjB13L02 | 1 | x3 | walking | DF093332 |
| TM0219 | SSR   | 4 | 32.7 | CM0219 | LjT32M04 | 3 | x5 | seed    | DF093332 |

|        |       |   |      |        |          |   |    |         |          |
|--------|-------|---|------|--------|----------|---|----|---------|----------|
|        |       | 4 |      | CM0219 | LjT06F24 | 1 | x3 | walking | DF093332 |
|        |       | 4 |      | CM0179 | LjT05M10 | 1 | x3 | walking | DF093313 |
| TM0542 | SSR   | 4 | 34.7 | CM0179 | LjT34O13 | 1 | x3 | seed    | DF093313 |
| TM0179 | SSR   | 4 | 34.7 | CM0179 | LjT11D24 | 3 | x5 | seed    | DF093313 |
|        |       | 4 |      | CM0179 | LjT58D12 | 1 | x3 | walking | DF093313 |
|        |       | 4 |      | CM0061 | LjT41D18 | 1 | x3 | seed    | DF093228 |
| TM0061 | dCAPS | 4 | 38.3 | CM0061 | LjT01K08 | 3 | x5 | seed    | DF093228 |
|        |       | 4 |      | CM0061 | LjT13J15 | 1 | x3 | walking | DF093228 |
| TM0421 | SSR   | 4 | 39.2 | CM0421 | LjT12G06 | 1 | x3 | seed    | DF093417 |
|        |       | 4 |      | CM0421 | LjT44F21 | 3 | x5 | walking | DF093417 |
|        |       | 4 |      | CM0244 | LjT60L22 | 1 | x3 | walking | DF093345 |
| TM0244 | SSR   | 4 | 39.2 | CM0244 | LjT37A01 | 3 | x5 | seed    | DF093345 |
| TM0664 | SSR   | 4 | 40.0 | CM0244 | LjT37C07 | 1 | x3 | seed    | DF093345 |
|        |       | 4 |      | CM0244 | LjB24G06 | 2 | x3 | walking | DF093345 |
| TM0303 | SSR   | 4 | 40.0 | CM0244 | LjT05D12 | 3 | x5 | seed    | DF093345 |
|        |       | 4 |      | CM0244 | LjB23A24 | 1 | x5 | walking | DF093345 |
| TM1039 | SSR   | 4 | 40.4 | CM0297 | LjT09A16 | 1 | x3 | seed    | DF093370 |
|        |       | 4 |      | CM0297 | LjT56A04 | 1 | x3 | walking | DF093370 |
| TM0297 | dCAPS | 4 | 40.8 | CM0297 | LjT23O19 | 3 | x5 | seed    | DF093370 |
|        |       | 4 |      | CM0297 | LjT45N19 | 1 | x3 | seed    | DF093370 |
|        |       | 4 |      | CM0297 | LjT36N01 | 1 | x3 | seed    | DF093370 |
|        |       | 4 |      | CM0297 | LjT39I23 | 1 | x3 | walking | DF093370 |
|        |       | 4 |      | CM0006 | LjT07I09 | 1 | x3 | walking | DF093181 |
| TM0006 | dCAPS | 4 | 41.6 | CM0006 | LjT17P02 | 3 | x5 | seed    | DF093181 |
|        |       | 4 |      | CM0006 | LjB06G16 | 1 | x3 | walking | DF093181 |

|        |       |   |      |        |          |   |    |         |          |
|--------|-------|---|------|--------|----------|---|----|---------|----------|
| TM0264 | dCAPS | 4 | 41.6 | CM0006 | LjT04O07 | 3 | x5 | seed    | DF093181 |
|        |       | 4 |      | CM0006 | LjT31N02 | 3 | x5 | seed    | DF093181 |
|        |       | 4 |      | CM0006 | LjT19G04 | 1 | x3 | walking | DF093181 |
|        |       | 4 |      | CM0006 | LjB09G07 | 3 | x5 | seed    | DF093181 |
|        |       | 4 |      | CM0006 | LjT25B05 | 1 | x3 | walking | DF093181 |
| TM0343 | SSR   | 4 | 41.6 | CM0006 | LjT27P02 | 3 | x5 | seed    | DF093181 |
| TM1509 | SSR   | 4 | 44.1 | CM0333 | LjT11C16 | 1 | x3 | walking | DF093390 |
| TM0333 | SSR   | 4 | 44.1 | CM0333 | LjT36O22 | 3 | x5 | seed    | DF093390 |
|        |       | 4 |      | CM0429 | LjT17H04 | 1 | x3 | walking | DF093419 |
| TM0429 | SSR   | 4 | 44.5 | CM0429 | LjT22K06 | 3 | x5 | seed    | DF093419 |
| TM0238 | SSR   | 4 | 47.0 |        | LjT32J05 | 3 | x5 | seed    | AP009663 |
| TM1401 | SSR   | 4 | 47.8 | CM0739 | LjT45O15 | 1 | x3 | walking | DF093477 |
|        |       | 4 |      | CM0739 | LjT24B12 | 1 | x3 | walking | DF093477 |
| TM0387 | SSR   | 4 | 47.8 | CM0387 | LjT27F14 | 3 | x5 | seed    | DF093408 |
| TM1865 | SSR   | 4 | 48.2 | CM0387 | LjT31N09 | 3 | x5 | seed    | DF093408 |
| TM1908 | SSR   | 4 | 48.2 | CM0387 | LjT30P17 | 3 | x5 | seed    | DF093408 |
| TM0555 | SSR   | 4 | 49.0 |        | LjT16L01 | 1 | x3 | seed    | AP010009 |
| TM0044 | SSR   | 4 | 50.2 | CM0044 | LjT04F23 | 3 | x5 | seed    | DF093213 |
|        |       | 4 |      | CM0044 | LjT40O09 | 1 | x3 | walking | DF093213 |
| TM0108 | SSR   | 4 | 51.0 | CM0044 | LjT42D17 | 3 | x5 | seed    | DF093213 |
| TM0399 | SSR   | 4 | 51.8 | CM0399 | LjT35C17 | 3 | x5 | seed    | DF093412 |
|        |       | 4 |      | CM0399 | LjT41A05 | 1 | x3 | seed    | DF093412 |
|        |       | 4 |      | CM0046 | LjT15D03 | 1 | x3 | seed    | DF093215 |
|        |       | 4 |      | CM0046 | LjT33J12 | 1 | x3 | seed    | DF093215 |
| TM0162 | SSR   | 4 | 53.0 | CM0046 | LjT44L05 | 3 | x5 | seed    | DF093215 |

|        |       |   |      |        |          |   |    |         |          |
|--------|-------|---|------|--------|----------|---|----|---------|----------|
| TM0404 | SSR   | 4 | 53.8 | CM0046 | LjT41M05 | 3 | x5 | seed    | DF093215 |
| TM0046 | SSR   | 4 | 53.8 | CM0046 | LjT07K08 | 3 | x5 | seed    | DF093215 |
| TM1884 | SSR   | 4 | 55.4 | CM0680 | LjT05B12 | 3 | x5 | seed    | DF093467 |
| TM1747 | SSR   | 4 | 55.8 | CM0680 | LjT20M06 | 3 | x5 | seed    | DF093467 |
|        |       | 4 |      | CM0680 | LjT25M06 | 3 | x5 | seed    | DF093467 |
| TM0597 | SSR   | 4 | 55.8 |        | LjT06I07 | 1 | x3 | seed    | AP010020 |
| TM0307 | SSR   | 4 | 56.2 | CM0307 | LjT43O18 | 3 | x5 | seed    | DF093375 |
|        |       | 4 |      | CM0307 | LjT32H01 | 1 | x3 | walking | DF093375 |
| TM1415 | SSR   | 4 | 57.0 |        | LjT13D08 | 1 | x3 | seed    | AP010188 |
| TM0844 | SSR   | 4 | 57.8 |        | LjT06B21 | 1 | x5 | seed    | AP010106 |
| TM1169 | SSR   | 4 | 58.6 |        | LjT12N18 | 1 | x3 | seed    | AP010163 |
|        |       | 4 |      | CM0175 | LjB21K13 | 1 | x3 | walking | DF093309 |
| TM0175 | SSR   | 4 | 59.0 | CM0175 | LjT10G08 | 3 | x5 | seed    | DF093309 |
|        |       | 4 |      | CM0175 | LjB09H01 | 1 | x3 | walking | DF093309 |
| TM0266 | SSR   | 4 | 59.4 | CM0175 | LjT39E03 | 3 | x5 | seed    | DF093309 |
|        |       | 4 |      | CM0175 | LjT56P09 | 1 | x3 | walking | DF093309 |
|        |       | 4 |      | CM0558 | LjT33E19 | 1 | x3 | walking | DF093446 |
| TM0558 | SSR   | 4 | 59.9 | CM0558 | LjT04E19 | 3 | x5 | seed    | DF093446 |
|        |       | 4 |      | CM0558 | LjT31L19 | 1 | x3 | walking | DF093446 |
| BM1174 | SSR   | 4 | 61.9 | CM0501 | LjB10P09 | 1 | x5 | walking | DF093437 |
|        |       | 4 |      | CM0501 | LjT38C17 | 1 | x3 | seed    | DF093437 |
|        |       | 4 |      | CM0025 | LjT39J02 | 1 | x3 | walking | DF093198 |
| TM0025 | dCAPS | 4 | 64.4 | CM0025 | LjT08D16 | 3 | x5 | seed    | DF093198 |
|        |       | 4 |      | CM0025 | LjT17B18 | 1 | x3 | walking | DF093198 |
|        |       | 4 |      | CM0004 | LjT45G06 | 1 | x3 | walking | DF093179 |



|        |       |   |      |        |          |   |    |         |          |
|--------|-------|---|------|--------|----------|---|----|---------|----------|
|        |       | 4 |      | CM0004 | LjT11H18 | 1 | x3 | walking | DF093179 |
| TM0004 | dCAPS | 4 | 65.6 | CM0004 | LjT15D01 | 3 | x5 | seed    | DF093179 |
|        |       | 4 |      | CM0004 | LjT25C04 | 1 | x3 | walking | DF093179 |
|        |       | 4 |      | CM0617 | LjT35B18 | 1 | x3 | seed    | DF093459 |
|        |       | 4 |      | CM0617 | LjT27N01 | 1 | x3 | walking | DF093459 |
| TM1545 | SSR   | 4 | 67.2 | CM0617 | LjT10K03 | 1 | x3 | seed    | DF093459 |
| TM0617 | SSR   | 4 | 67.6 | CM0617 | LjT20B07 | 1 | x3 | seed    | DF093459 |
|        |       | 4 |      | CM0617 | LjT41N05 | 1 | x3 | walking | DF093459 |
|        |       | 4 |      | CM0042 | LjB10K11 | 1 | x3 | walking | DF093212 |
| TM0214 | SSR   | 4 | 67.6 | CM0042 | LjT03K19 | 3 | x5 | seed    | DF093212 |
|        |       | 4 |      | CM0042 | LjT46F18 | 1 | x3 | walking | DF093212 |
|        |       | 4 |      | CM0042 | LjT15L12 | 1 | x3 | walking | DF093212 |
| TM0073 | SSR   | 4 | 67.6 | CM0042 | LjT16G15 | 3 | x5 | seed    | DF093212 |
|        |       | 4 |      | CM0042 | LjT29M06 | 1 | x3 | walking | DF093212 |
| TM0097 | SSR   | 4 | 67.6 | CM0042 | LjT15N19 | 3 | x5 | seed    | DF093212 |
|        |       | 4 |      | CM0042 | LjB20D23 | 3 | x5 | walking | DF093212 |
| TM0069 | SSR   | 4 | 68.8 | CM0042 | LjT13O11 | 3 | x5 | seed    | DF093212 |
|        |       | 4 |      | CM0042 | LjB15M24 | 3 | x5 | walking | DF093212 |
| TM1769 | SSR   | 4 | 68.8 | CM0042 | LjT08E22 | 3 | x5 | walking | DF093212 |
|        |       | 4 |      | CM0042 | LjT09K24 | 1 | x3 | seed    | DF093212 |
| TM1749 | SSR   | 4 | 68.8 | CM0042 | LjT06K07 | 3 | x5 | walking | DF093212 |
|        |       | 4 |      | CM0042 | LjT17C24 | 2 | x3 | walking | DF093212 |
| TM2002 | SSR   | 4 | 68.8 | CM0042 | LjT63K02 | 3 | x5 | walking | DF093212 |
| TM0042 | dCAPS | 4 | 69.2 | CM0042 | LjT10L16 | 3 | x5 | seed    | DF093212 |
|        |       | 4 |      | CM0042 | LjT49M15 | 3 | x5 | walking | DF093212 |

|        |       |   |     |        |          |   |    |         |          |
|--------|-------|---|-----|--------|----------|---|----|---------|----------|
|        |       | 4 |     | CM0042 | LjT16A19 | 1 | x3 | seed    | DF093212 |
| TM0146 | SSR   | 5 | 0.0 | CM0089 | LjT34P02 | 3 | x5 | seed    | DF093248 |
|        |       | 5 |     | CM0089 | LjT44D16 | 1 | x3 | walking | DF093248 |
|        |       | 5 |     | CM0089 | LjT32O11 | 1 | x3 | seed    | DF093248 |
|        |       | 5 |     | CM0089 | LjB74C16 | 1 | x3 | seed    | DF093248 |
|        |       | 5 |     | CM0089 | LjT44A18 | 1 | x3 | walking | DF093248 |
| TM0089 | dCAPS | 5 | 0.4 | CM0089 | LjT14E05 | 3 | x5 | seed    | DF093248 |
|        |       | 5 |     | CM0089 | LjT36K21 | 1 | x3 | walking | DF093248 |
| TM1392 | SSR   | 5 | 0.4 |        | LjT42D02 | 1 | x3 | seed    | AP010184 |
|        |       | 5 |     | CM0077 | LjT12P24 | 1 | x3 | walking | DF093240 |
| TM0822 | SSR   | 5 | 0.8 | CM0077 | LjT41A16 | 1 | x3 | seed    | DF093240 |
|        |       | 5 |     | CM0077 | LjT30J18 | 1 | x3 | walking | DF093240 |
|        |       | 5 |     | CM0077 | LjT08B03 | 3 | x3 | walking | DF093240 |
| TM0291 | SSR   | 5 | 0.8 | CM0077 | LjT36H12 | 3 | x5 | seed    | DF093240 |
| TM0077 | SSR   | 5 | 0.8 | CM0077 | LjT18O12 | 3 | x5 | seed    | DF093240 |
|        |       | 5 |     | CM0335 | LjB18O02 | 3 | x3 | walking | DF093391 |
| TM0335 | dCAPS | 5 | 1.2 | CM0335 | LjT48J22 | 3 | x5 | seed    | DF093391 |
|        |       | 5 |     | CM0335 | LjT31F22 | 1 | x3 | seed    | DF093391 |
|        |       | 5 |     | CM0335 | LjT61A03 | 1 | x3 | walking | DF093391 |
| TM0852 | SSR   | 5 | 2.8 | CM0852 | LjT41B10 | 1 | x3 | seed    | DF093492 |
|        |       | 5 |     | CM0852 | LjT30K21 | 3 | x5 | walking | DF093492 |
| TM0321 | dCAPS | 5 | 3.6 | CM0096 | LjT04J15 | 3 | x5 | seed    | DF093252 |
|        |       | 5 |     | CM0096 | LjT56L17 | 1 | x3 | walking | DF093252 |
| TM0096 | SSR   | 5 | 3.6 | CM0096 | LjT08M07 | 3 | x5 | seed    | DF093252 |
|        |       | 5 |     | CM0096 | LjT37I17 | 1 | x3 | walking | DF093252 |

|        |       |   |     |        |          |   |    |         |                             |
|--------|-------|---|-----|--------|----------|---|----|---------|-----------------------------|
|        |       | 5 |     | CM0096 | LjB15L19 | 1 | x3 | walking | DF093252                    |
| TM1423 | SSR   | 5 | 3.6 | CM0096 | LjT02H08 | 1 | x3 | seed    | DF093252                    |
|        |       | 5 |     | CM0569 | LjT36J24 | 1 | x3 | walking | DF093447                    |
| TM0569 | SSR   | 5 | 4.0 | CM0569 | LjT34K16 | 3 | x5 | seed    | DF093447                    |
| TM0362 | SSR   | 5 | 4.4 | CM0019 | LjT02J09 | 1 | x5 | seed    | DF093193                    |
| TM0019 | dCAPS | 5 | 4.8 | CM0019 | LjT05B20 | 3 | x5 | seed    | DF093193                    |
| TM0034 | SSR   | 5 | 4.8 | CM0034 | LjT02M03 | 3 | x5 | seed    | DF093206                    |
|        |       | 5 |     | CM0034 | LjT33A19 | 1 | x3 | walking | DF093206                    |
| TM0090 | SSR   | 5 | 5.2 |        | LjT01J10 | 3 | x5 | seed    | AP009801(a),<br>AP009802(b) |
| TM0455 | SSR   | 5 | 5.2 | CM0040 | LjT28O20 | 1 | x3 | seed    | DF093210                    |
|        |       | 5 |     | CM0040 | LjT36N08 | 3 | x5 | walking | DF093210                    |
|        |       | 5 |     | CM0040 | LjT40J13 | 1 | x3 | walking | DF093210                    |
| TM0043 | SSR   | 5 | 5.6 | CM0040 | LjT01O22 | 3 | x5 | seed    | DF093210                    |
|        |       | 5 |     | CM0040 | LjT02D17 | 1 | x3 | walking | DF093210                    |
| TM0040 | dCAPS | 5 | 5.6 | CM0040 | LjT16I07 | 3 | x5 | seed    | DF093210                    |
| BM1799 | SSR   | 5 | 5.6 | CM0040 | LjB01H03 | 3 | x5 | walking | DF093210                    |
| BM1988 | SSR   | 5 | 5.6 | CM0040 | LjB17J16 | 3 | x5 | walking | DF093210                    |
|        |       | 5 |     | CM0040 | LjB11C22 | 2 | x5 | walking | DF093210                    |
|        |       | 5 |     | CM0345 | LjT10B19 | 3 | x3 | walking | DF093396                    |
| TM1980 | SSR   | 5 | 5.6 | CM0345 | LjT25H19 | 3 | x5 | walking | DF093396                    |
|        |       | 5 |     | CM0345 | LjB67C16 | 1 | x3 | walking | DF093396                    |
|        |       | 5 |     | CM0345 | LjT48I12 | 1 | x3 | walking | DF093396                    |
|        |       | 5 |     | CM0345 | LjT06A03 | 3 | x5 | walking | DF093396                    |
|        |       | 5 |     | CM0345 | LjB24B17 | 1 | x3 | walking | DF093396                    |

|        |     |   |      |        |           |   |    |         |                             |
|--------|-----|---|------|--------|-----------|---|----|---------|-----------------------------|
|        |     | 5 |      | CM0345 | LjB21J19  | 3 | x5 | walking | DF093396                    |
| BM2025 | SSR | 5 | 5.6  | CM0345 | LjB355E10 | 3 | x5 | walking | DF093396                    |
| TM1989 | SSR | 5 | 5.6  | CM0345 | LjT08J01  | 3 | x5 | walking | DF093396                    |
|        |     | 5 |      | CM0345 | LjT06D17  | 3 | x5 | walking | DF093396                    |
| TM1859 | SSR | 5 | 5.6  | CM0345 | LjT27F16  | 2 | x5 | walking | DF093396                    |
|        |     | 5 |      | CM0345 | LjB03C01  | 3 | x5 | walking | DF093396                    |
| BM1787 | SSR | 5 | 5.6  | CM0345 | LjB06H02  | 3 | x5 | walking | DF093396                    |
|        |     | 5 |      | CM0345 | LjT01M08  | 1 | x3 | seed    | DF093396                    |
|        |     | 5 |      | CM0345 | LjB21B04  | 3 | x5 | walking | DF093396                    |
| TM1575 | SSR | 5 | 6.8  | CM0345 | LjT06P20  | 3 | x5 | seed    | DF093396                    |
|        |     | 5 |      | CM0345 | LjT03E08  | 3 | x5 | walking | DF093396                    |
| TM1786 | SSR | 5 | 6.8  | CM0345 | LjT08F11  | 3 | x5 | walking | DF093396                    |
| TM0963 | SSR | 5 | 7.2  |        | LjT32I14  | 1 | x3 | seed    | AP010138                    |
| TM0072 | SSR | 5 | 7.6  | CM0072 | LjT02A14  | 3 | x5 | seed    | DF093237                    |
|        |     | 5 |      | CM0072 | LjT09M22  | 1 | x3 | seed    | DF093237                    |
| TM0428 | SSR | 5 | 8.0  |        | LjT23J23  | 1 | x3 | seed    | AP009974                    |
| TM0696 | SSR | 5 | 9.6  |        | LjT08O17  | 1 | x5 | seed    | AP010051                    |
| TM1077 | SSR | 5 | 11.2 |        | LjT09C21  | 1 | x5 | seed    | AP010154                    |
| TM0657 | SSR | 5 | 11.6 | CM0657 | LjT29A12  | 3 | x5 | seed    | DF093462                    |
|        |     | 5 |      | CM0657 | LjB26K13  | 1 | x3 | walking | DF093462                    |
| TM1547 | SSR | 5 | 11.6 |        | LjT48O19  | 1 | x3 | seed    | AP010219                    |
| TM0471 | SSR | 5 | 11.6 | CM0359 | LjT02H19  | 1 | x3 | seed    | DF093400                    |
| TM0359 | SSR | 5 | 11.6 | CM0359 | LjT01C14  | 3 | x5 | seed    | DF093400                    |
| BM1982 | SSR | 5 | 12.0 |        | LjB09C24  | 3 | x5 | seed    | AP009795(a),<br>AP009796(b) |

|        |     |   |      |        |           |   |    |         |                                             |
|--------|-----|---|------|--------|-----------|---|----|---------|---------------------------------------------|
| TM1496 | SSR | 5 | 12.0 |        | LjT40M15  | 3 | x5 | seed    | AP009843(a),<br>AP009844(b),<br>AP009845(c) |
| TM0743 | SSR | 5 | 12.4 |        | LjT10N02  | 1 | x3 | seed    | AP010069                                    |
| BM1886 | SSR | 5 | 12.4 | CM1813 | LjB14G21  | 3 | x5 | walking | DF093529                                    |
|        |     | 5 |      | CM1813 | LjT22C22  | 3 | x5 | seed    | DF093529                                    |
| TM1373 | SSR | 5 | 12.4 |        | LjT12G17  | 3 | x5 | seed    | AP009690                                    |
|        |     | 5 |      | CM0911 | LjT40K06  | 1 | x3 | seed    | DF093498                                    |
|        |     | 5 |      | CM0911 | LjT20M23  | 1 | x3 | walking | DF093498                                    |
| TM0911 | SSR | 5 | 12.4 | CM0911 | LjT39H15  | 1 | x3 | seed    | DF093498                                    |
|        |     | 5 |      | CM0571 | LjT25K24  | 1 | x3 | seed    | DF093448                                    |
| TM0571 | SSR | 5 | 12.4 | CM0571 | LjT29C08  | 1 | x3 | seed    | DF093448                                    |
| TM0765 | SSR | 5 | 12.4 | CM0571 | LjT18L04  | 1 | x3 | seed    | DF093448                                    |
| TM0562 | SSR | 5 | 12.4 |        | LjT42I01  | 1 | x3 | seed    | AP010012                                    |
|        |     | 5 |      | CM0278 | LjB25L11  | 1 | x3 | walking | DF093360                                    |
| TM0278 | SSR | 5 | 12.4 | CM0278 | LjT01K09  | 3 | x5 | seed    | DF093360                                    |
|        |     | 5 |      | CM0278 | LjT20M14  | 1 | x3 | walking | DF093360                                    |
|        |     | 5 |      | CM0813 | LjT45B16  | 2 | x5 | walking | DF093486                                    |
|        |     | 5 |      | CM0813 | LjT11B03  | 3 | x5 | walking | DF093486                                    |
| TM0813 | SSR | 5 | 12.8 | CM0813 | LjT33J17  | 1 | x3 | seed    | DF093486                                    |
|        |     | 5 |      | CM1125 | LjT16E17  | 3 | x5 | walking | DF093507                                    |
|        |     | 5 |      | CM1125 | LjT48B18  | 3 | x5 | walking | DF093507                                    |
| TM1125 | SSR | 5 | 13.2 | CM1125 | LjT08L06  | 3 | x5 | seed    | DF093507                                    |
|        |     | 5 |      | CM1125 | LjT43O12  | 3 | x5 | walking | DF093507                                    |
|        |     | 5 |      | CM1125 | LjT114C18 | 3 | x5 | walking | DF093507                                    |
|        |     | 5 |      | CM1125 | LjT28L23  | 2 | x5 | seed    | DF093507                                    |

|        |       |   |      |        |          |   |    |         |          |
|--------|-------|---|------|--------|----------|---|----|---------|----------|
|        |       | 5 |      | CM1125 | LjT13I22 | 1 | x3 | walking | DF093507 |
|        |       | 5 |      | CM0024 | LjT15B12 | 3 | x5 | walking | DF093197 |
| TM2004 | SSR   | 5 | 13.2 | CM0024 | LjT33B14 | 3 | x5 | walking | DF093197 |
| TM0024 | dCAPS | 5 | 13.2 | CM0024 | LjT17D01 | 3 | x5 | seed    | DF093197 |
|        |       | 5 |      | CM0024 | LjT22B04 | 3 | x5 | walking | DF093197 |
|        |       | 5 |      | CM0024 | LjT25M10 | 3 | x5 | walking | DF093197 |
| BM1728 | SSR   | 5 | 13.6 | CM0024 | LjB08F01 | 3 | x5 | walking | DF093197 |
|        |       | 5 |      | CM0024 | LjT28I17 | 3 | x5 | walking | DF093197 |
|        |       | 5 |      | CM0024 | LjT17C17 | 3 | x5 | walking | DF093197 |
|        |       | 5 |      | CM1574 | LjT17J11 | 3 | x5 | walking | DF093521 |
| TM1574 | SSR   | 5 | 14.4 | CM1574 | LjT06F10 | 1 | x3 | seed    | DF093521 |
|        |       | 5 |      | CM1574 | LjT35C10 | 3 | x5 | walking | DF093521 |
| BM1891 | SSR   | 5 | 14.8 | CM1574 | LjB11L10 | 3 | x5 | walking | DF093521 |
| TM1755 | SSR   | 5 | 14.8 |        | LjT15N12 | 3 | x5 | seed    | AP009703 |
| TM1743 | SSR   | 5 | 14.8 |        | LjT35F02 | 3 | x5 | seed    | AP009702 |
|        |       | 5 |      | CM0494 | LjT22J03 | 1 | x3 | walking | DF093434 |
| TM0494 | SSR   | 5 | 14.8 | CM0494 | LjT21E22 | 1 | x3 | seed    | DF093434 |
| BM1460 | SSR   | 5 | 14.8 | CM0494 | LjB11K16 | 3 | x5 | walking | DF093434 |
| TM0151 | SSR   | 5 | 15.2 |        | LjT45G21 | 3 | x5 | seed    | AP009655 |
| TM0341 | SSR   | 5 | 15.6 | CM0341 | LjT09O10 | 3 | x5 | seed    | DF093394 |
|        |       | 5 |      | CM0341 | LjB26D17 | 1 | x3 | walking | DF093394 |
|        |       | 5 |      | CM0071 | LjT11G02 | 1 | x3 | seed    | DF093236 |
|        |       | 5 |      | CM0071 | LjT45J13 | 1 | x3 | walking | DF093236 |
| TM0071 | dCAPS | 5 | 16.8 | CM0071 | LjT12L11 | 3 | x5 | seed    | DF093236 |
|        |       | 5 |      | CM0086 | LjT02C18 | 1 | x3 | walking | DF093245 |

|        |       |   |      |        |          |   |    |         |                             |
|--------|-------|---|------|--------|----------|---|----|---------|-----------------------------|
| TM0086 | dCAPS | 5 | 16.8 | CM0086 | LjT15O18 | 3 | x5 | seed    | DF093245                    |
| TM0744 | SSR   | 5 | 18.8 |        | LjT25P23 | 1 | x3 | seed    | AP010070                    |
| TM0431 | SSR   | 5 | 19.2 |        | LjT41L03 | 1 | x3 | seed    | AP009976                    |
| TM1634 | SSR   | 5 | 20.0 |        | LjT09B23 | 1 | x3 | seed    | AP010234                    |
| TM0280 | dCAPS | 5 | 20.4 |        | LjT29J15 | 3 | x5 | seed    | AP009809(a),<br>AP009810(b) |
| TM0186 | SSR   | 5 | 20.4 |        | LjT18P14 | 1 | x5 | seed    | AP009954                    |
| TM1323 | SSR   | 5 | 22.8 |        | LjT15D05 | 1 | x3 | seed    | AP010183                    |
|        |       | 5 |      | CM0062 | LjT06F01 | 1 | x3 | walking | DF093229                    |
| TM0062 | SSR   | 5 | 23.2 | CM0062 | LjT10C05 | 3 | x5 | seed    | DF093229                    |
| TM0211 | SSR   | 5 | 24.0 | CM0211 | LjT48O21 | 3 | x5 | seed    | DF093328                    |
|        |       | 5 |      | CM0211 | LjT24K19 | 1 | x3 | walking | DF093328                    |
|        |       | 5 |      | CM0299 | LjB03O04 | 1 | x3 | walking | DF093371                    |
| TM0299 | SSR   | 5 | 24.4 | CM0299 | LjT25E08 | 3 | x5 | seed    | DF093371                    |
| TM0350 | SSR   | 5 | 24.4 | CM0299 | LjT48D16 | 1 | x5 | seed    | DF093371                    |
| TM1598 | SSR   | 5 | 26.4 | CM1598 | LjT34B21 | 1 | x3 | seed    | DF093522                    |
| BM1888 | SSR   | 5 | 26.4 | CM1598 | LjB16B21 | 3 | x5 | seed    | DF093522                    |
|        |       | 5 |      | CM0048 | LjT09F11 | 2 | x3 | walking | DF093217                    |
| TM0048 | SSR   | 5 | 27.6 | CM0048 | LjT05P01 | 3 | x5 | seed    | DF093217                    |
|        |       | 5 |      | CM0048 | LjB65P04 | 1 | x3 | walking | DF093217                    |
| TM0714 | SSR   | 5 | 28.0 | CM0048 | LjT14E15 | 1 | x3 | seed    | DF093217                    |
| TM0158 | SSR   | 5 | 28.9 | CM0158 | LjT21J12 | 3 | x5 | seed    | DF093296                    |
|        |       | 5 |      | CM0158 | LjB22J23 | 1 | x3 | walking | DF093296                    |
|        |       | 5 |      | CM0239 | LjB10D03 | 1 | x3 | walking | DF093342                    |
| TM0239 | SSR   | 5 | 30.8 | CM0239 | LjT37K17 | 3 | x5 | seed    | DF093342                    |

|        |       |   |      |        |           |   |    |         |          |
|--------|-------|---|------|--------|-----------|---|----|---------|----------|
|        |       | 5 |      | CM0239 | LjT09O18  | 1 | x3 | walking | DF093342 |
|        |       | 5 |      | CM0239 | LjB25E16  | 2 | x3 | walking | DF093342 |
| TM0849 | SSR   | 5 | 31.6 | CM0239 | LjT46E22  | 1 | x5 | seed    | DF093342 |
|        |       | 5 |      | CM0239 | LjB03D07  | 3 | x5 | walking | DF093342 |
| TM0951 | SSR   | 5 | 31.6 | CM0239 | LjT25G01  | 3 | x5 | seed    | DF093342 |
| TM0773 | SSR   | 5 | 32.0 | CM0239 | LjT36C12  | 1 | x3 | seed    | DF093342 |
| TM0913 | SSR   | 5 | 33.2 |        | LjT38I13  | 1 | x3 | seed    | AP010128 |
| TM1493 | SSR   | 5 | 33.6 |        | LjT17N18  | 1 | x3 | seed    | AP010206 |
| TM1774 | SSR   | 5 | 33.6 | CM0909 | LjT30I13  | 3 | x5 | walking | DF093497 |
| TM0909 | SSR   | 5 | 34.0 | CM0909 | LjT46H07  | 1 | x3 | seed    | DF093497 |
|        |       | 5 |      | CM0909 | LjT45M19  | 3 | x5 | seed    | DF093497 |
| TM1816 | SSR   | 5 | 34.8 | CM0909 | LjT135A04 | 3 | x5 | walking | DF093497 |
| BM1817 | SSR   | 5 | 34.8 | CM0909 | LjB21K15  | 3 | x5 | walking | DF093497 |
|        |       | 5 |      | CM0909 | LjT14F05  | 3 | x5 | walking | DF093497 |
|        |       | 5 |      | CM0909 | LjT34P16  | 3 | x5 | walking | DF093497 |
|        |       | 5 |      | CM0909 | LjT23O16  | 3 | x5 | seed    | DF093497 |
|        |       | 5 |      | CM0909 | LjT25M07  | 3 | x5 | walking | DF093497 |
| TM0138 | dCAPS | 5 | 36.8 |        | LjT43D06  | 1 | x5 | seed    | AP009951 |
|        |       | 5 |      | CM0311 | LjT47C07  | 1 | x3 | walking | DF093378 |
| TM0311 | dCAPS | 5 | 37.6 | CM0311 | LjT23C14  | 3 | x5 | seed    | DF093378 |
| TM0095 | SSR   | 5 | 37.6 | CM0095 | LjT02L13  | 3 | x5 | seed    | DF093251 |
|        |       | 5 |      | CM0095 | LjT04H13  | 1 | x3 | walking | DF093251 |
| TM0389 | SSR   | 5 | 39.2 |        | LjT17D03  | 1 | x5 | seed    | AP009964 |
| TM1667 | SSR   | 5 | 42.5 |        | LjT08L18  | 1 | x3 | seed    | AP010249 |
|        |       | 5 |      | CM0344 | LjB22E16  | 1 | x3 | walking | DF093395 |



|        |       |   |      |        |           |   |    |         |          |
|--------|-------|---|------|--------|-----------|---|----|---------|----------|
| TM0344 | SSR   | 5 | 42.9 | CM0344 | LjT12L15  | 3 | x5 | seed    | DF093395 |
| TM1417 | SSR   | 5 | 42.9 | CM0344 | LjT10A13  | 1 | x3 | seed    | DF093395 |
| TM0052 | SSR   | 5 | 44.1 | CM0052 | LjT08O18  | 3 | x5 | seed    | DF093221 |
|        |       | 5 |      | CM0052 | LjT17A13  | 1 | x3 | seed    | DF093221 |
|        |       | 5 |      | CM0052 | LjT02N08  | 1 | x3 | seed    | DF093221 |
|        |       | 5 |      | CM0456 | LjT30D08  | 1 | x3 | seed    | DF093426 |
| TM0456 | SSR   | 5 | 44.1 | CM0456 | LjT01K11  | 1 | x3 | seed    | DF093426 |
|        |       | 5 |      | CM0148 | LjT55H21  | 1 | x3 | walking | DF093291 |
| TM0148 | dCAPS | 5 | 44.1 | CM0148 | LjT30P03  | 3 | x5 | seed    | DF093291 |
|        |       | 5 |      | CM0148 | LjT27I11  | 3 | x3 | walking | DF093291 |
| TM0596 | SSR   | 5 | 44.5 | CM0148 | LjT12O14  | 1 | x3 | seed    | DF093291 |
| TM1672 | SSR   | 5 | 44.9 | CM0953 | LjT35J07  | 3 | x5 | walking | DF093499 |
| TM0953 | SSR   | 5 | 44.9 | CM0953 | LjT17N13  | 3 | x5 | seed    | DF093499 |
|        |       | 5 |      | CM0953 | LjT25I15  | 1 | x3 | walking | DF093499 |
|        |       | 5 |      | CM0357 | LjT05F18  | 2 | x5 | seed    | DF093399 |
|        |       | 5 |      | CM0357 | LjB19F18  | 3 | x5 | walking | DF093399 |
| TM1748 | SSR   | 5 | 46.1 | CM0357 | LjT34P10  | 3 | x5 | walking | DF093399 |
|        |       | 5 |      | CM0357 | LjT127E18 | 3 | x5 | walking | DF093399 |
|        |       | 5 |      | CM0357 | LjT32M13  | 3 | x5 | walking | DF093399 |
| TM0357 | SSR   | 5 | 47.3 | CM0357 | LjT02P23  | 3 | x5 | seed    | DF093399 |
| TM1692 | SSR   | 5 | 47.3 | CM0357 | LjT05J08  | 3 | x5 | walking | DF093399 |
| TM0710 | SSR   | 5 | 47.3 | CM0357 | LjT32K11  | 1 | x3 | seed    | DF093399 |
| TM1466 | SSR   | 5 | 47.3 |        | LjT25B19  | 1 | x3 | seed    | AP010199 |
| TM1563 | SSR   | 5 | 47.3 | CM0956 | LjT06D07  | 3 | x5 | seed    | DF093501 |
| TM0956 | SSR   | 5 | 47.3 | CM0956 | LjT07L11  | 1 | x3 | seed    | DF093501 |

|        |       |   |      |        |           |   |    |         |                             |
|--------|-------|---|------|--------|-----------|---|----|---------|-----------------------------|
|        |       | 5 |      | CM0200 | LjT01E18  | 1 | x3 | walking | DF093323                    |
| TM0218 | SSR   | 5 | 47.7 | CM0200 | LjT47L09  | 3 | x5 | seed    | DF093323                    |
|        |       | 5 |      | CM0200 | LjT42H18  | 1 | x3 | walking | DF093323                    |
| TM0200 | SSR   | 5 | 48.5 | CM0200 | LjT09H13  | 3 | x5 | seed    | DF093323                    |
|        |       | 5 |      | CM0200 | LjT09M14  | 1 | x3 | walking | DF093323                    |
| TM0327 | dCAPS | 5 | 49.7 | CM0200 | LjT33L13  | 3 | x5 | seed    | DF093323                    |
|        |       | 5 |      | CM0200 | LjB26H09  | 1 | x3 | walking | DF093323                    |
| TM0290 | SSR   | 5 | 49.7 | CM0200 | LjT43G19  | 3 | x5 | seed    | DF093323                    |
|        |       | 5 |      | CM0200 | LjB21O22  | 1 | x3 | walking | DF093323                    |
| TM0366 | SSR   | 5 | 49.7 | CM0200 | LjT31L14  | 3 | x5 | seed    | DF093323                    |
| TM1834 | SSR   | 5 | 49.7 |        | LjT24B10  | 3 | x5 | seed    | AP009725                    |
| TM0731 | SSR   | 5 | 50.1 |        | LjT04G07  | 1 | x3 | seed    | AP010067                    |
|        |       | 5 |      | CM0328 | LjB141A22 | 1 | x3 | walking | DF093389                    |
| TM0703 | SSR   | 5 | 50.1 | CM0328 | LjT11C19  | 1 | x3 | seed    | DF093389                    |
| TM0328 | SSR   | 5 | 50.1 | CM0328 | LjT38F20  | 3 | x5 | seed    | DF093389                    |
|        |       | 5 |      | CM0328 | LjT21F24  | 1 | x3 | seed    | DF093389                    |
| TM1733 | SSR   | 5 | 52.5 | CM1439 | LjT04I06  | 1 | x5 | seed    | DF093516                    |
| TM1439 | SSR   | 5 | 52.5 | CM1439 | LjT02A04  | 1 | x3 | seed    | DF093516                    |
| TM1780 | SSR   | 5 | 52.5 |        | LjT14K23  | 3 | x5 | seed    | AP009858(a),<br>AP009859(b) |
| TM0698 | SSR   | 5 | 52.5 |        | LjT02I10  | 1 | x3 | seed    | AP010053                    |
| TM0872 | SSR   | 5 | 52.5 |        | LjT39E05  | 1 | x3 | seed    | AP010118                    |
| TM0180 | SSR   | 5 | 54.1 | CM0180 | LjT03D07  | 3 | x5 | seed    | DF093314                    |
|        |       | 5 |      | CM0180 | LjT23A04  | 1 | x3 | walking | DF093314                    |
| TM0656 | SSR   | 5 | 54.5 | CM0260 | LjT03M08  | 1 | x3 | seed    | DF093354                    |

|        |     |   |      |        |           |   |    |         |             |
|--------|-----|---|------|--------|-----------|---|----|---------|-------------|
|        |     | 5 |      | CM0260 | LjT02L21  | 3 | x3 | walking | DF093354    |
| TM0260 | SSR | 5 | 54.9 | CM0260 | LjT47K21  | 3 | x5 | seed    | DF093354    |
|        |     | 5 |      | CM0260 | LjT09O04  | 1 | x3 | walking | DF093354    |
| TM1948 | SSR | 5 | 56.1 |        | LjT42F22  | 3 | x5 | seed    | AP009775    |
| BM1714 | SSR | 6 | 0.0  | CM1613 | LjB23G22  | 3 | x5 | seed    | DF093523    |
|        |     | 6 |      | CM1613 | LjB02L14  | 3 | x5 | walking | DF093523    |
| TM1613 | SSR | 6 | 1.3  | CM1613 | LjT35E20  | 1 | x3 | seed    | DF093523    |
| TM0082 | SSR | 6 | 1.3  |        | LjT06I08c | 3 | x5 | seed    | AP009799(a) |
| TM0553 | SSR | 6 | 1.7  |        | LjT21O06  | 1 | x3 | seed    | AP010008    |
| TM1383 | SSR | 6 | 1.7  | CM0686 | LjT26K12  | 1 | x3 | walking | DF093468    |
|        |     | 6 |      | CM0686 | LjT44C06  | 1 | x3 | seed    | DF093468    |
| TM1004 | SSR | 6 | 2.9  | CM0472 | LjT32I13  | 3 | x5 | seed    | DF093432    |
| TM0472 | SSR | 6 | 3.3  | CM0472 | LjT08D18  | 1 | x3 | seed    | DF093432    |
| TM0722 | SSR | 6 | 4.1  |        | LjT17I05  | 1 | x3 | seed    | AP010063    |
|        |     | 6 |      | CM0679 | LjT16E05  | 3 | x5 | seed    | DF093466    |
| TM1264 | SSR | 6 | 6.1  | CM0679 | LjT31L16  | 1 | x3 | seed    | DF093466    |
| TM0679 | SSR | 6 | 6.1  | CM0679 | LjT08J21  | 1 | x3 | seed    | DF093466    |
| TM0517 | SSR | 6 | 6.5  |        | LjT19B22  | 1 | x3 | seed    | AP010001    |
|        |     | 6 |      | CM0014 | LjT08H23  | 1 | x3 | walking | DF093189    |
| TM0014 | SSR | 6 | 7.7  | CM0014 | LjT17C05  | 3 | x5 | seed    | DF093189    |
| TM1597 | SSR | 6 | 7.7  |        | LjT40F03  | 1 | x3 | seed    | AP010229    |
| TM0817 | SSR | 6 | 13.6 | CM0738 | LjT44P17  | 1 | x3 | seed    | DF093476    |
| TM0738 | SSR | 6 | 14.0 | CM0738 | LjT04I05  | 1 | x3 | seed    | DF093476    |
|        |     | 6 |      | CM0738 | LjB22G09  | 1 | x3 | walking | DF093476    |
| TM0302 | SSR | 6 | 14.0 | CM0302 | LjT37I11  | 3 | x5 | seed    | DF093373    |

|        |       |   |      |        |           |   |    |         |                             |
|--------|-------|---|------|--------|-----------|---|----|---------|-----------------------------|
|        |       | 6 |      | CM0302 | LjT13O03  | 1 | x3 | walking | DF093373                    |
| BM1429 | SSR   | 6 | 14.0 |        | LjB02K20  | 1 | x3 | seed    | AP009945                    |
| TM0306 | SSR   | 6 | 16.0 |        | LjT23A02  | 3 | x5 | seed    | AP009667                    |
| TM0689 | SSR   | 6 | 16.4 |        | LjT34N14  | 1 | x3 | seed    | AP010049                    |
| TM1261 | SSR   | 6 | 17.2 |        | LjT45M05  | 1 | x3 | seed    | AP010174                    |
| TM0084 | dCAPS | 6 | 18.4 |        | LjT18B08  | 1 | x5 | seed    | AP009949                    |
| TM0169 | SSR   | 6 | 18.8 |        | LjT30N23  | 1 | x5 | seed    | AP009953                    |
| TM1862 | SSR   | 6 | 18.8 |        | LjT13N05  | 3 | x5 | seed    | AP009862(a),<br>AP009863(b) |
| TM2023 | SSR   | 6 | 20.8 |        | LjT11E14  | 3 | x5 | seed    | AP009789                    |
| TM0245 | SSR   | 6 | 20.8 | CM0245 | LjT05I20  | 3 | x5 | seed    | DF093346                    |
|        |       | 6 |      | CM0245 | LjT38C24  | 1 | x3 | walking | DF093346                    |
| TM1789 | SSR   | 6 | 20.8 | CM1789 | LjT18K17  | 2 | x5 | seed    | DF093528                    |
|        |       | 6 |      | CM1789 | LjT123N17 | 2 | x5 | walking | DF093528                    |
| TM1514 | SSR   | 6 | 21.6 | CM1514 | LjT13L20  | 3 | x3 | seed    | DF093519                    |
|        |       | 6 |      | CM1514 | LjT43E06  | 3 | x3 | seed    | DF093519                    |
|        |       | 6 |      | CM1514 | LjB23M19  | 2 | x5 | walking | DF093519                    |
| TM0632 | SSR   | 6 | 23.6 |        | LjT15B22  | 1 | x3 | seed    | AP010031                    |
| TM1091 | SSR   | 6 | 24.4 |        | LjT46B14  | 3 | x5 | seed    | AP009686                    |
| TM0821 | SSR   | 6 | 26.0 |        | LjT41B02  | 1 | x3 | seed    | AP010099                    |
|        |       | 6 |      | CM0836 | LjT02L19  | 1 | x3 | walking | DF093491                    |
| TM0836 | SSR   | 6 | 27.2 | CM0836 | LjT24B05  | 3 | x5 | seed    | DF093491                    |
|        |       | 6 |      | CM0836 | LjT48D13  | 1 | x3 | walking | DF093491                    |
| TM0057 | SSR   | 6 | 27.6 | CM0057 | LjT03B03  | 3 | x5 | seed    | DF093224                    |
|        |       | 6 |      | CM0057 | LjT43M06  | 1 | x3 | seed    | DF093224                    |

|        |       |   |      |        |           |   |    |         |                             |
|--------|-------|---|------|--------|-----------|---|----|---------|-----------------------------|
| TM0331 | SSR   | 6 | 27.6 | CM0057 | LjT30M07  | 3 | x5 | seed    | DF093224                    |
| TM0085 | dCAPS | 6 | 27.6 |        | LjT14A08  | 1 | x5 | seed    | AP009950                    |
| TM1374 | SSR   | 6 | 28.0 |        | LjT34E09  | 3 | x5 | seed    | AP009841(a),<br>AP009842(b) |
| TM1650 | SSR   | 6 | 28.8 |        | LjT28D11  | 3 | x5 | seed    | AP009848(a),<br>AP009849(b) |
|        |       | 6 |      | CM0041 | LjT25M04  | 1 | x3 | walking | DF093211                    |
| TM0041 | SSR   | 6 | 32.5 | CM0041 | LjT17H19  | 3 | x5 | seed    | DF093211                    |
|        |       | 6 |      | CM0041 | LjT38I04  | 1 | x3 | walking | DF093211                    |
|        |       | 6 |      | CM0037 | LjT48H23  | 3 | x5 | walking | DF093208                    |
|        |       | 6 |      | CM0037 | LjT13E22  | 1 | x3 | walking | DF093208                    |
| TM0037 | dCAPS | 6 | 32.9 | CM0037 | LjT16K17  | 3 | x5 | seed    | DF093208                    |
|        |       | 6 |      | CM0037 | LjB140B09 | 2 | x3 | walking | DF093208                    |
|        |       | 6 |      | CM0037 | LjT32L10  | 2 | x5 | walking | DF093208                    |
|        |       | 6 |      | CM0037 | LjT02F19  | 3 | x5 | walking | DF093208                    |
|        |       | 6 |      | CM0037 | LjB04H20  | 3 | x5 | walking | DF093208                    |
|        |       | 6 |      | CM0037 | LjT46O03  | 3 | x5 | walking | DF093208                    |
|        |       | 6 |      | CM0037 | LjT40N16  | 3 | x5 | walking | DF093208                    |
|        |       | 6 |      | CM0037 | LjB382I13 | 3 | x5 | walking | DF093208                    |
|        |       | 6 |      | CM0037 | LjB26B08  | 3 | x5 | walking | DF093208                    |
| TM0317 | SSR   | 6 | 34.9 | CM0037 | LjT18F01  | 1 | x5 | seed    | DF093208                    |
|        |       | 6 |      | CM0037 | LjT47N19  | 3 | x5 | walking | DF093208                    |
|        |       | 6 |      | CM0037 | LjT41F23  | 3 | x5 | seed    | DF093208                    |
|        |       | 6 |      | CM0037 | LjT33N07  | 1 | x3 | walking | DF093208                    |
| TM0140 | SSR   | 6 | 36.1 | CM0037 | LjT21P04  | 3 | x5 | seed    | DF093208                    |
| TM1540 | SSR   | 6 | 36.1 |        | LjT45M04  | 1 | x3 | seed    | AP010216                    |

|        |       |   |      |        |           |   |    |         |          |
|--------|-------|---|------|--------|-----------|---|----|---------|----------|
| TM0440 | SSR   | 6 | 36.1 | CM0440 | LjT24F06  | 3 | x3 | seed    | DF093423 |
|        |       | 6 |      | CM0013 | LjB74E12  | 1 | x3 | walking | DF093188 |
| TM0013 | SSR   | 6 | 36.9 | CM0013 | LjT14O07  | 3 | x5 | seed    | DF093188 |
|        |       | 6 |      | CM0013 | LjB11I22  | 1 | x3 | walking | DF093188 |
| TM0420 | SSR   | 6 | 36.9 | CM0420 | LjT01K23  | 1 | x3 | seed    | DF093416 |
|        |       | 6 |      | CM0420 | LjB26H19  | 1 | x3 | walking | DF093416 |
| TM1546 | SSR   | 6 | 37.7 | CM0420 | LjT02A23  | 1 | x3 | seed    | DF093416 |
|        |       | 6 |      | CM0137 | LjB11L23  | 1 | x3 | walking | DF093285 |
| TM0137 | dCAPS | 6 | 37.7 | CM0137 | LjT46P17  | 3 | x5 | seed    | DF093285 |
| TM0778 | SSR   | 6 | 38.5 |        | LjT10I04  | 1 | x3 | seed    | AP010082 |
| TM0045 | SSR   | 6 | 38.9 | CM0045 | LjT14B06  | 3 | x5 | seed    | DF093214 |
|        |       | 6 |      | CM0045 | LjT46L22  | 1 | x3 | walking | DF093214 |
| TM0830 | SSR   | 6 | 38.9 |        | LjT36L14  | 1 | x3 | seed    | AP010101 |
| TM0880 | SSR   | 6 | 41.7 |        | LjT34O10  | 1 | x3 | seed    | AP010122 |
| TM0957 | SSR   | 6 | 45.0 |        | LjT35H04  | 1 | x3 | seed    | AP010137 |
|        |       | 6 |      | CM0437 | LjT40C18  | 1 | x5 | walking | DF093422 |
| TM0437 | SSR   | 6 | 46.6 | CM0437 | LjT04L20  | 3 | x5 | seed    | DF093422 |
|        |       | 6 |      | CM0437 | LjT34G23  | 1 | x3 | walking | DF093422 |
| TM0367 | SSR   | 6 | 46.6 |        | LjT16B20  | 3 | x5 | seed    | AP009670 |
| TM0630 | SSR   | 6 | 46.6 |        | LjT02P05  | 1 | x3 | seed    | AP010029 |
| TM1657 | SSR   | 6 | 46.6 |        | LjT36O06  | 1 | x3 | seed    | AP010244 |
|        |       | 6 |      | CM0139 | LjT34J02  | 1 | x3 | seed    | DF093286 |
| TM1116 | SSR   | 6 | 46.6 | CM0139 | LjT16M07  | 1 | x3 | walking | DF093286 |
|        |       | 6 |      | CM0139 | LjB141N22 | 1 | x3 | walking | DF093286 |
| TM0139 | SSR   | 6 | 46.6 | CM0139 | LjT19B18  | 3 | x5 | seed    | DF093286 |

|        |       |   |      |        |          |   |    |         |          |
|--------|-------|---|------|--------|----------|---|----|---------|----------|
|        |       | 6 |      | CM0139 | LjT27H06 | 1 | x3 | walking | DF093286 |
| TM1525 | SSR   | 6 | 46.6 | CM0139 | LjT19N13 | 1 | x3 | walking | DF093286 |
|        |       | 6 |      | CM0539 | LjT26K17 | 1 | x3 | walking | DF093442 |
| TM1035 | SSR   | 6 | 46.6 | CM0539 | LjT42E12 | 1 | x3 | seed    | DF093442 |
|        |       | 6 |      | CM1829 | LjT34E13 | 3 | x5 | walking | DF093530 |
| TM1829 | SSR   | 6 | 46.6 | CM1829 | LjT05H22 | 3 | x5 | seed    | DF093530 |
|        |       | 6 |      | CM0066 | LjT03J20 | 1 | x5 | walking | DF093233 |
| TM0066 | SSR   | 6 | 46.6 | CM0066 | LjT12N11 | 3 | x5 | seed    | DF093233 |
| TM0402 | SSR   | 6 | 46.6 | CM0066 | LjT33G10 | 1 | x3 | seed    | DF093233 |
|        |       | 6 |      | CM0066 | LjT21L21 | 1 | x5 | walking | DF093233 |
| BM1377 | SSR   | 6 | 47.4 | CM0066 | LjB01J04 | 3 | x5 | seed    | DF093233 |
| TM0756 | SSR   | 6 | 49.9 |        | LjT15B19 | 1 | x3 | seed    | AP010076 |
|        |       | 6 |      | CM0118 | LjT56H16 | 1 | x3 | walking | DF093269 |
| TM0228 | SSR   | 6 | 51.1 | CM0118 | LjT31L24 | 3 | x5 | seed    | DF093269 |
|        |       | 6 |      | CM0118 | LjB13A04 | 1 | x5 | seed    | DF093269 |
| TM0118 | SSR   | 6 | 51.1 | CM0118 | LjT48M22 | 3 | x5 | seed    | DF093269 |
|        |       | 6 |      | CM0118 | LjT06P22 | 1 | x3 | walking | DF093269 |
| TM1763 | SSR   | 6 | 55.2 |        | LjT03K02 | 3 | x5 | seed    | AP009707 |
| TM0301 | SSR   | 6 | 55.6 | CM0114 | LjT29C05 | 3 | x5 | seed    | DF093266 |
|        |       | 6 |      | CM0114 | LjT42C13 | 1 | x3 | walking | DF093266 |
| TM0114 | dCAPS | 6 | 57.2 | CM0114 | LjT19M07 | 3 | x5 | seed    | DF093266 |
| TM0336 | SSR   | 6 | 57.6 |        | LjT04E21 | 3 | x5 | seed    | AP009668 |
|        |       | 6 |      | CM0055 | LjT25K23 | 1 | x3 | walking | DF093222 |
| TM0055 | SSR   | 6 | 61.5 | CM0055 | LjT05E07 | 3 | x5 | seed    | DF093222 |
|        |       | 6 |      | CM0055 | LjT07N01 | 1 | x3 | seed    | DF093222 |

|        |     |   |      |        |          |   |    |         |          |
|--------|-----|---|------|--------|----------|---|----|---------|----------|
|        |     | 6 |      | CM0055 | LjT30C23 | 1 | x3 | seed    | DF093222 |
| BM1484 | SSR | 6 | 63.4 | CM0055 | LjB69N14 | 1 | x3 | walking | DF093222 |
|        |     | 6 |      | CM0055 | LjT13B14 | 1 | x3 | walking | DF093222 |
|        |     | 6 |      | CM0055 | LjT23F02 | 3 | x5 | walking | DF093222 |
|        |     | 6 |      | CM0314 | LjT29P24 | 1 | x3 | seed    | DF093380 |
| TM0314 | SSR | 6 | 65.3 | CM0314 | LjT13E04 | 3 | x5 | seed    | DF093380 |
| TM0582 | SSR | 6 | 66.2 | CM0314 | LjT40A10 | 1 | x3 | seed    | DF093380 |
| TM1825 | SSR | 6 | 66.6 | CM0314 | LjT04K06 | 3 | x5 | walking | DF093380 |
| TM1240 | SSR | 6 | 66.6 | CM0314 | LjT33P12 | 1 | x3 | seed    | DF093380 |
| TM0508 | SSR | 6 | 67.0 |        | LjT09E22 | 1 | x3 | seed    | AP009998 |
|        |     | 6 |      | CM0885 | LjT39N07 | 3 | x5 | walking | DF093493 |
| TM0885 | SSR | 6 | 67.4 | CM0885 | LjT45B09 | 3 | x3 | seed    | DF093493 |
| BM1560 | SSR | 6 | 67.4 | CM0885 | LjB12M17 | 1 | x3 | walking | DF093493 |
|        |     |   |      | CM0300 | LjT33M01 | 3 | x5 | seed    | DF093372 |
|        |     |   |      | CM0300 | LjB11F20 | 1 | x3 | walking | DF093372 |
|        |     |   |      | CM0319 | LjT20H21 | 3 | x5 | seed    | DF093384 |
|        |     |   |      | CM0319 | LjT17K05 | 1 | x3 | walking | DF093384 |
|        |     |   |      | CM0325 | LjT18C01 | 1 | x3 | walking | DF093388 |
|        |     |   |      | CM0325 | LjT38O11 | 3 | x5 | seed    | DF093388 |
|        |     |   |      | CM0385 | LjT15M15 | 1 | x3 | seed    | DF093407 |
|        |     |   |      | CM0385 | LjT38I10 | 1 | x3 | seed    | DF093407 |
|        |     |   |      | CM0457 | LjT12L18 | 1 | x3 | seed    | DF093427 |
|        |     |   |      | CM0457 | LjB12F21 | 1 | x3 | walking | DF093427 |
|        |     |   |      | CM0458 | LjT17P12 | 1 | x3 | seed    | DF093428 |
|        |     |   |      | CM0458 | LjT36F18 | 1 | x5 | seed    | DF093428 |



|  |  |  |  |        |          |   |    |         |          |
|--|--|--|--|--------|----------|---|----|---------|----------|
|  |  |  |  | CM0466 | LjT26I04 | 1 | x3 | seed    | DF093430 |
|  |  |  |  | CM0466 | LjB03D18 | 3 | x5 | walking | DF093430 |
|  |  |  |  | CM0528 | LjT30D10 | 1 | x3 | seed    | DF093440 |
|  |  |  |  | CM0528 | LjT07F08 | 1 | x3 | walking | DF093440 |
|  |  |  |  | CM0547 | LjT14A12 | 3 | x5 | seed    | DF093445 |
|  |  |  |  | CM0547 | LjT07M13 | 1 | x3 | seed    | DF093445 |
|  |  |  |  | CM0584 | LjB10M13 | 1 | x3 | walking | DF093451 |
|  |  |  |  | CM0584 | LjT29K06 | 1 | x3 | seed    | DF093451 |
|  |  |  |  | CM0584 | LjT45B13 | 1 | x3 | seed    | DF093451 |
|  |  |  |  | CM0601 | LjT42G24 | 1 | x3 | seed    | DF093456 |
|  |  |  |  | CM0601 | LjT06P01 | 1 | x3 | seed    | DF093456 |
|  |  |  |  | CM0693 | LjT27N15 | 1 | x3 | walking | DF093471 |
|  |  |  |  | CM0693 | LjT09F15 | 1 | x3 | seed    | DF093471 |
|  |  |  |  | CM0905 | LjT46C08 | 1 | x3 | seed    | DF093496 |
|  |  |  |  | CM0905 | LjT39N15 | 1 | x5 | seed    | DF093496 |
|  |  |  |  | CM1092 | LjT10F22 | 3 | x5 | seed    | DF093505 |
|  |  |  |  | CM1092 | LjT44E18 | 3 | x5 | seed    | DF093505 |
|  |  |  |  | CM1102 | LjT09P09 | 1 | x3 | seed    | DF093506 |
|  |  |  |  | CM1102 | LjT52I02 | 1 | x3 | walking | DF093506 |
|  |  |  |  | CM1324 | LjT05G19 | 1 | x3 | seed    | DF093512 |
|  |  |  |  | CM1324 | LjT34I23 | 1 | x3 | seed    | DF093512 |
|  |  |  |  | CM1489 | LjT14H03 | 3 | x5 | seed    | DF093518 |
|  |  |  |  | CM1489 | LjT21K14 | 3 | x5 | seed    | DF093518 |
|  |  |  |  | CM1729 | LjT15F22 | 3 | x5 | seed    | DF093525 |
|  |  |  |  | CM1729 | LjT18K19 | 3 | x5 | seed    | DF093525 |

|  |  |  |  |        |          |   |    |         |                             |
|--|--|--|--|--------|----------|---|----|---------|-----------------------------|
|  |  |  |  | CM1835 | LjT17J13 | 3 | x5 | seed    | DF093531                    |
|  |  |  |  | CM1835 | LjT38M11 | 3 | x5 | seed    | DF093531                    |
|  |  |  |  | CM1875 | LjT33A23 | 3 | x5 | walking | DF093532                    |
|  |  |  |  | CM1875 | LjT45G01 | 3 | x5 | seed    | DF093532                    |
|  |  |  |  | CM1875 | LjT19P08 | 3 | x5 | walking | DF093532                    |
|  |  |  |  | CM1887 | LjT46I13 | 2 | x5 | seed    | DF093534                    |
|  |  |  |  | CM1887 | LjT06N24 | 3 | x5 | seed    | DF093534                    |
|  |  |  |  | CM1983 | LjT40J16 | 3 | x5 | seed    | DF093536                    |
|  |  |  |  | CM1983 | LjT31L17 | 2 | x5 | seed    | DF093536                    |
|  |  |  |  |        | LjB17L21 | 1 | x3 | seed    | AP009940                    |
|  |  |  |  |        | LjB03J07 | 1 | x3 | seed    | AP009941                    |
|  |  |  |  |        | LjB18I11 | 1 | x3 | seed    | AP009942                    |
|  |  |  |  |        | LjB18O14 | 1 | x3 | seed    | AP009943                    |
|  |  |  |  |        | LjB01D01 | 3 | x5 | seed    | AP009625                    |
|  |  |  |  |        | LjB03P03 | 1 | x3 | seed    | AP009944                    |
|  |  |  |  |        | LjB15A13 | 1 | x5 | seed    | AP009947                    |
|  |  |  |  |        | LjB01J01 | 3 | x5 | seed    | AP009627                    |
|  |  |  |  |        | LjB12P21 | 3 | x5 | seed    | AP009631                    |
|  |  |  |  |        | LjB14K02 | 3 | x5 | seed    | AP009793(a),<br>AP009794(b) |
|  |  |  |  |        | LjB25I10 | 2 | x5 | seed    | AP009866                    |
|  |  |  |  |        | LjB16I02 | 3 | x5 | seed    | AP009634                    |
|  |  |  |  |        | LjB08M07 | 3 | x5 | seed    | AP009635                    |
|  |  |  |  |        | LjB12N13 | 3 | x5 | seed    | AP009636                    |
|  |  |  |  |        | LjB06H14 | 3 | x5 | seed    | AP009639                    |

|  |  |  |  |          |   |    |      |                                             |
|--|--|--|--|----------|---|----|------|---------------------------------------------|
|  |  |  |  | LjB22H06 | 3 | x5 | seed | AP009640                                    |
|  |  |  |  | LjB06P23 | 3 | x5 | seed | AP009642                                    |
|  |  |  |  | LjB09A03 | 3 | x5 | seed | AP009643                                    |
|  |  |  |  | LjB15P09 | 3 | x5 | seed | AP009644                                    |
|  |  |  |  | LjB12O06 | 3 | x5 | seed | AP009646                                    |
|  |  |  |  | LjB10M19 | 2 | x5 | seed | AP009867                                    |
|  |  |  |  | LjB06N21 | 2 | x5 | seed | AP009868                                    |
|  |  |  |  | LjT12M13 | 3 | x5 | seed | AP009797(a),<br>AP009798(b)                 |
|  |  |  |  | LjT06N06 | 1 | x5 | seed | AP009948                                    |
|  |  |  |  | LjT33A04 | 3 | x5 | seed | AP009653                                    |
|  |  |  |  | LjT22N02 | 1 | x5 | seed | AP009952                                    |
|  |  |  |  | LjT18J11 | 3 | x5 | seed | AP009803(a),<br>AP009804(b)                 |
|  |  |  |  | LjT31N18 | 1 | x3 | seed | AP009957                                    |
|  |  |  |  | LjT26C04 | 1 | x3 | seed | AP009958                                    |
|  |  |  |  | LjT24P23 | 3 | x5 | seed | AP009813(a),<br>AP009814(b),<br>AP009815(c) |
|  |  |  |  | LjT31F05 | 1 | x3 | seed | AP009962                                    |
|  |  |  |  | LjT02J24 | 3 | x5 | seed | AP009673                                    |
|  |  |  |  | LjT39P23 | 1 | x3 | seed | AP009966                                    |
|  |  |  |  | LjT34F04 | 1 | x3 | seed | AP009968                                    |
|  |  |  |  | LjT17O07 | 1 | x3 | seed | AP009969                                    |
|  |  |  |  | LjT41B20 | 1 | x3 | seed | AP009973                                    |
|  |  |  |  | LjT29P04 | 1 | x3 | seed | AP009978                                    |

|  |  |  |  |          |   |    |      |                             |
|--|--|--|--|----------|---|----|------|-----------------------------|
|  |  |  |  | LjT39H03 | 1 | x3 | seed | AP009979                    |
|  |  |  |  | LjT03K24 | 1 | x3 | seed | AP009980                    |
|  |  |  |  | LjT28H23 | 1 | x3 | seed | AP009981                    |
|  |  |  |  | LjT33C23 | 1 | x3 | seed | AP009982                    |
|  |  |  |  | LjT10D02 | 1 | x3 | seed | AP009984                    |
|  |  |  |  | LjT06M01 | 1 | x3 | seed | AP009986                    |
|  |  |  |  | LjT45L18 | 1 | x3 | seed | AP009987                    |
|  |  |  |  | LjT37C05 | 1 | x3 | seed | AP009988                    |
|  |  |  |  | LjT06I09 | 1 | x3 | seed | AP009990                    |
|  |  |  |  | LjT35E03 | 1 | x3 | seed | AP009992                    |
|  |  |  |  | LjT02G13 | 3 | x5 | seed | AP009827(a),<br>AP009828(b) |
|  |  |  |  | LjT30I08 | 3 | x5 | seed | AP009676                    |
|  |  |  |  | LjT25P15 | 1 | x3 | seed | AP009993                    |
|  |  |  |  | LjT18N19 | 1 | x3 | seed | AP009995                    |
|  |  |  |  | LjT34L13 | 1 | x3 | seed | AP010004                    |
|  |  |  |  | LjT42G13 | 1 | x3 | seed | AP010006                    |
|  |  |  |  | LjT35D08 | 1 | x3 | seed | AP010007                    |
|  |  |  |  | LjT33K05 | 1 | x3 | seed | AP010010                    |
|  |  |  |  | LjT30N04 | 1 | x3 | seed | AP010011                    |
|  |  |  |  | LjT06C12 | 1 | x3 | seed | AP010014                    |
|  |  |  |  | LjT13J03 | 1 | x3 | seed | AP010015                    |
|  |  |  |  | LjT01F24 | 1 | x3 | seed | AP010016                    |
|  |  |  |  | LjT41H24 | 1 | x3 | seed | AP010018                    |
|  |  |  |  | LjT10A21 | 1 | x3 | seed | AP010019                    |

|  |  |  |  |          |   |    |      |          |
|--|--|--|--|----------|---|----|------|----------|
|  |  |  |  | LjT35C01 | 1 | x3 | seed | AP010021 |
|  |  |  |  | LjT48C16 | 1 | x3 | seed | AP010022 |
|  |  |  |  | LjT46I09 | 1 | x3 | seed | AP010023 |
|  |  |  |  | LjT04C06 | 1 | x3 | seed | AP010027 |
|  |  |  |  | LjT44F13 | 1 | x3 | seed | AP010028 |
|  |  |  |  | LjT37D10 | 1 | x3 | seed | AP010030 |
|  |  |  |  | LjT34K24 | 1 | x3 | seed | AP010033 |
|  |  |  |  | LjT47I02 | 1 | x3 | seed | AP010034 |
|  |  |  |  | LjT35B07 | 1 | x3 | seed | AP010035 |
|  |  |  |  | LjT45A20 | 1 | x3 | seed | AP010036 |
|  |  |  |  | LjT10O10 | 1 | x3 | seed | AP010037 |
|  |  |  |  | LjT16H12 | 1 | x3 | seed | AP010038 |
|  |  |  |  | LjT35J12 | 1 | x3 | seed | AP010040 |
|  |  |  |  | LjT30N24 | 1 | x3 | seed | AP010044 |
|  |  |  |  | LjT39B13 | 3 | x5 | seed | AP009679 |
|  |  |  |  | LjT30N18 | 1 | x3 | seed | AP010046 |
|  |  |  |  | LjT04N09 | 1 | x3 | seed | AP010047 |
|  |  |  |  | LjT37O09 | 1 | x3 | seed | AP010050 |
|  |  |  |  | LjT15N18 | 1 | x3 | seed | AP010052 |
|  |  |  |  | LjT41D10 | 1 | x3 | seed | AP010054 |
|  |  |  |  | LjT17C10 | 1 | x3 | seed | AP010055 |
|  |  |  |  | LjT35E05 | 1 | x3 | seed | AP010058 |
|  |  |  |  | LjT05A08 | 1 | x3 | seed | AP010059 |
|  |  |  |  | LjT02K08 | 1 | x3 | seed | AP010060 |
|  |  |  |  | LjT38J19 | 1 | x3 | seed | AP010061 |

|  |  |  |  |          |   |    |      |          |
|--|--|--|--|----------|---|----|------|----------|
|  |  |  |  | LjT17B03 | 1 | x3 | seed | AP010062 |
|  |  |  |  | LjT13N04 | 1 | x3 | seed | AP010064 |
|  |  |  |  | LjT23J20 | 3 | x5 | seed | AP009680 |
|  |  |  |  | LjT46A12 | 1 | x3 | seed | AP010065 |
|  |  |  |  | LjT10P12 | 1 | x3 | seed | AP010068 |
|  |  |  |  | LjT03D12 | 1 | x3 | seed | AP010072 |
|  |  |  |  | LjT09A12 | 1 | x3 | seed | AP010073 |
|  |  |  |  | LjT38P01 | 1 | x3 | seed | AP010075 |
|  |  |  |  | LjT13F18 | 1 | x3 | seed | AP010077 |
|  |  |  |  | LjT33M20 | 1 | x3 | seed | AP010078 |
|  |  |  |  | LjT07P21 | 1 | x3 | seed | AP010079 |
|  |  |  |  | LjT10E17 | 1 | x3 | seed | AP010080 |
|  |  |  |  | LjT16L08 | 1 | x3 | seed | AP010081 |
|  |  |  |  | LjT10F13 | 1 | x3 | seed | AP010083 |
|  |  |  |  | LjT39N06 | 1 | x3 | seed | AP010086 |
|  |  |  |  | LjT16I12 | 1 | x3 | seed | AP010088 |
|  |  |  |  | LjT45D24 | 1 | x3 | seed | AP010090 |
|  |  |  |  | LjT36E16 | 1 | x3 | seed | AP010092 |
|  |  |  |  | LjT03L21 | 1 | x3 | seed | AP010094 |
|  |  |  |  | LjT29E04 | 1 | x3 | seed | AP010095 |
|  |  |  |  | LjT11B21 | 1 | x3 | seed | AP010098 |
|  |  |  |  | LjT19F24 | 1 | x3 | seed | AP010100 |
|  |  |  |  | LjT30L14 | 1 | x3 | seed | AP010102 |
|  |  |  |  | LjT44F11 | 1 | x3 | seed | AP010104 |
|  |  |  |  | LjT13K07 | 1 | x3 | seed | AP010105 |

|  |  |  |  |          |   |    |      |                             |
|--|--|--|--|----------|---|----|------|-----------------------------|
|  |  |  |  | LjT45M09 | 1 | x3 | seed | AP010107                    |
|  |  |  |  | LjT36B17 | 1 | x3 | seed | AP010108                    |
|  |  |  |  | LjT48O18 | 1 | x3 | seed | AP010111                    |
|  |  |  |  | LjT48K17 | 1 | x3 | seed | AP010112                    |
|  |  |  |  | LjT29B06 | 1 | x3 | seed | AP010113                    |
|  |  |  |  | LjT14M06 | 1 | x3 | seed | AP010116                    |
|  |  |  |  | LjT15F17 | 1 | x3 | seed | AP010119                    |
|  |  |  |  | LjT22M20 | 1 | x3 | seed | AP010121                    |
|  |  |  |  | LjT16G18 | 1 | x3 | seed | AP010124                    |
|  |  |  |  | LjT07P16 | 1 | x5 | seed | AP010125                    |
|  |  |  |  | LjT43K05 | 1 | x3 | seed | AP010126                    |
|  |  |  |  | LjT02N03 | 1 | x3 | seed | AP010129                    |
|  |  |  |  | LjT38B24 | 1 | x3 | seed | AP010131                    |
|  |  |  |  | LjT03D05 | 1 | x3 | seed | AP010132                    |
|  |  |  |  | LjT10J09 | 1 | x3 | seed | AP010133                    |
|  |  |  |  | LjT47D03 | 1 | x3 | seed | AP010134                    |
|  |  |  |  | LjT14H02 | 1 | x3 | seed | AP010135                    |
|  |  |  |  | LjT19A14 | 1 | x3 | seed | AP010136                    |
|  |  |  |  | LjT46P10 | 1 | x3 | seed | AP010139                    |
|  |  |  |  | LjT25F20 | 1 | x3 | seed | AP010140                    |
|  |  |  |  | LjT38E08 | 1 | x3 | seed | AP010143                    |
|  |  |  |  | LjT32M01 | 1 | x3 | seed | AP010145                    |
|  |  |  |  | LjT04E07 | 3 | x5 | seed | AP009683                    |
|  |  |  |  | LjT33L17 | 3 | x5 | seed | AP009835(a),<br>AP009836(b) |

|  |  |  |  |          |   |    |      |          |
|--|--|--|--|----------|---|----|------|----------|
|  |  |  |  | LjT18K22 | 3 | x5 | seed | AP009684 |
|  |  |  |  | LjT37H17 | 1 | x5 | seed | AP010146 |
|  |  |  |  | LjT10H22 | 1 | x3 | seed | AP010147 |
|  |  |  |  | LjT21I06 | 1 | x3 | seed | AP010148 |
|  |  |  |  | LjT20L14 | 1 | x3 | seed | AP010150 |
|  |  |  |  | LjT38L02 | 1 | x3 | seed | AP010151 |
|  |  |  |  | LjT42I15 | 1 | x3 | seed | AP010152 |
|  |  |  |  | LjT01E03 | 1 | x5 | seed | AP010153 |
|  |  |  |  | LjT37G19 | 3 | x5 | seed | AP009685 |
|  |  |  |  | LjT33J24 | 1 | x3 | seed | AP010156 |
|  |  |  |  | LjT48K13 | 1 | x5 | seed | AP010157 |
|  |  |  |  | LjT34B08 | 1 | x3 | seed | AP010159 |
|  |  |  |  | LjT48O01 | 1 | x3 | seed | AP010160 |
|  |  |  |  | LjT46F23 | 1 | x3 | seed | AP010161 |
|  |  |  |  | LjT07C14 | 1 | x3 | seed | AP010165 |
|  |  |  |  | LjT16O05 | 1 | x3 | seed | AP010166 |
|  |  |  |  | LjT08D05 | 1 | x3 | seed | AP010167 |
|  |  |  |  | LjT35F01 | 1 | x3 | seed | AP010169 |
|  |  |  |  | LjT05F15 | 1 | x3 | seed | AP010170 |
|  |  |  |  | LjT07J01 | 2 | x3 | seed | AP009869 |
|  |  |  |  | LjT31K10 | 1 | x3 | seed | AP010171 |
|  |  |  |  | LjT31M07 | 1 | x3 | seed | AP010172 |
|  |  |  |  | LjT15A14 | 1 | x3 | seed | AP010175 |
|  |  |  |  | LjT01P07 | 1 | x3 | seed | AP010179 |
|  |  |  |  | LjT47C13 | 1 | x3 | seed | AP010181 |



|  |  |  |  |          |   |    |      |          |
|--|--|--|--|----------|---|----|------|----------|
|  |  |  |  | LjT19N22 | 1 | x3 | seed | AP010182 |
|  |  |  |  | LjT40B16 | 3 | x5 | seed | AP009689 |
|  |  |  |  | LjT18L24 | 2 | x5 | seed | AP009870 |
|  |  |  |  | LjT06J23 | 1 | x3 | seed | AP010185 |
|  |  |  |  | LjT44J06 | 1 | x3 | seed | AP010186 |
|  |  |  |  | LjT22N06 | 1 | x3 | seed | AP010189 |
|  |  |  |  | LjT04I16 | 1 | x3 | seed | AP010191 |
|  |  |  |  | LjT12A09 | 1 | x3 | seed | AP010192 |
|  |  |  |  | LjT12E12 | 1 | x3 | seed | AP010193 |
|  |  |  |  | LjT01K14 | 1 | x3 | seed | AP010194 |
|  |  |  |  | LjT14E02 | 1 | x3 | seed | AP010196 |
|  |  |  |  | LjT41F16 | 1 | x3 | seed | AP010200 |
|  |  |  |  | LjT45I18 | 1 | x3 | seed | AP010201 |
|  |  |  |  | LjT22H07 | 1 | x3 | seed | AP010203 |
|  |  |  |  | LjT11H16 | 1 | x3 | seed | AP010204 |
|  |  |  |  | LjT05D15 | 1 | x3 | seed | AP010205 |
|  |  |  |  | LjT28H08 | 1 | x3 | seed | AP010207 |
|  |  |  |  | LjT03E06 | 1 | x3 | seed | AP010210 |
|  |  |  |  | LjT28K11 | 1 | x3 | seed | AP010211 |
|  |  |  |  | LjT09J04 | 1 | x3 | seed | AP010212 |
|  |  |  |  | LjT36K06 | 1 | x3 | seed | AP010213 |
|  |  |  |  | LjT22H02 | 3 | x5 | seed | AP009691 |
|  |  |  |  | LjT35F06 | 1 | x5 | seed | AP010214 |
|  |  |  |  | LjT17I13 | 1 | x3 | seed | AP010215 |
|  |  |  |  | LjT04D09 | 1 | x3 | seed | AP010218 |

|  |  |  |  |          |   |    |      |                             |
|--|--|--|--|----------|---|----|------|-----------------------------|
|  |  |  |  | LjT28O03 | 2 | x3 | seed | AP009871                    |
|  |  |  |  | LjT26P12 | 2 | x3 | seed | AP009872                    |
|  |  |  |  | LjT01D09 | 1 | x3 | seed | AP010221                    |
|  |  |  |  | LjT32E09 | 1 | x3 | seed | AP010222                    |
|  |  |  |  | LjT48H14 | 1 | x3 | seed | AP010223                    |
|  |  |  |  | LjT15I01 | 1 | x3 | seed | AP010224                    |
|  |  |  |  | LjT17L12 | 1 | x3 | seed | AP010225                    |
|  |  |  |  | LjT31N05 | 1 | x3 | seed | AP010226                    |
|  |  |  |  | LjT24M05 | 3 | x5 | seed | AP009693                    |
|  |  |  |  | LjT19D10 | 3 | x5 | seed | AP009694                    |
|  |  |  |  | LjT35G18 | 1 | x3 | seed | AP010231                    |
|  |  |  |  | LjT03L06 | 1 | x3 | seed | AP010232                    |
|  |  |  |  | LjT02D24 | 3 | x5 | seed | AP009846(a),<br>AP009847(b) |
|  |  |  |  | LjT28I10 | 1 | x3 | seed | AP010237                    |
|  |  |  |  | LjT03L03 | 1 | x3 | seed | AP010239                    |
|  |  |  |  | LjT03D14 | 1 | x5 | seed | AP010241                    |
|  |  |  |  | LjT44L11 | 1 | x3 | seed | AP010243                    |
|  |  |  |  | LjT48F24 | 1 | x3 | seed | AP010246                    |
|  |  |  |  | LjT22I05 | 1 | x3 | seed | AP010247                    |
|  |  |  |  | LjT15O11 | 1 | x3 | seed | AP010251                    |
|  |  |  |  | LjT07B02 | 1 | x3 | seed | AP010252                    |
|  |  |  |  | LjT06P13 | 1 | x3 | seed | AP010253                    |
|  |  |  |  | LjT04K03 | 1 | x3 | seed | AP010254                    |
|  |  |  |  | LjT08P02 | 3 | x5 | seed | AP009695                    |

|  |  |  |  |          |   |    |      |                             |
|--|--|--|--|----------|---|----|------|-----------------------------|
|  |  |  |  | LjT10C23 | 3 | x5 | seed | AP009697                    |
|  |  |  |  | LjT10I01 | 3 | x5 | seed | AP009850(a),<br>AP009851(b) |
|  |  |  |  | LjT02O17 | 3 | x5 | seed | AP009698                    |
|  |  |  |  | LjT24A04 | 3 | x5 | seed | AP009699                    |
|  |  |  |  | LjT48K02 | 3 | x5 | seed | AP009700                    |
|  |  |  |  | LjT31G10 | 3 | x5 | seed | AP009701                    |
|  |  |  |  | LjT43O20 | 2 | x5 | seed | AP009875                    |
|  |  |  |  | LjT18C07 | 3 | x5 | seed | AP009854(a),<br>AP009855(b) |
|  |  |  |  | LjT02A08 | 3 | x5 | seed | AP009705                    |
|  |  |  |  | LjT28B05 | 3 | x5 | seed | AP009706                    |
|  |  |  |  | LjT32D02 | 3 | x5 | seed | AP009708                    |
|  |  |  |  | LjT38E14 | 1 | x5 | seed | AP010255                    |
|  |  |  |  | LjT14E23 | 3 | x5 | seed | AP009712                    |
|  |  |  |  | LjT37K03 | 3 | x5 | seed | AP009713                    |
|  |  |  |  | LjT08O01 | 3 | x5 | seed | AP009714                    |
|  |  |  |  | LjT24E04 | 3 | x5 | seed | AP009860(a),<br>AP009861(b) |
|  |  |  |  | LjT11K12 | 3 | x5 | seed | AP009715                    |
|  |  |  |  | LjT06I10 | 3 | x5 | seed | AP009718                    |
|  |  |  |  | LjT28H07 | 3 | x5 | seed | AP009719                    |
|  |  |  |  | LjT17C09 | 3 | x5 | seed | AP009721                    |
|  |  |  |  | LjT42E21 | 3 | x5 | seed | AP009722                    |
|  |  |  |  | LjT39G17 | 3 | x5 | seed | AP009723                    |
|  |  |  |  | LjT43D04 | 3 | x5 | seed | AP009724                    |

|  |  |  |  |          |   |    |      |          |
|--|--|--|--|----------|---|----|------|----------|
|  |  |  |  | LjT04G17 | 3 | x5 | seed | AP009726 |
|  |  |  |  | LjT13L04 | 3 | x5 | seed | AP009727 |
|  |  |  |  | LjT35D18 | 3 | x5 | seed | AP009728 |
|  |  |  |  | LjT13F07 | 2 | x5 | seed | AP009876 |
|  |  |  |  | LjT15D07 | 3 | x5 | seed | AP009734 |
|  |  |  |  | LjT37E04 | 3 | x5 | seed | AP009735 |
|  |  |  |  | LjT31N04 | 3 | x5 | seed | AP009736 |
|  |  |  |  | LjT06B16 | 3 | x5 | seed | AP009738 |
|  |  |  |  | LjT06I13 | 3 | x5 | seed | AP009739 |
|  |  |  |  | LjT43N20 | 3 | x5 | seed | AP009742 |
|  |  |  |  | LjT30L13 | 3 | x5 | seed | AP009744 |
|  |  |  |  | LjT25I18 | 3 | x5 | seed | AP009745 |
|  |  |  |  | LjT40A21 | 3 | x5 | seed | AP009747 |
|  |  |  |  | LjT43F20 | 2 | x5 | seed | AP009878 |
|  |  |  |  | LjT24E19 | 3 | x5 | seed | AP009749 |
|  |  |  |  | LjT36L22 | 2 | x5 | seed | AP009880 |
|  |  |  |  | LjT17E11 | 3 | x5 | seed | AP009751 |
|  |  |  |  | LjT04A22 | 3 | x5 | seed | AP009753 |
|  |  |  |  | LjT25G12 | 3 | x5 | seed | AP009754 |
|  |  |  |  | LjT38B21 | 3 | x5 | seed | AP009756 |
|  |  |  |  | LjT14D09 | 3 | x5 | seed | AP009757 |
|  |  |  |  | LjT18D07 | 3 | x5 | seed | AP009758 |
|  |  |  |  | LjT16E14 | 3 | x5 | seed | AP009759 |
|  |  |  |  | LjT39M20 | 3 | x5 | seed | AP009760 |
|  |  |  |  | LjT05F19 | 3 | x5 | seed | AP009761 |

|  |  |  |  |          |   |    |      |          |
|--|--|--|--|----------|---|----|------|----------|
|  |  |  |  | LjT01K02 | 3 | x5 | seed | AP009762 |
|  |  |  |  | LjT09J11 | 3 | x5 | seed | AP009763 |
|  |  |  |  | LjT21I18 | 3 | x5 | seed | AP009765 |
|  |  |  |  | LjT40J14 | 3 | x5 | seed | AP009766 |
|  |  |  |  | LjT39F13 | 3 | x5 | seed | AP009767 |
|  |  |  |  | LjT40E15 | 3 | x5 | seed | AP009768 |
|  |  |  |  | LjT13A22 | 3 | x5 | seed | AP009769 |
|  |  |  |  | LjT15D16 | 3 | x5 | seed | AP009770 |
|  |  |  |  | LjT20A21 | 3 | x5 | seed | AP009771 |
|  |  |  |  | LjT07I16 | 3 | x5 | seed | AP009772 |
|  |  |  |  | LjT09F21 | 3 | x5 | seed | AP009773 |
|  |  |  |  | LjT43M12 | 2 | x5 | seed | AP009882 |
|  |  |  |  | LjT31J09 | 2 | x5 | seed | AP009883 |
|  |  |  |  | LjT24C10 | 2 | x5 | seed | AP009884 |
|  |  |  |  | LjT10B22 | 2 | x5 | seed | AP009885 |
|  |  |  |  | LjT19C19 | 2 | x5 | seed | AP009886 |
|  |  |  |  | LjT01F21 | 3 | x5 | seed | AP009774 |
|  |  |  |  | LjT18N03 | 3 | x5 | seed | AP009776 |
|  |  |  |  | LjT13C08 | 3 | x5 | seed | AP009777 |
|  |  |  |  | LjT09J10 | 3 | x5 | seed | AP009778 |
|  |  |  |  | LjT34L14 | 3 | x5 | seed | AP009779 |
|  |  |  |  | LjT15C06 | 3 | x5 | seed | AP009781 |
|  |  |  |  | LjT26J05 | 3 | x5 | seed | AP009782 |
|  |  |  |  | LjT35F15 | 2 | x5 | seed | AP009888 |
|  |  |  |  | LjT01G11 | 2 | x5 | seed | AP009889 |

|  |  |  |  |          |   |    |      |          |
|--|--|--|--|----------|---|----|------|----------|
|  |  |  |  | LjT11A15 | 3 | x5 | seed | AP009784 |
|  |  |  |  | LjT41D08 | 2 | x5 | seed | AP009890 |
|  |  |  |  | LjT28A08 | 3 | x5 | seed | AP009786 |
|  |  |  |  | LjT40K11 | 3 | x5 | seed | AP009787 |
|  |  |  |  | LjT02J13 | 3 | x5 | seed | AP009788 |
|  |  |  |  | LjT15P09 | 3 | x5 | seed | AP009790 |
|  |  |  |  | LjT24E07 | 2 | x5 | seed | AP009891 |
|  |  |  |  | LjT24M21 | 2 | x5 | seed | AP009892 |
|  |  |  |  | LjT22N13 | 2 | x5 | seed | AP009893 |
|  |  |  |  | LjT27E22 | 2 | x5 | seed | AP009894 |
|  |  |  |  | LjT09I09 | 2 | x5 | seed | AP009895 |
|  |  |  |  | LjT41N19 | 2 | x5 | seed | AP009896 |
|  |  |  |  | LjT47N10 | 2 | x5 | seed | AP009897 |
|  |  |  |  | LjT06N02 | 2 | x5 | seed | AP009898 |
|  |  |  |  | LjT30J19 | 2 | x5 | seed | AP009899 |
|  |  |  |  | LjT39M07 | 2 | x5 | seed | AP009900 |
|  |  |  |  | LjT11L09 | 2 | x5 | seed | AP009901 |
|  |  |  |  | LjT10C06 | 2 | x5 | seed | AP009902 |
|  |  |  |  | LjT08G12 | 2 | x5 | seed | AP009903 |
|  |  |  |  | LjT10I14 | 2 | x5 | seed | AP009904 |
|  |  |  |  | LjT09C09 | 2 | x5 | seed | AP009905 |
|  |  |  |  | LjT04K19 | 2 | x5 | seed | AP009906 |
|  |  |  |  | LjT39O22 | 2 | x5 | seed | AP009907 |
|  |  |  |  | LjT06B04 | 2 | x5 | seed | AP009908 |
|  |  |  |  | LjT39A22 | 2 | x5 | seed | AP009909 |

|  |  |  |  |          |   |    |      |          |
|--|--|--|--|----------|---|----|------|----------|
|  |  |  |  | LjT46F13 | 2 | x5 | seed | AP009910 |
|  |  |  |  | LjT13J19 | 2 | x5 | seed | AP009911 |
|  |  |  |  | LjT36I04 | 2 | x5 | seed | AP009912 |
|  |  |  |  | LjT09O11 | 2 | x5 | seed | AP009913 |
|  |  |  |  | LjT45C19 | 2 | x5 | seed | AP009914 |
|  |  |  |  | LjT07K13 | 2 | x5 | seed | AP009915 |
|  |  |  |  | LjT43G14 | 2 | x5 | seed | AP009916 |
|  |  |  |  | LjT47B05 | 2 | x5 | seed | AP009917 |
|  |  |  |  | LjT35M05 | 2 | x5 | seed | AP009918 |
|  |  |  |  | LjT07J23 | 2 | x5 | seed | AP009919 |
|  |  |  |  | LjT31F12 | 2 | x5 | seed | AP009920 |
|  |  |  |  | LjT07L17 | 2 | x5 | seed | AP009921 |
|  |  |  |  | LjT41B11 | 2 | x5 | seed | AP009922 |
|  |  |  |  | LjT47H21 | 2 | x5 | seed | AP009923 |
|  |  |  |  | LjT13L03 | 2 | x5 | seed | AP009924 |
|  |  |  |  | LjT15A10 | 2 | x5 | seed | AP009925 |
|  |  |  |  | LjT04M14 | 2 | x5 | seed | AP009926 |
|  |  |  |  | LjT36B24 | 2 | x5 | seed | AP009927 |
|  |  |  |  | LjT30M06 | 2 | x5 | seed | AP009928 |
|  |  |  |  | LjT37I20 | 3 | x5 | seed | AP009791 |
|  |  |  |  | LjT42M11 | 3 | x5 | seed | AP009792 |
|  |  |  |  | LjT41B04 | 2 | x5 | seed | AP009929 |
|  |  |  |  | LjT48C01 | 2 | x5 | seed | AP009930 |
|  |  |  |  | LjT15B14 | 2 | x5 | seed | AP009931 |
|  |  |  |  | LjT16B12 | 2 | x5 | seed | AP009932 |

|  |  |  |  |          |   |    |      |          |
|--|--|--|--|----------|---|----|------|----------|
|  |  |  |  | LjT46P06 | 2 | x5 | seed | AP009933 |
|  |  |  |  | LjT32C22 | 2 | x5 | seed | AP009934 |
|  |  |  |  | LjT10I07 | 2 | x5 | seed | AP009935 |
|  |  |  |  | LjT09F05 | 2 | x5 | seed | AP009936 |
|  |  |  |  | LjT09K03 | 2 | x5 | seed | AP009937 |
|  |  |  |  | LjT43K18 | 2 | x5 | seed | AP009938 |
|  |  |  |  | LjT38D03 | 2 | x5 | seed | AP009939 |



**Supplemental Table 2.** Statistical analysis of the *L. japonicus* TGS assembly.

---

| Features                                   |             |
|--------------------------------------------|-------------|
| Total length of supercontigs (bases)       | 315,073,275 |
| GC content                                 | 37%         |
| Distribution of supercontig length (bases) |             |
| Min                                        | 276         |
| 1st quartile                               | 1,001       |
| Median                                     | 1,146       |
| 3rd quartile                               | 1,504       |
| Max                                        | 1,625,999   |
| Mean                                       | 2,927       |
| N50                                        | 92,311      |
| Anchored supercontigs                      |             |
| Number of anchored supercontigs            | 594         |
| Length of anchored supercontigs (bases)    | 130,251,279 |
| Unanchored supercontigs                    |             |
| Number of unanchored supercontigs          | 110,346     |
| Length of unanchored supercontigs (bases)  | 184,821,996 |

---

**Supplemental Table 3.** SSRs in the *L. japonicus* TGS.

| SSR pattern | SSR numbers in TGS | frequency in 100kb |       |         |         |         |
|-------------|--------------------|--------------------|-------|---------|---------|---------|
|             |                    | all TGS            | exon* | intron* | 5' UTR* | 3' UTR* |
| AT          | 10,375             | 3.20               | 0.64  | 3.82    | 8.44    | 9.49    |
| AG          | 4,881              | 1.50               | 0.55  | 3.00    | 8.30    | 8.21    |
| AC          | 1,118              | 0.34               | 0.14  | 1.59    | 1.47    | 1.52    |
| GC          | 4                  | 0.00               | 0.00  | 0.00    | 0.00    | 0.00    |
| AAG         | 4,125              | 1.27               | 3.44  | 0.80    | 5.46    | 5.23    |
| AAT         | 3,301              | 1.02               | 0.27  | 1.47    | 3.05    | 3.37    |
| GGT         | 2,665              | 0.82               | 3.00  | 0.43    | 1.68    | 1.95    |
| ATC         | 1,648              | 0.51               | 2.04  | 0.42    | 2.22    | 2.11    |
| AAC         | 1,383              | 0.43               | 1.95  | 0.95    | 1.66    | 1.66    |
| GGA         | 1,103              | 0.34               | 1.66  | 0.17    | 0.89    | 0.55    |
| AGC         | 329                | 0.10               | 1.10  | 0.04    | 0.21    | 0.20    |
| GGC         | 209                | 0.06               | 0.45  | 0.03    | 0.17    | 0.10    |
| ACT         | 166                | 0.05               | 0.16  | 0.10    | 0.23    | 0.30    |
| ACG         | 63                 | 0.02               | 0.15  | 0.00    | 0.06    | 0.12    |
| AAAT        | 1,088              | 0.34               | 0.06  | 0.67    | 1.27    | 1.24    |
| AAAG        | 354                | 0.11               | 0.04  | 0.20    | 0.62    | 0.37    |
| AATT        | 250                | 0.08               | 0.00  | 0.11    | 0.39    | 0.39    |
| AAAC        | 232                | 0.07               | 0.02  | 0.24    | 0.41    | 0.61    |
| AATG        | 177                | 0.05               | 0.06  | 0.09    | 0.21    | 0.37    |
| AATC        | 120                | 0.04               | 0.01  | 0.17    | 0.21    | 0.24    |
| GGA         | 49                 | 0.02               | 0.01  | 0.02    | 0.04    | 0.04    |
| AAGC        | 17                 | 0.01               | 0.01  | 0.01    | 0.04    | 0.02    |
| GGGT        | 16                 | 0.00               | 0.00  | 0.01    | 0.00    | 0.04    |
| GGAT        | 15                 | 0.00               | 0.02  | 0.01    | 0.00    | 0.08    |
| GAGC        | 14                 | 0.00               | 0.01  | 0.00    | 0.08    | 0.00    |
| AACG        | 9                  | 0.00               | 0.01  | 0.00    | 0.04    | 0.02    |
| GGCT        | 5                  | 0.00               | 0.00  | 0.00    | 0.00    | 0.02    |
| AGGT        | 3                  | 0.00               | 0.00  | 0.01    | 0.00    | 0.00    |
| GACT        | 3                  | 0.00               | 0.00  | 0.00    | 0.00    | 0.00    |
| GATC        | 3                  | 0.00               | 0.00  | 0.00    | 0.02    | 0.00    |
| GGAC        | 2                  | 0.00               | 0.00  | 0.00    | 0.00    | 0.02    |
| GGCA        | 2                  | 0.00               | 0.00  | 0.00    | 0.00    | 0.00    |
| AGGC        | 1                  | 0.00               | 0.00  | 0.00    | 0.02    | 0.00    |
| total       | 33,730             |                    |       |         |         |         |

\* exon and intron sequences were extracted from completely modeled genes in the TGS.  
5' UTR and 3' UTR sequences corresponds to 500bp upstream and downstream sequences of the completely modeled genes in the TGS.

**Supplemental Table 4.** Frequency of repetitive sequences in TAC/BAC end sequences, putative introns, and putative UTRs.

|                      | Fraction of TGS<br>(%) | Fraction of TAC/BAC<br>end sequences (%) | Fraction of intron<br>sequences (%) | Fraction of 3' UTR<br>sequences (%) | Fraction of 5' UTR<br>sequences (%) |
|----------------------|------------------------|------------------------------------------|-------------------------------------|-------------------------------------|-------------------------------------|
| Class I              |                        |                                          |                                     |                                     |                                     |
| SINEs                | 0.01%                  | 0.01%                                    | 0.04%                               | 0.02%                               | 0.00%                               |
| LINEs                | 1.19%                  | 0.68%                                    | 0.19%                               | 0.31%                               | 0.52%                               |
| LTR: Ty1/copia       | 7.16%                  | 10.76%                                   | 0.58%                               | 1.04%                               | 0.78%                               |
| LTR: Ty3/gypsy       | 8.81%                  | 9.64%                                    | 0.53%                               | 1.02%                               | 0.88%                               |
| Other LTR            | 2.05%                  | 1.74%                                    | 0.20%                               | 0.43%                               | 0.65%                               |
| total class I        | 19.23%                 | 22.84%                                   | 1.36%                               | 2.83%                               | 2.84%                               |
| Class II             |                        |                                          |                                     |                                     |                                     |
| coding class II      | 0.97%                  | 0.57%                                    | 0.19%                               | 0.52%                               | 0.69%                               |
| MITE                 | 2.33%                  | 1.38%                                    | 2.43%                               | 2.00%                               | 2.65%                               |
| total class II       | 3.31%                  | 1.95%                                    | 2.62%                               | 2.52%                               | 3.24%                               |
| Short tandem repeats | 1.31%                  | 9.93%                                    | 0.00%                               | 0.01%                               | 0.01%                               |
| Unclassified         | 10.43%                 | 10.56%                                   | 4.92%                               | 7.72%                               | 4.61%                               |

**Supplemental Table 5.** tRNA genes in the *L. japonicus* TGS.

| Anticodon | number of genes | gene name                                                                                                                                                                                                                                                                                                                                                                                                                                                                                                                                                                                                                                                                                                                                                                                       |
|-----------|-----------------|-------------------------------------------------------------------------------------------------------------------------------------------------------------------------------------------------------------------------------------------------------------------------------------------------------------------------------------------------------------------------------------------------------------------------------------------------------------------------------------------------------------------------------------------------------------------------------------------------------------------------------------------------------------------------------------------------------------------------------------------------------------------------------------------------|
| Ala(AGC)  | 10              | LjSGA_012590.1.1,LjSGA_014452.1.1,LjSGA_047922.0.1,LjSGA_057483.0.1,LjSGA_080936.0.1,chr1.CM0206.130.nd,chr1.CM0816.320.nc,chr3.CM0152.140.nc,chr4.CM0087.900.nd,chr4.CM0307.80.nc                                                                                                                                                                                                                                                                                                                                                                                                                                                                                                                                                                                                              |
| Ala(CGC)  | 4               | LjT41B04.130.nd,chr1.CM0039.110.nd,chr1.CM0544.330.nc,chr4.CM0025.370.nc                                                                                                                                                                                                                                                                                                                                                                                                                                                                                                                                                                                                                                                                                                                        |
| Ala(TGC)  | 10              | LjSGA_009813.1.1,LjSGA_016546.0.1,LjSGA_037526.0.1,LjSGA_078531.0.1,LjSGA_079854.0.1,LjT30N24.190.nd,chr1.CM0123.210.nc,chr2.CM0021.350.nc,chr4.CM0042.1330.nc,chr4.CM0244.240.nc                                                                                                                                                                                                                                                                                                                                                                                                                                                                                                                                                                                                               |
| Arg(ACG)  | 25              | LjSGA_012029.0.2,LjSGA_034758.0.1,LjSGA_061637.0.1,LjSGA_080502.0.1,LjSGA_089458.0.1,LjSGA_092923.0.1,LjSGA_095410.1.1,LjSGA_095609.1.2,LjSGA_098408.0.1,LjSGA_099551.1.2,LjSGA_108027.0.1,LjSGA_114244.0.1,LjSGA_123151.0.1,LjSGA_123559.0.1,LjSGA_127506.1.2,LjSGA_127544.0.1,LjSGA_133159.0.1,LjSGA_138405.0.1,LjT39A22.40.nd,chr1.CM0269.330.nc,chr2.CM0021.320.nc,chr3.CM0279.40.nd,chr4.LjT13D08.150.nd,chr4.LjT13D08.160.nd,chr4.LjT13D08.220.nd                                                                                                                                                                                                                                                                                                                                         |
| Arg(CCG)  | 2               | chr1.LjT04Q021.200.nd,chr2.CM0002.20.nd                                                                                                                                                                                                                                                                                                                                                                                                                                                                                                                                                                                                                                                                                                                                                         |
| Arg(CCT)  | 7               | LjSGA_014645.0.1,LjSGA_142541.0.1,chr1.LjB20I01.120.nd,chr2.CM0018.80.nc,chr3.CM0160.1020.nc,chr5.CM0180.210.nd,chr5.CM0852.270.nc                                                                                                                                                                                                                                                                                                                                                                                                                                                                                                                                                                                                                                                              |
| Arg(TCG)  | 4               | LjSGA_015112.0.1,LjSGA_021358.0.1,LjT03E06.160.nd,chr6.CM0885.80.nc                                                                                                                                                                                                                                                                                                                                                                                                                                                                                                                                                                                                                                                                                                                             |
| Arg(TCT)  | 7               | LjSGA_006242.1.1,LjSGA_013337.0.1,LjSGA_038272.0.1,LjT08D05.170.nd,chr1.LjT07G07.90.nc,chr1.LjT33H07.110.nd,chr5.CM0311.110.nc                                                                                                                                                                                                                                                                                                                                                                                                                                                                                                                                                                                                                                                                  |
| Asn(GTT)  | 44              | LjSGA_000580.1.1,LjSGA_000581.1.1,LjSGA_000582.0.1,LjSGA_000856.2.1,LjSGA_000857.0.1,LjSGA_001531.0.1,LjSGA_027174.0.1,LjSGA_029655.0.1,LjSGA_033233.0.1,LjSGA_034758.0.2,LjSGA_036837.0.1,LjSGA_062270.0.1,LjSGA_062817.0.1,LjSGA_063468.0.1,LjSGA_064786.1.1,LjSGA_066507.0.2,LjSGA_077679.0.1,LjSGA_079831.0.1,LjSGA_089458.0.2,LjSGA_090879.1.1,LjSGA_094328.0.1,LjSGA_095609.1.1,LjSGA_099551.1.1,LjSGA_100259.1.1,LjSGA_100273.0.1,LjSGA_102138.0.1,LjSGA_106623.1.1,LjSGA_107510.1.1,LjSGA_112580.0.2,LjSGA_119639.1.1,LjSGA_122659.0.1,LjSGA_125973.0.1,LjSGA_127506.1.1,LjSGA_129700.0.1,LjSGA_139720.1.2,chr1.CM0088.580.nd,chr2.CM0120.280.nc,chr2.CM0153.130.nc,chr3.CM0690.60.nd,chr3.LjT07H20.40.nd,chr5.CM0040.590.nd,chr5.CM0239.700.nc,chr5.CM0299.510.nd,chr6.LjT02P05.140.nd |
| Asp(ATC)  | 1               | LjSGA_118743.0.1                                                                                                                                                                                                                                                                                                                                                                                                                                                                                                                                                                                                                                                                                                                                                                                |
| Asp(GTC)  | 28              | LjB18I1.30.nd,LjSGA_000356.0.1,LjSGA_006063.2.2,LjSGA_011819.0.1,LjSGA_019714.0.1,LjSGA_024813.0.1,LjSGA_035242.0.1,LjSGA_058323.0.1,LjSGA_087375.0.1,LjSGA_096041.0.2,LjSGA_096992.0.1,LjSGA_132645.0.3,LjSGA_137751.0.1,LjSGA_142963.1.1,LjT10C06.100.nd,chr1.CM0122.740.nd,chr1.CM0122.770.nd,chr1.CM0133.610.nc,chr1.CM0375.40.nd,chr2.CM0008.690.nc,chr2.CM0058.440.nd,chr2.LjT44L24.260.nd,chr3.CM0253.130.nc,chr3.CM0355.260.nc,chr3.LjT34H24.130.nd,chr3.LjT34H24.150.nd,chr3.LjT40N08.210.nd,chr4.CM0042.430.nd                                                                                                                                                                                                                                                                        |
| Cys(GCA)  | 26              | LjSGA_000579.0.1,LjSGA_059390.0.1,LjSGA_067096.0.1,LjSGA_067096.0.2,LjSGA_087356.0.1,LjSGA_098615.0.1,LjSGA_101868.0.1,LjSGA_102130.0.1,LjSGA_105530.0.1,LjSGA_105544.0.1,LjSGA_105812.0.1,LjSGA_106677.0.1,LjSGA_113301.0.1,LjSGA_113954.0.1,LjSGA_116334.0.1,LjSGA_130586.0.1,LjSGA_146927.0.1,LjSGA_148219.0.1,LjT04A22.100.nc,LjT31F12.130.nd,LjT41B11.70.nd,chr1.CM0105.520.nc,chr3.CM0208.190.nc,chr4.CM0025.570.nd,chr4.CM0558.220.nc,chr5.CM0180.80.nc                                                                                                                                                                                                                                                                                                                                  |
| Gln(CTG)  | 6               | LjSGA_022963.0.1,LjT45C19.60.nd,chr1.LjT43L07.110.nd,chr2.CM0249.1360.nc,chr3.CM0091.730.nd,chr3.CM0164.180.nd                                                                                                                                                                                                                                                                                                                                                                                                                                                                                                                                                                                                                                                                                  |
| Gln(TTG)  | 10              | LjSGA_000363.0.1,LjSGA_022855.0.1,LjSGA_048513.0.1,LjSGA_051155.0.1,LjSGA_064248.0.1,LjSGA_091737.0.1,LjSGA_096924.0.1,LjSGA_112714.0.1,LjSGA_135261.0.1,LjT10J09.50.nd                                                                                                                                                                                                                                                                                                                                                                                                                                                                                                                                                                                                                         |
| Glu(CTC)  | 17              | CM0584.320.nd,LjSGA_020155.0.1,LjSGA_020970.1.1,LjSGA_026679.0.2,LjSGA_067537.0.1,LjSGA_074662.0.1,LjT27E22.140.nd,chr1.CM0105.240.nd,chr1.CM0231.120.nd,chr2.CM0021.1260.nd,chr2.CM0081.200.nc,chr3.CM0112.60.nc,chr3.CM0282.200.nd,chr3.CM0634.350.nd,chr4.CM0046.90.nd,chr4.CM0399.310.nd,chr5.CM0071.380.nd                                                                                                                                                                                                                                                                                                                                                                                                                                                                                 |
| Glu(TTC)  | 20              | LjSGA_022264.0.1,LjSGA_025542.1.2,LjSGA_031613.0.1,LjSGA_047288.0.1,LjSGA_079855.0.2,LjSGA_084909.0.1,LjSGA_093934.0.1,LjSGA_094806.1.1,LjSGA_096041.0.5,LjSGA_096996.0.3,LjSGA_097414.0.1,LjSGA_106085.0.2,LjSGA_134613.0.2,LjSGA_141655.0.3,chr1.CM0150.630.nd,chr2.CM0695.180.nc,chr4.CM0165.530.nd,chr5.CM0299.300.nc,chr6.CM0057.210.nc,chr6.CM0057.270.nd                                                                                                                                                                                                                                                                                                                                                                                                                                 |
| Gly(CCC)  | 6               | LjSGA_010960.1.1,LjSGA_039414.1.1,LjSGA_052328.0.1,LjSGA_145128.0.1,LjT32E09.120.nd,chr2.CM0124.450.nc                                                                                                                                                                                                                                                                                                                                                                                                                                                                                                                                                                                                                                                                                          |
| Gly(GCC)  | 19              | LjSGA_000010.0.1,LjSGA_000262.0.1,LjSGA_000263.0.1,LjSGA_004114.0.1,LjSGA_004115.0.1,LjSGA_011112.0.1,LjSGA_053847.0.1,LjSGA_137274.0.2,LjT30N24.150.nd,LjT39P23.130.nd,chr1.CM0593.270.nc,chr2.CM0249.390.nd,chr2.CM0545.680.nc,chr2.CM0788.140.nc,chr3.CM0160.370.nc,chr3.CM0282.400.nc,chr3.CM0634.250.nd,chr5.CM0909.870.nc,chr5.CM0956.90.nc                                                                                                                                                                                                                                                                                                                                                                                                                                               |
| Gly(TCC)  | 11              | LjSGA_009853.1.1,LjSGA_011860.0.2,LjSGA_022461.0.2,LjSGA_053446.0.1,LjSGA_081371.0.1,LjSGA_082919.0.1,LjSGA_090583.0.1,LjSGA_118011.0.1,chr2.CM0191.50.nc,chr3.LjT42M03.20.nd,chr4.CM0046.330.nd                                                                                                                                                                                                                                                                                                                                                                                                                                                                                                                                                                                                |
| His(GTG)  | 18              | LjB06H14.40.nc,LjSGA_000359.0.1,LjSGA_000360.0.1,LjSGA_030018.0.1,LjSGA_031628.1.1,LjSGA_039555.0.1,LjSGA_112596.1.1,LjSGA_125143.1.1,LjSGA_137513.1.1,chr2.CM0124.780.nc,chr2.CM1731.120.nc,chr4.CM0126.1610.nc,chr4.CM0131.550.nc,chr4.CM0429.190.nc,chr6.CM0055.1120.nd,chr6.CM0055.940.nc,chr6.CM0066.280.nc,chr6.CM0539.150.nd                                                                                                                                                                                                                                                                                                                                                                                                                                                             |
| Ile(AAT)  | 16              | LjSGA_009760.1.1,LjSGA_015360.0.1,LjSGA_029490.0.1,LjSGA_043921.0.1,LjSGA_055163.0.1,LjSGA_060360.0.1,LjSGA_088256.0.1,LjSGA_146451.0.2,LjT37I20.10.nc,chr1.CM0206.310.nc,chr2.CM0304.720.nc,chr2.CM0338.130.nc,chr2.CM0695.390.nd,chr3.CM0091.170.nc,chr4.CM0046.290.nd,chr6.CM0118.1030.nd                                                                                                                                                                                                                                                                                                                                                                                                                                                                                                    |
| Ile(TAT)  | 8               | CM1489.230.nc,LjSGA_039056.0.1,LjSGA_052416.0.1,LjSGA_065592.0.1,LjSGA_145049.0.1,LjSGA_145716.0.1,chr1.CM0206.690.nd,chr2.CM0249.1380.nc                                                                                                                                                                                                                                                                                                                                                                                                                                                                                                                                                                                                                                                       |
| Leu(AAG)  | 11              | LjSGA_012029.0.1,LjSGA_045260.0.1,LjSGA_046608.0.1,LjSGA_106296.0.1,LjSGA_108559.0.1,LjSGA_144261.0.1,LjSGA_146211.0.1,LjT01K02.70.nc,chr1.CM0032.490.nc,chr3.CM0396.40.nc,chr4.CM0244.700.nd                                                                                                                                                                                                                                                                                                                                                                                                                                                                                                                                                                                                   |
| Leu(CAA)  | 23              | LjSGA_040096.1.2,LjSGA_054896.1.1,LjSGA_058143.0.2,LjSGA_061891.1.1,LjSGA_063461.0.1,LjSGA_067953.0.1,LjSGA_073228.0.2,LjSGA_074276.1.1,LjSGA_080766.1.2,LjSGA_087372.0.1,LjSGA_088278.0.1,LjSGA_092461.1.2,LjSGA_093118.1.1,LjSGA_096917.1.1,LjSGA_099243.0.1,LjSGA_124861.0.2,LjT03D05.170.nd,LjT03D14.230.nd,LjT15B14.170.nd,chr2.CM0031.220.nc,chr3.CM0155.160.nd,chr3.CM0216.1000.nd,chr4.CM0007.740.nd                                                                                                                                                                                                                                                                                                                                                                                    |
| Leu(CAG)  | 5               | LjSGA_013886.0.1,LjSGA_048985.0.1,LjSGA_066544.0.1,LjSGA_071668.0.1,chr4.CM0288.530.nc                                                                                                                                                                                                                                                                                                                                                                                                                                                                                                                                                                                                                                                                                                          |

Supplemental Table 5.

|          |    |                                                                                                                                                                                                                                                                                                                                                                                                                                                                                                                                                                                                                                                                                                                                                                                           |
|----------|----|-------------------------------------------------------------------------------------------------------------------------------------------------------------------------------------------------------------------------------------------------------------------------------------------------------------------------------------------------------------------------------------------------------------------------------------------------------------------------------------------------------------------------------------------------------------------------------------------------------------------------------------------------------------------------------------------------------------------------------------------------------------------------------------------|
| Leu(TAA) | 11 | CM0466.60.nd,LjB15A13.110.nd,LjSGA_027060.0.1,LjSGA_039051.0.1,LjSGA_042995.0.1,LjSGA_054971.0.1,LjSGA_117094.0.1,chr1.CM0233.540.nc,chr1.CM0233.570.nc,chr3.CM0396.100.nc,chr6.CM0539.360.nd                                                                                                                                                                                                                                                                                                                                                                                                                                                                                                                                                                                             |
| Leu(TAG) | 16 | LjSGA_004021.1.1,LjSGA_026149.0.1,LjSGA_056035.1.1,LjSGA_082599.0.2,LjSGA_087331.0.1,LjSGA_091078.0.1,LjSGA_098766.0.1,LjSGA_105817.0.1,LjSGA_110434.0.2,LjSGA_113687.1.2,LjSGA_117593.1.2,LjSGA_131846.0.1,LjT15N18.260.nd,chr1.CM0361.70.nd,chr1.CM0668.200.nd,chr5.CM0956.140.nc                                                                                                                                                                                                                                                                                                                                                                                                                                                                                                       |
| Lys(CTT) | 17 | LjSGA_012238.0.1,LjSGA_015731.0.1,LjSGA_016083.0.1,LjSGA_022597.1.1,LjSGA_050142.0.1,LjSGA_092561.0.1,LjSGA_108228.0.1,LjSGA_149378.0.1,LjT25G12.120.nc,LjT30N04.50.nd,chr1.CM0001.100.nd,chr1.CM1255.260.nc,chr2.CM0021.800.nc,chr2.CM0304.120.nd,chr3.CM0396.220.nc,chr4.CM0075.240.nd,chr4.CM0831.110.nd                                                                                                                                                                                                                                                                                                                                                                                                                                                                               |
| Lys(TTT) | 12 | LjSGA_000268.0.2,LjSGA_009653.0.1,LjSGA_115635.0.1,LjT04M14.20.nd,chr1.CM0375.460.nc,chr1.CM0800.410.nd,chr1.LjT29L18.130.nd,chr1.LjT46N10.150.nd,chr2.CM0074.70.nc,chr2.CM0405.90.nd,chr3.CM0164.110.nd,chr3.CM0164.150.nd                                                                                                                                                                                                                                                                                                                                                                                                                                                                                                                                                               |
| Met(CAT) | 44 | LjB08M07.20.nc,LjB12O06.70.nc,LjB15P09.130.nc,LjSGA_000215.0.1,LjSGA_000216.0.1,LjSGA_007732.0.1,LjSGA_007733.0.1,LjSGA_026513.0.1,LjSGA_031613.0.3,LjSGA_036925.0.1,LjSGA_039722.0.1,LjSGA_043939.0.1,LjSGA_048983.0.1,LjSGA_066558.1.1,LjSGA_070365.0.1,LjSGA_074815.1.2,LjSGA_083295.0.1,LjSGA_085476.0.2,LjSGA_088277.0.1,LjSGA_089547.0.1,LjSGA_091178.0.2,LjSGA_100702.0.1,LjSGA_105545.0.1,LjSGA_113221.0.1,LjSGA_114936.0.2,LjSGA_116228.1.1,LjSGA_117580.0.1,LjSGA_122818.1.2,LjSGA_125730.0.1,LjSGA_137274.0.1,LjSGA_147240.0.1,LjSGA_148875.0.1,LjT04N09.90.nd,LjT15D16.40.nc,chr1.CM0295.880.nc,chr2.CM0020.290.nc,chr2.CM0056.370.nd,chr2.CM0177.800.nc,chr4.CM0046.410.nc,chr4.CM0126.1520.nc,chr4.CM0126.1640.nc,chr4.CM0128.70.nc,chr6.CM0836.520.nd,chr6.LjT41B02.100.nd |
| Phe(GAA) | 20 | LjB15P09.110.nc,LjSGA_001054.1.2,LjSGA_001055.0.1,LjSGA_009322.1.1,LjSGA_013124.2.1,LjSGA_048490.0.1,LjSGA_093263.0.1,LjSGA_099318.0.1,LjSGA_120327.0.1,LjSGA_128613.0.1,LjSGA_144678.0.1,LjT01P07.150.nd,LjT30N04.20.nd,chr3.CM0160.380.nc,chr3.CM0590.760.nc,chr4.CM0007.640.nd,chr4.CM0007.650.nd,chr4.CM0026.150.nd,chr4.CM0126.1480.nc,chr5.CM0158.150.nc                                                                                                                                                                                                                                                                                                                                                                                                                            |
| Pro(AGG) | 11 | LjB15A13.90.nd,LjSGA_013630.0.1,LjSGA_036107.1.1,LjSGA_052886.1.1,LjSGA_079009.0.1,chr4.CM0007.1020.nc,chr5.CM0200.310.nc,chr5.CM0200.330.nc,chr5.CM0200.350.nc,chr5.CM0200.360.nc,chr5.CM0311.30.nd                                                                                                                                                                                                                                                                                                                                                                                                                                                                                                                                                                                      |
| Pro(CGG) | 3  | CM0300.170.nd,chr1.CM0206.110.nd,chr3.CM0216.650.nc                                                                                                                                                                                                                                                                                                                                                                                                                                                                                                                                                                                                                                                                                                                                       |
| Pro(TGG) | 24 | CM0385.250.nd,LjSGA_001055.0.3,LjSGA_071951.0.3,LjSGA_073258.2.1,LjSGA_088474.0.1,LjSGA_089360.0.2,LjSGA_090124.0.2,LjSGA_122660.0.1,LjSGA_132441.0.1,LjSGA_133154.0.1,LjSGA_147069.0.1,LjT32D02.110.nc,chr4.CM0739.220.nd,chr4.LjT32J05.190.nc,chr5.CM0096.680.nd,chr5.CM0200.240.nc,chr5.CM0200.250.nc,chr5.CM0200.260.nc,chr5.CM0200.270.nc,chr5.CM0200.280.nc,chr5.CM0200.290.nc,chr5.CM0200.320.nc,chr5.CM0200.340.nc,chr5.CM0200.370.nc                                                                                                                                                                                                                                                                                                                                             |
| Ser(AGA) | 6  | LjSGA_020405.1.1,LjSGA_020643.0.1,LjSGA_059744.0.1,LjSGA_123704.0.1,chr1.CM0094.390.nc,chr3.CM0253.190.nc                                                                                                                                                                                                                                                                                                                                                                                                                                                                                                                                                                                                                                                                                 |
| Ser(CGA) | 2  | LjSGA_117851.0.1,chr3.CM0152.210.nc                                                                                                                                                                                                                                                                                                                                                                                                                                                                                                                                                                                                                                                                                                                                                       |
| Ser(GCT) | 12 | LjSGA_001052.0.1,LjSGA_001053.0.1,LjSGA_001054.0.1,LjSGA_030084.0.1,LjSGA_102143.0.1,LjSGA_103862.0.2,LjSGA_103963.0.1,LjSGA_113972.0.1,LjT38P01.220.nd,chr1.LjT05B18.210.nd,chr3.CM0106.200.nc,chr3.CM0396.190.nc                                                                                                                                                                                                                                                                                                                                                                                                                                                                                                                                                                        |
| Ser(GGA) | 9  | LjSGA_039703.0.2,LjSGA_043991.0.1,LjSGA_044596.0.2,LjSGA_048988.0.2,LjSGA_050867.1.1,LjSGA_056478.0.2,LjSGA_100446.1.1,LjSGA_112914.0.2,LjSGA_135849.0.2                                                                                                                                                                                                                                                                                                                                                                                                                                                                                                                                                                                                                                  |
| Ser(TGA) | 8  | LjSGA_034895.0.1,LjSGA_037552.1.2,LjSGA_055949.1.1,LjT28I10.10.nd,chr1.CM0544.290.nc,chr2.CM0021.30.nd,chr3.CM0091.460.nd,chr5.CM0211.100.nc                                                                                                                                                                                                                                                                                                                                                                                                                                                                                                                                                                                                                                              |
| Thr(AGT) | 6  | LjSGA_088932.0.1,chr1.CM0361.750.nc,chr2.CM0018.980.nc,chr2.CM0749.160.nd,chr5.CM0096.580.nd,chr6.LjT16B20.100.nc                                                                                                                                                                                                                                                                                                                                                                                                                                                                                                                                                                                                                                                                         |
| Thr(CGT) | 3  | LjSGA_082982.0.1,chr2.CM0373.610.nc,chr4.CM0500.340.nd                                                                                                                                                                                                                                                                                                                                                                                                                                                                                                                                                                                                                                                                                                                                    |
| Thr(GGT) | 8  | LjSGA_077259.0.1,LjSGA_079855.0.1,LjSGA_090887.0.1,LjSGA_106085.0.1,LjSGA_106854.0.1,LjSGA_129947.0.1,LjSGA_134613.0.1,LjSGA_141487.0.1                                                                                                                                                                                                                                                                                                                                                                                                                                                                                                                                                                                                                                                   |
| Thr(TGT) | 19 | LjB15P09.100.nc,LjSGA_009212.0.1,LjSGA_012727.0.1,LjSGA_038955.0.1,LjSGA_045892.0.1,LjSGA_046739.0.1,LjSGA_104100.0.1,LjSGA_113651.0.2,LjSGA_127963.0.1,LjSGA_135427.0.1,LjT10A2.1.70.nd,chr1.CM0166.120.nc,chr2.CM0304.1030.nc,chr3.CM0106.240.nc,chr4.CM0079.340.nd,chr4.CM0126.1470.nc,chr4.CM0501.20.nd,chr6.CM0539.140.nd,chr6.CM1829.30.nc                                                                                                                                                                                                                                                                                                                                                                                                                                          |
| Trp(CCA) | 20 | LjSGA_015436.0.1,LjSGA_028747.0.1,LjSGA_033058.0.1,LjSGA_038071.0.2,LjSGA_044437.0.1,LjSGA_055001.0.1,LjSGA_071951.0.2,LjSGA_088474.0.2,LjSGA_089360.0.1,LjSGA_090124.0.1,LjSGA_096806.0.1,LjSGA_121270.0.1,LjSGA_122394.0.1,LjSGA_129403.0.1,LjSGA_132441.0.2,LjT46I09.30.nd,chr3.CM0226.60.nd,chr4.CM0100.260.nd,chr4.CM1334.180.nc,chr6.CM0139.750.nd                                                                                                                                                                                                                                                                                                                                                                                                                                  |
| Tyr(GTA) | 24 | LjSGA_000581.1.2,LjSGA_000582.0.2,LjSGA_018216.1.1,LjSGA_021859.0.1,LjSGA_036925.0.2,LjSGA_041959.0.1,LjSGA_042153.0.1,LjSGA_055655.0.1,LjSGA_063963.0.1,LjSGA_075457.0.1,LjSGA_079855.0.3,LjSGA_096041.0.4,LjSGA_096996.0.2,LjSGA_097246.0.1,LjSGA_097414.0.2,LjSGA_104166.0.1,LjSGA_108939.0.1,LjSGA_132645.0.1,LjSGA_141655.0.2,LjT30N04.230.nd,LjT45I18.110.nd,chr1.CM0105.730.nc,chr3.CM0152.190.nc,chr6.LjT02P05.90.nd                                                                                                                                                                                                                                                                                                                                                              |
| Val(AAC) | 11 | CM0458.130.nd,LjSGA_005135.0.1,LjSGA_030967.0.1,chr1.CM0105.110.nd,chr1.CM0318.390.nc,chr1.CM0378.30.nc,chr2.CM0021.870.nd,chr2.CM0304.740.nc,chr2.CM1150.140.nd,chr3.LjT05P05.110.nd,chr3.LjT39G24.220.nd                                                                                                                                                                                                                                                                                                                                                                                                                                                                                                                                                                                |
| Val(CAC) | 4  | LjSGA_021944.0.1,LjSGA_028647.0.1,chr1.CM0147.980.nc,chr4.CM0558.130.nd                                                                                                                                                                                                                                                                                                                                                                                                                                                                                                                                                                                                                                                                                                                   |
| Val(GAC) | 6  | LjSGA_035805.0.1,LjSGA_038943.0.1,LjSGA_056059.0.1,LjSGA_096800.0.1,LjSGA_118999.0.1,LjSGA_148702.0.1                                                                                                                                                                                                                                                                                                                                                                                                                                                                                                                                                                                                                                                                                     |
| Val(TAC) | 4  | chr3.CM0070.350.nc,chr3.CM0160.120.nc,chr3.LjT34H24.40.nd,chr6.LjT04E21.170.nc                                                                                                                                                                                                                                                                                                                                                                                                                                                                                                                                                                                                                                                                                                            |

**Supplemental Table 6.** List of miRNA precursor-encoding genes and the putative targets.

| Genome/EST   | Sequence (5'→3')       | Length | Conserved Arabidopsis miRNA | Putative target      | Annotation                             |
|--------------|------------------------|--------|-----------------------------|----------------------|----------------------------------------|
| SPD025h11_f  | UGACAGAAGAGAGUGAGCAC   | 20     | ath-miR156a/b/c/d/e/f       | LjT31M07.90.nd       | Squamosa promoter binding like-protein |
| LjSGA_046440 | UGCCUGGCUCUCCUGUAUGCCA | 21     | ath-miR160a/b/c             | chr3.LjT10E18.60.nc  | putative auxin response factor 10      |
| LjT02P05     | UGCCUGGCUCUCCUGUAUGCCA | 21     | ath-miR160a/b/c             |                      |                                        |
| LjT38I13     | UGGAGAAGCAGGGCACGUGCA  | 21     | ath-miR164a/b               | LjSGA_137192.1       | NAM (no apical meristem)-like protein  |
| LjT29L06     | UGGAGAAGCAGGGCACGUGCA  | 21     | ath-miR164a/b               | chr4.CM0087.800.nd   | NAM (no apical meristem)-like protein  |
| LjSGA_043888 | UGGAGAAGCAGGGCACGUGCA  | 21     | ath-miR164a/b               |                      |                                        |
| LjSGA_008866 | UGGAGAAGCAGGGCACGUGCA  | 21     | ath-miR164a/b               |                      |                                        |
| CM0299       | UGGAGAAGCAGGGCACGUGCA  | 21     | ath-miR164a/b               |                      |                                        |
| CM0955       | UCGGACCAGGCUUCAUUCUCC  | 21     | ath-miR166a/b/c/d/e/f       | LjSGA_101583.1       | HD-zip transcription factor            |
| CM0591       | UCGGACCAGGCUUCAUUCUCC  | 21     | ath-miR166a/b/c/d/e/f       | LjSGA_035832.1       | HD-zip transcription factor            |
| LjSGA_018333 | UCGGACCAGGCUUCAUUCUCC  | 21     | ath-miR166a/b/c/d/e/f       | LjSGA_016228.1       | HD-zip transcription factor            |
| CM0375       | UCGGACCAGGUUCAUUCUCC   | 21     | ath-miR166a/b/c/d/e/f       | LjSGA_014333.2       | HD-zip transcription factor            |
| LjSGA_020966 | UCGGACCAGGCUUCAUUCUCC  | 21     | ath-miR166a/b/c/d/e/f       | LjSGA_029320.1       | HD-zip transcription factor            |
|              |                        |        |                             | LjSGA_086292.1       | HD-zip transcription factor            |
|              |                        |        |                             | chr3.LjT10E18.20.nc  | HD-zip transcription factor            |
| CM0322       | UGAAGCUGCCAGCAUGAUCUA  | 21     | ath-miR167a/b               | chr2.LjT43I20.180.nd | auxin response factor                  |
| CM0803       | UCGCUUGGUGCAGGUCGGAA   | 21     | ath-miR168a/b               | MPDL007e07_f         | Argonaute protein                      |
| LjT12G06     | CAGCCAAGGAUGACUUGCCGG  | 21     | ath-miR169b/c               | chr3.CM0724.30.nd    | transcription factor                   |
| LjSGA_058357 | AAGCCAAGGAUGACUUGCCGG  | 21     | ath-miR169b/c               |                      |                                        |
| LjSGA_017129 | CAGCCAAGGAUGACUUGCCGG  | 21     | ath-miR169b/c               |                      |                                        |
| LjSGA_014343 | CAGCCAAGGAUGACUUGCCGG  | 21     | ath-miR169b/c               |                      |                                        |
| LjSGA_043512 | CAGCCAAGGAUGACUUGCCGG  | 21     | ath-miR169b/c               |                      |                                        |
| LjT16A19     | UGAUUGAGCCGCGCCAAUAUC  | 21     | ath-miR171a                 | LjSGA_036968.1       | Scarecrow-like 6                       |
| LjSGA_041313 | UGAUUGAGCCGUGCCAAUAUC  | 21     | ath-miR171a                 |                      |                                        |
| CM0055       | UGAUUGAGCCGCGUCAAUAUC  | 21     | ath-miR171a                 |                      |                                        |
| LjSGA_017253 | UGAUUGAGCCGUGCCAAUAUC  | 21     | ath-miR171a                 |                      |                                        |
| LjSGA_147834 | UGAUUGAGCCGUGCCAAUAUC  | 21     | ath-miR171a                 |                      |                                        |
| LjSGA_087681 | UUGAGCCGUGCCAAUAUCACG  | 21     | ath-miR171b                 |                      |                                        |
| LjSGA_027480 | AGAAUCUUGAUGAUGCUGCAG  | 21     | ath-miR172c/d               | chr3.LjT05P05.30.nd  | AP2 domain transcription factor        |
| LjSGA_063209 | AGAAUCUUGAUGAUGCUGCAU  | 21     | ath-miR172a/b               |                      |                                        |
| LjSGA_146667 | AGAAUCUUGAUGAUGCUGCAU  | 21     | ath-miR172a/b               |                      |                                        |
| LjT44N20     | AGAAUCUUGAUGAUGCUGCAU  | 21     | ath-miR172a/b               |                      |                                        |
| LjSGA_025466 | UUGGACUGAAGGGAGCUCC    | 20     | ath-miR319a/b               | LjSGA_035803.1       | MYB family transcription factor        |
| LjSGA_062796 | UUGGACUGAAGGGAGCUCC    | 20     | ath-miR319c                 | chr3.CM0005.370.nc   | transcription factor GAMYB             |
| LjSGA_076794 | UUGGACUGAAGGGAGCUCC    | 20     | ath-miR319c                 |                      |                                        |
| CM0360       | UUGGACUGAAGGGAGCUCC    | 20     | ath-miR319c                 |                      |                                        |
| CM0116       | AAGCUCAGGAGGGAUAGCGCC  | 21     | ath-miR390a/b               |                      |                                        |
| LjT09A09     | AAGCUCAGGAGGGAUAGCGCC  | 21     | ath-miR390a/b               |                      |                                        |
| CM0148       | UCCAAAGGGAUCGCAUUGAUC  | 21     | ath-miR393a/b               | LjSGA_042978.1       | transport inhibitor response protein   |
| LjT13M01     | UCCAAAGGGAUCGCAUUGAUC  | 21     | ath-miR393a/b               | LjSGA_023031.1       | transport inhibitor response protein   |
| LjSGA_012464 | UUGGCAUUCUGUCCACCUC    | 20     | ath-miR394a/b               | LjSGA_028803.1       | F-box protein                          |
| LjSGA_010860 | AUGAAGUGUUUGGGGAACUC   | 21     | ath-miR395a/d/e             | chr6.LjT23A02.80.nc  | sulfate transporter                    |
| LjT04O21     | UUUCACAGCUUCAUGAACUG   | 21     | ath-miR396a                 |                      |                                        |
| CM0953       | UUCCACAGCUUUCUGAACUG   | 21     | ath-miR396a                 |                      |                                        |
| CM0003       | UUCCACAGCUUUCUGAACUG   | 21     | ath-miR396b                 |                      |                                        |
| LjSGA_002401 | UUAUUGAGUGCAGCGUUGAUG  | 21     | ath-miR397a                 | chr3.CM0792.230.nd   | laccase                                |
|              |                        |        |                             | LjSGA_075846.2       | laccase                                |
|              |                        |        |                             | chr2.CM0249.1200.nc  | laccase                                |
| CB829453     | UGUGUUCUCAGGUCACCCCUU  | 21     | ath-miR398a                 | LjSGA_088497.0.1     | Cytochrome c oxidase subunit Vb        |
| LjSGA_144108 | UGCCAAAGGAGAGUUGCCUUG  | 21     | ath-miR399b/c               | LjSGA_077849.1       | inorganic phosphate transporter        |
| CM0953       | UGCCAAAGGAGAGUUGCCUUG  | 21     | ath-miR399b/c               |                      |                                        |
| CM0126       | AGCCAAAGAAGAGUUGCCUUG  | 21     | ath-miR399b/c               |                      |                                        |
| CM0046       | UGCCAAAGGAGAUUUGCUCAG  | 21     | ath-miR399d                 |                      |                                        |
| CM0046       | CGCCAAAGAAGAUUUGCCCGG  | 21     | ath-miR399f                 |                      |                                        |
| CM0046       | UGCCAAAGGAGAUUUGCCUUG  | 21     | ath-miR399a                 |                      |                                        |
| LjSGA_142734 | AUGCACUGCCUUCUCCUGGC   | 21     | ath-miR408                  | LjSGA_034638.1       | basic blue copper protein              |
| CM0420       | AUGCACUGCCUUCUCCUGGC   | 21     | ath-miR408                  |                      |                                        |

**Supplemental Table 7.** Features of the deduced protein-encoding genes in the *L. japonicus* HGS.

| Features                           | <i>L. japonicus</i> | <i>A. thaliana</i> |
|------------------------------------|---------------------|--------------------|
| Gene length (bp) including introns | 39-24,972 (2,917)   | 78-17,203 (1,918)  |
| Product length (amino acids)       | 12-2,378 (433)      | 25-4,706 (427)     |
| Genes with introns                 | 3,968 (76%)         | 4,906 (76%)        |
| Number of intron/gene              | 0-48 (4.1)          | 0-48 (4.0)         |
| Coding exon length (bp)            | 2-5,262 (256)       | 2-5,966 (256)      |
| Intron length (bp)                 | 27-8,862 (395)      | 23-2,989 (157)     |
| GC content of exons                | 45%                 | 44%                |
| GC content of Introns              | 33%                 | 32%                |

**Supplemental Table 8.** Top 50 InterPro domains in the *L. japonicus* TGS.

| InterPro ID | InterPro definition                                  | Number of genes |
|-------------|------------------------------------------------------|-----------------|
| IPR011009   | Protein kinase-like                                  | 929             |
| IPR000719   | Protein kinase                                       | 906             |
| IPR002290   | Serine/threonine protein kinase                      | 581             |
| IPR008271   | Serine/threonine protein kinase, active site         | 469             |
| IPR002885   | Pentatricopeptide repeat                             | 433             |
| IPR001611   | Leucine-rich repeat                                  | 396             |
| IPR001810   | Cyclin-like F-box                                    | 375             |
| IPR009057   | Homeodomain-like                                     | 317             |
| IPR008940   | Protein prenyltransferase                            | 310             |
| IPR001245   | Tyrosine protein kinase                              | 304             |
| IPR001128   | Cytochrome P450                                      | 261             |
| IPR001841   | Zinc finger, RING-type                               | 260             |
| IPR000504   | RNA-binding region RNP-1 (RNA recognition motif)     | 226             |
| IPR001005   | Myb, DNA-binding                                     | 218             |
| IPR001680   | WD-40 repeat                                         | 204             |
| IPR011046   | WD40-like                                            | 170             |
| IPR012336   | Thioredoxin-like fold                                | 167             |
| IPR013210   | Leucine rich repeat, N-terminal                      | 160             |
| IPR012337   | Polynucleotidyl transferase, Ribonuclease H fold     | 154             |
| IPR002048   | Calcium-binding EF-hand                              | 150             |
| IPR001471   | Pathogenesis-related transcriptional factor and ERF  | 146             |
| IPR007087   | Zinc finger, C2H2-type                               | 140             |
| IPR002213   | UDP-glucuronosyl/UDP-glucosyltransferase             | 127             |
| IPR005123   | 2OG-Fe(II) oxygenase                                 | 121             |
| IPR002401   | Cytochrome P450, E-class, group I                    | 120             |
| IPR003591   | Leucine-rich repeat, typical subtype                 | 119             |
| IPR002182   | NB-ARC                                               | 117             |
| IPR003593   | AAA+ ATPase, core                                    | 117             |
| IPR000157   | Toll-Interleukin receptor                            | 115             |
| IPR001087   | Lipolytic enzyme, G-D-S-L                            | 115             |
| IPR003439   | ABC transporter related                              | 112             |
| IPR002016   | Haem peroxidase, plant/fungal/bacterial              | 110             |
| IPR008972   | Cupredoxin                                           | 110             |
| IPR010255   | Haem peroxidase                                      | 109             |
| IPR011043   | Galactose oxidase, central                           | 105             |
| IPR000767   | Disease resistance protein                           | 104             |
| IPR011598   | Helix-loop-helix DNA-binding                         | 103             |
| IPR011050   | Pectin lyase fold/virulence factor                   | 102             |
| IPR013830   | Esterase, SGNH hydrolase-type                        | 102             |
| IPR013026   | Tetratricopeptide region                             | 99              |
| IPR000823   | Plant peroxidase                                     | 98              |
| IPR007114   | Major facilitator superfamily                        | 98              |
| IPR006527   | F-box associated type 1                              | 97              |
| IPR009072   | Histone-fold                                         | 96              |
| IPR003441   | No apical meristem (NAM) protein                     | 95              |
| IPR001757   | ATPase, P-type, K/Mg/Cd/Cu/Zn/Na/Ca/Na/H-transporter | 92              |
| IPR001878   | Zinc finger, CCHC-type                               | 92              |
| IPR002110   | Ankyrin                                              | 92              |
| IPR001623   | Heat shock protein DnaJ, N-terminal                  | 91              |
| IPR013101   | Leucine-rich repeat 2                                | 91              |



**Supplemental Table 9.** List of transcription factor domains found in the *L. japonicus* and *A. thaliana* genomes.

|                          | <i>L. japonicus</i> | <i>A. thaliana</i> |
|--------------------------|---------------------|--------------------|
| C3H                      | 183                 | 164                |
| MYB                      | 156                 | 138                |
| AP2-EREBP                | 142                 | 128                |
| bHLH                     | 118                 | 162                |
| C2H2 (Zn)                | 107                 | 102                |
| MADS                     | 95                  | 110                |
| bZIP                     | 88                  | 73                 |
| ARF                      | 75                  | 24                 |
| NAC                      | 71                  | 90                 |
| WRKY (Zn)                | 63                  | 72                 |
| C2C2 (Zn)                | 53                  | 100                |
| HB                       | 41                  | 89                 |
| HSF                      | 37                  | 21                 |
| SBP                      | 33                  | 16                 |
| GRAS                     | 31                  | 33                 |
| G2-like                  | 23                  | 40                 |
| GARP                     | 20                  | 55                 |
| ABI3/VP1                 | 20                  | 20                 |
| CCAAT                    | 19                  | 35                 |
| TCP                      | 19                  | 26                 |
| TUB                      | 17                  | 10                 |
| CAMTA                    | 16                  | 6                  |
| CPP (Zn)                 | 9                   | 8                  |
| BPC                      | 8                   | 7                  |
| GRF/ENBP (C3H-type2; Zn) | 7                   | 9                  |
| EIL                      | 7                   | 6                  |
| E2F/DP                   | 7                   | 8                  |
| Alfin-like               | 5                   | 7                  |
| GeBP                     | 5                   | 16                 |
| BZR                      | 4                   | 6                  |
| VOZ-9                    | 2                   | 2                  |
| Total                    | 1481                | 1583               |

\*Data of *A. thaliana* TF was retrieved from AGRIS database at <http://arabidopsis.med.ohio-state.edu/>.

**Supplemental Table 10.** Cytochrome P450 genes in the genomes of *L. japonicus* and *A.thaliana*.

| CYP subfamily | <i>L. japonicus</i> | <i>A. thaliana</i> |
|---------------|---------------------|--------------------|
| CYP51G        | 1                   | 2                  |
| CYP71A        | 15                  | 17                 |
| CYP71B        | 37                  | 37                 |
| CYP72A        | 7                   | 9                  |
| CYP72C        | 2                   | 1                  |
| CYP73A        | 4                   | 1                  |
| CYP74A        | 5                   | 1                  |
| CYP74B        | 1                   | 1                  |
| CYP75B        | 8                   | 1                  |
| CYP76C        | 26                  | 8                  |
| CYP76G        | 2                   | 1                  |
| CYP77A        | 1                   | 6                  |
| CYP77B        | 1                   | 1                  |
| CYP78A        | 6                   | 6                  |
| CYP79A        | 6                   | 3                  |
| CYP79B        | 2                   | 3                  |
| CYP79C        | 0                   | 5                  |
| CYP79F        | 0                   | 2                  |
| CYP81D        | 6                   | 10                 |
| CYP81F        | 1                   | 4                  |
| CYP81G        | 0                   | 1                  |
| CYP81H        | 0                   | 1                  |
| CYP81K        | 0                   | 2                  |
| CYP82C        | 23                  | 3                  |
| CYP82F        | 0                   | 1                  |
| CYP82G        | 1                   | 1                  |
| CYP83A        | 0                   | 1                  |
| CYP83B        | 13                  | 1                  |
| CYP84A        | 5                   | 2                  |
| CYP85A        | 1                   | 2                  |
| CYP86A        | 4                   | 5                  |
| CYP86B        | 4                   | 2                  |
| CYP86C        | 0                   | 4                  |
| CYP87A        | 3                   | 2                  |
| CYP88A        | 9                   | 2                  |
| CYP89A        | 5                   | 7                  |
| CYP90A        | 1                   | 1                  |
| CYP90B        | 4                   | 1                  |
| CYP90C        | 3                   | 1                  |
| CYP90D        | 1                   | 1                  |
| CYP93C        | 10                  | 1                  |
| CYP94B        | 6                   | 3                  |
| CYP94C        | 2                   | 1                  |
| CYP94D        | 2                   | 3                  |
| CYP96A        | 8                   | 14                 |
| CYP97A        | 1                   | 1                  |
| CYP97B        | 1                   | 1                  |
| CYP97C        | 1                   | 1                  |
| CYP98A        | 1                   | 3                  |
| CYP701A       | 5                   | 1                  |
| CYP702A       | 0                   | 8                  |
| CYP703A       | 1                   | 1                  |
| CYP704A       | 5                   | 2                  |
| CYP704B       | 2                   | 1                  |
| CYP705A       | 1                   | 33                 |
| CYP706A       | 6                   | 7                  |
| CYP707A       | 9                   | 4                  |
| CYP708A       | 0                   | 4                  |
| CYP709B       | 1                   | 3                  |
| CYP710A       | 3                   | 4                  |
| CYP711A       | 2                   | 1                  |
| CYP712A       | 3                   | 2                  |
| CYP714A       | 3                   | 2                  |
| CYP715A       | 4                   | 1                  |
| CYP716A       | 12                  | 2                  |
| CYP718A       | 3                   | 1                  |
| CYP720A       | 0                   | 1                  |
| CYP721A       | 4                   | 1                  |
| CYP722A       | 4                   | 1                  |
| CYP724A       | 3                   | 1                  |
| CYP734A       | 1                   | 1                  |
| CYP735A       | 1                   | 2                  |
| total         | 313                 | 272                |

**Supplemental Table 11.** Disease resistance genes in the *L. japonicus* TGS.

| chr | map position | clone/contig name | non-TIR NBS-LRR type | TIR NBS-LRR type |
|-----|--------------|-------------------|----------------------|------------------|
| 1   | 0.0          | CM0174            |                      | 1                |
| 1   | 0.8          | LjT43O05          |                      | 1                |
| 1   | 2.8          | LjT27C19          |                      | 1                |
| 1   | 28.9         | CM0393            |                      | 1                |
| 1   | 29.7         | CM0141            |                      | 1                |
| 1   | 31.3         | LjT34H22          | 1                    |                  |
| 1   | 33.7         | LjB10L14          | 1                    |                  |
| 1   | 34.9         | LjT23O20          |                      | 2                |
| 1   | 35.3         | LjT36P09          |                      | 1                |
| 1   | 42.2         | CM0231            |                      | 1                |
| 1   | 44.2         | CM0147            |                      | 1                |
| 1   | 45.0         | CM0800            |                      | 1                |
| 1   | 47.5         | LjT16O03          |                      | 1                |
| 1   | 52.6         | CM0104            |                      | 2                |
| 1   | 56.6         | CM0098            | 1                    |                  |
| 2   | 6.0          | LjT16I15          | 1                    |                  |
| 2   | 8.4          | LjT37J22          |                      | 1                |
| 2   | 27.4         | LjT39I02          | 1                    |                  |
| 2   | 40.3         | CM0608            |                      | 3                |
| 2   | 40.7         | CM1150            | 2                    |                  |
| 2   | 42.3         | CM0056            |                      | 1                |
| 2   | 48.9         | CM0020            | 4                    |                  |
| 2   | 49.3         | CM0803            | 1                    |                  |
| 2   | 51.7         | CM0272            | 1                    |                  |
| 2   | 55.2         | CM0249            | 1                    |                  |
| 2   | 60.9         | CM0304            |                      | 1                |
| 2   | 63.3         | CM0346            |                      | 1                |
| 2   | 67.3         | LjT46G02          | 1                    |                  |
| 2   | 67.7         | CM0826            | 1                    |                  |
| 2   | 68.1         | CM0545            | 1                    |                  |
| 2   | 69.3         | LjT04L10          |                      | 2                |
| 2   | 69.5         | CM0099            |                      | 1                |
| 2   | 69.7         | LjT02C03          |                      | 6                |
| 2   | 70.5         | LjT42I05          |                      | 1                |
| 2   | 72.5         | CM0191            | 1                    |                  |
| 3   | 5.3          | CM0106            | 1                    |                  |
| 3   | 7.7          | CM0282            |                      | 1                |
| 3   | 12.9         | CM0590            |                      | 1                |
| 3   | 13.8         | CM0241            |                      | 5                |
| 3   | 31.6         | CM0116            |                      | 1                |
| 3   | 32.0         | TM0388            |                      | 1                |
| 3   | 32.0         | TM1548            |                      | 3                |
| 3   | 32.0         | TM0022            | 1                    |                  |
| 3   | 34.0         | CM0005            |                      | 1                |
| 3   | 34.0         | CM0690            | 1                    |                  |
| 3   | 34.0         | TM1367            | 1                    |                  |

Supplemental Table 11.

|                   |      |          |    |     |
|-------------------|------|----------|----|-----|
| 3                 | 36.8 | CM0047   |    | 1   |
| 3                 | 55.1 | CM0049   |    | 2   |
| 3                 | 74.8 | CM0091   |    | 1   |
| 3                 | 82.4 | CM0127   | 1  |     |
| 4                 | 8.4  | CM0007   | 1  |     |
| 4                 | 9.6  | CM0832   | 1  |     |
| 4                 | 34.7 | CM0179   |    | 1   |
| 4                 | 69.2 | CM0042   |    | 3   |
| 5                 | 0.0  | CM0089   | 2  |     |
| 5                 | 6.8  | CM0345   | 1  |     |
| 5                 | 12.4 | CM0571   | 2  |     |
| 6                 | 6.5  | LjT19B22 |    | 1   |
| 6                 | 27.6 | CM0057   |    | 1   |
| 6                 | 57.6 | LjT04E21 | 1  |     |
| 6                 | 61.5 | CM0055   | 2  |     |
| unmapped clones   |      | LjB12O06 |    | 2   |
|                   |      | CM0528   |    | 1   |
|                   |      | CM0693   |    | 1   |
|                   |      | LjT39P23 |    | 2   |
|                   |      | LjT41B20 |    | 2   |
|                   |      | CM0533   |    | 7   |
|                   |      | LjT37O09 |    | 3   |
|                   |      | LjT07P21 |    | 1   |
|                   |      | LjT47D03 |    | 4   |
|                   |      | LjT36L22 |    | 2   |
|                   |      | LjT21I18 |    | 1   |
|                   |      | LjT41B11 |    | 3   |
|                   |      | CM0809   | 1  |     |
|                   |      | LjT46F23 | 1  |     |
|                   |      | LjT15I01 | 1  |     |
|                   |      | LjT47H21 | 1  |     |
| LjSGA             |      |          | 18 | 91  |
| Total gene number |      |          | 55 | 174 |

**Supplemental Table12.** The most frequently observed InterPro domains in the genes that are conserved in legumes but not in other plant species.

| InterPro ID | InterPro difinition                                                       | Number of genes |
|-------------|---------------------------------------------------------------------------|-----------------|
| IPR001810   | Cyclin-like F-box                                                         | 61              |
| IPR013101   | Leucine-rich repeat 2                                                     | 26              |
| IPR000719   | Protein kinase                                                            | 22              |
| IPR011009   | Protein kinase-like                                                       | 22              |
| IPR006527   | F-box associated type 1                                                   | 16              |
| IPR001611   | Leucine-rich repeat                                                       | 14              |
| IPR000157   | Toll-Interleukin receptor                                                 | 13              |
| IPR003612   | Plant lipid transfer protein/seed storage/trypsin-alpha amylase inhibitor | 11              |
| IPR003871   | Protein of unknown function DUF223, Arabidopsis thaliana                  | 10              |
| IPR012337   | Polynucleotidyl transferase, Ribonuclease H fold                          | 10              |
| IPR010264   | Plant self-incompatibility S1                                             | 9               |
| IPR001841   | Zinc finger, RING-type                                                    | 8               |
| IPR002100   | Transcription factor, MADS-box                                            | 8               |
| IPR002885   | Pentatricopeptide repeat                                                  | 8               |
| IPR003340   | Transcriptional factor B3                                                 | 8               |
| IPR006121   | Heavy metal transport/detoxification protein                              | 8               |
| IPR001087   | Lipolytic enzyme, G-D-S-L                                                 | 7               |
| IPR001128   | Cytochrome P450                                                           | 7               |
| IPR001245   | Tyrosine protein kinase                                                   | 7               |
| IPR013210   | Leucine rich repeat, N-terminal                                           | 7               |
| IPR000215   | Proteinase inhibitor I4, serpin                                           | 6               |
| IPR001471   | Pathogenesis-related transcriptional factor and ERF                       | 6               |
| IPR004314   | Protein of unknown function DUF239, plant                                 | 6               |
| IPR013128   | Peptidase C1A, papain                                                     | 6               |
| IPR000668   | Peptidase C1A, papain C-terminal                                          | 5               |
| IPR001395   | Aldo/keto reductase                                                       | 5               |
| IPR001563   | Peptidase S10, serine carboxypeptidase                                    | 5               |
| IPR003480   | Transferase                                                               | 5               |
| IPR008949   | Terpenoid synthase                                                        | 5               |
| IPR008972   | Cupredoxin                                                                | 5               |
| IPR011043   | Galactose oxidase, central                                                | 5               |

**Supplemental Table13.** The most frequently observed InterPro domains in the *L. japonicus* genes that do not have a counterpart in the public DNA databases.

| InterPro ID | InterPro definition                                                       | Number of genes |
|-------------|---------------------------------------------------------------------------|-----------------|
| IPR000504   | RNA-binding region RNP-1 (RNA recognition motif)                          | 25              |
| IPR001810   | Cyclin-like F-box                                                         | 22              |
| IPR008994   | Nucleic acid-binding, OB-fold                                             | 15              |
| IPR006032   | Ribosomal protein S12/S23                                                 | 13              |
| IPR001878   | Zinc finger, CCHC-type                                                    | 11              |
| IPR000823   | Plant peroxidase                                                          | 8               |
| IPR002016   | Haem peroxidase, plant/fungal/bacterial                                   | 8               |
| IPR010255   | Haem peroxidase                                                           | 8               |
| IPR007087   | Zinc finger, C2H2-type                                                    | 7               |
| IPR003441   | No apical meristem (NAM) protein                                          | 6               |
| IPR009057   | Homeodomain-like                                                          | 6               |
| IPR010666   | Zinc finger, GRF-type                                                     | 6               |
| IPR003612   | Plant lipid transfer protein/seed storage/trypsin-alpha amylase inhibitor | 5               |
| IPR008972   | Cupredoxin                                                                | 5               |
| IPR010264   | Plant self-incompatibility S1                                             | 5               |
| IPR001005   | Myb, DNA-binding                                                          | 4               |
| IPR001128   | Cytochrome P450                                                           | 4               |
| IPR001841   | Zinc finger, RING-type                                                    | 4               |
| IPR003245   | Plastocyanin-like                                                         | 4               |
| IPR007243   | Autophagy protein Apg6                                                    | 4               |
| IPR011009   | Protein kinase-like                                                       | 4               |
| IPR013128   | Peptidase C1A, papain                                                     | 4               |
| IPR013201   | Proteinase inhibitor I29, cathepsin propeptide                            | 4               |

**Supplemental Table 14.** List of the genes conserved in legumes but not in other plant species.

| gene name           | product size (aa) | Description                                                                                  |
|---------------------|-------------------|----------------------------------------------------------------------------------------------|
| chr1.CM0017.390.nd  | 331               | (A2Q377) Nucleic acid-binding, OB-fold - Medicago truncatula (Barrel medic)                  |
| chr1.CM0032.150.nc  | 191               | (Q1SI42) F-box associated, putative - Medicago truncatula (Barrel medic)                     |
| chr1.CM0032.80.nd   | 138               | (Q1S6Z0) Ribonuclease T2 - Medicago truncatula (Barrel medic)                                |
| chr1.CM0033.1190.nc | 139               | (Q1SRN1) Integrase, catalytic region - Medicago truncatula (Barrel medic)                    |
| chr1.CM0098.50.nd   | 118               | (Q1SJS5) Zinc finger, RING-type; RINGv - Medicago truncatula (Barrel medic)                  |
| chr1.CM0101.180.nc  | 126               | (Q52ZP9) Suppressor of CONSTANS 1a (Fragment) - Pisum sativum (Garden pea)                   |
| chr1.CM0104.210.nc  | 506               | (Q2HRN3) Transcription factor, MADS-box - Medicago truncatula (Barrel medic)                 |
| chr1.CM0104.340.nd  | 116               | (A2Q5R3) Thioredoxin domain 2; Thioredoxin fold - Medicago truncatula (Barrel medic)         |
| chr1.CM0125.80.nc   | 396               | (Q1RWX3) Zinc finger, CCHC-type; Zinc finger, SWIM-type - Medicago truncatula (Barrel medic) |
| chr1.CM0145.70.nc   | 554               | (A2Q1D6) Ovarian tumour, otubain, related - Medicago truncatula (Barrel medic)               |
| chr1.CM0147.1070.nd | 183               | (A2Q1T1) Ubiquitin - Medicago truncatula (Barrel medic)                                      |
| chr1.CM0195.310.nc  | 335               | (Q1S216) Cyclin-like F-box; FBD - Medicago truncatula (Barrel medic)                         |

|                    |     |                                                                                                                               |
|--------------------|-----|-------------------------------------------------------------------------------------------------------------------------------|
| chr1.CM0206.750.nc | 382 | (Q1T2S5) Cyclin-like F-box; F-box protein interaction domain; Galactose oxidase, central - Medicago truncatula (Barrel medic) |
| chr1.CM0233.40.nc  | 175 | (Q1S5R2) At4g32860 - Medicago truncatula (Barrel medic)                                                                       |
| chr1.CM0233.420.nc | 666 | (A2Q377) Nucleic acid-binding, OB-fold - Medicago truncatula (Barrel medic)                                                   |
| chr1.CM0233.500.nc | 574 | (Q1RU36) Hypothetical protein - Medicago truncatula (Barrel medic)                                                            |
| chr1.CM0233.520.nc | 480 | (Q2HSZ7) Cyclin-like F-box; FAR1; Zinc finger, SWIM-type - Medicago truncatula (Barrel medic)                                 |
| chr1.CM0316.70.nd  | 369 | (Q1S216) Cyclin-like F-box; FBD - Medicago truncatula (Barrel medic)                                                          |
| chr1.CM0316.80.nd  | 375 | (Q1S216) Cyclin-like F-box; FBD - Medicago truncatula (Barrel medic)                                                          |
| chr1.CM0371.310.nc | 284 | (A2Q5N8) YT521-B-like protein - Medicago truncatula (Barrel medic)                                                            |
| chr1.CM0375.140.nd | 131 | (Q2HUN6) RNA-directed DNA polymerase (Reverse transcriptase); Ribonuclease H - Medicago truncatula (Barrel medic)             |
| chr1.CM0375.190.nd | 131 | (Q2HUN6) RNA-directed DNA polymerase (Reverse transcriptase); Ribonuclease H - Medicago truncatula (Barrel medic)             |
| chr1.CM0393.500.nd | 235 | (Q1SN43) Nucleic acid-binding, OB-fold, subgroup - Medicago truncatula (Barrel medic)                                         |
| chr1.CM0410.50.nc  | 68  | (Q1SCF3) AT5g39050/MXF12_60 - Medicago truncatula (Barrel medic)                                                              |
| chr1.CM0476.170.nc | 860 | (Q1S8L3) Hypothetical protein - Medicago truncatula (Barrel medic)                                                            |
| chr1.CM0496.60.nd  | 297 | (Q1SPF6) Hypothetical protein - Medicago truncatula (Barrel medic)                                                            |
| chr1.CM0544.310.nc | 79  | (A2Q5Z5) Hypothetical protein - Medicago truncatula (Barrel medic)                                                            |
| chr1.CM0544.350.nc | 200 | (A2Q5Z9) Hypothetical protein - Medicago truncatula (Barrel medic)                                                            |
| chr1.CM0600.120.nd | 111 | (Q0PJK0) MYB transcription factor MYB88 - Glycine max (Soybean)                                                               |
| chr1.CM0668.120.nd | 69  | (A2Q3S6) Terpene synthase-like; Terpenoid synthase (Fragment) - Medicago truncatula (Barrel medic)                            |



|                      |     |                                                                                                                                  |
|----------------------|-----|----------------------------------------------------------------------------------------------------------------------------------|
| chr1.CM0760.20.nc    | 88  | (Q1SYJ6) Hypothetical protein - Medicago truncatula (Barrel medic)                                                               |
| chr1.CM1956.490.nc   | 778 | (Q2HU05) Integrase, catalytic region; Zinc finger, CCHC-type; Peptidase aspartic, catalytic - Medicago truncatula (Barrel medic) |
| chr1.CM1956.700.nc   | 223 | (Q8RVA9) Succinate dehydrogenase subunit 4 - Pisum sativum (Garden pea)                                                          |
| chr1.LjT03I11.110.nd | 214 | (A2Q377) Nucleic acid-binding, OB-fold - Medicago truncatula (Barrel medic)                                                      |
| chr1.LjT03K08.120.nc | 188 | (Q1T0C2) Protein kinase - Medicago truncatula (Barrel medic)                                                                     |
| chr1.LjT06I08.100.nc | 72  | (Q1ST07) Hypothetical protein - Medicago truncatula (Barrel medic)                                                               |
| chr1.LjT23O20.120.nd | 428 | (Q8S4X3) TIR-similar-domain-containing protein TSDC - Pisum sativum (Garden pea)                                                 |
| chr1.LjT34H22.50.nd  | 185 | (Q69F86) Serine-threonine kinase - Phaseolus vulgaris (Kidney bean) (French bean)                                                |
| chr1.LjT35C22.120.nc | 193 | (Q2HSY3) Nucleic acid-binding, OB-fold, subgroup - Medicago truncatula (Barrel medic)                                            |
| chr1.LjT36F23.80.nd  | 182 | (Q1S668) Cyclin-like F-box; F-box protein interaction domain - Medicago truncatula (Barrel medic)                                |
| chr1.LjT44L17.50.nd  | 77  | (Q1SZE6) Hypothetical protein - Medicago truncatula (Barrel medic)                                                               |
| chr2.CM0018.1020.nc  | 300 | (Q1RTJ9) Cyclin-like F-box; F-box protein interaction domain - Medicago truncatula (Barrel medic)                                |
| chr2.CM0018.1030.nc  | 369 | (Q1S2E0) Cyclin-like F-box; F-box protein interaction domain; Galactose oxidase, central - Medicago truncatula (Barrel medic)    |
| chr2.CM0018.910.nc   | 399 | (A2Q377) Nucleic acid-binding, OB-fold - Medicago truncatula (Barrel medic)                                                      |
| chr2.CM0021.300.nc   | 439 | (Q1SCA5) Hypothetical protein - Medicago truncatula (Barrel medic)                                                               |

|                    |     |                                                                                                   |
|--------------------|-----|---------------------------------------------------------------------------------------------------|
| chr2.CM0021.470.nc | 379 | (Q1S161) F-box protein interaction domain - Medicago truncatula (Barrel medic)                    |
| chr2.CM0021.980.nd | 231 | (A2Q1D6) Ovarian tumour, otubain, related - Medicago truncatula (Barrel medic)                    |
| chr2.CM0058.310.nd | 333 | (Q1SH60) Disease resistance protein; AAA ATPase - Medicago truncatula (Barrel medic)              |
| chr2.CM0099.110.nc | 100 | (Q56NI2) MADS box protein M8 - Pisum sativum (Garden pea)                                         |
| chr2.CM0177.250.nc | 360 | (Q1SST4) Polynucleotidyl transferase, Ribonuclease H fold - Medicago truncatula (Barrel medic)    |
| chr2.CM0191.200.nc | 184 | (Q6KC90) FtsH-like protease - Pisum sativum (Garden pea)                                          |
| chr2.CM0191.430.nc | 87  | (A1IHM7) Polyketide reductase - Lotus japonicus                                                   |
| chr2.CM0201.520.nd | 242 | (O24088) MtN24 protein - Medicago truncatula (Barrel medic)                                       |
| chr2.CM0201.540.nd | 247 | (O24088) MtN24 protein - Medicago truncatula (Barrel medic)                                       |
| chr2.CM0272.440.nd | 380 | (Q2HS67) Cyclin-like F-box; F-box protein interaction domain - Medicago truncatula (Barrel medic) |
| chr2.CM0338.270.nd | 76  | (A2Q516) SAM (And some other nucleotide) binding motif - Medicago truncatula (Barrel medic)       |
| chr2.CM0545.190.nd | 224 | (A2Q1D6) Ovarian tumour, otubain, related - Medicago truncatula (Barrel medic)                    |
| chr2.CM0803.810.nd | 76  | (Q2MIY7) Cytochrome P450 monooxygenase CYP707A17 (Fragment) - Medicago truncatula (Barrel medic)  |
| chr2.CM0826.30.nc  | 343 | (Q1S223) Cyclin-like F-box; FBD - Medicago truncatula (Barrel medic)                              |
| chr2.CM0826.80.nc  | 342 | (Q1S223) Cyclin-like F-box; FBD - Medicago truncatula (Barrel medic)                              |
| chr2.CM1032.180.nc | 103 | (Q1RXM5) Hypoxia induced protein conserved region - Medicago truncatula (Barrel medic)            |

|                      |     |                                                                                                    |
|----------------------|-----|----------------------------------------------------------------------------------------------------|
| chr2.LjT02E02.130.nd | 128 | (Q1ACB4) Homogentisate phytyltransferase VTE2-1 - Glycine max (Soybean)                            |
| chr2.LjT03I05.130.nc | 102 | (O24101) MtN5 protein precursor - Medicago truncatula (Barrel medic)                               |
| chr2.LjT03I05.160.nc | 102 | (O24101) MtN5 protein precursor - Medicago truncatula (Barrel medic)                               |
| chr2.LjT03I05.170.nc | 102 | (O24101) MtN5 protein precursor - Medicago truncatula (Barrel medic)                               |
| chr2.LjT10F02.180.nd | 217 | (Q1SCZ2) Transcriptional factor B3 - Medicago truncatula (Barrel medic)                            |
| chr2.LjT37J22.210.nd | 240 | (Q1RUJ1) Leucine-rich repeat - Medicago truncatula (Barrel medic)                                  |
| chr3.CM0005.830.nd   | 341 | (Q1SQ19) F-box protein interaction domain - Medicago truncatula (Barrel medic)                     |
| chr3.CM0049.110.nd   | 199 | (Q1RW52) Cyclin-like F-box; F-box protein interaction domain - Medicago truncatula (Barrel medic)  |
| chr3.CM0059.220.nc   | 248 | (Q1SN43) Nucleic acid-binding, OB-fold, subgroup - Medicago truncatula (Barrel medic)              |
| chr3.CM0070.210.nc   | 608 | (Q1SJ05) Hypothetical protein - Medicago truncatula (Barrel medic)                                 |
| chr3.CM0080.140.nd   | 141 | (Q8LLR3) Ethylene-responsive element binding protein 1 - Glycine max (Soybean)                     |
| chr3.CM0091.420.nd   | 101 | (Q41126) Non-specific lipid transfer-like protein - Phaseolus vulgaris (Kidney bean) (French bean) |
| chr3.CM0091.540.nc   | 112 | (Q9FUP6) Suspensor-specific protein - Phaseolus coccineus (Scarlet runner bean)                    |
| chr3.CM0111.400.nd   | 67  | (Q0GPF4) BZIP transcription factor bZIP132 - Glycine max (Soybean)                                 |
| chr3.CM0111.80.nd    | 134 | (Q1RVI4) Fasciclin domain, putative - Medicago truncatula (Barrel medic)                           |
| chr3.CM0112.250.nd   | 133 | (Q84VH6) Gag-pol polyprotein - Glycine max (Soybean)                                               |

|                     |      |                                                                                                              |
|---------------------|------|--------------------------------------------------------------------------------------------------------------|
| chr3.CM0116.220.nc  | 212  | (Q1RY66) Hypothetical protein - Medicago truncatula (Barrel medic)                                           |
| chr3.CM0127.720.nc  | 255  | (Q1S8A0) Cyclin-like F-box; F-box protein interaction domain - Medicago truncatula (Barrel medic)            |
| chr3.CM0127.870.nc  | 507  | (Q2HRQ4) Transcription factor, MADS-box - Medicago truncatula (Barrel medic)                                 |
| chr3.CM0142.50.nd   | 200  | (Q1S6C8) VQ - Medicago truncatula (Barrel medic)                                                             |
| chr3.CM0155.350.nc  | 208  | (Q1SN43) Nucleic acid-binding, OB-fold, subgroup - Medicago truncatula (Barrel medic)                        |
| chr3.CM0160.770.nd  | 91   | (Q1RY21) Hypothetical protein - Medicago truncatula (Barrel medic)                                           |
| chr3.CM0196.260.nc  | 157  | (Q2HT06) Hypothetical protein - Medicago truncatula (Barrel medic)                                           |
| chr3.CM0208.110.nd  | 1333 | (Q1S7C5) Integrase, catalytic region - Medicago truncatula (Barrel medic)                                    |
| chr3.CM0213.110.nc  | 287  | (A2Q377) Nucleic acid-binding, OB-fold - Medicago truncatula (Barrel medic)                                  |
| chr3.CM0241.270.nc  | 163  | (Q1SYP3) Leucine Rich Repeat, putative - Medicago truncatula (Barrel medic)                                  |
| chr3.CM0246.50.nd   | 108  | (Q1S193) Alpha/beta hydrolase fold - Medicago truncatula (Barrel medic)                                      |
| chr3.CM0292.290.nd  | 51   | (Q84PE1) Multifunctional beta-amyrin synthase - Lotus japonicus                                              |
| chr3.CM0355.80.nc   | 609  | (Q1SJ05) Hypothetical protein - Medicago truncatula (Barrel medic)                                           |
| chr3.CM0396.600.nc  | 314  | (Q1S5X3) Cyclin-like F-box; FBD - Medicago truncatula (Barrel medic)                                         |
| chr3.CM0574.20.nc   | 258  | (Q1SMB9) Glucosyltransferase, putative - Medicago truncatula (Barrel medic)                                  |
| chr3.CM0711.260.nc  | 157  | (Q9SBR5) Putative wound-induced protein - Medicago varia (Alfalfa)                                           |
| chr3.CM0792.200.nd  | 125  | (Q2HS30) Hypothetical protein - Medicago truncatula (Barrel medic)                                           |
| chr3.CM1144.20.nc   | 250  | (Q1SHX0) Ribosomal protein S2; Oligopeptide transporter OPT superfamily - Medicago truncatula (Barrel medic) |
| chr3.LjT09M07.10.nd | 261  | (Q1SVR4) Hypothetical protein - Medicago truncatula (Barrel medic)                                           |

|                      |     |                                                                                                      |
|----------------------|-----|------------------------------------------------------------------------------------------------------|
| chr3.LjT11G09.20.nc  | 80  | (Q75NI3) Type 2 metallothionein - Phaseolus aureus (Mung bean) (Vigna radiata)                       |
| chr3.LjT34H24.140.nd | 79  | (Q2H VX2) Embryo-specific 3 - Medicago truncatula (Barrel medic)                                     |
| chr3.LjT39G24.230.nd | 237 | (Q1SE34) Cyclin-like F-box; tRNA-binding arm - Medicago truncatula (Barrel medic)                    |
| chr3.LjT42M03.80.nd  | 103 | (Q1SGX5) Peptidase S10, serine carboxypeptidase - Medicago truncatula (Barrel medic)                 |
| chr4.CM0004.230.nd   | 78  | (Q1SEA5) Hypothetical protein - Medicago truncatula (Barrel medic)                                   |
| chr4.CM0042.2200.nc  | 352 | (Q1SN01) Hypothetical protein - Medicago truncatula (Barrel medic)                                   |
| chr4.CM0046.760.nc   | 304 | (Q1SNE2) Expressed protein, putative - Medicago truncatula (Barrel medic)                            |
| chr4.CM0079.320.nc   | 192 | (Q1SZJ0) Cyclin-dependent kinase inhibitor - Medicago truncatula (Barrel medic)                      |
| chr4.CM0100.350.nd   | 231 | (Q1SFW1) Hypothetical protein - Medicago truncatula (Barrel medic)                                   |
| chr4.CM0126.1450.nc  | 160 | (Q1ST36) Agenet - Medicago truncatula (Barrel medic)                                                 |
| chr4.CM0126.650.nc   | 195 | (Q1SUD8) Zinc finger, CCHC-type; Zinc finger, SWIM-type - Medicago truncatula (Barrel medic)         |
| chr4.CM0165.330.nd   | 57  | (Q0GPG1) BZIP transcription factor bZIP117 - Glycine max (Soybean)                                   |
| chr4.CM0165.60.nd    | 193 | (A2Q354) Harpin-induced 1 - Medicago truncatula (Barrel medic)                                       |
| chr4.CM0170.110.nd   | 207 | (A2Q2Z7) Contains similarity to reverse transcriptase , related - Medicago truncatula (Barrel medic) |
| chr4.CM0234.180.nc   | 448 | (A2Q377) Nucleic acid-binding, OB-fold - Medicago truncatula (Barrel medic)                          |

|                      |     |                                                                                                                                                                     |
|----------------------|-----|---------------------------------------------------------------------------------------------------------------------------------------------------------------------|
| chr4.CM0333.140.nd   | 190 | (Q1SWC3) T6A9.7 protein-Arabidopsis thaliana - Medicago truncatula (Barrel medic)                                                                                   |
| chr4.CM0337.190.nd   | 94  | (Q9XHD6) Polygalacturonase inhibitor protein (Fragment) - Glycine max (Soybean)                                                                                     |
| chr4.CM0421.220.nd   | 251 | (Q1T1H3) Cadmium-transporting ATPase; ATPase, E1-E2 type - Medicago truncatula (Barrel medic)                                                                       |
| chr4.CM0558.40.nd    | 120 | (Q9SBR6) Enod93 protein - Medicago varia (Alfalfa)                                                                                                                  |
| chr4.CM1616.400.nc   | 88  | (Q5UB06) Wound-inducible putative chloroplast terpene synthase 3 - Medicago truncatula (Barrel medic)                                                               |
| chr4.LjT13D08.190.nd | 275 | (Q1T2M2) Protein kinase - Medicago truncatula (Barrel medic)                                                                                                        |
| chr4.LjT233I03.20.nd | 260 | (Q1SDV9) Hypothetical protein - Medicago truncatula (Barrel medic)                                                                                                  |
| chr5.CM0019.150.nd   | 164 | (Q1RV67) Glycoside hydrolase, family 32 - Medicago truncatula (Barrel medic)                                                                                        |
| chr5.CM0040.790.nc   | 92  | (Q1SCZ2) Transcriptional factor B3 - Medicago truncatula (Barrel medic)                                                                                             |
| chr5.CM0062.80.nd    | 61  | (A2Q5Q4) Glycoside hydrolase, family 17; X8 - Medicago truncatula (Barrel medic)                                                                                    |
| chr5.CM0072.390.nd   | 64  | (Q1SM56) Peptidase C19, ubiquitin carboxyl-terminal hydrolase 2; Ubiquitin carboxyl-terminal hydrolase, N-terminal region 1 - Medicago truncatula (Barrel medic)    |
| chr5.CM0089.1240.nd  | 122 | (Q6Y1E6) Cysteine protease 8 - Trifolium repens (Creeping white clover)                                                                                             |
| chr5.CM0095.160.nc   | 86  | (Q1T152) IMP dehydrogenase/GMP reductase (Disease resistance protein; GTP-binding signal recognition particle SRP54, G-domain) - Medicago truncatula (Barrel medic) |

|                      |     |                                                                                                                    |
|----------------------|-----|--------------------------------------------------------------------------------------------------------------------|
| chr5.CM0096.30.nc    | 72  | (Q2HRI3) Hypothetical protein - <i>Medicago truncatula</i> (Barrel medic)                                          |
| chr5.CM0148.230.nc   | 124 | (A2Q5P6) Protein phosphatase inhibitor - <i>Medicago truncatula</i> (Barrel medic)                                 |
| chr5.CM0158.40.nc    | 244 | (Q1SN43) Nucleic acid-binding, OB-fold, subgroup - <i>Medicago truncatula</i> (Barrel medic)                       |
| chr5.CM0239.110.nd   | 141 | (Q1RU09) Polynucleotidyl transferase, Ribonuclease H fold - <i>Medicago truncatula</i> (Barrel medic)              |
| chr5.CM0239.50.nd    | 138 | (Q1RU06) Polynucleotidyl transferase, Ribonuclease H fold - <i>Medicago truncatula</i> (Barrel medic)              |
| chr5.CM0239.90.nd    | 203 | (Q1RU09) Polynucleotidyl transferase, Ribonuclease H fold - <i>Medicago truncatula</i> (Barrel medic)              |
| chr5.CM0335.310.nd   | 233 | (Q41111) Dehydrin - <i>Phaseolus vulgaris</i> (Kidney bean) (French bean)                                          |
| chr5.CM0335.60.nc    | 248 | (Q2HSY3) Nucleic acid-binding, OB-fold, subgroup - <i>Medicago truncatula</i> (Barrel medic)                       |
| chr5.CM0357.700.nc   | 603 | (Q1RU36) Hypothetical protein - <i>Medicago truncatula</i> (Barrel medic)                                          |
| chr5.CM0569.110.nd   | 82  | (Q4VYC7) Coiled-coil-helix-coiled-coil-helix domain containing protein - <i>Medicago truncatula</i> (Barrel medic) |
| chr5.CM0909.420.nc   | 707 | (Q1SYZ2) Transposase - <i>Medicago truncatula</i> (Barrel medic)                                                   |
| chr5.CM0909.570.nc   | 287 | (Q1SDV9) Hypothetical protein - <i>Medicago truncatula</i> (Barrel medic)                                          |
| chr5.CM0911.110.nd   | 226 | (Q1S2W5) NB-ARC domain, putative - <i>Medicago truncatula</i> (Barrel medic)                                       |
| chr5.CM0953.370.nd   | 81  | (Q1S104) Embryo-specific 3 - <i>Medicago truncatula</i> (Barrel medic)                                             |
| chr5.CM1125.360.nc   | 276 | (Q1S7I4) Helix-loop-helix DNA-binding - <i>Medicago truncatula</i> (Barrel medic)                                  |
| chr5.CM1125.60.nc    | 145 | (Q1S0T4) Cyclin-like F-box - <i>Medicago truncatula</i> (Barrel medic)                                             |
| chr5.LjT10N02.230.nd | 79  | (Q9ZRY4) NDX1 homeobox protein - <i>Lotus japonicus</i>                                                            |

|                      |     |                                                                                                                                                  |
|----------------------|-----|--------------------------------------------------------------------------------------------------------------------------------------------------|
| chr5.LjT40M15.30.nc  | 138 | (Q1RW23) Plant self-incompatibility S1 - <i>Medicago truncatula</i> (Barrel medic)                                                               |
| chr5.LjT41L03.130.nd | 99  | (Q1T3I5) Hypothetical protein - <i>Medicago truncatula</i> (Barrel medic)                                                                        |
| chr6.CM0045.110.nc   | 257 | (Q1T444) At1g16840/F17F16.27-related - <i>Medicago truncatula</i> (Barrel medic)                                                                 |
| chr6.CM0066.460.nd   | 54  | (Q2HST1) Ferric reductase-like transmembrane component - <i>Medicago truncatula</i> (Barrel medic)                                               |
| chr6.CM0118.840.nc   | 350 | (Q1SS60) RNA-directed DNA polymerase (Reverse transcriptase); Zinc finger, CCHC-type; Ribonuclease H - <i>Medicago truncatula</i> (Barrel medic) |
| chr6.CM0139.20.nd    | 80  | (Q1W5W2) Adenylate isopentenyltransferase - <i>Lotus japonicus</i>                                                                               |
| chr6.CM0302.50.nc    | 305 | (A2Q5X7) Ovarian tumour, otubain, putative - <i>Medicago truncatula</i> (Barrel medic)                                                           |
| chr6.CM0314.200.nd   | 179 | (Q1T553) Reverse transcriptase (RNA-dependent DNA polymerase), putative - <i>Medicago truncatula</i> (Barrel medic)                              |
| chr6.CM0437.350.nc   | 304 | (Q1S4X6) Hypothetical protein - <i>Medicago truncatula</i> (Barrel medic)                                                                        |
| chr6.LjT02P05.40.nd  | 71  | (A2Q5G7) Heavy metal transport/detoxification protein - <i>Medicago truncatula</i> (Barrel medic)                                                |
| chr6.LjT19B22.130.nd | 115 | (Q9M7D7) Lipid transfer protein - <i>Pisum sativum</i> (Garden pea)                                                                              |
| chr6.LjT30N23.170.nd | 216 | (Q1RX94) IMP dehydrogenase/GMP reductase - <i>Medicago truncatula</i> (Barrel medic)                                                             |
| chr6.LjT34O10.30.nd  | 120 | (Q1SM53) Hypothetical protein - <i>Medicago truncatula</i> (Barrel medic)                                                                        |
| chr6.LjT36L14.120.nd | 121 | (A2Q3A4) Hypothetical protein - <i>Medicago truncatula</i> (Barrel medic)                                                                        |



|                      |     |                                                                                                                               |
|----------------------|-----|-------------------------------------------------------------------------------------------------------------------------------|
| chr6.LjT36L14.200.nd | 143 | (Q1SYX5) Protein kinase - Medicago truncatula (Barrel medic)                                                                  |
| chr6.LjT45M04.270.nd | 59  | (Q2MJ13) Cytochrome P450 monooxygenase CYP83E9 - Medicago truncatula (Barrel medic)                                           |
| CM0300.120.nd        | 326 | (Q1T2T1) Cyclin-like F-box; F-box protein interaction domain - Medicago truncatula (Barrel medic)                             |
| CM0300.190.nd        | 234 | (Q1SVM0) Cyclin-like F-box - Medicago truncatula (Barrel medic)                                                               |
| CM0385.320.nd        | 173 | (A2Q147) Exostosin-like - Medicago truncatula (Barrel medic)                                                                  |
| LjB14K02.80.nc       | 284 | (Q1SIK3) Cyclin-like F-box; F-box protein interaction domain; Galactose oxidase, central - Medicago truncatula (Barrel medic) |
| LjT01D09.130.nd      | 174 | (A2Q377) Nucleic acid-binding, OB-fold - Medicago truncatula (Barrel medic)                                                   |
| LjT01K02.120.nc      | 150 | (Q1SMY2) Alcohol dehydrogenase superfamily, zinc-containing - Medicago truncatula (Barrel medic)                              |
| LjT02J13.110.nc      | 133 | (Q1S1V9) Heavy metal transport/detoxification protein - Medicago truncatula (Barrel medic)                                    |
| LjT02N03.50.nd       | 125 | (Q1T3I5) Hypothetical protein - Medicago truncatula (Barrel medic)                                                            |
| LjT04D09.180.nd      | 84  | (Q9SEL1) Seed maturation protein PM23 (Fragment) - Glycine max (Soybean)                                                      |
| LjT06I09.10.nd       | 116 | (Q1SJ80) Cornichon - Medicago truncatula (Barrel medic)                                                                       |
| LjT07J01.30.nd       | 199 | (Q1SMB6) Cyclin-like F-box; F-box protein interaction domain - Medicago truncatula (Barrel medic)                             |
| LjT07J01.80.nd       | 189 | (Q1S6B6) Cyclin-like F-box; F-box protein interaction domain - Medicago truncatula (Barrel medic)                             |
| LjT07J23.20.nd       | 170 | (A2Q377) Nucleic acid-binding, OB-fold - Medicago truncatula (Barrel medic)                                                   |

|                 |     |                                                                                                             |
|-----------------|-----|-------------------------------------------------------------------------------------------------------------|
| LjT10C06.90.nd  | 339 | (Q1SHD0) Leucine Rich Repeat, putative - Medicago truncatula (Barrel medic)                                 |
| LjT11L09.170.nd | 92  | (Q00M65) Expressed protein-like protein - Glycine max (Soybean)                                             |
| LjT13A22.70.nc  | 136 | (Q2HSY3) Nucleic acid-binding, OB-fold, subgroup - Medicago truncatula (Barrel medic)                       |
| LjT13L04.100.nc | 327 | (Q1SAG6) Cyclin-like F-box; FBD - Medicago truncatula (Barrel medic)                                        |
| LjT13L04.50.nc  | 327 | (Q1SAG6) Cyclin-like F-box; FBD - Medicago truncatula (Barrel medic)                                        |
| LjT14E23.70.nc  | 259 | (Q1SCZ2) Transcriptional factor B3 - Medicago truncatula (Barrel medic)                                     |
| LjT15A10.50.nd  | 279 | (Q1SUI8) Beta tubulin - Medicago truncatula (Barrel medic)                                                  |
| LjT15F17.140.nd | 66  | (Q1RV67) Glycoside hydrolase, family 32 - Medicago truncatula (Barrel medic)                                |
| LjT16H12.130.nd | 96  | (Q1RSC2) Pentatricopeptide repeat - Medicago truncatula (Barrel medic)                                      |
| LjT16H12.280.nd | 121 | (Q1SWM3) Proteinase inhibitor, propeptide - Medicago truncatula (Barrel medic)                              |
| LjT17L12.190.nd | 153 | (Q1T3E8) Helix-turn-helix, AraC type; NAD-binding site; Fumarate lyase - Medicago truncatula (Barrel medic) |
| LjT18C07.90.nc  | 187 | (Q2PER6) Putative Asp1 - Trifolium pratense (Red clover)                                                    |
| LjT21I06.100.nd | 65  | (Q1RZG7) Hypothetical protein - Medicago truncatula (Barrel medic)                                          |
| LjT22N06.120.nd | 227 | (Q1S2G8) Cyclin-like F-box; FBD - Medicago truncatula (Barrel medic)                                        |
| LjT22N06.140.nd | 228 | (Q1S2G8) Cyclin-like F-box; FBD - Medicago truncatula (Barrel medic)                                        |
| LjT24M21.10.nd  | 348 | (Q1SMB6) Cyclin-like F-box; F-box protein interaction domain - Medicago truncatula (Barrel medic)           |
| LjT24M21.180.nd | 348 | (Q1SMB6) Cyclin-like F-box; F-box protein interaction domain - Medicago truncatula (Barrel medic)           |

|                    |     |                                                                                                                           |
|--------------------|-----|---------------------------------------------------------------------------------------------------------------------------|
| LjT24M21.190.nd    | 348 | (Q1SMB6) Cyclin-like F-box; F-box protein interaction domain - <i>Medicago truncatula</i> (Barrel medic)                  |
| LjT25G12.10.nc     | 113 | (Q4VPE7) Lateral organ boundaries-like 4 (Fragment) - <i>Lotus japonicus</i>                                              |
| LjT25I18.100.nc    | 395 | (Q1S8I3) RNA-directed DNA polymerase (Reverse transcriptase); Expansin/Lol pI - <i>Medicago truncatula</i> (Barrel medic) |
| LjT30J19.180.nd    | 308 | (A2Q377) Nucleic acid-binding, OB-fold - <i>Medicago truncatula</i> (Barrel medic)                                        |
| LjT30J19.30.nd     | 138 | (Q2HVD7) Nucleic acid-binding, OB-fold, subgroup - <i>Medicago truncatula</i> (Barrel medic)                              |
| LjT32M01.110.nd    | 197 | (Q2HV31) Prefoldin - <i>Medicago truncatula</i> (Barrel medic)                                                            |
| LjT39N06.110.nd    | 59  | (Q1T5H1) Multi antimicrobial extrusion protein MatE - <i>Medicago truncatula</i> (Barrel medic)                           |
| LjT41B11.140.nd    | 608 | (Q1SJ05) Hypothetical protein - <i>Medicago truncatula</i> (Barrel medic)                                                 |
| LjT44L11.30.nd     | 60  | (Q1T2K5) Alpha/beta hydrolase fold - <i>Medicago truncatula</i> (Barrel medic)                                            |
| LjT45C19.100.nd    | 144 | (Q1RW23) Plant self-incompatibility S1 - <i>Medicago truncatula</i> (Barrel medic)                                        |
| LjT46F13.30.nd     | 69  | (Q533S8) MADS box protein AP1a - <i>Lotus japonicus</i>                                                                   |
| LjT46I09.80.nd     | 193 | (Q1SBL6) Putative phytochrome kinase substrate 1, putative - <i>Medicago truncatula</i> (Barrel medic)                    |
| LjT46P06.100.nd    | 434 | (Q1SVR4) Hypothetical protein - <i>Medicago truncatula</i> (Barrel medic)                                                 |
| LjT46P10.200.nd    | 138 | (O04180) Pge1 protein - <i>Lotus japonicus</i>                                                                            |
| LjT47D03.100.nd    | 148 | (A2Q6G3) TIR; AAA ATPase - <i>Medicago truncatula</i> (Barrel medic)                                                      |
| LjT47H21.20.nd     | 283 | (Q1SN43) Nucleic acid-binding, OB-fold, subgroup - <i>Medicago truncatula</i> (Barrel medic)                              |
| chr1.CM0001.150.nd | 184 | (Q8GYP3) Hypothetical protein At2g30280 - <i>Arabidopsis thaliana</i> (Mouse-ear cress)                                   |

|                     |     |                                                                                                                                                                   |
|---------------------|-----|-------------------------------------------------------------------------------------------------------------------------------------------------------------------|
| chr1.CM0001.210.nd  | 139 | (Q9FNC0) GblAAD10670.1 (Hypothetical protein) (Hypothetical protein At5g44060) (Hypothetical protein At5g44060/MRH10_17) - Arabidopsis thaliana (Mouse-ear cress) |
| chr1.CM0012.640.nd  | 96  | (A3AE38) Hypothetical protein - Oryza sativa (japonica cultivar-group)                                                                                            |
| chr1.CM0016.200.nc  | 218 | (Q1S6N3) Hypothetical protein - Medicago truncatula (Barrel medic)                                                                                                |
| chr1.CM0017.470.nc  | 52  | (A3B432) Hypothetical protein - Oryza sativa (japonica cultivar-group)                                                                                            |
| chr1.CM0033.530.nc  | 115 | (Q6NLG8) At4g33550 - Arabidopsis thaliana (Mouse-ear cress)                                                                                                       |
| chr1.CM0078.60.nc   | 458 | (Q681X9) Hypothetical protein At1g21560 - Arabidopsis thaliana (Mouse-ear cress)                                                                                  |
| chr1.CM0088.160.nd  | 93  | (A2WTT4) Hypothetical protein - Oryza sativa (indica cultivar-group)                                                                                              |
| chr1.CM0094.430.nd  | 115 | (Q6NLG8) At4g33550 - Arabidopsis thaliana (Mouse-ear cress)                                                                                                       |
| chr1.CM0101.170.nc  | 320 | (Q9LQJ0) F28G4.15 protein (Hypothetical protein) - Arabidopsis thaliana (Mouse-ear cress)                                                                         |
| chr1.CM0104.80.nd   | 63  | (Q1S020) 2OG-Fe(II) oxygenase - Medicago truncatula (Barrel medic)                                                                                                |
| chr1.CM0105.500.nc  | 110 | (Q1SHH1) Ribosomal protein 60S - Medicago truncatula (Barrel medic)                                                                                               |
| chr1.CM0105.650.nc  | 102 | (Q1SIU5) O-methyltransferase, family 2 - Medicago truncatula (Barrel medic)                                                                                       |
| chr1.CM0109.160.nd  | 64  | (Q1RV36) Ribosomal protein L19e - Medicago truncatula (Barrel medic)                                                                                              |
| chr1.CM0113.240.nc  | 86  | (A1C1I1) Apocytochrome b (Fragment) - Eichhornia azurea                                                                                                           |
| chr1.CM0113.380.nd  | 210 | (A3B010) Hypothetical protein - Oryza sativa (japonica cultivar-group)                                                                                            |
| chr1.CM0113.450.nd  | 182 | (Q6VN49) Putative cysteine proteinase (Peptidase C1A, papain; Peptidase M14, carboxypeptidase A) - Medicago truncatula (Barrel medic)                             |
| chr1.CM0133.1230.nd | 70  | (Q9FIV1) GblAAF02153.1 - Arabidopsis thaliana (Mouse-ear cress)                                                                                                   |
| chr1.CM0141.120.nd  | 68  | (Q9MBG4) Lipoate protein ligase-like protein - Arabidopsis thaliana (Mouse-ear cress)                                                                             |

|                     |     |                                                                                                                                                            |
|---------------------|-----|------------------------------------------------------------------------------------------------------------------------------------------------------------|
| chr1.CM0145.100.nc  | 107 | (Q1T4Z9) CTP synthase - <i>Medicago truncatula</i> (Barrel medic)                                                                                          |
| chr1.CM0145.350.nd  | 132 | (Q4VSU3) Hcr9-OR2C - <i>Solanum pimpinellifolium</i> (Currant tomato) ( <i>Lycopersicon pimpinellifolium</i> )                                             |
| chr1.CM0147.30.nd   | 62  | (Q0WLF7) Hypothetical protein (At1g61667) - <i>Arabidopsis thaliana</i> (Mouse-ear cress)                                                                  |
| chr1.CM0147.690.nc  | 671 | (Q9FNS1) MYB-like DNA-binding protein - <i>Catharanthus roseus</i> (Rosy periwinkle) (Madagascar periwinkle)                                               |
| chr1.CM0147.740.nc  | 128 | (Q1S2F4) UDP-glucose glucosyltransferase - <i>Medicago truncatula</i> (Barrel medic)                                                                       |
| chr1.CM0147.920.nc  | 247 | (Q65XA5) Hypothetical protein OJ1654_B10.13 (Hypothetical protein) (Os05g0115600 protein) (Unknow protein) - <i>Oryza sativa</i> (japonica cultivar-group) |
| chr1.CM0150.180.nd  | 80  | (Q1S2B0) No apical meristem (NAM) protein - <i>Medicago truncatula</i> (Barrel medic)                                                                      |
| chr1.CM0150.360.nc  | 166 | (Q9ATD0) WD1521 - <i>Gossypium hirsutum</i> (Upland cotton) ( <i>Gossypium mexicanum</i> )                                                                 |
| chr1.CM0171.850.nd  | 125 | (Q8GT65) Serpin-like protein (Fragment) - <i>Citrus paradisi</i> (Grapefruit)                                                                              |
| chr1.CM0171.880.nd  | 226 | (A2Q2N0) Proteinase inhibitor I4, serpin - <i>Medicago truncatula</i> (Barrel medic)                                                                       |
| chr1.CM0178.160.nd  | 124 | (Q1S7V9) At1g05410/T25N20_5 (Hypothetical protein) - <i>Medicago truncatula</i> (Barrel medic)                                                             |
| chr1.CM0192.120.nc  | 180 | (A3CES3) Hypothetical protein - <i>Oryza sativa</i> (japonica cultivar-group)                                                                              |
| chr1.CM0192.130.nc  | 76  | (Q69UZ3) Putative ATP-dependent proteinase LON2 - <i>Oryza sativa</i> (japonica cultivar-group)                                                            |
| chr1.CM0206.1000.nd | 125 | (Q1SRV3) Pathogenesis-related transcriptional factor and ERF - <i>Medicago truncatula</i> (Barrel medic)                                                   |

|                     |     |                                                                                                                                                |
|---------------------|-----|------------------------------------------------------------------------------------------------------------------------------------------------|
| chr1.CM0248.440.nc  | 108 | (Q2HTD6) RNA-binding region RNP-1 (RNA recognition motif); Calcium-binding EF-hand - Medicago truncatula (Barrel medic)                        |
| chr1.CM0269.30.nd   | 166 | (Q7X8D0) OSJNBa0035M09.3 protein (Hypothetical protein) (OSJNBb0015N08.13 protein) - Oryza sativa (japonica cultivar-group)                    |
| chr1.CM0275.140.nd  | 95  | (Q42792) Asparagine synthetase (EC 6.3.5.4) - Glycine max (Soybean)                                                                            |
| chr1.CM0284.150.nd  | 384 | (Q1RW53) Cyclin-like F-box; F-box protein interaction domain - Medicago truncatula (Barrel medic)                                              |
| chr1.CM0284.170.nc  | 288 | (Q2HV76) F-box protein interaction domain; Galactose oxidase, central - Medicago truncatula (Barrel medic)                                     |
| chr1.CM0295.1070.nc | 246 | (A4GZJ9) HECT - Medicago truncatula (Barrel medic)                                                                                             |
| chr1.CM0295.330.nd  | 187 | (Q43411) SRK3 gene - Brassica oleracea (Wild cabbage)                                                                                          |
| chr1.CM0315.70.nd   | 302 | (A2WU16) Hypothetical protein - Oryza sativa (indica cultivar-group)                                                                           |
| chr1.CM0316.40.nd   | 211 | (Q1SVM0) Cyclin-like F-box - Medicago truncatula (Barrel medic)                                                                                |
| chr1.CM0318.710.nd  | 76  | (Q1SHW4) Hypothetical protein - Medicago truncatula (Barrel medic)                                                                             |
| chr1.CM0320.110.nc  | 234 | (Q9FN67) GblAAD56319.1 (Hypothetical protein At5g41330) (At5g41330) - Arabidopsis thaliana (Mouse-ear cress)                                   |
| chr1.CM0322.100.nc  | 151 | (A2Y959) Hypothetical protein - Oryza sativa (indica cultivar-group)                                                                           |
| chr1.CM0361.40.nd   | 214 | (Q38HU4) Thaliana 60S ribosomal protein L7 (At2g44120) - Solanum tuberosum (Potato)                                                            |
| chr1.CM0371.240.nc  | 88  | (Q1RTR5) Hypothetical protein - Medicago truncatula (Barrel medic)                                                                             |
| chr1.CM0393.320.nd  | 187 | (Q9LPF6) T12C22.2 protein (Hypothetical protein At1g44750) (Hypothetical protein At1g44750; T12C22.2) - Arabidopsis thaliana (Mouse-ear cress) |
| chr1.CM0393.40.nd   | 81  | (Q9FLK9) Leucine-rich repeat disease resistance protein-like (Cf-5 disease resistance protein-like) - Arabidopsis thaliana (Mouse-ear cress)   |

|                      |     |                                                                                                                                      |
|----------------------|-----|--------------------------------------------------------------------------------------------------------------------------------------|
| chr1.CM0442.400.nd   | 221 | (Q1SIQ4) Transcription factor, MADS-box - Medicago truncatula (Barrel medic)                                                         |
| chr1.CM0579.360.nd   | 75  | (Q9M308) Hypothetical protein F2A19.210 - Arabidopsis thaliana (Mouse-ear cress)                                                     |
| chr1.CM0591.290.nd   | 168 | (Q3EA28) Protein At4g14805 - Arabidopsis thaliana (Mouse-ear cress)                                                                  |
| chr1.CM0593.90.nd    | 123 | (Q9LT84) EmblCAB62003.1 - Arabidopsis thaliana (Mouse-ear cress)                                                                     |
| chr1.CM1956.580.nc   | 71  | (Q1S774) Hypothetical protein - Medicago truncatula (Barrel medic)                                                                   |
| chr1.LjB10L14.60.nc  | 115 | (Q7XHX6) Putative vacuolar targeting receptor (Hypothetical protein) (Os07g0680000 protein) - Oryza sativa (japonica cultivar-group) |
| chr1.LjB21G05.130.nc | 120 | (Q8H8M5) Putative kinase - Oryza sativa (japonica cultivar-group)                                                                    |
| chr1.LjT04O21.120.nd | 83  | (Q1SD45) Hypothetical protein - Medicago truncatula (Barrel medic)                                                                   |
| chr1.LjT08E15.170.nd | 109 | (Q9LZS6) Cucumisin-like protein - Arabidopsis thaliana (Mouse-ear cress)                                                             |
| chr1.LjT08H21.20.nd  | 104 | (Q9M0R3) Hypothetical protein AT4g09150 - Arabidopsis thaliana (Mouse-ear cress)                                                     |
| chr1.LjT10B06.110.nd | 77  | (Q2HUD0) WD40-like - Medicago truncatula (Barrel medic)                                                                              |
| chr1.LjT14B18.60.nc  | 150 | (A2Z2A7) Hypothetical protein - Oryza sativa (indica cultivar-group)                                                                 |
| chr1.LjT14G19.20.nc  | 346 | (Q1SPD3) Cyclin-like F-box; F-box protein interaction domain - Medicago truncatula (Barrel medic)                                    |
| chr1.LjT16J16.120.nd | 142 | (Q6IQZ0) Hypothetical protein - Mus musculus (Mouse)                                                                                 |
| chr1.LjT29L06.180.nd | 122 | (Q9ZUN5) Putative senescence-associated protein 5 (At2g19580) - Arabidopsis thaliana (Mouse-ear cress)                               |

|                      |     |                                                                                                                                         |
|----------------------|-----|-----------------------------------------------------------------------------------------------------------------------------------------|
| chr1.LjT29L18.10.nd  | 110 | (Q8S8S4) Putative flavonol synthase - Arabidopsis thaliana (Mouse-ear cress)                                                            |
| chr1.LjT30M08.120.nd | 72  | (Q1SSA4) Hypothetical protein - Medicago truncatula (Barrel medic)                                                                      |
| chr1.LjT34H22.260.nd | 149 | (Q1SF17) Heat shock protein Hsp70 - Medicago truncatula (Barrel medic)                                                                  |
| chr1.LjT35H06.70.nc  | 717 | (A3A4L0) Hypothetical protein - Oryza sativa (japonica cultivar-group)                                                                  |
| chr1.LjT36G06.100.nc | 98  | (Q1S2B0) No apical meristem (NAM) protein - Medicago truncatula (Barrel medic)                                                          |
| chr1.LjT36G06.130.nc | 167 | (Q8GZD8) Neutral leucine aminopeptidase preprotein precursor (EC 3.4.11.1) - Solanum lycopersicum (Tomato) (Lycopersicon esculentum)    |
| chr1.LjT36I17.90.nd  | 89  | (A1L4U4) At5g64300 - Arabidopsis thaliana (Mouse-ear cress)                                                                             |
| chr1.LjT36P09.120.nd | 155 | (Q8S4X3) TIR-similar-domain-containing protein TSDC - Pisum sativum (Garden pea)                                                        |
| chr1.LjT43L07.160.nd | 128 | (Q9STP2) Hypothetical protein T27E11.80 (At4g27840/T27E11_80) (Hypothetical protein AT4g27840) - Arabidopsis thaliana (Mouse-ear cress) |
| chr1.LjT44L17.210.nd | 73  | (Q1SHX0) Ribosomal protein S2; Oligopeptide transporter OPT superfamily - Medicago truncatula (Barrel medic)                            |
| chr1.LjT45O14.20.nd  | 130 | (Q9C651) Hypothetical protein F9K23.1 - Arabidopsis thaliana (Mouse-ear cress)                                                          |
| chr1.LjT46N10.200.nd | 189 | (Q1S0T7) Cyclin-like F-box; F-box protein interaction domain; Galactose oxidase, central - Medicago truncatula (Barrel medic)           |
| chr2.CM0008.600.nc   | 210 | (Q1S8R3) Hypothetical protein - Medicago truncatula (Barrel medic)                                                                      |
| chr2.CM0018.260.nd   | 94  | (Q1T0B9) IMP dehydrogenase/GMP reductase - Medicago truncatula (Barrel medic)                                                           |
| chr2.CM0018.880.nc   | 163 | (Q3EA10) Protein At4g16195 - Arabidopsis thaliana (Mouse-ear cress)                                                                     |



|                     |     |                                                                                                            |
|---------------------|-----|------------------------------------------------------------------------------------------------------------|
| chr2.CM0020.20.nd   | 323 | (Q2HW84) Cyclin-like F-box - <i>Medicago truncatula</i> (Barrel medic)                                     |
| chr2.CM0020.40.nd   | 314 | (Q2HW84) Cyclin-like F-box - <i>Medicago truncatula</i> (Barrel medic)                                     |
| chr2.CM0021.1200.nd | 69  | (Q1W203) NAK-type protein kinase - <i>Nicotiana tabacum</i> (Common tobacco)                               |
| chr2.CM0021.400.nc  | 298 | (A0MEP3) Hypothetical protein (Fragment) - <i>Arabidopsis thaliana</i> (Mouse-ear cress)                   |
| chr2.CM0031.10.nd   | 90  | (Q2PHF4) Aldehyde oxidase 1 - <i>Lactuca sativa</i> (Garden lettuce)                                       |
| chr2.CM0056.130.nd  | 91  | (Q1S950) Zinc finger, RING-type; RINGv - <i>Medicago truncatula</i> (Barrel medic)                         |
| chr2.CM0056.200.nd  | 49  | (Q1T048) Hypothetical protein - <i>Medicago truncatula</i> (Barrel medic)                                  |
| chr2.CM0058.420.nd  | 178 | (Q1SXV2) No apical meristem (NAM) protein - <i>Medicago truncatula</i> (Barrel medic)                      |
| chr2.CM0060.330.nd  | 164 | (Q9FQZ4) Avr9/Cf-9 rapidly elicited protein 194 - <i>Nicotiana tabacum</i> (Common tobacco)                |
| chr2.CM0081.350.nd  | 259 | (Q2HTU0) Glycoside hydrolase, family 5; Ricin B-related lectin - <i>Medicago truncatula</i> (Barrel medic) |
| chr2.CM0081.410.nd  | 155 | (Q1S510) Protein kinase - <i>Medicago truncatula</i> (Barrel medic)                                        |
| chr2.CM0081.530.nd  | 255 | (Q2HTU0) Glycoside hydrolase, family 5; Ricin B-related lectin - <i>Medicago truncatula</i> (Barrel medic) |
| chr2.CM0099.200.nd  | 982 | (Q5XWR0) Hypothetical protein - <i>Solanum tuberosum</i> (Potato)                                          |
| chr2.CM0124.150.nd  | 81  | (Q9SB33) SRG1-like protein - <i>Arabidopsis thaliana</i> (Mouse-ear cress)                                 |
| chr2.CM0124.260.nd  | 102 | (Q9SB33) SRG1-like protein - <i>Arabidopsis thaliana</i> (Mouse-ear cress)                                 |
| chr2.CM0177.730.nc  | 117 | (A2Q3L5) Zinc finger, CCCH-type - <i>Medicago truncatula</i> (Barrel medic)                                |
| chr2.CM0191.190.nc  | 128 | (Q1ENZ8) Hypothetical protein - <i>Musa acuminata</i> (Banana)                                             |

|                     |     |                                                                                                              |
|---------------------|-----|--------------------------------------------------------------------------------------------------------------|
| chr2.CM0201.380.nc  | 194 | (Q1SHW9) Ribosomal protein S2; Oligopeptide transporter OPT superfamily - Medicago truncatula (Barrel medic) |
| chr2.CM0225.290.nd  | 118 | (Q1S4Z8) AAA ATPase - Medicago truncatula (Barrel medic)                                                     |
| chr2.CM0225.80.nc   | 146 | (Q1SHX1) Oligopeptide transporter OPT superfamily - Medicago truncatula (Barrel medic)                       |
| chr2.CM0249.1280.nc | 191 | (Q1XI26) PvLEA1 protein - Polypedilum vanderplanki (sleeping chironomid)                                     |
| chr2.CM0249.1340.nc | 107 | (A2YSA4) Hypothetical protein - Oryza sativa (indica cultivar-group)                                         |
| chr2.CM0249.310.nd  | 258 | (A3AW23) Hypothetical protein - Oryza sativa (japonica cultivar-group)                                       |
| chr2.CM0249.850.nd  | 145 | (A3AYA2) Hypothetical protein - Oryza sativa (japonica cultivar-group)                                       |
| chr2.CM0250.220.nd  | 52  | (Q7PQY7) ENSANGP00000011061 - Anopheles gambiae str. PEST                                                    |
| chr2.CM0304.100.nd  | 129 | (Q1RVC3) Hypothetical protein - Medicago truncatula (Barrel medic)                                           |
| chr2.CM0323.170.nc  | 218 | (Q8GVI7) Putative thaumatin-like protein - Oryza sativa (japonica cultivar-group)                            |
| chr2.CM0323.220.nc  | 160 | (Q8LBP3) Hypothetical protein - Arabidopsis thaliana (Mouse-ear cress)                                       |
| chr2.CM0405.80.nd   | 218 | (Q9LHB3) Gb AAB97123.1 - Arabidopsis thaliana (Mouse-ear cress)                                              |
| chr2.CM0545.140.nd  | 147 | (Q1SM53) Hypothetical protein - Medicago truncatula (Barrel medic)                                           |
| chr2.CM0545.150.nd  | 96  | (Q1S1E7) Hypothetical protein - Medicago truncatula (Barrel medic)                                           |
| chr2.CM0545.160.nd  | 70  | (Q1MX17) Aldehyde oxidase - Brassica campestris (Field mustard)                                              |
| chr2.CM0545.690.nc  | 90  | (Q84W73) Putative cell division-related protein - Arabidopsis thaliana (Mouse-ear cress)                     |
| chr2.CM0608.250.nd  | 110 | (A2Q2R1) Thioredoxin domain 2; Thioredoxin fold - Medicago truncatula (Barrel medic)                         |
| chr2.CM0695.360.nd  | 73  | (Q8H241) Hypothetical protein - Gossypium hirsutum (Upland cotton)                                           |

|                      |     |                                                                                                                                                               |
|----------------------|-----|---------------------------------------------------------------------------------------------------------------------------------------------------------------|
| chr2.CM0749.120.nd   | 121 | (Q1SGX6) Peptidase S10, serine carboxypeptidase - Medicago truncatula (Barrel medic)                                                                          |
| chr2.CM0803.770.nd   | 82  | (Q9LW56) Similarity to long chain fatty alcohol oxidase (At3g23410/MLM24_23) - Arabidopsis thaliana (Mouse-ear cress)                                         |
| chr2.CM0904.190.nd   | 51  | (Q9SUC7) Hypothetical protein T13K14.10 (Hypothetical protein AT4g20850) - Arabidopsis thaliana (Mouse-ear cress)                                             |
| chr2.CM0904.70.nd    | 100 | (Q1S0S9) Hypothetical protein - Medicago truncatula (Barrel medic)                                                                                            |
| chr2.CM1032.310.nc   | 72  | (Q1S121) Heavy metal transport/detoxification protein - Medicago truncatula (Barrel medic)                                                                    |
| chr2.LjT02C03.110.nd | 122 | (Q19PN4) TIR-NBS-LRR-TIR type disease resistance protein (Fragment) - Populus trichocarpa (Western balsam poplar)                                             |
| chr2.LjT02C03.200.nd | 189 | (Q19PN4) TIR-NBS-LRR-TIR type disease resistance protein (Fragment) - Populus trichocarpa (Western balsam poplar)                                             |
| chr2.LjT02E02.30.nd  | 111 | (Q9C4Z6) Guanine nucleotide-binding protein, putative (Putative guanine nucleotide-binding protein) - Arabidopsis thaliana (Mouse-ear cress)                  |
| chr2.LjT10F02.130.nd | 319 | (Q1SCZ2) Transcriptional factor B3 - Medicago truncatula (Barrel medic)                                                                                       |
| chr2.LjT10F02.140.nd | 281 | (Q1SCZ2) Transcriptional factor B3 - Medicago truncatula (Barrel medic)                                                                                       |
| chr2.LjT13P17.210.nd | 86  | (Q1T3I5) Hypothetical protein - Medicago truncatula (Barrel medic)                                                                                            |
| chr2.LjT13P17.230.nd | 372 | (Q9FYK5) F21J9.25 (At1g24590) (Putative AP2/EREBP transcription factor) - Arabidopsis thaliana (Mouse-ear cress)                                              |
| chr2.LjT17A07.210.nd | 239 | (Q9LZ03) Meiosis specific-like protein (At5g02820) (Topoisomerase 6 subunit A) (Putative topoisomerase VI subunit A) - Arabidopsis thaliana (Mouse-ear cress) |

|                      |     |                                                                                                                                    |
|----------------------|-----|------------------------------------------------------------------------------------------------------------------------------------|
| chr2.LjT36E17.20.nd  | 92  | (Q6K5C8) Putative WD repeat protein (Os02g0294600 protein) - <i>Oryza sativa</i> (japonica cultivar-group)                         |
| chr2.LjT46G02.110.nd | 220 | (Q9M5M5) 60S acidic ribosomal protein PO (Fragment) - <i>Euphorbia esula</i> (Leafy spurge)                                        |
| chr2.LjT47G24.10.nd  | 161 | (Q6ZJW3) Putative blue copper binding protein (Hypothetical protein) - <i>Oryza sativa</i> (japonica cultivar-group)               |
| chr2.LjT47G24.110.nd | 155 | (Q1SHX1) Oligopeptide transporter OPT superfamily - <i>Medicago truncatula</i> (Barrel medic)                                      |
| chr2.LjT47G24.90.nd  | 181 | unknown protein                                                                                                                    |
| chr3.CM0059.40.nd    | 325 | (A0DBL2) Chromosome undetermined scaffold_44, whole genome shotgun sequence - <i>Paramecium tetraurelia</i>                        |
| chr3.CM0110.160.nc   | 184 | (Q9LVV3) Genomic DNA, chromosome 5, P1 clone:MNB8 - <i>Arabidopsis thaliana</i> (Mouse-ear cress)                                  |
| chr3.CM0116.440.nd   | 226 | (A3BES0) Hypothetical protein - <i>Oryza sativa</i> (japonica cultivar-group)                                                      |
| chr3.CM0129.360.nd   | 128 | (Q9ZRV4) MLH1 protein (Fragment) - <i>Arabidopsis thaliana</i> (Mouse-ear cress)                                                   |
| chr3.CM0135.20.nc    | 199 | (A3B6L6) Hypothetical protein - <i>Oryza sativa</i> (japonica cultivar-group)                                                      |
| chr3.CM0155.220.nc   | 537 | (Q94B16) Pectin methylesterase PME1 - <i>Vitis vinifera</i> (Grape)                                                                |
| chr3.CM0155.230.nc   | 268 | (A2Q3Z2) Pectinesterase; Pectinesterase inhibitor - <i>Medicago truncatula</i> (Barrel medic)                                      |
| chr3.CM0160.730.nd   | 148 | (Q9ZWC2) F21M11.4 protein - <i>Arabidopsis thaliana</i> (Mouse-ear cress)                                                          |
| chr3.CM0160.950.nd   | 189 | (O22443) Seed coat peroxidase precursor (EC 1.11.1.7) (Seed coat peroxidase) (Peroxidase precursor) - <i>Glycine max</i> (Soybean) |
| chr3.CM0164.270.nd   | 260 | (Q680R1) NAC-domain protein-like - <i>Arabidopsis thaliana</i> (Mouse-ear cress)                                                   |
| chr3.CM0196.190.nc   | 176 | (Q9SWB5) Seed maturation protein PM37 - <i>Glycine max</i> (Soybean)                                                               |

|                    |     |                                                                                                                                                        |
|--------------------|-----|--------------------------------------------------------------------------------------------------------------------------------------------------------|
| chr3.CM0196.90.nc  | 162 | (Q1SW46) Hypothetical protein - Medicago truncatula (Barrel medic)                                                                                     |
| chr3.CM0208.310.nc | 237 | (Q3E8M5) Protein At5g36905 - Arabidopsis thaliana (Mouse-ear cress)                                                                                    |
| chr3.CM0216.260.nc | 258 | (Q1S066) Arabidopsis conserved protein - Medicago truncatula (Barrel medic)                                                                            |
| chr3.CM0216.950.nd | 61  | (Q2HTR2) Cyclin-like F-box - Medicago truncatula (Barrel medic)                                                                                        |
| chr3.CM0216.980.nd | 71  | (Q1S3A0) CAMP response element binding (CREB) protein - Medicago truncatula (Barrel medic)                                                             |
| chr3.CM0279.360.nc | 132 | (Q1SIS5) Immunoglobulin/major histocompatibility complex; Zinc finger, BED-type predicted; Zinc finger, C2H2-type - Medicago truncatula (Barrel medic) |
| chr3.CM0279.80.nd  | 111 | (Q1SAU4) Helicase, C-terminal - Medicago truncatula (Barrel medic)                                                                                     |
| chr3.CM0406.270.nd | 334 | (Q9ZTA8) Homeodomain protein (Fragment) - Malus domestica (Apple) (Malus sylvestris)                                                                   |
| chr3.CM0423.390.nc | 140 | (Q1SAR7) Eukaryotic aspartyl protease, putative - Medicago truncatula (Barrel medic)                                                                   |
| chr3.CM0574.170.nd | 101 | (Q9FJ71) Arabidopsis thaliana genomic DNA, chromosome 5, P1 clone:MTE17 - Arabidopsis thaliana (Mouse-ear cress)                                       |
| chr3.CM0590.410.nd | 82  | (Q84PM9) Putative COP-1 interacting protein 7 (Fragment) - Gossypium hirsutum (Upland cotton)                                                          |
| chr3.CM0590.820.nc | 165 | (Q04129) Wound induced protein (Fragment) - Solanum lycopersicum (Tomato) (Lycopersicon esculentum)                                                    |
| chr3.CM0590.830.nc | 168 | (Q04129) Wound induced protein (Fragment) - Solanum lycopersicum (Tomato) (Lycopersicon esculentum)                                                    |
| chr3.CM0602.160.nc | 214 | (Q1S8I5) Probable Ta11-like non-LTR retroelement protein [imported]- Arabidopsis thaliana - Medicago truncatula (Barrel medic)                         |
| chr3.CM0602.400.nd | 112 | (O64515) YUP8H12R.2 protein - Arabidopsis thaliana (Mouse-ear cress)                                                                                   |

|                      |     |                                                                                                               |
|----------------------|-----|---------------------------------------------------------------------------------------------------------------|
| chr3.CM0634.510.nc   | 194 | (Q8RVP6) Gaiacol peroxidase (EC 1.11.1.7) - <i>Gossypium hirsutum</i> (Upland cotton)                         |
| chr3.CM0634.590.nc   | 194 | (Q8RVP6) Gaiacol peroxidase (EC 1.11.1.7) - <i>Gossypium hirsutum</i> (Upland cotton)                         |
| chr3.CM0690.110.nd   | 123 | (A3AHD9) Hypothetical protein - <i>Oryza sativa</i> (japonica cultivar-group)                                 |
| chr3.CM0726.350.nd   | 118 | (Q2HSU8) Cupin region - <i>Medicago truncatula</i> (Barrel medic)                                             |
| chr3.CM1144.210.nc   | 130 | (Q1S793) Plant self-incompatibility S1 - <i>Medicago truncatula</i> (Barrel medic)                            |
| chr3.LjT03D10.70.nd  | 61  | (A2Q2W3) Hypothetical protein - <i>Medicago truncatula</i> (Barrel medic)                                     |
| chr3.LjT03D10.80.nd  | 61  | (A2Q2W3) Hypothetical protein - <i>Medicago truncatula</i> (Barrel medic)                                     |
| chr3.LjT07H20.260.nd | 68  | (Q1SP72) Ferredoxin - <i>Medicago truncatula</i> (Barrel medic)                                               |
| chr3.LjT13N17.100.nc | 409 | (A3AQC0) Hypothetical protein - <i>Oryza sativa</i> (japonica cultivar-group)                                 |
| chr3.LjT13N17.120.nc | 425 | (A3AQC0) Hypothetical protein - <i>Oryza sativa</i> (japonica cultivar-group)                                 |
| chr3.LjT26B16.190.nd | 335 | (Q8GW43) Putative 8-amino-7-oxononanoate synthase (At5g04620) - <i>Arabidopsis thaliana</i> (Mouse-ear cress) |
| chr4.CM0003.210.nc   | 147 | (A3B5R3) Hypothetical protein - <i>Oryza sativa</i> (japonica cultivar-group)                                 |
| chr4.CM0004.160.nd   | 72  | (A1KXE2) Putative ribosomal protein L31 - <i>Lactuca sativa</i> (Garden lettuce)                              |
| chr4.CM0004.250.nd   | 164 | (Q1S606) Heat shock protein DnaJ - <i>Medicago truncatula</i> (Barrel medic)                                  |
| chr4.CM0006.490.nc   | 113 | (Q73XI0) Bcp - <i>Mycobacterium paratuberculosis</i>                                                          |
| chr4.CM0006.500.nc   | 86  | (Q9LMA2) T29M8.11 (Hypothetical protein At1g19240) - <i>Arabidopsis thaliana</i> (Mouse-ear cress)            |
| chr4.CM0007.680.nd   | 56  | (Q1SA81) Hypothetical protein - <i>Medicago truncatula</i> (Barrel medic)                                     |
| chr4.CM0007.890.nd   | 86  | (Q4U4M3) Subtilisin-like protease (Fragment) - <i>Arachis hypogaea</i> (Peanut)                               |

|                     |     |                                                                                                     |
|---------------------|-----|-----------------------------------------------------------------------------------------------------|
| chr4.CM0042.1020.nd | 60  | (Q9ZNU5) Hypothetical protein At2g01610 (At2g01610) - Arabidopsis thaliana (Mouse-ear cress)        |
| chr4.CM0042.1980.nc | 741 | (A0ME24) Hypothetical protein (Fragment) - Arabidopsis thaliana (Mouse-ear cress)                   |
| chr4.CM0042.2590.nd | 68  | (A3BYM6) Hypothetical protein - Oryza sativa (japonica cultivar-group)                              |
| chr4.CM0042.820.nc  | 85  | (Q1RYL4) Serine/threonine protein kinase, active site - Medicago truncatula (Barrel medic)          |
| chr4.CM0042.910.nc  | 86  | (A3B8R9) Hypothetical protein - Oryza sativa (japonica cultivar-group)                              |
| chr4.CM0044.130.nd  | 123 | (A2ZET1) Hypothetical protein - Oryza sativa (indica cultivar-group)                                |
| chr4.CM0044.240.nd  | 121 | (Q8LCV8) Hypothetical protein - Arabidopsis thaliana (Mouse-ear cress)                              |
| chr4.CM0044.280.nd  | 202 | (Q9LDN0) Phragmoplast-associated kinesin-related protein 1 - Arabidopsis thaliana (Mouse-ear cress) |
| chr4.CM0046.420.nc  | 121 | (Q9FQE4) Glutathione S-transferase GST 14 (EC 2.5.1.18) (Fragment) - Glycine max (Soybean)          |
| chr4.CM0128.180.nc  | 460 | (Q382P4) Hypothetical protein - Trypanosoma brucei                                                  |
| chr4.CM0131.630.nc  | 122 | (Q6NLG8) At4g33550 - Arabidopsis thaliana (Mouse-ear cress)                                         |
| chr4.CM0165.220.nd  | 96  | (Q9M839) T27C4.13 protein - Arabidopsis thaliana (Mouse-ear cress)                                  |
| chr4.CM0170.280.nc  | 307 | (A2Q681) Ribonuclease H - Medicago truncatula (Barrel medic)                                        |
| chr4.CM0175.140.nd  | 165 | (Q9FIT8) GCN4-complementing protein homolog - Arabidopsis thaliana (Mouse-ear cress)                |
| chr4.CM0175.250.nd  | 77  | (Q8VZ20) Hypothetical protein At2g33550 - Arabidopsis thaliana (Mouse-ear cress)                    |
| chr4.CM0179.280.nc  | 669 | (Q69P59) Hypothetical protein OJ1740_D06.20 - Oryza sativa (japonica cultivar-group)                |

|                    |     |                                                                                                                     |
|--------------------|-----|---------------------------------------------------------------------------------------------------------------------|
| chr4.CM0182.170.nc | 83  | (Q944L5) At1g26740/T24P13_11 - Arabidopsis thaliana (Mouse-ear cress)                                               |
| chr4.CM0182.210.nd | 92  | (Q944L5) At1g26740/T24P13_11 - Arabidopsis thaliana (Mouse-ear cress)                                               |
| chr4.CM0227.30.nd  | 76  | (Q8VXZ5) Hypothetical protein At2g35610 - Arabidopsis thaliana (Mouse-ear cress)                                    |
| chr4.CM0281.10.nd  | 60  | (Q1SPA4) SAM (And some other nucleotide) binding motif - Medicago truncatula (Barrel medic)                         |
| chr4.CM0288.300.nd | 232 | (Q39814) Hypothetical protein (Fragment) - Glycine max (Soybean)                                                    |
| chr4.CM0337.260.nc | 149 | (Q17U53) DNA-directed RNA polymerase, putative - Solanum bulbocastanum (Wild potato)                                |
| chr4.CM0387.240.nc | 140 | (Q1RUQ0) Nonaspanin (TM9SF) - Medicago truncatula (Barrel medic)                                                    |
| chr4.CM0500.110.nd | 88  | (Q1SGK8) Leucine-rich repeat; Leucine-rich repeat, cysteine-containing subtype - Medicago truncatula (Barrel medic) |
| chr4.CM0558.110.nd | 77  | (Q1RY76) Mitochondrial substrate carrier - Medicago truncatula (Barrel medic)                                       |
| chr4.CM0617.10.nd  | 83  | (Q1SEA4) AT5g11700/T22P22_90 - Medicago truncatula (Barrel medic)                                                   |
| chr4.CM0617.450.nd | 53  | (A2ZXD7) Hypothetical protein - Oryza sativa (japonica cultivar-group)                                              |
| chr4.CM0692.110.nd | 115 | (Q53YQ2) AS2 (At1g65620) - Arabidopsis thaliana (Mouse-ear cress)                                                   |
| chr4.CM0692.370.nd | 270 | (Q9CAS4) Hypothetical protein T17F3.6 - Arabidopsis thaliana (Mouse-ear cress)                                      |
| chr4.CM0692.630.nd | 80  | (Q9SSM3) Similar to jacalin (At1g73040) - Arabidopsis thaliana (Mouse-ear cress)                                    |
| chr4.CM1334.80.nc  | 130 | (O49715) Hypothetical protein T8O5.130 (Hypothetical protein AT4g21920) - Arabidopsis thaliana (Mouse-ear cress)    |
| chr4.CM1334.90.nc  | 132 | (O49715) Hypothetical protein T8O5.130 (Hypothetical protein AT4g21920) - Arabidopsis thaliana (Mouse-ear cress)    |



|                      |     |                                                                                                           |
|----------------------|-----|-----------------------------------------------------------------------------------------------------------|
| chr4.LjT13D08.210.nd | 154 | (Q9XED4) Receptor-like protein kinase homolog RK20-1 - Phaseolus vulgaris (Kidney bean) (French bean)     |
| chr4.LjT21A22.200.nd | 60  | (Q8VYC4) Putative sun protein fmu (Putative sun (Fmu) protein) - Arabidopsis thaliana (Mouse-ear cress)   |
| chr4.LjT30K03.130.nc | 267 | (Q5N7S4) Receptor serine/threonine kinase PR5K-like - Oryza sativa (japonica cultivar-group)              |
| chr4.LjT32J05.160.nc | 144 | (A0JPW5) At3g21490 - Arabidopsis thaliana (Mouse-ear cress)                                               |
| chr4.LjT38A20.30.nd  | 114 | (Q1RUQ0) Nonaspanin (TM9SF) - Medicago truncatula (Barrel medic)                                          |
| chr4.LjT38A20.60.nd  | 91  | (Q2A9D6) Hypothetical protein - Brassica oleracea (Wild cabbage)                                          |
| chr4.LjT45J24.70.nc  | 70  | (Q8LF02) Hypothetical protein (At1g73090) - Arabidopsis thaliana (Mouse-ear cress)                        |
| chr5.CM0019.110.nd   | 71  | (Q1SX83) Hypothetical protein - Medicago truncatula (Barrel medic)                                        |
| chr5.CM0019.410.nc   | 398 | (Q9FYX4) BAC19.2 - Solanum lycopersicum (Tomato) (Lycopersicon esculentum)                                |
| chr5.CM0040.150.nd   | 143 | (Q1SQL2) 4Fe-4S ferredoxin, iron-sulfur binding - Medicago truncatula (Barrel medic)                      |
| chr5.CM0040.620.nd   | 70  | (Q8RXN4) Putative enoyl-CoA hydratase - Arabidopsis thaliana (Mouse-ear cress)                            |
| chr5.CM0052.160.nd   | 226 | (Q1T0J6) Cupredoxin - Medicago truncatula (Barrel medic)                                                  |
| chr5.CM0052.330.nd   | 126 | (Q1SFG0) Glycoside hydrolase, family 10; DNA repair protein RadA - Medicago truncatula (Barrel medic)     |
| chr5.CM0089.1040.nd  | 51  | (Q1S2L8) Transcriptional factor B3; Cupredoxin; TonB box, N-terminal - Medicago truncatula (Barrel medic) |
| chr5.CM0089.970.nd   | 191 | (A1L4Y7) At4g10400 - Arabidopsis thaliana (Mouse-ear cress)                                               |

|                    |     |                                                                                                                                                                                                                    |
|--------------------|-----|--------------------------------------------------------------------------------------------------------------------------------------------------------------------------------------------------------------------|
| chr5.CM0095.330.nd | 101 | (Q2HTK4) Protein kinase; U box - Medicago truncatula (Barrel medic)                                                                                                                                                |
| chr5.CM0148.150.nd | 72  | (A3A9W2) Hypothetical protein - Oryza sativa (japonica cultivar-group)                                                                                                                                             |
| chr5.CM0158.310.nd | 137 | (Q7XVH0) OSJNBa0073L04.11 protein (Hypothetical protein)<br>(Os04g0412800 protein) (OJ000126_13.3 protein) - Oryza sativa (japonica cultivar-group)                                                                |
| chr5.CM0211.30.nc  | 361 | (A3BJL3) Hypothetical protein - Oryza sativa (japonica cultivar-group)                                                                                                                                             |
| chr5.CM0239.860.nd | 77  | (Q9FV64) NTS1 protein - Nicotiana tabacum (Common tobacco)                                                                                                                                                         |
| chr5.CM0278.310.nc | 64  | (Q8RWQ5) AT5g54860/MBG8_12 - Arabidopsis thaliana (Mouse-ear cress)                                                                                                                                                |
| chr5.CM0328.280.nd | 557 | (Q1SUB1) RNA polymerase Rpb2, domain 4; RNA polymerase Rpb2, domain 5 - Medicago truncatula (Barrel medic)                                                                                                         |
| chr5.CM0345.470.nc | 125 | (Q9LRV8) Leucine-rich-repeat protein-like (Plant intracellular Ras-group-related LRR protein 2) (Hypothetical protein At3g26500) (Hypothetical protein At3g26500/MFE16_1) - Arabidopsis thaliana (Mouse-ear cress) |
| chr5.CM0456.160.nd | 140 | (Q2HY53) AtpE (Fragment) - Leucophyllum frutescens (Texas ranger) (Ceniza)                                                                                                                                         |
| chr5.CM0456.400.nd | 95  | (Q1SHZ1) DNA binding protein E4/E8BP-1-tomato-related - Medicago truncatula (Barrel medic)                                                                                                                         |
| chr5.CM0494.330.nc | 142 | (Q1SCX0) Pathogenesis-related transcriptional factor and ERF - Medicago truncatula (Barrel medic)                                                                                                                  |
| chr5.CM0569.220.nc | 352 | (Q9FYX4) BAC19.2 - Solanum lycopersicum (Tomato) (Lycopersicon esculentum)                                                                                                                                         |
| chr5.CM0571.220.nd | 229 | (Q9SSG7) F25A4.12 protein - Arabidopsis thaliana (Mouse-ear cress)                                                                                                                                                 |
| chr5.CM0813.360.nd | 115 | (Q1SXC6) Tetratricopeptide-like helical - Medicago truncatula (Barrel medic)                                                                                                                                       |
| chr5.CM0909.540.nc | 180 | (Q2HV66) Zinc finger, RING-type - Medicago truncatula (Barrel medic)                                                                                                                                               |

|                      |     |                                                                                                   |
|----------------------|-----|---------------------------------------------------------------------------------------------------|
| chr5.CM0909.550.nc   | 163 | (Q1T0Q0) Zinc finger, RING-type; RINGv - Medicago truncatula (Barrel medic)                       |
| chr5.CM0909.560.nc   | 166 | (Q1T0Q0) Zinc finger, RING-type; RINGv - Medicago truncatula (Barrel medic)                       |
| chr5.CM0911.220.nd   | 94  | (A2Q5Q4) Glycoside hydrolase, family 17; X8 - Medicago truncatula (Barrel medic)                  |
| chr5.CM0956.20.nc    | 234 | (Q1SD46) Transcription factor, MADS-box - Medicago truncatula (Barrel medic)                      |
| chr5.CM1125.210.nc   | 190 | (Q1SGL6) Hypothetical protein - Medicago truncatula (Barrel medic)                                |
| chr5.CM1125.590.nd   | 79  | (Q9LV18) EmbiCAA16536.1 (Hypothetical protein At3g18215) - Arabidopsis thaliana (Mouse-ear cress) |
| chr5.CM1439.20.nd    | 106 | (Q5DMV7) Pentatricopeptide (PPR) repeat protein-like - Cucumis melo (Muskmelon)                   |
| chr5.LjT08L18.120.nd | 175 | (Q9LNK3) F12K21.25 (Hypothetical protein F7P12.13) - Arabidopsis thaliana (Mouse-ear cress)       |
| chr5.LjT09B23.60.nd  | 156 | (Q53ML9) Endomembrane protein 70 (Hypothetical protein) - Oryza sativa (japonica cultivar-group)  |
| chr5.LjT23J23.150.nd | 87  | (A4L9G5) Putative integral membrane protein - Gossypium raimondii (New World cotton)              |
| chr6.CM0013.10.nd    | 162 | (A3BZ52) Hypothetical protein - Oryza sativa (japonica cultivar-group)                            |
| chr6.CM0037.1440.nc  | 119 | (Q9ZPJ5) Ran-related GTP binding protein (Fragment) - Zea mays (Maize)                            |
| chr6.CM0037.1760.nc  | 226 | (A2Q681) Ribonuclease H - Medicago truncatula (Barrel medic)                                      |
| chr6.CM0037.930.nc   | 227 | (Q5Y381) Aldo/keto reductase - Fragaria ananassa (Strawberry)                                     |

|                    |     |                                                                                                                                          |
|--------------------|-----|------------------------------------------------------------------------------------------------------------------------------------------|
| chr6.CM0055.370.nd | 173 | (Q9SW15) Hypothetical protein F13M23.250 (Hypothetical protein AT4g25110) - Arabidopsis thaliana (Mouse-ear cress)                       |
| chr6.CM0055.460.nd | 108 | (Q9LVM0) Receptor-like protein kinase (At5g58299/At5g58299) (Hypothetical protein) - Arabidopsis thaliana (Mouse-ear cress)              |
| chr6.CM0055.680.nd | 125 | (O24019) GTP cyclohydrolase II / 3,4-dihydroxy-2-butanone-4-phosphate synthase - Solanum lycopersicum (Tomato) (Lycopersicon esculentum) |
| chr6.CM0057.200.nc | 217 | (Q1SQA9) Hypothetical protein - Medicago truncatula (Barrel medic)                                                                       |
| chr6.CM0057.280.nd | 217 | (Q1SQA9) Hypothetical protein - Medicago truncatula (Barrel medic)                                                                       |
| chr6.CM0057.360.nd | 311 | (Q6H5N4) Hypothetical protein OJ1118_F11.28 (Hypothetical protein) (Os09g0384900 protein) - Oryza sativa (japonica cultivar-group)       |
| chr6.CM0057.420.nc | 114 | (Q9LMX8) F21F23.14 protein (At1g13700) - Arabidopsis thaliana (Mouse-ear cress)                                                          |
| chr6.CM0057.430.nc | 121 | (Q9FJS0) Genomic DNA, chromosome 5, P1 clone:MQD22 - Arabidopsis thaliana (Mouse-ear cress)                                              |
| chr6.CM0066.370.nc | 151 | (Q8L4S3) Hypothetical protein (At5g09390/T5E8_190) - Arabidopsis thaliana (Mouse-ear cress)                                              |
| chr6.CM0139.50.nd  | 154 | (A2Q377) Nucleic acid-binding, OB-fold - Medicago truncatula (Barrel medic)                                                              |
| chr6.CM0314.30.nd  | 98  | (Q1SH78) K <sup>+</sup> potassium transporter - Medicago truncatula (Barrel medic)                                                       |
| chr6.CM0314.530.nd | 101 | (Q1STS0) Peptidase S10, serine carboxypeptidase - Medicago truncatula (Barrel medic)                                                     |
| chr6.CM0314.560.nd | 142 | (A4GNA9) Phosphatidylserine decarboxylase - Arabidopsis thaliana (Mouse-ear cress)                                                       |
| chr6.CM0420.20.nd  | 98  | (Q2HT48) HECT; Ubiquitin - Medicago truncatula (Barrel medic)                                                                            |
| chr6.CM0437.310.nc | 372 | (Q1S4X3) IMP dehydrogenase/GMP reductase - Medicago truncatula (Barrel medic)                                                            |

|                      |     |                                                                                                                                                              |
|----------------------|-----|--------------------------------------------------------------------------------------------------------------------------------------------------------------|
| chr6.CM0437.400.nc   | 75  | (Q1S4Y2) Berberine and berberine like, putative - Medicago truncatula (Barrel medic)                                                                         |
| chr6.CM0437.430.nc   | 161 | (Q1S4Y2) Berberine and berberine like, putative - Medicago truncatula (Barrel medic)                                                                         |
| chr6.CM0472.180.nc   | 95  | (Q2HUI7) V-ATPase subunit C - Medicago truncatula (Barrel medic)                                                                                             |
| chr6.CM0539.180.nd   | 234 | (Q9M8I9) F28L1.23 protein - Arabidopsis thaliana (Mouse-ear cress)                                                                                           |
| chr6.CM0679.150.nd   | 138 | (Q6TF29) Rapid alkalization factor 1 - Solanum chacoense (Chaco potato)                                                                                      |
| chr6.CM0686.240.nd   | 420 | (Q9C6K1) Hypothetical protein F8A12.2 - Arabidopsis thaliana (Mouse-ear cress)                                                                               |
| chr6.CM0836.470.nd   | 286 | (Q9SJV6) Putative ARP2/3 protein complex subunit p41 (At2g31300/F16D14.14) - Arabidopsis thaliana (Mouse-ear cress)                                          |
| chr6.CM0885.280.nc   | 79  | (Q1SKV9) Bromodomain - Medicago truncatula (Barrel medic)                                                                                                    |
| chr6.LjT06I08.70.nc  | 88  | (Q9T0H6) Hypothetical protein T6G15.110 (Hypothetical protein At4g13560) (Hypothetical protein At4g13560/T6G15_110) - Arabidopsis thaliana (Mouse-ear cress) |
| chr6.LjT14A08.40.nd  | 80  | (Q7XLZ1) OSJNBa0086O06.18 protein (Hypothetical protein) (Os04g0590400 protein) - Oryza sativa (japonica cultivar-group)                                     |
| chr6.LjT14A08.80.nd  | 54  | (Q7XLZ1) OSJNBa0086O06.18 protein (Hypothetical protein) (Os04g0590400 protein) - Oryza sativa (japonica cultivar-group)                                     |
| chr6.LjT15B19.180.nd | 97  | (Q944N0) Acyl carrier protein - Olea europaea (Common olive)                                                                                                 |
| chr6.LjT16B20.50.nc  | 104 | (A3ADE6) Hypothetical protein - Oryza sativa (japonica cultivar-group)                                                                                       |
| chr6.LjT36L14.210.nd | 109 | (A2Q396) Galactose mutarotase-like - Medicago truncatula (Barrel medic)                                                                                      |
| chr6.LjT45M04.110.nd | 123 | (Q1SAR1) Annexin, putative - Medicago truncatula (Barrel medic)                                                                                              |

|                 |     |                                                                                                                          |
|-----------------|-----|--------------------------------------------------------------------------------------------------------------------------|
| CM0300.50.nc    | 55  | (Q9FGT4) Genomic DNA, chromosome 5, TAC clone:K21L19 - Arabidopsis thaliana (Mouse-ear cress)                            |
| CM0319.110.nd   | 211 | (Q9C6H1) Hypothetical protein T12I7.9 - Arabidopsis thaliana (Mouse-ear cress)                                           |
| CM0385.120.nd   | 256 | (Q1T0C7) IQ calmodulin-binding region; CG-1 - Medicago truncatula (Barrel medic)                                         |
| CM0547.170.nd   | 92  | (Q6VWJ5) Fructokinase 3 - Solanum lycopersicum (Tomato) (Lycopersicon esculentum)                                        |
| CM0601.150.nd   | 123 | (Q1SB03) Tyrosine protein kinase - Medicago truncatula (Barrel medic)                                                    |
| CM1983.70.nc    | 109 | (Q9FHG9) Similarity to ankyrin - Arabidopsis thaliana (Mouse-ear cress)                                                  |
| LjB03J07.40.nd  | 51  | (Q1SHN8) Hypothetical protein - Medicago truncatula (Barrel medic)                                                       |
| LjB03P03.190.nd | 249 | (Q2HTI8) AT3g20300/MQC12_5 - Medicago truncatula (Barrel medic)                                                          |
| LjB12O06.10.nc  | 54  | (Q7XLZ1) OSJNBa0086O06.18 protein (Hypothetical protein) (Os04g0590400 protein) - Oryza sativa (japonica cultivar-group) |
| LjT01K02.40.nc  | 51  | (Q1SUA5) Hypothetical protein - Medicago truncatula (Barrel medic)                                                       |
| LjT03E06.40.nd  | 465 | (Q8L7V8) AT3g53540/F4P12_240 - Arabidopsis thaliana (Mouse-ear cress)                                                    |
| LjT03L06.20.nd  | 270 | (Q9FIN6) GblAAD32909.1 - Arabidopsis thaliana (Mouse-ear cress)                                                          |
| LjT04N09.230.nd | 132 | (Q9LLZ7) Phytocyanin homolog - Pinus taeda (Loblolly pine)                                                               |
| LjT05D15.240.nd | 106 | (Q1SIQ4) Transcription factor, MADS-box - Medicago truncatula (Barrel medic)                                             |
| LjT05F19.160.nc | 959 | (Q1RXG8) IMP dehydrogenase/GMP reductase - Medicago truncatula (Barrel medic)                                            |
| LjT06B16.100.nc | 443 | (Q8H3K2) Hypothetical protein P0428D12.111 (Hypothetical protein) - Oryza sativa (japonica cultivar-group)               |
| LjT06N02.140.nd | 104 | (Q9FPK9) Putative resistance protein - Glycine max (Soybean)                                                             |

|                 |     |                                                                                                                                                                                              |
|-----------------|-----|----------------------------------------------------------------------------------------------------------------------------------------------------------------------------------------------|
| LjT06N06.260.nd | 151 | (Q6CKI0) <i>Kluyveromyces lactis</i> strain NRRL Y-1140 chromosome F of strain NRRL Y-1140 of <i>Kluyveromyces lactis</i> - <i>Kluyveromyces lactis</i> (Yeast) ( <i>Candida sphaerica</i> ) |
| LjT06N06.350.nd | 129 | (Q1RZB7) Hypothetical protein - <i>Medicago truncatula</i> (Barrel medic)                                                                                                                    |
| LjT06P13.130.nd | 111 | (A3B901) Hypothetical protein - <i>Oryza sativa</i> (japonica cultivar-group)                                                                                                                |
| LjT07J01.40.nd  | 153 | (Q1SAV3) Cyclin-like F-box; F-box protein interaction domain; Galactose oxidase, central - <i>Medicago truncatula</i> (Barrel medic)                                                         |
| LjT10B22.140.nd | 121 | (Q1SYP9) Myb, DNA-binding - <i>Medicago truncatula</i> (Barrel medic)                                                                                                                        |
| LjT10C06.140.nd | 72  | (Q84K13) Putative polygalacturonase - <i>Arabidopsis thaliana</i> (Mouse-ear cress)                                                                                                          |
| LjT10C23.70.nc  | 192 | (Q1SH03) Hypothetical protein - <i>Medicago truncatula</i> (Barrel medic)                                                                                                                    |
| LjT10D02.90.nd  | 77  | (Q1S9W9) Auxin responsive SAUR protein - <i>Medicago truncatula</i> (Barrel medic)                                                                                                           |
| LjT11L09.60.nd  | 113 | (A3AAD6) Hypothetical protein - <i>Oryza sativa</i> (japonica cultivar-group)                                                                                                                |
| LjT12M13.90.nc  | 156 | (Q38706) Cysteine proteinase - <i>Alnus glutinosa</i> (Alder)                                                                                                                                |
| LjT13K07.90.nd  | 51  | (Q9LY62) Hypothetical protein F27K19_10 (Hypothetical protein At3g55830) - <i>Arabidopsis thaliana</i> (Mouse-ear cress)                                                                     |
| LjT14D09.70.nc  | 674 | (Q2HVV1) Hypothetical protein - <i>Medicago truncatula</i> (Barrel medic)                                                                                                                    |
| LjT14H02.180.nd | 81  | (Q9LZ63) 8-amino-7-oxononanoate synthase-like protein - <i>Arabidopsis thaliana</i> (Mouse-ear cress)                                                                                        |
| LjT15D07.30.nc  | 111 | (A0ELV0) Non-S-locus F-box-like protein 2011 (Fragment) - <i>Petunia integrifolia</i> subsp. <i>inflata</i>                                                                                  |
| LjT15F17.90.nd  | 243 | (Q0PJM1) MYB transcription factor MYB54 - <i>Glycine max</i> (Soybean)                                                                                                                       |
| LjT17C10.70.nd  | 57  | (Q1SRB6) Hypothetical protein - <i>Medicago truncatula</i> (Barrel medic)                                                                                                                    |

|                 |     |                                                                                                                                       |
|-----------------|-----|---------------------------------------------------------------------------------------------------------------------------------------|
| LjT17E11.10.nc  | 949 | (Q1RXG8) IMP dehydrogenase/GMP reductase - Medicago truncatula (Barrel medic)                                                         |
| LjT19C19.60.nd  | 170 | (Q1SN20) Hypothetical protein - Medicago truncatula (Barrel medic)                                                                    |
| LjT19N22.70.nd  | 290 | (Q94KU0) ATP8 - Arabidopsis thaliana (Mouse-ear cress)                                                                                |
| LjT19N22.90.nd  | 134 | (Q8LJS7) Homeodomain protein GhHOX2 - Gossypium hirsutum (Upland cotton)                                                              |
| LjT20L14.90.nd  | 62  | (Q1S8W5) Glycoside hydrolase, family 17 - Medicago truncatula (Barrel medic)                                                          |
| LjT21I06.50.nd  | 328 | (Q1SHX0) Ribosomal protein S2; Oligopeptide transporter OPT superfamily - Medicago truncatula (Barrel medic)                          |
| LjT22H02.40.nc  | 138 | (Q8W2N3) Cytochrome P450-dependent fatty acid hydroxylase - Vicia sativa (Spring vetch) (Tare)                                        |
| LjT24M05.100.nc | 932 | (Q1RXG8) IMP dehydrogenase/GMP reductase - Medicago truncatula (Barrel medic)                                                         |
| LjT24M05.170.nc | 96  | (Q1SH78) K <sup>+</sup> potassium transporter - Medicago truncatula (Barrel medic)                                                    |
| LjT30N18.300.nd | 80  | (Q94AG1) AT3g07470/F21O3_18 - Arabidopsis thaliana (Mouse-ear cress)                                                                  |
| LjT32C22.120.nd | 303 | unknown protein                                                                                                                       |
| LjT32C22.130.nd | 297 | unknown protein                                                                                                                       |
| LjT33J24.50.nd  | 224 | (Q6VN49) Putative cysteine proteinase (Peptidase C1A, papain; Peptidase M14, carboxypeptidase A) - Medicago truncatula (Barrel medic) |
| LjT35D08.240.nd | 211 | (Q10A46) Alcohol dehydrogenase 2, putative, expressed (Os10g0159800 protein) - Oryza sativa (japonica cultivar-group)                 |
| LjT35G18.20.nd  | 200 | (Q1SRI1) RNA-directed DNA polymerase (Reverse transcriptase) - Medicago truncatula (Barrel medic)                                     |
| LjT35J12.20.nd  | 232 | (Q3EBG6) Protein At2g44120 - Arabidopsis thaliana (Mouse-ear cress)                                                                   |



|                 |     |                                                                                                                                      |
|-----------------|-----|--------------------------------------------------------------------------------------------------------------------------------------|
| LjT37C05.180.nd | 155 | unknown protein                                                                                                                      |
| LjT37C05.80.nd  | 107 | (Q1G0Z1) Putative spindle disassembly related protein CDC48 - <i>Nicotiana tabacum</i> (Common tobacco)                              |
| LjT37D10.80.nd  | 99  | (A3Z8T2) Photosystem I P700 chlorophyll a apoprotein subunit Ia (PsaA) - <i>Synechococcus</i> sp. RS9917                             |
| LjT37O09.360.nd | 130 | (Q1S6E3) Scarecrow-like protein 3 [imported]- <i>Arabidopsis thaliana</i> -related - <i>Medicago truncatula</i> (Barrel medic)       |
| LjT38B21.40.nc  | 494 | (Q1SGL6) Hypothetical protein - <i>Medicago truncatula</i> (Barrel medic)                                                            |
| LjT38B24.120.nd | 82  | (Q9SWS9) Ribosomal protein S26 - <i>Pisum sativum</i> (Garden pea)                                                                   |
| LjT39P23.170.nd | 183 | (Q19PJ3) TIR-NBS-LRR type disease resistance protein - <i>Populus trichocarpa</i> (Western balsam poplar)                            |
| LjT39P23.40.nd  | 122 | (Q1RSP6) TIR; Disease resistance protein; AAA ATPase; Winged helix repressor DNA-binding - <i>Medicago truncatula</i> (Barrel medic) |
| LjT40J14.110.nc | 127 | (Q9SA38) F3O9.19 protein (At1g16390/F3O9_19) - <i>Arabidopsis thaliana</i> (Mouse-ear cress)                                         |
| LjT40J14.50.nc  | 571 | (A3QRM4) Senescence-associated nodulin 1A - <i>Glycine max</i> (Soybean)                                                             |
| LjT41B11.170.nd | 226 | (A3QVH0) Toll interleukin receptor - <i>Phaseolus vulgaris</i> (Kidney bean) (French bean)                                           |
| LjT41D10.70.nd  | 124 | (Q1SWG9) Heavy metal transport/detoxification protein - <i>Medicago truncatula</i> (Barrel medic)                                    |
| LjT41F16.130.nd | 121 | (Q2HTB8) Harpin-induced 1 - <i>Medicago truncatula</i> (Barrel medic)                                                                |
| LjT41N19.40.nd  | 50  | (A4GGE0) Ribosomal protein S8 - <i>Phaseolus vulgaris</i> (Kidney bean) (French bean)                                                |
| LjT42M11.120.nc | 364 | (Q9LP24) F14D7.1 protein - <i>Arabidopsis thaliana</i> (Mouse-ear cress)                                                             |

|                  |     |                                                                                                                     |
|------------------|-----|---------------------------------------------------------------------------------------------------------------------|
| LjT43N20.110.nc  | 62  | (Q1S278) Proteinase inhibitor I13, potato inhibitor I - <i>Medicago truncatula</i> (Barrel medic)                   |
| LjT44J06.120.nd  | 86  | (Q93X23) Putative chloroplast terpene synthase precursor - <i>Quercus ilex</i> (Holly oak)                          |
| LjT44J06.130.nd  | 124 | (Q93X23) Putative chloroplast terpene synthase precursor - <i>Quercus ilex</i> (Holly oak)                          |
| LjT47D03.110.nd  | 254 | (A2X6W8) Hypothetical protein - <i>Oryza sativa</i> (indica cultivar-group)                                         |
| LjSGA_001771.2   | 381 | (Q5GN36) Serpin (Fragment)                                                                                          |
| LjSGA_003943.1   | 243 | (Q2HVE0) Disease resistance protein; AAA ATPase                                                                     |
| LjSGA_004132.0.1 | 119 | (Q9ZVD0) Expressed protein (Hypothetical protein At2g27100) (C2H2 zinc-finger protein SERRATE) (At2g27100/T20P8.15) |
| LjSGA_005129.0.1 | 54  | (Q5Z845) Hypothetical protein P0468G03.24                                                                           |
| LjSGA_005273.2   | 110 | (Q2HUA2) Proteinase inhibitor I25, cystatin                                                                         |
| LjSGA_005309.1   | 273 | unknown protein                                                                                                     |
| LjSGA_005477.1.1 | 54  | (Q6K2P4) Methylene tetrahydrofolate dehydrogenase-like                                                              |
| LjSGA_005575.0.1 | 83  | (O49896) Hypothetical protein                                                                                       |
| LjSGA_006494.1   | 92  | (Q6NLR7) At5g04070                                                                                                  |
| LjSGA_007172.1   | 176 | (Q94CQ1) Putative RNA-binding like protein                                                                          |
| LjSGA_007195.3   | 65  | (O65884) Major latex-like protein                                                                                   |
| LjSGA_007644.1   | 90  | (Q30D01) Putative 3-dehydroquinate synthase                                                                         |
| LjSGA_007647.1   | 102 | (Q9ZQT9) WERBP-1 protein                                                                                            |
| LjSGA_007648.1   | 125 | (Q9ZQT9) WERBP-1 protein                                                                                            |
| LjSGA_007850.1   | 62  | (Q9SK79) Hypothetical protein At2g20220                                                                             |
| LjSGA_008112.1   | 84  | (Q56SE1) Methyl jasmonate esterase                                                                                  |
| LjSGA_008600.2.1 | 146 | (Q9SCA1) Calcium-binding protein                                                                                    |

|                  |     |                                                                                            |
|------------------|-----|--------------------------------------------------------------------------------------------|
| LjSGA_008663.1   | 86  | (Q9AVC1) Chalcone synthase (EC 2.3.1.74)                                                   |
| LjSGA_008942.1   | 137 | (Q2HS79) Cyclin-like F-box; Agenet                                                         |
| LjSGA_009738.0.1 | 109 | (Q9FKF1) DNA-directed RNA polymerase subunit                                               |
| LjSGA_009761.2   | 74  | (Q2QWK0) Subtilisin inhibitor . [broad bean                                                |
| LjSGA_010377.1   | 375 | (Q93XX2) Hypothetical protein At3g01670; F4P13.21 (At3g01670)                              |
| LjSGA_010548.2   | 216 | (O82711) Profucosidase precursor (EC 3.2.1.51)                                             |
| LjSGA_010711.1   | 52  | (Q942D2) Putative WRKY DNA binding protein (WRKY23) (WRKY transcription factor 23) (WRKY4) |
| LjSGA_011304.1   | 221 | (Q9LXJ7) Hypothetical protein F3C22_70 (Fragment)                                          |
| LjSGA_011595.2   | 283 | (Q8W3F7) Pre-mRNA splicing factor, putative                                                |
| LjSGA_011662.1   | 247 | (Q9FNJ5) Arabidopsis thaliana genomic DNA, chromosome 5, P1 clone:MDJ22                    |
| LjSGA_012121.1   | 134 | (Q9LMI5) T2D23.4 protein                                                                   |
| LjSGA_012185.1   | 227 | (Q2QW52) Transposon protein, putative, CACTA, En/Spm sub-class                             |
| LjSGA_012355.2   | 212 | (Q3EBU0) Protein At2g25850                                                                 |
| LjSGA_013051.1   | 242 | (Q2HSZ7) FAR1 family, putative                                                             |
| LjSGA_013091.2   | 154 | (Q7XRX2) OSJNBb0032E06.5 protein                                                           |
| LjSGA_013115.1   | 234 | (Q2HUI7) Cyclin-like F-box; FBD; Zinc finger, FYVE/PHD-type                                |
| LjSGA_013263.3   | 154 | (Q9QZE4) Signal transducer and activator of transcription 2                                |
| LjSGA_013493.1   | 138 | (Q6UQ08) Putative TIR-NBS type R protein 11                                                |
| LjSGA_013527.1   | 344 | (Q2HUN6) RNA-directed DNA polymerase (Reverse transcriptase); Ribonuclease H               |
| LjSGA_013649.2   | 109 | (Q9LUZ5) Gb AAC80581.1                                                                     |
| LjSGA_013917.1   | 89  | (Q8GYK6) Hypothetical protein At2g32840                                                    |

|                  |     |                                                                                                                      |
|------------------|-----|----------------------------------------------------------------------------------------------------------------------|
| LjSGA_014070.2   | 231 | (Q9FNJ1) Arabidopsis thaliana genomic DNA, chromosome 5, P1 clone:MDJ22                                              |
| LjSGA_014139.1   | 140 | unknown protein                                                                                                      |
| LjSGA_014142.2   | 74  | (Q9LET5) Hypothetical protein T8M16_50                                                                               |
| LjSGA_014321.1   | 74  | (Q6L570) Hypothetical protein OJ1115_D04.1                                                                           |
| LjSGA_014365.1   | 74  | (Q9FG53) GblAAC80581.1                                                                                               |
| LjSGA_014391.0.1 | 115 | (Q6Z8U6) Putative glutathione transporter                                                                            |
| LjSGA_014467.1   | 108 | unknown protein                                                                                                      |
| LjSGA_014483.1   | 97  | (Q8W0Y5) Enod8.1                                                                                                     |
| LjSGA_014912.1.1 | 134 | (Q9LP66) T1N15.20                                                                                                    |
| LjSGA_015052.2   | 67  | (Q9SJI6) Hypothetical protein At2g42700                                                                              |
| LjSGA_015078.1   | 543 | (Q9LRQ0) EmblCAB39684.1                                                                                              |
| LjSGA_015103.1   | 151 | (O49607) Subtilisin proteinase-like (Putative subtilisin serine protease)<br>(Putative subtilisin serine proteinase) |
| LjSGA_015113.1   | 518 | (Q9ZVX1) Putative ubiquitin-conjugating enzyme                                                                       |
| LjSGA_015171.1   | 53  | (Q5ENY3) Respiratory burst oxidase 2 (Fragment)                                                                      |
| LjSGA_015400.1   | 67  | (Q9FHA4) Subtilisin-type protease-like (At5g67090)                                                                   |
| LjSGA_015418.1   | 61  | (Q547H3) Tubulin folding cofactor A                                                                                  |
| LjSGA_015468.1   | 162 | (Q9LFC1) Hypothetical protein F7J8_130                                                                               |
| LjSGA_015473.1   | 216 | (Q6ZHE3) Putative cyclic nucleotide-binding transporter 1                                                            |
| LjSGA_015496.1   | 148 | (Q9SWG9) Inorganic phosphate transporter                                                                             |
| LjSGA_015549.1   | 214 | (Q69QY7) Hypothetical protein OJ1695_D07.22                                                                          |
| LjSGA_015573.1   | 143 | (Q2HS67) F-box associated, putative                                                                                  |
| LjSGA_015707.0.1 | 122 | unknown protein                                                                                                      |
| LjSGA_015906.1   | 623 | (Q9W1X5) CG12781-PA, isoform A (Cg12781-pb, isoform b) (GH04942p)                                                    |

|                  |     |                                                                                          |
|------------------|-----|------------------------------------------------------------------------------------------|
| LjSGA_015939.1   | 101 | (Q6K852) Putative methyltransferase                                                      |
| LjSGA_015943.1.1 | 101 | (Q40156) L.esculentum protein with leucine zipper                                        |
| LjSGA_016033.2.1 | 77  | (Q949H4) Leaf ubiquitous urease (EC 3.5.1.5)                                             |
| LjSGA_016155.1   | 245 | (Q9FNJ4) Arabidopsis thaliana genomic DNA, chromosome 5, P1 clone:MDJ22                  |
| LjSGA_016204.1.1 | 120 | (Q29PU4) At1g68795                                                                       |
| LjSGA_016350.2   | 106 | (Q852S5) Nucleoside diphosphate kinase                                                   |
| LjSGA_016388.2   | 108 | (Q3EDK1) Protein At1g02850                                                               |
| LjSGA_016403.1   | 79  | (Q6H889) Putative zinc-binding protein                                                   |
| LjSGA_016425.1   | 92  | (O04518) F21M12.37 protein                                                               |
| LjSGA_016520.1   | 112 | (Q2HVN4) Probable Na/H antiporter [imported]-Arabidopsis thaliana, putative              |
| LjSGA_016674.1   | 198 | (Q9LDH3) T12C24.5 (F5O11.25) (Hypothetical protein At1g12500/T12C24_29)                  |
| LjSGA_016728.2   | 171 | unknown protein                                                                          |
| LjSGA_016758.1   | 434 | (Q2HSF7) Cyclin-like F-box; F-box protein interaction domain; Galactose oxidase, central |
| LjSGA_016896.1   | 50  | (Q93XQ3) Putative beta-1,3-glucan synthase                                               |
| LjSGA_017029.2   | 60  | (Q8LFK2) Hypothetical protein (Hypothetical protein At3g03270)                           |
| LjSGA_017037.2.1 | 89  | (O64470) Putative anthranilate N-hydroxycinnamoyl/benzoyltransferase                     |
| LjSGA_017136.1   | 82  | (Q6NLT5) At3g21440                                                                       |
| LjSGA_017463.1   | 86  | (Q84ZX0) HEN4                                                                            |
| LjSGA_017537.1.1 | 108 | (Q9LYG5) Lysophospholipase-like protein                                                  |
| LjSGA_017637.1.1 | 127 | (Q84VX5) At4g02100                                                                       |
| LjSGA_017734.1   | 275 | (Q2HV58) Hypothetical protein                                                            |

|                  |     |                                                                               |
|------------------|-----|-------------------------------------------------------------------------------|
| LjSGA_018197.2   | 95  | (Q8RXT2) Hypothetical protein At4g32350                                       |
| LjSGA_018236.1   | 54  | (Q9FJK3) Similarity to MADS-box DNA-binding protein (MADS-box family protein) |
| LjSGA_018295.1   | 282 | (Q9ZUS6) Chloroplast lumen common protein family                              |
| LjSGA_018330.1   | 158 | (Q42433) S3 self-incompatibility protein precursor                            |
| LjSGA_018382.1   | 120 | (Q8S901) Syringolide-induced protein 14-1-1                                   |
| LjSGA_018480.0.1 | 109 | (Q84XL0) SP3D                                                                 |
| LjSGA_018778.1   | 175 | (Q93ZA0) AT4g13250/F17N18_140                                                 |
| LjSGA_018827.1   | 130 | (Q9SS87) F4P13.22 protein (At3g01680)                                         |
| LjSGA_018848.1.1 | 136 | (Q7XC13) Expressed protein                                                    |
| LjSGA_019072.1   | 97  | (Q6K8I3) Fertility restorer homologue A-like                                  |
| LjSGA_019080.3   | 293 | (Q2HVE0) Disease resistance protein; AAA ATPase                               |
| LjSGA_019091.2   | 173 | (Q7XMI8) OSJNBb0006N15.11 protein                                             |
| LjSGA_019149.1   | 117 | (Q9FP50) Hypothetical protein P0475H04.20                                     |
| LjSGA_019250.1   | 109 | (Q65XE3) Putative cullin 1                                                    |
| LjSGA_019286.1   | 145 | (Q6YNS0) Putative translation-initiation factor 3 subunit                     |
| LjSGA_019385.2   | 249 | (Q8H9A2) Dehydration responsive element binding protein 1 like protein        |
| LjSGA_019412.1.1 | 140 | (Q949V7) Hypothetical protein At3g59300                                       |
| LjSGA_019465.1   | 58  | (Q84TF0) At2g37790                                                            |
| LjSGA_019506.1   | 154 | (Q9C7J9) Hypothetical protein F14G9.15 (At1g56240)                            |
| LjSGA_019604.2   | 149 | unknown protein                                                               |
| LjSGA_019700.2   | 162 | (O65510) Putative receptor protein kinase                                     |
| LjSGA_019725.2   | 197 | (P93620) Phosphoinositide-specific phospholipase C (EC 3.1.4.11)              |
| LjSGA_019790.0.1 | 128 | (O48766) Putative glucanase (At2g32990)                                       |
| LjSGA_020175.2   | 92  | (Q940J9) Hypothetical protein At1g04430; F19P19.11                            |

|                  |     |                                                                          |
|------------------|-----|--------------------------------------------------------------------------|
| LjSGA_020518.0.1 | 155 | (Q8GTR0) Sugar transporter                                               |
| LjSGA_020534.1   | 117 | (Q8H958) Peroxidase 1                                                    |
| LjSGA_020576.1   | 92  | (Q9SLJ4) F20D21.22 protein                                               |
| LjSGA_020611.1   | 135 | (Q9SU88) Hypothetical protein T16L4.100 (Hypothetical protein AT4g29590) |
| LjSGA_020777.1   | 113 | (Q6ZA15) Putative mitochondrial carrier protein                          |
| LjSGA_021301.1   | 73  | (Q2QVE1) Transposon protein, putative, unclassified                      |
| LjSGA_021536.1   | 69  | (Q8L BX6) Hypothetical protein                                           |
| LjSGA_021547.1   | 159 | (Q3LVQ7) TO24-123rc (Fragment)                                           |
| LjSGA_021639.1   | 99  | (Q9ZQI2) Hypothetical protein At2g27370                                  |
| LjSGA_021748.1.1 | 55  | (Q6DMZ6) Cinnamoyl CoA reductase (Fragment)                              |
| LjSGA_021829.1   | 110 | (Q94IA6) CYP90D (Putative cytochrome P450)                               |
| LjSGA_021975.1   | 115 | (Q2HSK0) Transcriptional factor B3                                       |
| LjSGA_021983.1   | 228 | (Q8LAM5) Protein disulfide isomerase-like                                |
| LjSGA_021991.1   | 113 | (Q8H241) Hypothetical protein                                            |
| LjSGA_022138.1   | 223 | (Q8VYX4) Sucrose transporter SUC1                                        |
| LjSGA_022221.2   | 82  | (Q8RXG9) Hypothetical protein At4g33565/T16L1.1                          |
| LjSGA_022494.1   | 87  | unknown protein                                                          |
| LjSGA_022704.3   | 113 | (Q9SL64) Hypothetical protein At2g20170                                  |
| LjSGA_022784.1   | 218 | (Q8L7C2) Hypothetical protein At3g01370                                  |
| LjSGA_022879.1   | 120 | (Q6NLF7) At1g62790                                                       |
| LjSGA_023299.1   | 117 | (O23207) Minor allergen                                                  |
| LjSGA_023592.2   | 73  | (Q765H9) TATA box-binding protein associated factor 10                   |
| LjSGA_023901.2   | 152 | (Q84UT8) Flavonol synthase                                               |
| LjSGA_024000.1   | 53  | (Q676Y2) Hypothetical protein (Fragment)                                 |

|                  |     |                                                                                                                       |
|------------------|-----|-----------------------------------------------------------------------------------------------------------------------|
| LjSGA_024007.1   | 98  | (Q5CCP6) Beta-D-galactosidase (EC 3.2.1.23)                                                                           |
| LjSGA_024344.1.1 | 105 | (Q3EAL1) Protein At3g52525                                                                                            |
| LjSGA_024353.1   | 128 | (Q94AT1) Hypothetical protein At5g53140 (Putative phosphatase 2C)                                                     |
| LjSGA_024617.1   | 248 | (Q2R8W7) Leucine Rich Repeat, putative                                                                                |
| LjSGA_024674.1   | 102 | (Q9XIG1) Putative UDP-glucose:sterol glucosyltransferase (At1g43620)                                                  |
| LjSGA_024678.1   | 212 | (O22952) Putative SF16 protein (Helianthus annuus)                                                                    |
| LjSGA_024820.1   | 262 | (Q4L0F8) Protein phosphatase 2c                                                                                       |
| LjSGA_024873.1   | 85  | (Q9FR37) Amidase (At1g08980/F7G19_15)                                                                                 |
| LjSGA_025115.1   | 225 | (Q9XGZ4) T1N24.4 protein                                                                                              |
| LjSGA_025170.2   | 44  | (Q9SCS2) CDPK-related protein kinase                                                                                  |
| LjSGA_025344.2   | 482 | (Q2KQ28) Resistance protein PLTR (Fragment)                                                                           |
| LjSGA_025640.1   | 532 | (Q2HUZ8) Helicase, C-terminal; Zinc finger, CCHC-type                                                                 |
| LjSGA_025651.1.1 | 75  | (Q9M2N9) Hypothetical protein T10K17.300                                                                              |
| LjSGA_025689.1.1 | 182 | (O23222) MADS-box protein AGL40 (Putative MADS-box protein)                                                           |
| LjSGA_025894.1   | 98  | (Q8VWN6) Raffinose synthase (EC 2.4.1.82)                                                                             |
| LjSGA_025910.2   | 161 | (Q68GS0) SKP1                                                                                                         |
| LjSGA_026078.1   | 105 | (Q9FVV1) Putative GDSL-motif lipase/acylhydrolase; 82739-81282 (Putative GDSL-motif lipase/acylhydrolase) (At1g71250) |
| LjSGA_026433.2   | 112 | (O82023) N7 protein (Fragment)                                                                                        |
| LjSGA_026475.1   | 142 | (Q9LI65) Nodulin-like protein (Hypothetical protein At3g30340/T6J22_10)                                               |
| LjSGA_026712.1   | 61  | (Q501D2) At1g18840                                                                                                    |
| LjSGA_026814.1   | 61  | (Q9LP66) T1N15.20                                                                                                     |
| LjSGA_026849.1   | 77  | (O65152) Putative cinnamyl alcohol dehydrogenase                                                                      |
| LjSGA_026864.1   | 125 | (Q9FI75) Similarity to 5'-nucleotidase                                                                                |
| LjSGA_027445.1   | 153 | (Q6ESR6) Putative anter-specific proline-rich protein APG                                                             |



|                  |     |                                                                                                           |
|------------------|-----|-----------------------------------------------------------------------------------------------------------|
| LjSGA_027478.1.1 | 82  | (Q5Z656) Putative ATPase, aminophospholipid transporter (APLT), class I, type 8A, member 1                |
| LjSGA_027516.1   | 60  | (Q6Z0F0) Putative GEK01                                                                                   |
| LjSGA_027545.2   | 141 | (Q9LP66) T1N15.20                                                                                         |
| LjSGA_027604.1   | 103 | (Q6EP65) Hypothetical protein B1077E10.21 (Hypothetical protein P0638A12.10)                              |
| LjSGA_027781.1   | 116 | (Q9LHW8) Putative esterase                                                                                |
| LjSGA_027812.1.1 | 79  | (Q7XKR2) OSJNBa0053B21.9 protein                                                                          |
| LjSGA_028108.1   | 209 | (Q9AV94) Hypothetical protein                                                                             |
| LjSGA_028144.1   | 133 | (Q9FK75) GDSL-motif lipase/hydrolase-like protein (AT5g45670/MRA19_6)                                     |
| LjSGA_028206.1   | 248 | (Q9FNJ4) Arabidopsis thaliana genomic DNA, chromosome 5, P1 clone:MDJ22                                   |
| LjSGA_028216.1   | 77  | (Q3HLN2) Sucrose-phosphate synthase isoform B (EC 2.4.1.14)                                               |
| LjSGA_028218.2   | 152 | (Q9FQE9) Glutathione S-transferase GST 9 (EC 2.5.1.18)                                                    |
| LjSGA_028767.1   | 95  | (Q2HUN2) TIR; Disease resistance protein                                                                  |
| LjSGA_029016.1   | 113 | (Q9LHL1) Arabidopsis thaliana genomic DNA, chromosome 3, P1 clone: MJH23 (Hypothetical protein At3g13227) |
| LjSGA_029165.1.1 | 80  | (Q9M2S1) Regulator of chromosome condensation-like protein                                                |
| LjSGA_029238.1   | 117 | (Q8S351) Auxin-induced SAUR-like protein                                                                  |
| LjSGA_029271.1   | 68  | (Q5JKB0) Putative replication licensing factor MCM4                                                       |
| LjSGA_029572.0.1 | 50  | (Q9XH70) Hypothetical protein p69RF (Fragment)                                                            |
| LjSGA_029572.2   | 89  | (O80851) Putative dioxygenase                                                                             |
| LjSGA_029582.1   | 68  | (Q6NMB2) Hypothetical protein At5g10320                                                                   |
| LjSGA_029612.1   | 65  | (Q9FG70) GblAAF04433.1                                                                                    |
| LjSGA_029724.1   | 170 | (Q6Z3F5) Putative MYST1                                                                                   |

|                  |     |                                                                                 |
|------------------|-----|---------------------------------------------------------------------------------|
| LjSGA_029886.1   | 187 | (Q6NLE5) At3g01516                                                              |
| LjSGA_029906.1   | 121 | (Q337J6) Expressed protein                                                      |
| LjSGA_030032.2   | 134 | (Q9SA38) F3O9.19 protein (At1g16390/F3O9_19)                                    |
| LjSGA_030056.1   | 257 | (O23360) Hypothetical protein AT4g15060                                         |
| LjSGA_030070.1   | 111 | (Q303Z0) Protein At5g53050                                                      |
| LjSGA_030143.2   | 122 | (Q41251) Calmodulin-binding heat-shock protein                                  |
| LjSGA_030160.1   | 68  | (Q336T9) Flavin-containing monooxygenase, putative                              |
| LjSGA_030203.1   | 153 | (Q2HUD3) Heat shock protein Hsp70                                               |
| LjSGA_030339.1   | 88  | (Q9M2F3) Hypothetical protein F14P22.230                                        |
| LjSGA_030441.1   | 59  | (Q6K9F7) Putative SET domain protein SUVR2                                      |
| LjSGA_030495.0.1 | 48  | (Q56WN0) Endoribonuclease/protein kinase IRE1                                   |
| LjSGA_030680.1   | 149 | (Q6V0J6) Reduced vernalization response 1                                       |
| LjSGA_030719.2   | 87  | (Q8W4Z5) Hypothetical protein f16                                               |
| LjSGA_030798.2   | 140 | (Q84YF4) Hypothetical protein 5                                                 |
| LjSGA_031016.1.1 | 109 | (Q6L3G4) Putative plant disease resistant protein                               |
| LjSGA_031034.1   | 186 | (Q2V4C9) Protein At1g72990                                                      |
| LjSGA_031058.2   | 78  | (O80619) Homeotic protein AGL30                                                 |
| LjSGA_031321.1   | 128 | (Q9SFV9) T1B9.4 protein                                                         |
| LjSGA_031368.1   | 128 | (Q5XEY4) At5g53080                                                              |
| LjSGA_031426.2   | 80  | (Q25AJ5) H0510A06.10 protein                                                    |
| LjSGA_031649.1.1 | 254 | (Q9FGH9) Leucine zipper protein (AT5g58430/mqj2_20)                             |
| LjSGA_031726.2   | 83  | (Q84X66) NBS-LRR type resistance protein (Fragment)                             |
| LjSGA_032158.1.1 | 170 | (Q9LWA5) Putative TFIIIA (Or kruppel)-like zinc finger protein                  |
| LjSGA_032260.1   | 137 | (Q6K4E1) Hypothetical protein OJ1506_A04.22 (Hypothetical protein OJ1001_G09.8) |

|                  |     |                                                                                                                   |
|------------------|-----|-------------------------------------------------------------------------------------------------------------------|
| LjSGA_032392.1   | 113 | (Q71QH1) Cf-4/9 disease resistance-like protein (Fragment)                                                        |
| LjSGA_032481.1   | 83  | (Q2HU26) CCT                                                                                                      |
| LjSGA_032795.2.1 | 71  | (Q93YP7) Polyprenyltransferase like protein (Para-hydroxy bezoate polyprenyl diphosphate transferase) (At4g23660) |
| LjSGA_032906.1   | 83  | (Q8GT20) Benzoyl coenzyme A: benzyl alcohol benzoyl transferase                                                   |
| LjSGA_032985.1   | 73  | (Q647I5) Putative RNA-dependent RNA polymerase SDE1                                                               |
| LjSGA_033075.1   | 134 | (Q9LW22) GblAAD30245.1                                                                                            |
| LjSGA_033145.2   | 77  | (Q677A2) Cold-induced protein (Fragment)                                                                          |
| LjSGA_033178.1   | 105 | (Q8VYW7) AT5g16210/T21H19_130                                                                                     |
| LjSGA_033312.1   | 116 | (Q9FJD9) Similarity to RNaseP protein p30                                                                         |
| LjSGA_033713.1   | 138 | (Q5XWQ0) At3g17900/MEB5_12-like protein                                                                           |
| LjSGA_033789.1   | 55  | (O64489) F20D22.5 protein                                                                                         |
| LjSGA_033846.1   | 125 | (Q42433) S3 self-incompatibility protein precursor                                                                |
| LjSGA_033901.1   | 178 | unknown protein                                                                                                   |
| LjSGA_033923.1   | 375 | (Q2HTR6) RNA-directed DNA polymerase (Reverse transcriptase)                                                      |
| LjSGA_033967.1.1 | 70  | (Q5SNH5) Putative 6-phospho-1-fructokinase                                                                        |
| LjSGA_033972.1   | 162 | (Q9M2Z5) Hypothetical protein T21J18_150 (Hypothetical protein At3g48880)                                         |
| LjSGA_034219.1   | 91  | (Q56I14) TPR-containing protein kinase                                                                            |
| LjSGA_034329.1   | 101 | (Q9C5S3) AtSPO11-1                                                                                                |
| LjSGA_034445.1   | 79  | (Q9SZH4) Putative nucleic acid binding protein                                                                    |
| LjSGA_034560.1   | 135 | (Q9C7X8) Hypothetical protein F13N6.18                                                                            |
| LjSGA_034862.1   | 84  | (Q2V381) Protein At5g13750                                                                                        |
| LjSGA_035237.1   | 71  | (Q9LYF1) Putative potassium transport protein                                                                     |
| LjSGA_035304.1   | 106 | (Q5Z825) Putative avrRpt2-induced AIG2 protein                                                                    |

|                  |     |                                                                                                        |
|------------------|-----|--------------------------------------------------------------------------------------------------------|
| LjSGA_035476.1   | 80  | (Q2HUI4) Cystinosin/ERS1p repeat                                                                       |
| LjSGA_035658.1   | 133 | (Q599T8) Allene-oxide cyclase precursor (EC 5.3.99.6)                                                  |
| LjSGA_035868.1   | 76  | (Q9C650) Peptidylprolyl isomerase, putative                                                            |
| LjSGA_035870.1   | 59  | (Q9SX67) F11A17.11 (At1g48330)                                                                         |
| LjSGA_035880.1.1 | 99  | (Q7XIX3) Hypothetical protein OJ1136_D11.125                                                           |
| LjSGA_036127.1.1 | 99  | (Q9MA41) T20M3.12 protein (Putative class I chitinase) (Chitinase-like protein 1)                      |
| LjSGA_036219.1   | 132 | (Q9ZVN2) T22H22.2 protein (At1g54570) (Hypothetical protein) (Hypothetical protein At1g54570/T22H22_2) |
| LjSGA_036325.1   | 247 | (Q8LEM2) Hypothetical protein                                                                          |
| LjSGA_036392.1.1 | 87  | (Q8LES9) Hypothetical protein                                                                          |
| LjSGA_036522.1   | 112 | (Q6Z390) Hypothetical protein P0417F02.15 (Hypothetical protein P0589E08.34)                           |
| LjSGA_036630.1   | 185 | (Q9FJK3) Similarity to MADS-box DNA-binding protein (MADS-box family protein)                          |
| LjSGA_036811.1   | 145 | (Q9FL05) Similarity to intracellular protein (AT5g40270/MSN9_170)                                      |
| LjSGA_037347.1   | 91  | (O49521) Hypothetical protein F28J12.190 (Hypothetical protein AT4g18530)                              |
| LjSGA_037647.1.1 | 96  | (Q2HUT2) Amino acid/polyamine transporter II                                                           |
| LjSGA_038084.2   | 76  | (Q9M817) Peptide transporter, putative                                                                 |
| LjSGA_038153.1   | 146 | (Q2PJR6) WRKY54                                                                                        |
| LjSGA_038349.1   | 108 | (Q9FKS9) WD-repeat protein-like                                                                        |
| LjSGA_038401.1   | 133 | (Q7XQM5) OSJNBa0089K21.11 protein                                                                      |
| LjSGA_038620.1   | 236 | (O48807) F2401.16 (Hypothetical protein At1g62420/F24O1_44) (Hypothetical protein At1g62425)           |

|                  |     |                                                                          |
|------------------|-----|--------------------------------------------------------------------------|
| LjSGA_038807.2   | 66  | (Q304A8) Protein At4g05520                                               |
| LjSGA_038968.1   | 69  | (Q94IA6) CYP90D (Putative cytochrome P450)                               |
| LjSGA_039082.1   | 117 | (Q9SL64) Hypothetical protein At2g20170                                  |
| LjSGA_039202.2   | 91  | (Q6K861) Putative GDSL-lipase                                            |
| LjSGA_039212.1   | 207 | (Q2YE87) NBS-LRR type disease resistance protein Rps1-k-2                |
| LjSGA_039269.2   | 169 | (Q9FJ30) Similarity to heat shock transcription factor HSF30             |
| LjSGA_039636.1   | 181 | (Q8GT65) Serpin-like protein (Fragment)                                  |
| LjSGA_039685.1   | 143 | (Q9LMI5) T2D23.4 protein                                                 |
| LjSGA_039898.2   | 133 | (Q949G8) HcrVf2 protein                                                  |
| LjSGA_040104.1   | 128 | (Q9FP50) Hypothetical protein P0475H04.20                                |
| LjSGA_040247.1   | 196 | (Q38M54) Rieske iron-sulfur protein-like                                 |
| LjSGA_040307.1   | 44  | (Q2PEY2) Putative long chain acyl-CoA synthetase 9                       |
| LjSGA_040403.1.1 | 135 | (Q9SSM2) Similar to (R)-mandelonitrile lyase isoform 1                   |
| LjSGA_040430.1   | 90  | (Q9SZU6) Hypothetical protein F6G17.110 (Hypothetical protein AT4g37460) |
| LjSGA_040519.2   | 128 | (Q6K963) Putative callose synthase 1 catalytic subunit                   |
| LjSGA_040652.1   | 81  | (Q39820) Hsp22.5                                                         |
| LjSGA_040770.1   | 96  | (Q9ZQ30) Hypothetical protein At2g24370                                  |
| LjSGA_040863.1   | 89  | (Q9FL22) Arabidopsis thaliana genomic DNA, chromosome 5, P1 clone:MPL12  |
| LjSGA_041028.3   | 114 | (Q2HWC9) Hypothetical protein                                            |
| LjSGA_041071.1   | 303 | (Q84ZV0) R 14 protein                                                    |
| LjSGA_041349.1   | 143 | (Q6SZ87) Nucleobase-ascorbate transporter 11                             |
| LjSGA_041622.1   | 198 | (Q9STP5) Hypothetical protein T27E11.50 (Hypothetical protein AT4g27810) |
| LjSGA_041871.1.1 | 73  | (Q9FYD4) Rec-like protein                                                |

|                  |     |                                                                                                                     |
|------------------|-----|---------------------------------------------------------------------------------------------------------------------|
| LjSGA_041878.0.1 | 56  | (Q9M1D6) Hypothetical protein T2O9.50                                                                               |
| LjSGA_042000.1   | 82  | (Q9M1J2) Hypothetical protein F24I3.160 (Hypothetical protein At3g57080/F24I3_160) (Hypothetical protein At3g57080) |
| LjSGA_042231.1   | 69  | (Q2HTR2) Cyclin-like F-box                                                                                          |
| LjSGA_042393.1   | 158 | (O23726) B-Zip DNA binding protein                                                                                  |
| LjSGA_042417.1   | 160 | (Q2HSY3) Nucleic acid-binding, OB-fold                                                                              |
| LjSGA_042493.2.1 | 49  | (Q8LAU7) Hypothetical protein                                                                                       |
| LjSGA_042741.1   | 155 | (Q9LVK5) Arabidopsis thaliana genomic DNA, chromosome 3, P1 clone: MDC16                                            |
| LjSGA_042772.1   | 76  | (Q7XMI1) OSJNBb0004G23.4 protein                                                                                    |
| LjSGA_042990.2   | 128 | (Q2HS79) Cyclin-like F-box; Agenet                                                                                  |
| LjSGA_043060.1   | 68  | (Q9FZ04) Plastid terminal oxidase                                                                                   |
| LjSGA_043183.1   | 129 | (Q8LC04) Hypothetical protein                                                                                       |
| LjSGA_043214.1   | 102 | (Q2KNL3) Alcohol dehydrogenase-like protein                                                                         |
| LjSGA_043231.1   | 314 | (Q2HUI7) Cyclin-like F-box; FBD; Zinc finger, FYVE/PHD-type                                                         |
| LjSGA_043606.0.1 | 90  | (Q9T0J2) Auxin-induced protein-like (At4g38840)                                                                     |
| LjSGA_043640.3   | 133 | (O82491) T12H20.3 protein (Putative transcriptional regulator)                                                      |
| LjSGA_044174.1.1 | 115 | (Q6L459) Hypothetical protein PGEC589.7                                                                             |
| LjSGA_044936.1   | 84  | (Q9ZNX9) Sigma-like factor precursor (RNA polymerase sigma subunit SigE)                                            |
| LjSGA_045035.1   | 186 | (Q43521) Unknown protein                                                                                            |
| LjSGA_045070.1   | 168 | (Q53NG8) Aldehyde dehydrogenase, putative                                                                           |
| LjSGA_045216.1   | 125 | (Q9LP66) T1N15.20                                                                                                   |
| LjSGA_045471.3   | 282 | (Q2HV76) F-box protein interaction domain; Galactose oxidase, central                                               |
| LjSGA_045906.2   | 62  | (Q3E9P8) Protein At4g36860                                                                                          |

|                  |     |                                                                                                          |
|------------------|-----|----------------------------------------------------------------------------------------------------------|
| LjSGA_046038.1   | 202 | (Q9FJJ4) Arabidopsis thaliana genomic DNA, chromosome 5, TAC clone:K19B1                                 |
| LjSGA_046103.1   | 97  | (Q93XZ7) Hypothetical protein At5g42570; K16E1.4 (At5g42570)                                             |
| LjSGA_046214.1   | 95  | (Q4PSB2) Hypothetical protein                                                                            |
| LjSGA_046400.1.1 | 107 | (Q2L8Z5) RNA polymerase beta' subunit                                                                    |
| LjSGA_046630.2   | 257 | (Q6L3S8) Putative F-Box protein                                                                          |
| LjSGA_046820.1   | 80  | (Q2PES5) Hypothetical protein                                                                            |
| LjSGA_046898.1.1 | 93  | (Q75I70) Putative sesquiterpene synthase                                                                 |
| LjSGA_047329.1   | 231 | (Q9LJF8) Arabidopsis thaliana genomic DNA, chromosome 3, P1 clone: MQP17                                 |
| LjSGA_047358.1   | 82  | (Q6X0N8) Putative spermine/spermidine synthase                                                           |
| LjSGA_047416.1   | 203 | (Q9C5I9) Putative lipase                                                                                 |
| LjSGA_047781.1   | 103 | (Q56YR0) Hypothetical protein At4g01290                                                                  |
| LjSGA_048117.0.1 | 95  | (Q9FM77) Arabidopsis thaliana genomic DNA, chromosome 5, P1 clone:MDF20 (Hypothetical protein At5g55610) |
| LjSGA_048252.1   | 168 | (Q3E936) Protein At5g26230                                                                               |
| LjSGA_048703.1   | 71  | (Q677F2) Ribosomal protein L19                                                                           |
| LjSGA_048736.1   | 97  | (O22633) NOI protein, nitrate-induced (Putative nitrate-induced NOI protein)                             |
| LjSGA_048814.1   | 260 | (Q9ZW94) F5A8.4 protein                                                                                  |
| LjSGA_049059.1   | 154 | (Q3E9S8) Protein At4g32330                                                                               |
| LjSGA_050024.1   | 108 | (Q9C7D6) Serine carboxypeptidase, putative; 18637-16038 (At3g12203)                                      |
| LjSGA_050059.1   | 111 | (O23269) Hypothetical protein dl3085w (Hypothetical protein AT4g14090)                                   |
| LjSGA_050115.1.1 | 106 | (Q6K6G8) Putative Importin 7<Ran-binding protein 7                                                       |
| LjSGA_050213.1   | 173 | (O81731) Hypothetical protein F16G20.50 (Hypothetical protein AT4g23350)                                 |
| LjSGA_050544.1   | 132 | (Q8GTG4) WRKY transcription factor IId-2 (Fragment)                                                      |

|                  |     |                                                                                        |
|------------------|-----|----------------------------------------------------------------------------------------|
| LjSGA_050616.1   | 86  | (Q8LG03) Hypothetical protein                                                          |
| LjSGA_051239.1   | 175 | (Q93YF1) Nucleic acid binding protein                                                  |
| LjSGA_051266.1   | 137 | (Q8L9R6) Hypothetical protein (At1g68680)                                              |
| LjSGA_051377.2   | 346 | (Q53K97) Retrotransposon protein, putative, unclassified                               |
| LjSGA_051656.1   | 201 | (Q9FJY3) Photoreceptor-interacting protein-like                                        |
| LjSGA_051999.1   | 60  | (O65023) Hypothetical protein                                                          |
| LjSGA_052124.1   | 113 | (Q25AD4) H0201G08.9 protein                                                            |
| LjSGA_052190.1   | 259 | (Q6ZD72) Hypothetical protein P0450B04.17                                              |
| LjSGA_052243.1   | 72  | (P93157) Annexin (Fragment)                                                            |
| LjSGA_052254.2   | 104 | (Q9SR02) F7O18.23 protein (SWP1) (Struwelpeter 1 protein)                              |
| LjSGA_053143.1   | 107 | (Q8LFE2) Photosystem II                                                                |
| LjSGA_053245.1   | 192 | (Q6L4X7) Hypothetical protein OSJNBb0108E17.2                                          |
| LjSGA_053455.1.1 | 122 | (Q6DXS9) Predicted protein                                                             |
| LjSGA_053489.1   | 84  | (Q67VB0) Hypothetical protein OSJNBa0068B06.28 (Hypothetical protein OSJNBa0052G07.19) |
| LjSGA_053648.2   | 337 | (Q2HWB4) Cyclin-like F-box; F-box protein interaction domain                           |
| LjSGA_053831.1   | 92  | (Q3E9Q4) Protein At4g35987                                                             |
| LjSGA_053890.1   | 114 | (Q84YP6) F-box protein-like protein                                                    |
| LjSGA_053986.1   | 108 | (Q93X19) Urease (EC 3.5.1.5)                                                           |
| LjSGA_054078.1   | 73  | (Q64EX4) MtN19-like protein                                                            |
| LjSGA_054328.1.1 | 91  | (Q6NPR7) At1g29470                                                                     |
| LjSGA_054339.2   | 153 | (Q9AVC0) Chalcone synthase (EC 2.3.1.74)                                               |
| LjSGA_054553.2   | 89  | (Q9ZPH9) F15P23.1 protein (Hypothetical protein AT4g00750)                             |
| LjSGA_054994.1   | 120 | (Q9LLZ7) Phycocyanin homolog                                                           |
| LjSGA_055018.1   | 216 | (Q9M9R5) F14L17.26 protein                                                             |



**Supplemental Table 15.** List of the *L. japonicus* genes without a counterpart in the databases.

| gene name            | product size (aa) | Status | Description                                                                           |
|----------------------|-------------------|--------|---------------------------------------------------------------------------------------|
| chr2.CM0225.90.nc    | 53                | comp.  | (Q6W2J4) VDAC1.2 - Lotus japonicus                                                    |
| LjSGA_039975.1       | 51                | comp.  | (Q53UK3) Ser/Thr protein kinase                                                       |
| LjSGA_043445.1       | 66                | comp.  | (Q53VE2) Ser/Thr protein kinase                                                       |
| LjSGA_091697.1       | 53                | comp.  | (Q40209) RAB5A                                                                        |
| chr1.CM0033.550.nc   | 89                | comp.  | (Q1T2J3) DNA binding protein S1FA - Medicago truncatula (Barrel medic)                |
| chr1.CM0064.450.nc   | 186               | comp.  | (Q1S3X4) Ribonuclease H - Medicago truncatula (Barrel medic)                          |
| chr1.CM0098.30.nd    | 77                | comp.  | (Q2HW84) Cyclin-like F-box - Medicago truncatula (Barrel medic)                       |
| chr1.CM0105.700.nc   | 146               | comp.  | (Q1SL48) Zinc finger, GRF-type - Medicago truncatula (Barrel medic)                   |
| chr1.CM0109.340.nc   | 189               | comp.  | (Q1SFZ0) At5g27860 (Vitellogenin, related) - Medicago truncatula (Barrel medic)       |
| chr1.CM0125.60.nc    | 509               | comp.  | (Q2HUI3) Hypothetical protein - Medicago truncatula (Barrel medic)                    |
| chr1.CM0171.670.nd   | 64                | comp.  | (Q1SKE5) Short-chain dehydrogenase/reductase SDR - Medicago truncatula (Barrel medic) |
| chr1.CM0233.120.nc   | 248               | comp.  | (Q1SR58) Hypothetical protein - Medicago truncatula (Barrel medic)                    |
| chr1.CM0233.460.nc   | 215               | comp.  | (Q1SU18) Hypothetical protein - Medicago truncatula (Barrel medic)                    |
| chr1.CM0295.510.nd   | 137               | comp.  | (Q1RW20) Plant self-incompatibility S1 - Medicago truncatula (Barrel medic)           |
| chr1.CM0433.190.nd   | 151               | comp.  | (Q1SXA3) IMP dehydrogenase/GMP reductase - Medicago truncatula (Barrel medic)         |
| chr1.CM1956.100.nd   | 146               | comp.  | (Q1SL48) Zinc finger, GRF-type - Medicago truncatula (Barrel medic)                   |
| chr1.LjT41J07.10.nd  | 256               | comp.  | (Q1SB14) Protein kinase - Medicago truncatula (Barrel medic)                          |
| chr1.LjT43O05.100.nd | 171               | comp.  | (Q1S1M9) Hypothetical protein - Medicago truncatula (Barrel medic)                    |
| chr1.LjT43O05.140.nd | 136               | comp.  | (Q4A185) Beclin 1 protein - Medicago truncatula (Barrel medic)                        |
| chr2.CM0058.60.nc    | 457               | comp.  | (Q1SZ19) Hypothetical protein - Medicago truncatula (Barrel medic)                    |
| chr2.CM0102.380.nc   | 278               | comp.  | (Q1SUL5) IMP dehydrogenase/GMP reductase - Medicago truncatula (Barrel medic)         |

|                    |     |       |                                                                                                                                                               |
|--------------------|-----|-------|---------------------------------------------------------------------------------------------------------------------------------------------------------------|
| chr2.CM0120.340.nc | 142 | comp. | (Q1SCP0) RNA-binding region RNP-1 (RNA recognition motif) - Medicago truncatula (Barrel medic)                                                                |
| chr2.CM0124.510.nc | 121 | comp. | (Q1SCR3) Pre-mRNA cleavage complex II Clp1 - Medicago truncatula (Barrel medic)                                                                               |
| chr2.CM0153.110.nc | 412 | comp. | (Q1SCA3) Hypothetical protein - Medicago truncatula (Barrel medic)                                                                                            |
| chr2.CM0153.140.nc | 405 | comp. | (Q1SCA0) Hypothetical protein - Medicago truncatula (Barrel medic)                                                                                            |
| chr2.CM0177.590.nc | 209 | comp. | (Q1S546) Hypothetical protein - Medicago truncatula (Barrel medic)                                                                                            |
| chr2.CM0201.250.nc | 321 | comp. | (Q1SCA3) Hypothetical protein - Medicago truncatula (Barrel medic)                                                                                            |
| chr2.CM0201.70.nd  | 384 | comp. | (Q1SCA3) Hypothetical protein - Medicago truncatula (Barrel medic)                                                                                            |
| chr2.CM0210.40.nc  | 101 | comp. | (Q1S948) PGPS/D10 - Medicago truncatula (Barrel medic)                                                                                                        |
| chr2.CM0272.460.nd | 182 | comp. | (Q1SI76) Cyclin-like F-box; F-box protein interaction domain (F-box associated, putative) - Medicago truncatula (Barrel medic)                                |
| chr2.CM0308.250.nc | 101 | comp. | (Q1S704) Hypothetical protein - Medicago truncatula (Barrel medic)                                                                                            |
| chr2.CM0338.240.nd | 86  | comp. | (Q1SR15) Zinc finger, RING-type; RINGv - Medicago truncatula (Barrel medic)                                                                                   |
| chr2.CM0749.290.nd | 99  | comp. | (Q1SBE2) Hypothetical protein - Medicago truncatula (Barrel medic)                                                                                            |
| chr3.CM0091.100.nc | 267 | comp. | (Q1RYG0) Zinc finger, CCHC-type; Plant MuDR transposase; Zinc finger, SWIM-type - Medicago truncatula (Barrel medic)                                          |
| chr3.CM0091.250.nc | 105 | comp. | (Q1SI76) Cyclin-like F-box; F-box protein interaction domain (F-box associated, putative) - Medicago truncatula (Barrel medic)                                |
| chr3.CM0091.610.nd | 88  | comp. | (Q1S9F6) Hypothetical protein - Medicago truncatula (Barrel medic)                                                                                            |
| chr3.CM0110.90.nc  | 844 | comp. | (Q1RXG8) IMP dehydrogenase/GMP reductase - Medicago truncatula (Barrel medic)                                                                                 |
| chr3.CM0135.210.nd | 60  | comp. | (Q1RSQ6) Metal-dependent phosphohydrolase, HD region (Metal-dependent phosphohydrolase, HD region; Putative DNA binding) - Medicago truncatula (Barrel medic) |
| chr3.CM0216.400.nc | 92  | comp. | (Q1SSK7) Peptidase C14, caspase catalytic subunit p20 - Medicago truncatula (Barrel medic)                                                                    |
| chr3.CM0261.290.nc | 155 | comp. | (Q5UBY0) Wound-inducible putative cytosolic terpene synthase 1 - Medicago truncatula (Barrel medic)                                                           |

|                      |     |       |                                                                                                                                  |
|----------------------|-----|-------|----------------------------------------------------------------------------------------------------------------------------------|
| chr3.CM0634.380.nd   | 84  | comp. | (Q1STP0) Serine/threonine-specific protein phosphatase and bis(5-nucleosyl)-tetrphosphatase - Medicago truncatula (Barrel medic) |
| chr3.CM0711.470.nd   | 75  | comp. | (Q1SAL1) Protein phosphatase 2C-like - Medicago truncatula (Barrel medic)                                                        |
| chr3.LjT29G18.130.nd | 137 | comp. | (Q1SYS3) Hypothetical protein - Medicago truncatula (Barrel medic)                                                               |
| chr3.LjT36L08.50.nc  | 137 | comp. | (Q1RVQ7) Hypothetical protein - Medicago truncatula (Barrel medic)                                                               |
| chr4.CM0007.1340.nd  | 435 | comp. | (Q1S4X3) IMP dehydrogenase/GMP reductase - Medicago truncatula (Barrel medic)                                                    |
| chr4.CM0007.220.nd   | 203 | comp. | (Q2MJ18) Cytochrome P450 monooxygenase CYP72A59 - Medicago truncatula (Barrel medic)                                             |
| chr4.CM0170.260.nc   | 55  | comp. | (Q1SL61) Mov34-1; Flagellar motor switch protein FliG-like - Medicago truncatula (Barrel medic)                                  |
| chr4.CM0173.100.nd   | 118 | comp. | (Q1SNK5) Hypothetical protein - Medicago truncatula (Barrel medic)                                                               |
| chr4.CM0421.230.nd   | 100 | comp. | (Q1T1H3) Cadmium-transporting ATPase; ATPase, E1-E2 type - Medicago truncatula (Barrel medic)                                    |
| chr5.CM0096.90.nc    | 671 | comp. | (Q1SJ05) Hypothetical protein - Medicago truncatula (Barrel medic)                                                               |
| chr5.CM0569.330.nc   | 656 | comp. | (Q1SJ05) Hypothetical protein - Medicago truncatula (Barrel medic)                                                               |
| chr6.CM0055.1090.nd  | 78  | comp. | (Q2HVA4) Centromere protein, putative - Medicago truncatula (Barrel medic)                                                       |
| chr6.CM0066.340.nc   | 378 | comp. | (Q1SCA0) Hypothetical protein - Medicago truncatula (Barrel medic)                                                               |
| chr6.CM0137.190.nc   | 769 | comp. | (A2Q4W6) RNA-binding region RNP-1 (RNA recognition motif) - Medicago truncatula (Barrel medic)                                   |
| chr6.CM1514.40.nc    | 109 | comp. | (O24101) MtN5 protein precursor - Medicago truncatula (Barrel medic)                                                             |
| CM0319.120.nd        | 71  | comp. | (Q1T065) Cyclin-like F-box - Medicago truncatula (Barrel medic)                                                                  |
| LjB03P03.280.nd      | 131 | comp. | (Q1T670) Nitrate-induced NOI - Medicago truncatula (Barrel medic)                                                                |
| LjB18O14.10.nd       | 85  | comp. | (Q1SRL4) Hypothetical protein - Medicago truncatula (Barrel medic)                                                               |
| LjT01F21.100.nc      | 101 | comp. | (Q1S9F6) Hypothetical protein - Medicago truncatula (Barrel medic)                                                               |
| LjT07J01.170.nd      | 90  | comp. | (Q93YX8) Phosphoinositide-specific phospholipase C (PLC) - Medicago truncatula (Barrel medic)                                    |

|                  |     |       |                                                                                                                   |
|------------------|-----|-------|-------------------------------------------------------------------------------------------------------------------|
| LjT10B22.70.nd   | 105 | comp. | (Q1SKK1) Cellular retinaldehyde-binding/triple function, N-terminal - Medicago truncatula (Barrel medic)          |
| LjT11A15.20.nc   | 145 | comp. | (Q1SX51) Hypothetical protein - Medicago truncatula (Barrel medic)                                                |
| LjT13L03.120.nd  | 85  | comp. | (Q1S019) Plant lipid transfer/seed storage/trypsin-alpha amylase inhibitor - Medicago truncatula (Barrel medic)   |
| LjT22M20.110.nd  | 74  | comp. | (Q1T3U5) Haem peroxidase, plant/fungal/bacterial - Medicago truncatula (Barrel medic)                             |
| LjT28O03.30.nd   | 101 | comp. | (Q1S9F6) Hypothetical protein - Medicago truncatula (Barrel medic)                                                |
| LjT31F05.20.nd   | 501 | comp. | (Q1SUL5) IMP dehydrogenase/GMP reductase - Medicago truncatula (Barrel medic)                                     |
| LjT31J09.130.nd  | 146 | comp. | (Q1SL48) Zinc finger, GRF-type - Medicago truncatula (Barrel medic)                                               |
| LjT34F04.140.nd  | 110 | comp. | (Q1SZY7) Hypothetical protein - Medicago truncatula (Barrel medic)                                                |
| LjT34L13.40.nd   | 104 | comp. | (Q1S492) TIR - Medicago truncatula (Barrel medic)                                                                 |
| LjT34L14.110.nc  | 137 | comp. | (Q1S796) Plant self-incompatibility S1 - Medicago truncatula (Barrel medic)                                       |
| LjT35J12.250.nd  | 108 | comp. | (Q1RYG7) Plant lipid transfer protein/Par allergen - Medicago truncatula (Barrel medic)                           |
| LjT37D10.210.nd  | 55  | comp. | (Q1RVK3) Hypothetical protein - Medicago truncatula (Barrel medic)                                                |
| LjT42G13.130.nd  | 231 | comp. | (Q1SVM0) Cyclin-like F-box - Medicago truncatula (Barrel medic)                                                   |
| LjT42G13.30.nd   | 270 | comp. | (Q1RT02) Cyclin-like F-box - Medicago truncatula (Barrel medic)                                                   |
| LjSGA_013309.2   | 82  | comp. | (Q8GSM9) Squalene monooxygenase 2 (EC 1.14.99.7)                                                                  |
| LjSGA_015717.1   | 92  | comp. | (Q2HTV0) Zinc finger, RING-type; Transcription factor jumonji, jmjC; Zinc finger, C2H2-type                       |
| LjSGA_016981.1.1 | 579 | comp. | (Q2HVW1) Hypothetical protein                                                                                     |
| LjSGA_027876.1   | 97  | comp. | (Q2HSY3) Nucleic acid-binding, OB-fold                                                                            |
| LjSGA_033871.1   | 79  | comp. | (Q2HS79) Cyclin-like F-box; Agenet                                                                                |
| LjSGA_035275.2   | 127 | comp. | (Q2HV12) Plant lipid transfer/seed storage/trypsin-alpha amylase inhibitor; Pistil-specific extensin-like protein |
| LjSGA_036568.1   | 162 | comp. | (Q2HW14) Zinc finger, CCCH-type; Sugar transporter superfamily                                                    |
| LjSGA_048115.1   | 107 | comp. | (Q8W0Y5) Enod8.1                                                                                                  |
| LjSGA_061912.1   | 101 | comp. | (Q2MJ18) Cytochrome P450 monooxygenase CYP72B                                                                     |

|                      |     |       |                                                                                      |
|----------------------|-----|-------|--------------------------------------------------------------------------------------|
| LjSGA_068378.1       | 103 | comp. | (Q2HUI7) Cyclin-like F-box; FBD; Zinc finger, FYVE/PHD-type                          |
| LjSGA_084113.1       | 88  | comp. | (Q2MGR5) Glycoside hydrolase, family 28                                              |
| LjSGA_100408.2       | 136 | comp. | (Q4A185) Beclin 1 protein                                                            |
| LjSGA_119111.2       | 83  | comp. | (Q8W0V0) Type IIB calcium ATPase                                                     |
| LjSGA_122476.1       | 55  | comp. | (Q4A185) Beclin 1 protein                                                            |
| LjSGA_136168.1.1     | 136 | comp. | (Q4A185) Beclin 1 protein                                                            |
| chr3.CM0711.70.nd    | 91  | comp. | (Q9SBR5) Putative wound-induced protein - <i>Medicago varia</i> (Alfalfa)            |
| LjSGA_052423.1       | 105 | comp. | (Q9SBR5) Putative wound-induced protein                                              |
| chr5.CM0278.300.nc   | 77  | comp. | (Q41012) Endo-1,4-beta-glucanase precursor - <i>Pisum sativum</i> (Garden pea)       |
| LjSGA_108514.1       | 49  | comp. | (Q76JT3) RelA-SpoT like protein PsRSH1                                               |
| LjSGA_117613.1       | 49  | comp. | (Q76JT3) RelA-SpoT like protein PsRSH1                                               |
| chr5.LjT08O17.180.nd | 117 | comp. | (Q2PEF7) Pseudo-response regulator 37 homologue - <i>Lemna paucicostata</i>          |
| chr1.LjT08C17.50.nc  | 508 | comp. | (Q35138) Hypothetical protein - <i>Bradyrhizobium</i> sp. BTAi1                      |
| chr6.CM0055.1110.nd  | 118 | comp. | (A0U939) Hypothetical protein precursor - <i>Burkholderia cenocepacia</i> MC0-3      |
| chr6.CM0055.960.nc   | 118 | comp. | (A0U939) Hypothetical protein precursor - <i>Burkholderia cenocepacia</i> MC0-3      |
| LjSGA_026701.2       | 44  | comp. | (Q84KS9) RelA homolog                                                                |
| LjSGA_042273.2       | 47  | comp. | (Q95FJ6) ATP synthase beta subunit                                                   |
| LjSGA_040712.1       | 70  | comp. | (Q9AVC0) Chalcone synthase (EC 2.3.1.74)                                             |
| chr1.CM0496.320.nd   | 112 | comp. | (Q6EMA7) Ribosomal protein S7 - <i>Mahonia aquifolium</i>                            |
| chr1.CM0275.130.nd   | 162 | comp. | (A1Y2K6) VS-B (Fragment) - <i>Vasconcellea stipulata</i>                             |
| chr5.CM0911.160.nd   | 251 | comp. | (Q5ICP0) RING-H2 subgroup RHE protein - <i>Populus tremula</i> x <i>Populus alba</i> |
| LjSGA_053007.1       | 78  | comp. | (Q8H255) Myb-like transcription factor 6                                             |
| chr1.CM0123.300.nc   | 341 | comp. | (Q7Q1K5) ENSANGP00000010223 (Fragment) - <i>Anopheles gambiae</i> str. PEST          |
| LjSGA_019745.1       | 233 | comp. | (Q7Q1K5) ENSANGP00000010223 (Fragment)                                               |

|                      |     |       |                                                                                                                                                                   |
|----------------------|-----|-------|-------------------------------------------------------------------------------------------------------------------------------------------------------------------|
| chr1.CM0001.300.nd   | 93  | comp. | (Q9LZS7) Hypothetical protein F17C15_30 (Putative lipase/acylhydrolase) (Hypothetical protein At5g03610) - Arabidopsis thaliana (Mouse-ear cress)                 |
| chr1.CM0033.1150.nc  | 107 | comp. | (Q8S8L5) Expressed protein (Auxin-responsive family protein) - Arabidopsis thaliana (Mouse-ear cress)                                                             |
| chr1.CM0033.320.nc   | 149 | comp. | (Q9LVU8) GblAAF27101.1 - Arabidopsis thaliana (Mouse-ear cress)                                                                                                   |
| chr1.CM0174.40.nd    | 92  | comp. | (Q5XF07) At3g48425 - Arabidopsis thaliana (Mouse-ear cress)                                                                                                       |
| chr1.CM0206.40.nd    | 114 | comp. | (Q5XVC1) Hypothetical protein - Arabidopsis thaliana (Mouse-ear cress)                                                                                            |
| chr1.CM0231.290.nc   | 189 | comp. | (Q9M1L9) Hypothetical protein F18P9_20 (Hypothetical protein At3g42860) - Arabidopsis thaliana (Mouse-ear cress)                                                  |
| chr1.CM0231.460.nd   | 108 | comp. | (Q9LDF5) 3-hydroxybutyryl-CoA dehydrogenase-like protein - Arabidopsis thaliana (Mouse-ear cress)                                                                 |
| chr1.CM0233.410.nc   | 221 | comp. | (Q9LJ70) GblAAC72857.1 - Arabidopsis thaliana (Mouse-ear cress)                                                                                                   |
| chr1.CM0295.140.nd   | 133 | comp. | (Q9LTC6) Similarity to ethylene response element binding protein EREBP (AP2/EREBP transcription factor) - Arabidopsis thaliana (Mouse-ear cress)                  |
| chr1.CM0295.770.nc   | 167 | comp. | (Q9FNC0) GblAAD10670.1 (Hypothetical protein) (Hypothetical protein At5g44060) (Hypothetical protein At5g44060/MRH10_17) - Arabidopsis thaliana (Mouse-ear cress) |
| chr1.CM0361.250.nd   | 149 | comp. | (Q9M9U9) F6A14.11 protein - Arabidopsis thaliana (Mouse-ear cress)                                                                                                |
| chr1.CM0393.130.nd   | 78  | comp. | (Q9SRY1) F22D16.12 protein (Thiamin pyrophosphokinase, putative) - Arabidopsis thaliana (Mouse-ear cress)                                                         |
| chr1.CM0593.430.nd   | 184 | comp. | (Q9FFY2) EmblCAB86673.1 - Arabidopsis thaliana (Mouse-ear cress)                                                                                                  |
| chr1.LjT01D01.160.nd | 85  | comp. | (Q9M011) Light-inducible protein ATLS1 - Arabidopsis thaliana (Mouse-ear cress)                                                                                   |
| chr1.LjT01D01.70.nd  | 73  | comp. | (Q9M010) Hypothetical protein F7A7_180 - Arabidopsis thaliana (Mouse-ear cress)                                                                                   |
| chr1.LjT06I14.20.nc  | 106 | comp. | (O22128) Expressed protein (At2g45450) (Hypothetical protein) - Arabidopsis thaliana (Mouse-ear cress)                                                            |
| chr1.LjT43L07.60.nd  | 102 | comp. | (Q94A79) AT3g49250/F2K15_110 - Arabidopsis thaliana (Mouse-ear cress)                                                                                             |
| chr1.LjT46N10.20.nd  | 111 | comp. | (Q9SFU9) T1B9.14 protein (At3g07190) - Arabidopsis thaliana (Mouse-ear cress)                                                                                     |

|                     |     |       |                                                                                                                                                                   |
|---------------------|-----|-------|-------------------------------------------------------------------------------------------------------------------------------------------------------------------|
| chr2.CM0008.670.nc  | 123 | comp. | (Q29Q81) At5g40460 - Arabidopsis thaliana (Mouse-ear cress)                                                                                                       |
| chr2.CM0011.260.nc  | 194 | comp. | (Q9SHT9) Hypothetical protein At2g05350 - Arabidopsis thaliana (Mouse-ear cress)                                                                                  |
| chr2.CM0018.1060.nc | 191 | comp. | (O65499) Putative zinc-finger protein (Zinc finger family protein) - Arabidopsis thaliana (Mouse-ear cress)                                                       |
| chr2.CM0099.240.nd  | 132 | comp. | (Q9SJH0) Expressed protein (Helix-loop-helix protein) (Hypothetical protein At2g42870) (Hypothetical protein) - Arabidopsis thaliana (Mouse-ear cress)            |
| chr2.CM0177.530.nc  | 137 | comp. | (Q9LSK9) Genomic DNA, chromosome 5, TAC clone:K21L13 (Hypothetical protein At5g65660) (At5g65660) (Hypothetical protein) - Arabidopsis thaliana (Mouse-ear cress) |
| chr2.CM0237.340.nc  | 206 | comp. | (O80986) Hypothetical protein At2g26110 (At2g26110) - Arabidopsis thaliana (Mouse-ear cress)                                                                      |
| chr2.CM0249.970.nd  | 98  | comp. | (O23230) Trichohyalin like protein - Arabidopsis thaliana (Mouse-ear cress)                                                                                       |
| chr2.CM0272.110.nd  | 295 | comp. | (O81793) Hypothetical protein F8D20.120 (Hypothetical protein AT4g35610) - Arabidopsis thaliana (Mouse-ear cress)                                                 |
| chr2.CM0338.210.nd  | 100 | comp. | (Q9SIF5) Putative GDSL-motif lipase/hydrolase - Arabidopsis thaliana (Mouse-ear cress)                                                                            |
| chr2.LjT30P12.30.nc | 90  | comp. | (Q8L9P8) RALF (Hypothetical protein At4g15800) (At4g15800) - Arabidopsis thaliana (Mouse-ear cress)                                                               |
| chr3.CM0070.200.nc  | 163 | comp. | (Q8S8L5) Expressed protein (Auxin-responsive family protein) - Arabidopsis thaliana (Mouse-ear cress)                                                             |
| chr3.CM0112.200.nd  | 131 | comp. | (Q7XBI1) Metacaspase 7 (Metacaspase 4) - Arabidopsis thaliana (Mouse-ear cress)                                                                                   |
| chr3.CM0160.190.nc  | 66  | comp. | (Q9M0H9) Hypothetical protein AT4g28290 (At4g28290) - Arabidopsis thaliana (Mouse-ear cress)                                                                      |
| chr3.CM0160.990.nc  | 195 | comp. | (Q8L7Z6) AT3g54680/T5N23_40 - Arabidopsis thaliana (Mouse-ear cress)                                                                                              |
| chr3.CM0164.70.nd   | 102 | comp. | (Q9FNI1) GblAAF02129.1 (Putative B-type cyclin) (Hypothetical protein) - Arabidopsis thaliana (Mouse-ear cress)                                                   |
| chr3.CM0282.950.nc  | 246 | comp. | (Q56YM7) Hypothetical protein - Arabidopsis thaliana (Mouse-ear cress)                                                                                            |
| chr3.CM0423.330.nc  | 274 | comp. | (Q9LS28) Similarity to kinase - Arabidopsis thaliana (Mouse-ear cress)                                                                                            |
| chr3.CM0996.150.nd  | 103 | comp. | (Q9M9V9) Putative translationally controlled tumor protein - Arabidopsis thaliana (Mouse-ear cress)                                                               |

|                      |     |       |                                                                                                                                                             |
|----------------------|-----|-------|-------------------------------------------------------------------------------------------------------------------------------------------------------------|
|                      |     |       | cress)                                                                                                                                                      |
| chr3.LjT02L14.150.nd | 30  | comp. | (Q9SCL3) PRE-MRNA SPLICING FACTOR SF2-like protein - Arabidopsis thaliana (Mouse-ear cress)                                                                 |
| chr3.LjT37F23.70.nd  | 129 | comp. | (O82343) Expressed protein (Hypothetical protein At2g46260) - Arabidopsis thaliana (Mouse-ear cress)                                                        |
| chr3.LjT40N08.110.nd | 316 | comp. | (Q0WT56) ZFP3 zinc finger protein - Arabidopsis thaliana (Mouse-ear cress)                                                                                  |
| chr4.CM0006.670.nd   | 99  | comp. | (Q8VXY7) Hypothetical protein At1g70330 - Arabidopsis thaliana (Mouse-ear cress)                                                                            |
| chr4.CM0025.320.nc   | 114 | comp. | (Q8LC23) Hypothetical protein - Arabidopsis thaliana (Mouse-ear cress)                                                                                      |
| chr4.CM0042.2260.nc  | 148 | comp. | (Q9C923) Putative GTP-binding protein; 106556-109264 - Arabidopsis thaliana (Mouse-ear cress)                                                               |
| chr4.CM0079.80.nd    | 56  | comp. | (Q94B05) Hypothetical protein F1N21.15 (At1g67250) (Hypothetical protein) (Hypothetical protein At1g67250/F1N21_7) - Arabidopsis thaliana (Mouse-ear cress) |
| chr4.CM0288.140.nd   | 123 | comp. | (Q84JS4) Hypothetical protein At5g47740 - Arabidopsis thaliana (Mouse-ear cress)                                                                            |
| chr4.CM0500.150.nd   | 440 | comp. | (Q9C908) Hypothetical protein F1O17.11 - Arabidopsis thaliana (Mouse-ear cress)                                                                             |
| chr4.CM0558.310.nc   | 408 | comp. | (Q9FG24) Receptor-like protein kinase (Strubbelig receptor family 2) - Arabidopsis thaliana (Mouse-ear cress)                                               |
| chr4.CM0558.440.nd   | 119 | comp. | (Q67XD6) Hypothetical protein At2g32500 - Arabidopsis thaliana (Mouse-ear cress)                                                                            |
| chr4.CM1616.340.nc   | 94  | comp. | (Q94K72) Hypothetical protein At1g16170 (Hypothetical protein) - Arabidopsis thaliana (Mouse-ear cress)                                                     |
| chr4.LjT06I07.110.nd | 121 | comp. | (Q9SA55) F10O3.3 protein (Hypothetical protein At1g03140) - Arabidopsis thaliana (Mouse-ear cress)                                                          |
| chr5.CM0096.380.nc   | 223 | comp. | (Q9STX1) Hypothetical protein T22A6.60 (Hypothetical protein At4g24230) - Arabidopsis thaliana (Mouse-ear cress)                                            |
| chr5.CM0200.710.nd   | 111 | comp. | (Q9FPH4) AT4g33900 - Arabidopsis thaliana (Mouse-ear cress)                                                                                                 |
| chr5.CM0200.820.nc   | 112 | comp. | (Q8LEN7) Hypothetical protein (Hypothetical protein At3g19550) - Arabidopsis thaliana (Mouse-ear cress)                                                     |



|                      |     |       |                                                                                                                                                                                      |
|----------------------|-----|-------|--------------------------------------------------------------------------------------------------------------------------------------------------------------------------------------|
| chr5.CM0200.980.nc   | 98  | comp. | (Q3E6W8) Protein At2g15000 (Hypothetical protein At2g15000) - Arabidopsis thaliana (Mouse-ear cress)                                                                                 |
| chr5.CM0211.130.nc   | 505 | comp. | (Q9LSG4) Arabidopsis thaliana genomic DNA, chromosome 3, P1 clone: MJL12 - Arabidopsis thaliana (Mouse-ear cress)                                                                    |
| chr5.CM0239.320.nc   | 112 | comp. | (Q8LCV8) Hypothetical protein - Arabidopsis thaliana (Mouse-ear cress)                                                                                                               |
| chr5.CM0911.140.nd   | 123 | comp. | (Q9FK76) Subtilisin-like protease (Putative subtilisin) - Arabidopsis thaliana (Mouse-ear cress)                                                                                     |
| chr5.CM1125.670.nd   | 79  | comp. | (Q9SY09) Small nuclear riboprotein Sm-D1 (At4g02840) - Arabidopsis thaliana (Mouse-ear cress)                                                                                        |
| chr5.CM1813.200.nc   | 198 | comp. | (Q94BS1) Hypothetical protein At3g21290 - Arabidopsis thaliana (Mouse-ear cress)                                                                                                     |
| chr5.LjT10N02.110.nd | 189 | comp. | (Q9M2P8) Hypothetical protein T10K17.210 - Arabidopsis thaliana (Mouse-ear cress)                                                                                                    |
| chr5.LjT32I14.270.nd | 56  | comp. | (Q9T0K6) Hypothetical protein AT4g13350 - Arabidopsis thaliana (Mouse-ear cress)                                                                                                     |
| chr6.CM0037.1150.nc  | 181 | comp. | (O04248) Hypothetical protein T10M13.5 (At4g02040) (Hypothetical protein AT4g02040) - Arabidopsis thaliana (Mouse-ear cress)                                                         |
| chr6.CM0037.860.nc   | 214 | comp. | (Q9LZW0) Putative zinc finger protein - Arabidopsis thaliana (Mouse-ear cress)                                                                                                       |
| chr6.CM0137.220.nc   | 186 | comp. | (Q9C7Y8) Hypothetical protein T2J15.13 (At1g47960/T2J15_13) (Hypothetical protein) - Arabidopsis thaliana (Mouse-ear cress)                                                          |
| chr6.LjT18B08.90.nd  | 135 | comp. | (Q94CB6) Hypothetical protein At3g47070 - Arabidopsis thaliana (Mouse-ear cress)                                                                                                     |
| CM0584.180.nd        | 68  | comp. | (Q93Z49) AT5g64130/MHJ24_11 (Hypothetical protein) - Arabidopsis thaliana (Mouse-ear cress)                                                                                          |
| CM0601.240.nd        | 103 | comp. | (Q9FIX3) GblAAD30619.1 - Arabidopsis thaliana (Mouse-ear cress)                                                                                                                      |
| LjB10M19.30.nd       | 55  | comp. | (Q9LYG2) Hypothetical protein T22P22_70 (Hypothetical protein At5g11680) (Hypothetical protein) (Hypothetical protein At5g11680; T22P22_70) - Arabidopsis thaliana (Mouse-ear cress) |
| LjT03L21.100.nd      | 142 | comp. | (Q9SK37) Hypothetical protein At2g24960 - Arabidopsis thaliana (Mouse-ear cress)                                                                                                     |
| LjT09I09.130.nd      | 49  | comp. | (Q9LDY7) Hypothetical protein AT4g11410 - Arabidopsis thaliana (Mouse-ear cress)                                                                                                     |
| LjT13N04.20.nd       | 80  | comp. | (Q9LT14) Genomic DNA, chromosome 3, P1 clone: MPN9 - Arabidopsis thaliana (Mouse-ear cress)                                                                                          |

|                  |     |       |                                                                                                                                                                                     |
|------------------|-----|-------|-------------------------------------------------------------------------------------------------------------------------------------------------------------------------------------|
| LjT27E22.120.nd  | 107 | comp. | (Q94AT2) Hypothetical protein At5g58570 (Hypothetical protein) - Arabidopsis thaliana (Mouse-ear cress)                                                                             |
| LjT30N18.310.nd  | 101 | comp. | (Q9SJD5) Expressed protein (At2g04340) (Hypothetical protein At2g04340) - Arabidopsis thaliana (Mouse-ear cress)                                                                    |
| LjT31F05.40.nd   | 136 | comp. | (Q9SYM4) Trehalose-6-phosphate synthase - Arabidopsis thaliana (Mouse-ear cress)                                                                                                    |
| LjT31N05.40.nd   | 69  | comp. | (Q9LRR8) Arabidopsis thaliana genomic DNA, chromosome 3, P1 clone:MOA2 (Hypothetical protein At3g14430) (At3g14430) (Hypothetical protein) - Arabidopsis thaliana (Mouse-ear cress) |
| LjT32E09.180.nd  | 82  | comp. | (Q9SN67) Hypothetical protein F25I24.20 (Hypothetical protein At4g10810) (Hypothetical protein) - Arabidopsis thaliana (Mouse-ear cress)                                            |
| LjT35J12.200.nd  | 114 | comp. | (A3KPG0) At4g10380 - Arabidopsis thaliana (Mouse-ear cress)                                                                                                                         |
| LjT37D10.220.nd  | 99  | comp. | (Q2V2X9) Protein At5g56610 - Arabidopsis thaliana (Mouse-ear cress)                                                                                                                 |
| LjT38E08.190.nd  | 71  | comp. | (Q4V3C1) At2g03070 (Hypothetical protein At2g03070) - Arabidopsis thaliana (Mouse-ear cress)                                                                                        |
| LjT40E15.90.nc   | 503 | comp. | (Q9LPP9) F15H18.21 - Arabidopsis thaliana (Mouse-ear cress)                                                                                                                         |
| LjT40J14.20.nc   | 189 | comp. | (Q9FMY7) Genomic DNA, chromosome 5, P1 clone:MJB21 (Hypothetical protein At5g42780) - Arabidopsis thaliana (Mouse-ear cress)                                                        |
| LjT42G13.70.nd   | 447 | comp. | (Q08AA0) At3g52680 - Arabidopsis thaliana (Mouse-ear cress)                                                                                                                         |
| LjT45M09.30.nd   | 67  | comp. | (A0JPT0) At1g80830 - Arabidopsis thaliana (Mouse-ear cress)                                                                                                                         |
| LjT45M09.70.nd   | 80  | comp. | (Q8GXZ7) Hypothetical protein (At1g52821) - Arabidopsis thaliana (Mouse-ear cress)                                                                                                  |
| LjT46I09.150.nd  | 78  | comp. | (Q9M9T3) F14L17.5 protein - Arabidopsis thaliana (Mouse-ear cress)                                                                                                                  |
| LjSGA_002919.1.1 | 88  | comp. | (Q8VYF1) Putative 60S ribosomal protein L15-like protein                                                                                                                            |
| LjSGA_002920.1   | 88  | comp. | (Q8VYF1) Putative 60S ribosomal protein L15-like protein                                                                                                                            |
| LjSGA_006955.2   | 99  | comp. | (Q9M1S6) Hypothetical protein T5N23_100                                                                                                                                             |
| LjSGA_007637.1   | 189 | comp. | (Q9SUL8) Hypothetical protein F9N11.110 (Hypothetical protein AT4g30260)                                                                                                            |
| LjSGA_007871.1   | 45  | comp. | (Q9LSW6) 1-aminocyclopropane-1-carboxylate oxidase (At5g43450)                                                                                                                      |
| LjSGA_008407.1   | 62  | comp. | (Q8RWX2) Hypothetical protein At2g32170                                                                                                                                             |

|                  |     |       |                                                                                                             |
|------------------|-----|-------|-------------------------------------------------------------------------------------------------------------|
| LjSGA_008523.1   | 139 | comp. | (Q8L9N1) Hypothetical protein (Hypothetical protein At3g02120) (Hypothetical protein At3g02120/F1C9_9)      |
| LjSGA_008743.1.1 | 101 | comp. | (Q8LG57) Dihydroxypolyprenylbenzoate methyltransferase                                                      |
| LjSGA_009551.2   | 66  | comp. | (Q9M341) Hypothetical protein F5K20_150                                                                     |
| LjSGA_010575.1   | 113 | comp. | (Q9LZC9) Hypothetical protein F12E4_360                                                                     |
| LjSGA_010666.2   | 146 | comp. | (Q9ASW3) AT3g49260/F2K15_120 (Guard cell associated protein) (SF16-like protein)                            |
| LjSGA_011120.3   | 77  | comp. | (Q9C8T3) Putative D-ribulose-5-phosphate; 35237-36732 (At1g63290/F9N12_9) (Putative D-ribulose-5-phosphate) |
| LjSGA_012155.2   | 99  | comp. | (O49671) Replication A protein-like                                                                         |
| LjSGA_013183.1   | 61  | comp. | (Q9SKX3) Hypothetical protein At2g43040                                                                     |
| LjSGA_014065.1   | 202 | comp. | (O81315) F6N15.19 protein (Hypothetical protein AT4g00140)                                                  |
| LjSGA_014273.2.1 | 98  | comp. | (Q8GW57) Hypothetical protein At1g80150/F18B13_23 (At1g80150)                                               |
| LjSGA_014593.1   | 111 | comp. | (Q9FJW1) Arabidopsis thaliana genomic DNA, chromosome 5, TAC clone:K9I9 (At5g67620)                         |
| LjSGA_014633.1   | 34  | comp. | (Q9LZE4) Hypothetical protein F12E4_190                                                                     |
| LjSGA_015002.2   | 131 | comp. | (Q9FYB1) Splicing factor SC35                                                                               |
| LjSGA_015205.1   | 156 | comp. | (Q9LFG8) ABC transporter-like protein                                                                       |
| LjSGA_015289.3   | 61  | comp. | (Q8L8N3) Hypothetical protein (At2g17350) (Hypothetical protein At2g17350)                                  |
| LjSGA_015452.1   | 173 | comp. | (Q9LZS0) GT2-like protein                                                                                   |
| LjSGA_015493.2.1 | 62  | comp. | (Q9C5C1) Hypothetical protein At4g31330                                                                     |
| LjSGA_015526.2   | 65  | comp. | (Q9SCX9) Putative dihydroxyacetone 3-phosphate reductase dhaprd                                             |
| LjSGA_016178.2   | 67  | comp. | (Q9FGS2) Arabidopsis thaliana genomic DNA, chromosome 5, TAC clone:K6A12                                    |
| LjSGA_016333.3   | 126 | comp. | (Q9LW53) Arabidopsis thaliana genomic DNA, chromosome 3, P1 clone: MLM24                                    |
| LjSGA_016910.1   | 94  | comp. | (P93051) ORFc protein (Fragment)                                                                            |
| LjSGA_017288.2   | 44  | comp. | (Q8L7R5) Ethylene responsive element binding protein, putative (At3g23220)                                  |
| LjSGA_018239.1   | 119 | comp. | (Q9SVZ6) Putative acidic ribosomal protein                                                                  |

|                  |     |       |                                                                                                                                                |
|------------------|-----|-------|------------------------------------------------------------------------------------------------------------------------------------------------|
| LjSGA_018534.1   | 36  | comp. | (Q9FRR8) F22O13.15 (Hypothetical protein At1g08670)                                                                                            |
| LjSGA_018783.1.1 | 142 | comp. | (Q9LQ65) T30E16.6 (G-box binding factor, putative) (Transcription factor-like protein bZIP4)                                                   |
| LjSGA_020022.2   | 63  | comp. | (Q9ZVN2) T22H22.2 protein (At1g54570) (Hypothetical protein) (Hypothetical protein At1g54570/T22H22_2)                                         |
| LjSGA_021263.2   | 52  | comp. | (Q8VYB5) Hypothetical protein At1g48790                                                                                                        |
| LjSGA_021513.1   | 379 | comp. | (Q9ZUN0) Hypothetical protein At2g19630                                                                                                        |
| LjSGA_021693.1.1 | 124 | comp. | (Q9LZX9) Hypothetical protein T4C21_260 (Hypothetical protein At3g60850)                                                                       |
| LjSGA_021934.2   | 46  | comp. | (Q3EB84) Protein At3g11540                                                                                                                     |
| LjSGA_023473.2   | 79  | comp. | (Q3E7U8) Protein At5g26620                                                                                                                     |
| LjSGA_023523.2   | 81  | comp. | (Q6IDL4) At1g09580                                                                                                                             |
| LjSGA_023990.1   | 54  | comp. | (O48822) Expressed protein (Hypothetical protein)                                                                                              |
| LjSGA_024222.1   | 62  | comp. | (P93048) GAG1At protein (Hypothetical protein At1g16000) (Hypothetical protein) (Hypothetical protein At1g16000/T24D18_10) (T24D18.10 protein) |
| LjSGA_024445.1   | 80  | comp. | (Q94JU2) AT3g28050/MMG15_6                                                                                                                     |
| LjSGA_025453.1.1 | 84  | comp. | (Q8LFQ6) Glutaredoxin                                                                                                                          |
| LjSGA_026270.1   | 76  | comp. | (Q9SN67) Hypothetical protein F25I24.20 (Hypothetical protein At4g10810) (Hypothetical protein)                                                |
| LjSGA_027137.1   | 195 | comp. | (Q67XK7) Peroxidase ATP17a like protein (Fragment)                                                                                             |
| LjSGA_027260.2   | 173 | comp. | (Q9LZS6) Cucumisin-like protein                                                                                                                |
| LjSGA_027419.1   | 116 | comp. | (Q9M899) F16B3.4 protein                                                                                                                       |
| LjSGA_027634.3   | 152 | comp. | (Q9FGZ6) Protein kinase                                                                                                                        |
| LjSGA_028078.1   | 120 | comp. | (Q9C9M8) MATE efflux family protein, putative                                                                                                  |
| LjSGA_028296.1   | 68  | comp. | (O49286) F22K20.10 protein (At1g77000) (F-box protein family, AtFBL5)                                                                          |
| LjSGA_028456.1   | 147 | comp. | (Q9FK26) Arabidopsis thaliana genomic DNA, chromosome 5, TAC clone:K18G13                                                                      |
| LjSGA_029221.1   | 108 | comp. | (Q9FJ30) Similarity to heat shock transcription factor HSF30                                                                                   |
| LjSGA_029354.2   | 85  | comp. | (Q6NKS1) At5g01700                                                                                                                             |

|                  |     |       |                                                                                                                                                  |
|------------------|-----|-------|--------------------------------------------------------------------------------------------------------------------------------------------------|
| LjSGA_029362.1   | 107 | comp. | (Q9ZQA5) Putative gibberellin beta-hydroxylase                                                                                                   |
| LjSGA_030182.1   | 80  | comp. | (Q8RWW5) Putative cell differentiation protein                                                                                                   |
| LjSGA_030272.1   | 49  | comp. | (Q8VZ42) Hypothetical protein At2g41835                                                                                                          |
| LjSGA_030321.2   | 111 | comp. | (Q6NPM5) Hypothetical protein At5g62200                                                                                                          |
| LjSGA_030863.1   | 78  | comp. | (Q9LRQ0) EmbI/CAB39684.1                                                                                                                         |
| LjSGA_031645.1   | 43  | comp. | (Q9M2S7) Peptidyl-prolyl cis-trans isomerase                                                                                                     |
| LjSGA_031979.1   | 120 | comp. | (Q9ZPU2) Putative MYB family transcription factor (MYB transcription factor)                                                                     |
| LjSGA_033206.1   | 57  | comp. | (Q9LQN3) F5D14.2 protein (Hypothetical protein F27G20_13) (At1g32260)                                                                            |
| LjSGA_033907.1   | 157 | comp. | (Q9SRQ0) T21P5.12 protein (Hypothetical protein)                                                                                                 |
| LjSGA_034505.1   | 92  | comp. | (Q8VY85) Hypothetical protein At2g06010                                                                                                          |
| LjSGA_034653.1   | 165 | comp. | (Q8GY42) Hypothetical protein At1g61110/F11P17_16 (At1g61110)                                                                                    |
| LjSGA_036244.1.1 | 65  | comp. | (Q9M011) Light-inducible protein ATLS1                                                                                                           |
| LjSGA_036541.1   | 160 | comp. | (Q3E862) Protein At5g64360                                                                                                                       |
| LjSGA_037158.1   | 70  | comp. | (Q93Z17) AT5g46160/MCL19_22 (HUELLENLOS PARALOG)                                                                                                 |
| LjSGA_037585.1   | 101 | comp. | (Q8W4M2) Hypothetical protein F5K20.24                                                                                                           |
| LjSGA_039497.1   | 59  | comp. | (Q8LE14) Hypothetical protein                                                                                                                    |
| LjSGA_039562.1   | 70  | comp. | (Q9LTT5) Similarity to unknown protein                                                                                                           |
| LjSGA_040171.1   | 121 | comp. | (Q9LQR4) T4O12.25                                                                                                                                |
| LjSGA_040277.1   | 75  | comp. | (Q8L8B8) Hypothetical protein At2g37210/T2N18.3                                                                                                  |
| LjSGA_040638.1   | 66  | comp. | (Q9FY93) NAM-like protein (AT5g13180/T19L5_140)                                                                                                  |
| LjSGA_041144.2   | 53  | comp. | (Q9XGR4) Protein phosphatase 2A 62 kDa B" regulatory subunit (Protein phosphatase 2A 62 kDa B regulatory subunit) (Protein phosphatase 2A alpha) |
| LjSGA_042787.1   | 50  | comp. | (Q8VXX3) Hypothetical protein At5g58740                                                                                                          |
| LjSGA_043084.1   | 102 | comp. | (Q9FY93) NAM-like protein (AT5g13180/T19L5_140)                                                                                                  |
| LjSGA_045043.1   | 134 | comp. | (O23637) Argininosuccinate lyase (EC 4.3.2.1)                                                                                                    |

|                  |     |       |                                                                                                                       |
|------------------|-----|-------|-----------------------------------------------------------------------------------------------------------------------|
| LjSGA_045407.1   | 61  | comp. | (Q9SFE9) T26F17.9 (GONST5 Golgi Nucleotide sugar transporter)                                                         |
| LjSGA_047860.1   | 107 | comp. | (Q9SSG1) F25A4.26 protein                                                                                             |
| LjSGA_048292.1   | 116 | comp. | (Q3EA10) Protein At4g16195                                                                                            |
| LjSGA_048464.1   | 89  | comp. | (Q9LUI2) Centromere protein                                                                                           |
| LjSGA_048568.1   | 49  | comp. | (Q4TYZ7) Ubiquitinating enzyme                                                                                        |
| LjSGA_048658.2   | 60  | comp. | (Q9SRX9) F22D16.14 protein (RING finger family protein)                                                               |
| LjSGA_048822.1   | 66  | comp. | (Q9M338) Reductase-like protein                                                                                       |
| LjSGA_051219.1   | 143 | comp. | (O23120) F10G19.2 protein (T26J12.18 protein)                                                                         |
| LjSGA_052201.1   | 83  | comp. | (Q3E8B1) Protein At5g55100                                                                                            |
| LjSGA_052510.2   | 80  | comp. | (Q9FKK2) MADS-box protein-like                                                                                        |
| LjSGA_053543.1   | 154 | comp. | (Q9SVT5) Hypothetical protein F17L22.80 (Hypothetical protein) (AT4g21620/F17L22_80) (Hypothetical protein At4g21620) |
| LjSGA_054462.1   | 74  | comp. | (Q8W4Q1) Hypothetical protein (At4g35360/F23E12_80)                                                                   |
| LjSGA_054884.1   | 122 | comp. | (Q9LZW0) Putative zinc finger protein                                                                                 |
| LjSGA_055358.1   | 102 | comp. | (Q9C8Y6) Hypothetical protein T27F4.6 (F-box family protein)                                                          |
| LjSGA_056007.1   | 116 | comp. | (Q9FIR9) EmbI CAB62461.1 (At5g24660) (Hypothetical protein) (Hypothetical protein At5g24660/MXC17_2)                  |
| LjSGA_056309.1   | 85  | comp. | (Q9SCK6) Putative NAC2 protein                                                                                        |
| LjSGA_056636.1   | 101 | comp. | (Q9FNB1) GbI AAD43168.1                                                                                               |
| LjSGA_058572.1   | 59  | comp. | (O80632) Hypothetical protein At2g39450                                                                               |
| LjSGA_058637.1   | 92  | comp. | (Q9LSH0) GbI AAF26109.1 (Hypothetical protein At3g17780)                                                              |
| LjSGA_059230.1   | 49  | comp. | (Q53YT9) TFII B2 (Fragment)                                                                                           |
| LjSGA_059377.1.1 | 89  | comp. | (Q8LFY6) Hypothetical protein                                                                                         |
| LjSGA_060115.1   | 124 | comp. | (Q84MB5) At5g25752                                                                                                    |
| LjSGA_060805.1   | 153 | comp. | (Q8VYZ8) Hypothetical protein At1g64430                                                                               |

|                  |     |       |                                                                                                                        |
|------------------|-----|-------|------------------------------------------------------------------------------------------------------------------------|
| LjSGA_064251.1   | 51  | comp. | (Q9FM58) Arabidopsis thaliana genomic DNA, chromosome 5, P1 clone:MDF20                                                |
| LjSGA_065721.1   | 50  | comp. | (Q9LPP3) F18K10.11 protein (Hypothetical protein At3g10530)                                                            |
| LjSGA_065857.1   | 60  | comp. | (Q9LSQ5) 1,4-benzoquinone reductase-like; Trp repressor binding protein-like (1,4-benzoquinone reductase-like protein) |
| LjSGA_066816.1   | 93  | comp. | (Q9LJW5) GblAAF15936.1 (At3g28917) (Hypothetical protein)                                                              |
| LjSGA_066967.1   | 93  | comp. | (Q9LJW5) GblAAF15936.1 (At3g28917) (Hypothetical protein)                                                              |
| LjSGA_067389.1   | 98  | comp. | (Q9C6Y7) Aldehyde dehydrogenase, putative                                                                              |
| LjSGA_067452.1   | 82  | comp. | (Q9LFR7) Hypothetical protein F1N13_220 (Hypothetical protein At5g16080)                                               |
| LjSGA_068625.1   | 50  | comp. | (Q3EBJ1) Protein At2g40110                                                                                             |
| LjSGA_070010.1   | 64  | comp. | (Q9LS90) Arabidopsis thaliana genomic DNA, chromosome 3, P1 clone: MXC7 (Hypothetical protein At3g22990)               |
| LjSGA_070125.1   | 105 | comp. | (Q3EB61) Protein At3g14850                                                                                             |
| LjSGA_072650.2   | 45  | comp. | (Q94BX4) AT3g45100/T14D3_40                                                                                            |
| LjSGA_074044.1   | 57  | comp. | (Q9FE17) Transcription regulator Sir2-like protein                                                                     |
| LjSGA_075950.2   | 67  | comp. | (Q8GW63) Hypothetical protein At1g64600/F1N19_16 (At1g64600)                                                           |
| LjSGA_076490.1   | 145 | comp. | (Q2V4E4) Protein At1g67490                                                                                             |
| LjSGA_076760.1.1 | 140 | comp. | (Q9FMQ4) Similarity to S1 self-incompatibility protein (Self-incompatibility protein-related)                          |
| LjSGA_076936.1   | 127 | comp. | (Q9ZS85) T4B21.1 protein                                                                                               |
| LjSGA_077182.1   | 94  | comp. | (Q2V363) Protein At5g19473                                                                                             |
| LjSGA_078266.1   | 66  | comp. | (Q9FY93) NAM-like protein (AT5g13180/T19L5_140)                                                                        |
| LjSGA_078852.1   | 91  | comp. | (Q53YQ5) Peroxidase ATP13A                                                                                             |
| LjSGA_078984.1   | 112 | comp. | (Q8GX25) Hypothetical protein At1g76250/T23E18_34 (At1g76250)                                                          |
| LjSGA_079465.1   | 43  | comp. | (Q9C8H5) Hypothetical protein F19C24.14                                                                                |
| LjSGA_081114.1   | 95  | comp. | (Q9FIS3) Arabidopsis thaliana genomic DNA, chromosome 5, P1 clone:MTG10 (At5g62150)                                    |
| LjSGA_081363.1   | 75  | comp. | (Q8LG56) Hypothetical protein (At1g05205)                                                                              |

|                  |     |       |                                                                                                     |
|------------------|-----|-------|-----------------------------------------------------------------------------------------------------|
| LjSGA_082634.2   | 61  | comp. | (Q8RXY1) Hypothetical protein At4g26965                                                             |
| LjSGA_083147.1   | 116 | comp. | (Q9FT50) Hypothetical protein T25B15_90                                                             |
| LjSGA_083280.1   | 75  | comp. | (Q94BR1) Putative topoisomerase                                                                     |
| LjSGA_083855.1   | 94  | comp. | (Q2QB51) Fused                                                                                      |
| LjSGA_084155.1   | 68  | comp. | (Q9SR79) T22K18.2 protein                                                                           |
| LjSGA_084620.2   | 110 | comp. | (Q8VYM4) Hypothetical protein At3g52150                                                             |
| LjSGA_085236.2   | 58  | comp. | (Q9MA90) T12H1.26 protein (AT3g05290/T12H1_26)                                                      |
| LjSGA_086655.1   | 67  | comp. | (Q3EDJ2) Protein At1g03780                                                                          |
| LjSGA_088036.1   | 153 | comp. | (Q8VYZ8) Hypothetical protein At1g64430                                                             |
| LjSGA_088784.2   | 48  | comp. | (Q8GXU5) Hypothetical protein At5g48850/K24G6_19 (At5g48850)                                        |
| LjSGA_088974.1   | 136 | comp. | (Q3EA10) Protein At4g16195                                                                          |
| LjSGA_089367.1   | 91  | comp. | (Q9LPQ9) F15H18.8                                                                                   |
| LjSGA_089728.1   | 52  | comp. | (Q6NKW8) Hypothetical protein At2g22620                                                             |
| LjSGA_090310.1   | 130 | comp. | (Q9M280) Hypothetical protein T22K7_130 (At3g44450)                                                 |
| LjSGA_092537.1   | 94  | comp. | (Q8VY59) Blue copper protein, putative (At3g27200)                                                  |
| LjSGA_097198.1.1 | 64  | comp. | (Q3EAF2) Protein At3g63400                                                                          |
| LjSGA_097619.2   | 90  | comp. | (Q8VYP5) Hypothetical protein At3g60800                                                             |
| LjSGA_098555.1   | 56  | comp. | (Q9FMS3) EmblCAB88996.1 (At5g22280) (Hypothetical protein) (Hypothetical protein At5g22280; MWD9.6) |
| LjSGA_099976.2   | 57  | comp. | (Q8RWU7) Putative membrane trafficking factor (CDC48-interacting UBX-domain protein)                |
| LjSGA_101271.1   | 153 | comp. | (Q94BY8) AT5g40660/MNF13_180                                                                        |
| LjSGA_103898.1   | 44  | comp. | (Q9T083) Hypothetical protein AT4g27590                                                             |
| LjSGA_104509.1   | 129 | comp. | (Q3E8T5) Protein At5g31412                                                                          |
| LjSGA_105453.1   | 59  | comp. | (Q9S9Q9) F26G16.2 protein                                                                           |
| LjSGA_106850.1   | 73  | comp. | (Q9FKE9) GTP-binding protein-like; root hair defective 3 protein-like                               |



|                    |     |       |                                                                                                               |
|--------------------|-----|-------|---------------------------------------------------------------------------------------------------------------|
| LjSGA_107162.1     | 54  | comp. | (Q9C6A5) Hypothetical protein F9E11.1                                                                         |
| LjSGA_108363.1     | 126 | comp. | (Q9LKT9) Hypothetical protein T32B20.c                                                                        |
| LjSGA_111111.1     | 49  | comp. | (O22283) Expressed protein (At2g39720/T5I7.2) (Hypothetical protein) (RING-H2 finger protein RHC2a)           |
| LjSGA_113929.1     | 79  | comp. | (Q9FNJ1) Arabidopsis thaliana genomic DNA, chromosome 5, P1 clone:MDJ22                                       |
| LjSGA_115867.1     | 51  | comp. | (Q9FJJ5) Microtubule-associated protein EB1-like protein                                                      |
| LjSGA_117470.2     | 114 | comp. | (Q9C5C8) Hypothetical protein At4g21860                                                                       |
| LjSGA_118638.1     | 92  | comp. | (Q9C920) Putative deoxyoctulononic acid synthetase; 116195-114393 (Putative CMP-KDO synthetase) (EC 2.7.7.38) |
| LjSGA_120459.1     | 106 | comp. | (Q3ED77) Protein At1g21610                                                                                    |
| LjSGA_121784.1     | 67  | comp. | (Q9XI46) F9L1.17 protein (At1g15220/F9L1_17) (Hypothetical protein)                                           |
| LjSGA_121922.1     | 62  | comp. | (Q56YF5) Hypothetical protein                                                                                 |
| LjSGA_128393.0.1   | 56  | comp. | (Q9LNX7) F22G5.8                                                                                              |
| LjSGA_131300.1     | 55  | comp. | (Q9LTJ9) Arabidopsis thaliana genomic DNA, chromosome 5, BAC clone:F17P19                                     |
| LjSGA_135560.1.1   | 96  | comp. | (Q9LS09) Anti-silencing protein-like (Anti-silencing factor 1-like protein) (Anti-silencing function 1b)      |
| LjSGA_138952.1     | 78  | comp. | (Q3E7R7) Protein At5g10580                                                                                    |
| LjSGA_141014.1     | 60  | comp. | (Q2HIF8) At2g45200                                                                                            |
| LjSGA_142103.1     | 36  | comp. | (Q9FMA3) Peroxisomal targeting signal type 1 receptor                                                         |
| LjSGA_145184.2     | 77  | comp. | (Q9C7N2) Hypothetical protein F15D2.24 (At1g29690/F15D2_24)                                                   |
| chr1.CM0171.470.nc | 127 | comp. | (A0A3A0) Putative ribosomal protein (Fragment) - Artemisia annua (Sweet wormwood)                             |
| LjSGA_060753.1     | 259 | comp. | (Q752C9) AFR646Wp                                                                                             |
| LjSGA_076074.1.1   | 118 | comp. | (Q9AXF3) Lipid transfer protein                                                                               |
| LjSGA_104925.1     | 118 | comp. | (Q9AXF3) Lipid transfer protein                                                                               |
| LjSGA_051491.2     | 165 | comp. | (Q29RT0) Hypothetical protein                                                                                 |
| chr3.CM0574.200.nd | 93  | comp. | (A1YN04) Hydrogen-transporting ATP synthase - Brassica campestris (Field mustard)                             |

|                      |     |       |                                                                                                      |
|----------------------|-----|-------|------------------------------------------------------------------------------------------------------|
| LjT13N04.50.nd       | 96  | comp. | (Q2PQL8) Putative aldehyde dehydrogenase - Brassica campestris (Field mustard)                       |
| LjSGA_000444.1       | 74  | comp. | (Q6YSP5) ATPase subunit 9                                                                            |
| LjSGA_078671.1.1     | 91  | comp. | (Q8RX50) PSR9 (Fragment)                                                                             |
| chr1.CM0668.170.nd   | 64  | comp. | (Q43408) Putative imbibition protein - Brassica oleracea (Wild cabbage)                              |
| chr1.CM0248.470.nd   | 311 | comp. | (Q566W6) Zgc:112425 - Brachydanio rerio (Zebrafish) (Danio rerio)                                    |
| chr3.LjT34H24.110.nd | 160 | comp. | (Q6P3H0) Zgc:77882 (Novel protein) - Brachydanio rerio (Zebrafish) (Danio rerio)                     |
| LjT13F18.40.nd       | 176 | comp. | (Q566W6) Zgc:112425 - Brachydanio rerio (Zebrafish) (Danio rerio)                                    |
| LjSGA_004944.1       | 131 | comp. | (Q566W6) Hypothetical protein zgc:112425                                                             |
| LjSGA_106373.2       | 81  | comp. | (Q6PGX7) Hypothetical protein zff9                                                                   |
| LjSGA_016401.1       | 68  | comp. | (Q7XAW7) Putative lipase (Fragment)                                                                  |
| LjSGA_065424.1.1     | 94  | comp. | (Q4ABV6) 52O08_1 (Fragment)                                                                          |
| LjSGA_030619.1       | 80  | comp. | (Q621R2) Hypothetical protein CBG02383                                                               |
| chr2.CM0099.160.nc   | 291 | comp. | (Q23330) Hypothetical protein - Caenorhabditis elegans                                               |
| chr5.CM0040.490.nc   | 147 | comp. | (O45577) Hypothetical protein cpf-2 - Caenorhabditis elegans                                         |
| chr2.LjT41F02.40.nc  | 64  | comp. | (Q8S344) Hypothetical protein upa9 - Capsicum annuum (Bell pepper)                                   |
| chr1.LjT41E18.190.nc | 169 | comp. | (A1DR82) AT-hook DNA-binding protein - Catharanthus roseus (Rosy periwinkle) (Madagascar periwinkle) |
| LjSGA_034638.1       | 80  | comp. | (Q9ZRV5) Basic blue copper protein                                                                   |
| LjSGA_046118.1       | 118 | comp. | (Q949L4) Putative polyprotein (Fragment)                                                             |
| LjSGA_127044.1       | 154 | comp. | (Q949L4) Putative polyprotein (Fragment)                                                             |
| LjSGA_140739.1       | 43  | comp. | (Q8L5F9) Microtubule associated protein                                                              |
| LjSGA_140929.1       | 64  | comp. | (Q949L4) Putative polyprotein (Fragment)                                                             |
| LjSGA_074658.1.1     | 70  | comp. | (Q84V02) Vacuolar membrane ATPase subunit c''                                                        |
| LjSGA_102653.1.1     | 70  | comp. | (Q84V02) Vacuolar membrane ATPase subunit c''                                                        |
| LjSGA_018510.1       | 108 | comp. | (Q3HM93) Glutathione S-transferase                                                                   |

|                      |     |       |                                                                                                                      |
|----------------------|-----|-------|----------------------------------------------------------------------------------------------------------------------|
| chr2.CM0018.280.nd   | 59  | comp. | (Q2TM26) STO-1 - <i>Coffea canephora</i> (Robusta coffee)                                                            |
| LjSGA_024451.2       | 104 | comp. | (Q8VXQ2) Aldehyde dehydrogenase (EC 1.2.1.3)                                                                         |
| chr4.CM0025.20.nd    | 63  | comp. | (Q96403) Stellacyanin - <i>Cucumis sativus</i> (Cucumber)                                                            |
| LjSGA_012718.2       | 694 | comp. | (Q6BRX6) Similar to CA1766 CaNOP4 <i>Candida albicans</i> CaNOP4 Nucleolar protein                                   |
| LjSGA_036483.1       | 184 | comp. | (Q6BYF3) <i>Debaryomyces hansenii</i> chromosome A of strain CBS767 of <i>Debaryomyces hansenii</i>                  |
| chr1.CM0122.800.nd   | 310 | comp. | (Q55GV8) Hypothetical protein - <i>Dictyostelium discoideum</i> AX4                                                  |
| chr2.CM0002.430.nc   | 268 | comp. | (Q869R0) Similar to <i>Entamoeba histolytica</i> . Myosin heavy chain - <i>Dictyostelium discoideum</i> (Slime mold) |
| LjSGA_005100.1       | 103 | comp. | (Q9V3T8) SR family splicing factor SC35 (CG5442-PB, isoform B) (LD32469p)                                            |
| chr2.LjT16L14.100.nc | 398 | comp. | (O96063) Myosin heavy chain (Fragment) - <i>Dugesia japonica</i> (Planarian)                                         |
| chr1.LjT45O14.120.nd | 151 | comp. | (Q71E52) Cytochrome f (Fragment) - <i>Fagus sylvatica</i> (Beechnut)                                                 |
| LjSGA_012361.1       | 66  | comp. | (Q9ZPA7) ABA-inducible protein                                                                                       |
| LjSGA_019294.2       | 74  | comp. | (Q9ZRV0) Metallothionein-like protein class II                                                                       |
| LjSGA_027307.1       | 136 | comp. | (Q70DJ9) Calcium binding protein                                                                                     |
| LjSGA_037289.1       | 105 | comp. | (Q5Y381) Aldo/keto reductase                                                                                         |
| chr2.CM0346.240.nc   | 462 | comp. | (Q4ICJ3) Hypothetical protein - <i>Gibberella zeae</i> ( <i>Fusarium graminearum</i> )                               |
| chr3.CM0634.680.nc   | 188 | comp. | (Q7X9S1) Fiber protein Fb19 (Fragment) - <i>Gossypium barbadense</i> (Sea-island cotton) (Egyptian cotton)           |
| chr3.CM0282.820.nc   | 163 | comp. | (Q5U8L5) AP2/EREBP transcription factor ERF-1 - <i>Gossypium hirsutum</i> (Upland cotton)                            |
| chr3.CM0112.30.nc    | 386 | comp. | (Q9ZSP8) Latex-abundant protein - <i>Hevea brasiliensis</i> (Para rubber tree)                                       |
| LjSGA_033388.1       | 66  | comp. | (Q40068) Peroxidase                                                                                                  |
| LjSGA_078340.1       | 50  | comp. | (Q6FGU4) HIST3H3 protein (H3 histone family, member T) (Histone 3, H3) (Fragment)                                    |
| LjSGA_040049.2       | 87  | comp. | (Q6JJ39) Putative adapitin protein                                                                                   |
| LjSGA_143911.1.1     | 36  | comp. | (Q7XJB0) Eukaryotic translation initiation factor iso4E                                                              |
| LjSGA_096416.1       | 192 | comp. | (Q4Q1R0) Universal minicircle sequence binding protein (UMSBP), putative                                             |

|                     |     |       |                                                                                                                                                  |
|---------------------|-----|-------|--------------------------------------------------------------------------------------------------------------------------------------------------|
| LjSGA_117099.1      | 182 | comp. | (Q4Q1R0) Universal minicircle sequence binding protein (UMSBP), putative                                                                         |
| LjSGA_080830.1      | 45  | comp. | (Q93YH3) ATP citrate lyase b-subunit (EC 4.1.3.8)                                                                                                |
| LjSGA_019213.1.1    | 58  | comp. | (Q96569) L-lactate dehydrogenase (EC 1.1.1.27)                                                                                                   |
| LjSGA_076667.1      | 98  | comp. | (Q6V7U8) Putative anthocyanin permease                                                                                                           |
| chr1.CM0393.250.nd  | 80  | comp. | (Q5GAR2) Hypothetical protein - Zea mays (Maize)                                                                                                 |
| chr5.CM0096.730.nd  | 90  | comp. | (Q8S532) Cytosolic aldehyde dehydrogenase RF2C - Zea mays (Maize)                                                                                |
| chr4.CM0044.290.nd  | 126 | comp. | (Q84XY6) Cystatin - Malus domestica (Apple) (Malus sylvestris)                                                                                   |
| LjSGA_022997.1.1    | 64  | comp. | (Q9XGY3) Small zinc finger-like protein (Fragment)                                                                                               |
| LjSGA_062048.1      | 92  | comp. | (Q2LME7) MYB14                                                                                                                                   |
| LjSGA_028575.2      | 68  | comp. | (Q9AYN0) Inhibitor against trypsin (Fragment)                                                                                                    |
| chr4.CM0288.490.nc  | 134 | comp. | (Q1ENZ8) Hypothetical protein - Musa acuminata (Banana)                                                                                          |
| chr4.CM0429.30.nd   | 268 | comp. | (A1YUL9) Impa2 - Nicotiana benthamiana                                                                                                           |
| chr6.CM0539.340.nd  | 57  | comp. | (Q2LFC3) AGO1-2 (Fragment) - Nicotiana benthamiana                                                                                               |
| LjSGA_114393.2      | 78  | comp. | (Q5YLB4) DNA gyrase B subunit                                                                                                                    |
| LjSGA_032157.0.1    | 57  | comp. | (Q3C1M8) Ribosomal protein S7                                                                                                                    |
| chr4.CM0061.290.nc  | 700 | comp. | (Q8JIN6) Transformer-2b - Oryzias latipes (Medaka fish) (Japanese ricefish)                                                                      |
| chr1.CM0017.460.nc  | 227 | comp. | (A3B432) Hypothetical protein - Oryza sativa (japonica cultivar-group)                                                                           |
| chr1.CM0064.540.nc  | 387 | comp. | (Q84SZ0) Hypothetical protein OSJNBa0087C10.17 - Oryza sativa (japonica cultivar-group)                                                          |
| chr1.CM0094.790.nd  | 185 | comp. | (Q8LHL0) Putative splicing factor, arginine/serine-rich 2 (Splicing factor SC35) (Os07g0623300 protein) - Oryza sativa (japonica cultivar-group) |
| chr1.CM0141.440.nd  | 90  | comp. | (A3BLD9) Hypothetical protein - Oryza sativa (japonica cultivar-group)                                                                           |
| chr1.CM0206.80.nd   | 72  | comp. | (A3AH61) Hypothetical protein - Oryza sativa (japonica cultivar-group)                                                                           |
| chr1.LjT04O21.90.nd | 63  | comp. | (A3AHR1) Hypothetical protein - Oryza sativa (japonica cultivar-group)                                                                           |
| chr1.LjT32B13.70.nd | 146 | comp. | (A2ZJV9) Hypothetical protein - Oryza sativa (indica cultivar-group)                                                                             |
| chr2.CM0065.190.nc  | 134 | comp. | (Q6F303) Hypothetical protein P0483D07.18 - Oryza sativa (japonica cultivar-group)                                                               |

|                      |     |       |                                                                                                                                                                                                          |
|----------------------|-----|-------|----------------------------------------------------------------------------------------------------------------------------------------------------------------------------------------------------------|
| chr2.CM0826.330.nd   | 126 | comp. | (A2WVA2) Hypothetical protein - <i>Oryza sativa</i> (indica cultivar-group)                                                                                                                              |
| chr2.CM0903.360.nd   | 525 | comp. | (A3BXI6) Hypothetical protein - <i>Oryza sativa</i> (japonica cultivar-group)                                                                                                                            |
| chr2.LjT02E02.170.nd | 104 | comp. | (Q7X902) P0076O17.1 protein (Hypothetical protein) (OJ000114_01.19 protein) - <i>Oryza sativa</i> (japonica cultivar-group)                                                                              |
| chr2.LjT16L14.70.nc  | 316 | comp. | (Q6ZDR7) Putative splicing factor, arginine/serine-rich (Os08g0486200 protein) - <i>Oryza sativa</i> (japonica cultivar-group)                                                                           |
| chr2.LjT41F02.30.nc  | 64  | comp. | (Q6I5W4) Hypothetical protein OJ1076_H08.11 (Hypothetical protein) (Os05g0217000 protein) - <i>Oryza sativa</i> (japonica cultivar-group)                                                                |
| chr2.LjT44L24.20.nd  | 77  | comp. | (A3C8H5) Hypothetical protein - <i>Oryza sativa</i> (japonica cultivar-group)                                                                                                                            |
| chr3.CM0160.790.nd   | 93  | comp. | (Q5W707) Hypothetical protein OSJNBa0037H06.2 (Hypothetical protein) (Os05g0244600 protein) - <i>Oryza sativa</i> (japonica cultivar-group)                                                              |
| chr3.LjT04G21.130.nd | 91  | comp. | (Q7X902) P0076O17.1 protein (Hypothetical protein) (OJ000114_01.19 protein) - <i>Oryza sativa</i> (japonica cultivar-group)                                                                              |
| chr3.LjT15F18.170.nd | 86  | comp. | (Q8H065) Hypothetical protein OSJNBa0014O06.7 (Hypothetical protein) (Mitochondrial ribosomal protein L51/S25/CI-B8 family protein, putative, expressed) - <i>Oryza sativa</i> (japonica cultivar-group) |
| chr4.CM0175.610.nd   | 115 | comp. | (Q5JKG8) Hypothetical protein B1033B05.21 - <i>Oryza sativa</i> (japonica cultivar-group)                                                                                                                |
| chr4.CM0256.410.nc   | 112 | comp. | (A2XXE6) Hypothetical protein - <i>Oryza sativa</i> (indica cultivar-group)                                                                                                                              |
| chr4.CM0297.180.nc   | 175 | comp. | (Q6Z6S6) Hypothetical protein P0705A04.5 - <i>Oryza sativa</i> (japonica cultivar-group)                                                                                                                 |
| chr4.CM0429.340.nc   | 151 | comp. | (Q2QWQ9) GRF zinc finger family protein (Hypothetical protein) - <i>Oryza sativa</i> (japonica cultivar-group)                                                                                           |
| chr4.CM0432.270.nd   | 43  | comp. | (A3CBH1) Hypothetical protein - <i>Oryza sativa</i> (japonica cultivar-group)                                                                                                                            |
| chr4.CM0432.310.nd   | 43  | comp. | (A3CBH1) Hypothetical protein - <i>Oryza sativa</i> (japonica cultivar-group)                                                                                                                            |
| chr4.CM0692.420.nd   | 165 | comp. | (A2WRN1) Hypothetical protein - <i>Oryza sativa</i> (indica cultivar-group)                                                                                                                              |
| chr6.CM0045.280.nd   | 267 | comp. | (Q6YUR8) Putative Glycine-rich protein 2 (Hypothetical protein) (Os02g0121100 protein) - <i>Oryza sativa</i> (japonica cultivar-group)                                                                   |

|                      |     |       |                                                                                                                                       |
|----------------------|-----|-------|---------------------------------------------------------------------------------------------------------------------------------------|
| chr6.CM0314.350.nc   | 173 | comp. | (Q6H5M3) Hypothetical protein OJ1759_F09.16 (Hypothetical protein P0564H06.22) - Oryza sativa (japonica cultivar-group)               |
| chr6.LjT15B19.150.nd | 209 | comp. | (A3BPS7) Hypothetical protein - Oryza sativa (japonica cultivar-group)                                                                |
| CM0385.330.nd        | 170 | comp. | (A3BZC5) Hypothetical protein - Oryza sativa (japonica cultivar-group)                                                                |
| LjT01F24.50.nd       | 173 | comp. | (Q7XK11) OSJNBa0044K18.33 protein - Oryza sativa (japonica cultivar-group)                                                            |
| LjT03L21.140.nd      | 62  | comp. | (A3BYJ5) Hypothetical protein - Oryza sativa (japonica cultivar-group)                                                                |
| LjT06N06.330.nd      | 62  | comp. | (Q5N9R6) Transducin family protein / WD-40 repeat family protein-like (Os01g0702400 protein) - Oryza sativa (japonica cultivar-group) |
| LjT06N06.340.nd      | 60  | comp. | (Q65XE1) Hypothetical protein OJ1504_G04.13 - Oryza sativa (japonica cultivar-group)                                                  |
| LjT34L14.70.nc       | 515 | comp. | (Q6ZKI2) Putative RNA recognition motif (RRM)-containing protein (Os08g0139000 protein) - Oryza sativa (japonica cultivar-group)      |
| LjT39F13.110.nc      | 904 | comp. | (Q8LNH8) Putative glycine-rich protein (Hypothetical protein) - Oryza sativa (japonica cultivar-group)                                |
| LjT46I09.40.nd       | 166 | comp. | (A2XWZ2) Hypothetical protein - Oryza sativa (indica cultivar-group)                                                                  |
| LjSGA_004896.2.1     | 78  | comp. | (Q7X877) P0076O17.3 protein                                                                                                           |
| LjSGA_005817.3       | 58  | comp. | (Q6K4A7) Hypothetical protein OJ1595_D08.10 (Hypothetical protein P0676H02.28)                                                        |
| LjSGA_010360.2       | 68  | comp. | (Q7XD75) Small ribonucleoprotein, putative                                                                                            |
| LjSGA_011834.2       | 81  | comp. | (Q5ZBN9) Hypothetical protein P0704D04.8                                                                                              |
| LjSGA_013627.2       | 79  | comp. | (Q6H886) Hypothetical protein OJ1572_F02.6                                                                                            |
| LjSGA_017875.2       | 135 | comp. | (Q7XDF4) Hypothetical protein                                                                                                         |
| LjSGA_018270.1       | 78  | comp. | (Q852B4) Ras-related GTP-binding protein                                                                                              |
| LjSGA_019231.1       | 92  | comp. | (Q5VS25) Putative beta 1,3 glucan synthase                                                                                            |
| LjSGA_022399.1       | 113 | comp. | (Q7EYZ3) Putative placental protein 6                                                                                                 |
| LjSGA_023015.1       | 63  | comp. | (Q6YU88) Putative kinesin                                                                                                             |
| LjSGA_025069.1       | 47  | comp. | (Q7XQ14) OSJNBb0065L13.5 protein                                                                                                      |
| LjSGA_026483.1       | 123 | comp. | (Q6ZHC0) Putative GAMM1 protein                                                                                                       |

|                  |     |       |                                                                                       |
|------------------|-----|-------|---------------------------------------------------------------------------------------|
| LjSGA_029764.1   | 117 | comp. | (Q5QLP6) Putative ionotropic glutamate receptor homolog GLR4                          |
| LjSGA_030848.1   | 168 | comp. | (Q67UR6) Methyladenine glycosylase protein-like                                       |
| LjSGA_031607.1   | 44  | comp. | (Q8RV84) Putative 5-3 exoribonuclease                                                 |
| LjSGA_032372.1   | 72  | comp. | (Q658H0) Hypothetical protein P0538C01.24                                             |
| LjSGA_032836.1   | 117 | comp. | (Q7XC13) Expressed protein                                                            |
| LjSGA_036478.1   | 196 | comp. | (Q94DH7) Putative cysteine protease CP1                                               |
| LjSGA_039113.1   | 130 | comp. | (Q5WA77) MYB transcription factor-like                                                |
| LjSGA_042391.1   | 77  | comp. | (Q2QM65) Transparent testa 12 protein                                                 |
| LjSGA_043276.1   | 150 | comp. | (Q5Z990) Putative transformer-SR ribonucleoprotein                                    |
| LjSGA_047151.2   | 50  | comp. | (Q259B2) H0901F07.8 protein                                                           |
| LjSGA_048570.2   | 76  | comp. | (Q851R1) Hypothetical protein OSJNBa0052F07.12                                        |
| LjSGA_049098.1.1 | 69  | comp. | (Q5NBM8) Putative transcription factor                                                |
| LjSGA_049792.1   | 99  | comp. | (Q7X7M2) OSJNBb0003A12.5 protein                                                      |
| LjSGA_051587.2   | 57  | comp. | (Q6H805) Putative response regulator 9                                                |
| LjSGA_053671.1   | 170 | comp. | (Q6YY34) Hypothetical protein OSJNBb0056I22.9 (Hypothetical protein OSJNBa0016D04.44) |
| LjSGA_058499.1   | 136 | comp. | (Q8LHL0) Putative splicing factor, arginine/serine-rich 2 (Splicing factor SC35)      |
| LjSGA_059154.1   | 117 | comp. | (Q9AV46) Hypothetical protein OSJNBa0093B11.3 (Expressed protein)                     |
| LjSGA_060687.2   | 93  | comp. | (Q6K456) Putative plastid protein                                                     |
| LjSGA_062884.1   | 80  | comp. | (Q7XSQ7) OSJNBa0084K11.5 protein                                                      |
| LjSGA_064507.1   | 101 | comp. | (Q5U1I2) Class III peroxidase 111 precursor (EC 1.11.1.7)                             |
| LjSGA_067521.2.1 | 78  | comp. | (Q7F8I8) Calmodulin                                                                   |
| LjSGA_077028.1   | 56  | comp. | (Q948F9) Putative PAP-specific phosphatase                                            |
| LjSGA_079557.0.1 | 48  | comp. | (Q6K225) Phosphate translocator-like                                                  |
| LjSGA_085750.1   | 68  | comp. | (Q8H4Q9) GTP-binding protein Rab6                                                     |
| LjSGA_093272.1   | 117 | comp. | (Q7XEY9) SPX domain, putative                                                         |

|                      |     |       |                                                                                                        |
|----------------------|-----|-------|--------------------------------------------------------------------------------------------------------|
| LjSGA_095761.1       | 67  | comp. | (Q6K7U1) Putative pentatricopeptide (PPR) repeat-containing protein                                    |
| LjSGA_096059.1       | 66  | comp. | (Q2QNJ8) Prefoldin subunit 3, putative                                                                 |
| LjSGA_101824.1       | 36  | comp. | (Q84QA5) Hypothetical protein OJ1012B02.16                                                             |
| LjSGA_108567.1       | 111 | comp. | (Q651J5) Putative xenotropic and polytropic murine retrovirus receptor                                 |
| LjSGA_119225.1.1     | 106 | comp. | (Q7XQ30) OSJNBb0005B05.11 protein                                                                      |
| LjSGA_122485.1       | 93  | comp. | (Q5JMM6) Putative NOGO-interacting mitochondrial protein                                               |
| LjSGA_133676.2.1     | 91  | comp. | (Q6EUS1) Putative bacterial-induced peroxidase (Class III peroxidase 27 precursor) (EC 1.11.1.7)       |
| LjSGA_139108.1       | 66  | comp. | (Q7XM92) OSJNBb0060E08.7 protein                                                                       |
| chr1.CM0101.30.nc    | 376 | comp. | (Q01FQ9) Chromosome 01 contig 1, DNA sequence. (Fragment) - <i>Ostreococcus tauri</i>                  |
| LjSGA_079149.1.1     | 54  | comp. | (Q9MAW6) 60S ribosomal protein L27a                                                                    |
| chr1.LjT34H22.210.nd | 86  | comp. | (Q9FZ10) Serine threonine kinase homolog COK-4 - <i>Phaseolus vulgaris</i> (Kidney bean) (French bean) |
| LjT03D05.210.nd      | 64  | comp. | (A4GGF7) Ribosomal protein L23 - <i>Phaseolus vulgaris</i> (Kidney bean) (French bean)                 |
| LjT22M20.140.nd      | 92  | comp. | (Q9XFL4) Peroxidase 3 - <i>Phaseolus vulgaris</i> (Kidney bean) (French bean)                          |
| LjT22M20.150.nd      | 93  | comp. | (Q9XFL4) Peroxidase 3 - <i>Phaseolus vulgaris</i> (Kidney bean) (French bean)                          |
| chr2.LjT04L10.120.nc | 225 | comp. | (Q3ZDI8) SCF ubiquitin ligase - <i>Picea abies</i> (Norway spruce) ( <i>Picea excelsa</i> )            |
| chr2.LjT04L10.130.nc | 217 | comp. | (Q3ZDI8) SCF ubiquitin ligase - <i>Picea abies</i> (Norway spruce) ( <i>Picea excelsa</i> )            |
| chr2.LjT13P17.60.nd  | 85  | comp. | (Q5ZF84) Hypothetical protein - <i>Plantago major</i> (Common plantain)                                |
| chr3.CM0005.460.nc   | 346 | comp. | (Q8H6Q7) CTV.22 - <i>Poncirus trifoliata</i> (Hardy orange)                                            |
| chr3.CM0160.590.nd   | 261 | comp. | (Q41255) Arabinogalactan-protein - <i>Pyrus communis</i> (Pear)                                        |
| chr6.LjT04E21.220.nc | 336 | comp. | (A2V756) PpSFBB5-alpha protein - <i>Pyrus pyrifolia</i> (Japanese pear) ( <i>Pyrus serotina</i> )      |
| LjT10A21.80.nd       | 124 | comp. | (Q5ZGH7) Hypothetical protein - <i>Ricinus communis</i> (Castor bean)                                  |
| LjT19F24.100.nd      | 49  | comp. | (O24327) Orf protein - <i>Ricinus communis</i> (Castor bean)                                           |
| LjSGA_080171.1       | 79  | comp. | (Q9ZPL4) Pulvinus inward-rectifying channel for potassium SPICK1                                       |
| LjSGA_034221.1       | 184 | comp. | (O04925) 15.5 kDa oleosin                                                                              |



|                      |     |       |                                                                                                                          |
|----------------------|-----|-------|--------------------------------------------------------------------------------------------------------------------------|
| chr2.LjB15M17.20.nc  | 349 | comp. | (Q2PH52) SKP1-like protein - <i>Silene latifolia</i> (White campion) (Bladder campion)                                   |
| chr1.LjT14I13.260.nd | 191 | comp. | (Q5MAC2) Putative transcription regulator CPL1 - <i>Solanum lycopersicum</i> (Tomato) ( <i>Lycopersicon esculentum</i> ) |
| chr2.CM0262.130.nd   | 74  | comp. | (A0ZS62) Cytochrome P450 - <i>Solanum lycopersicum</i> (Tomato) ( <i>Lycopersicon esculentum</i> )                       |
| chr3.CM0216.410.nc   | 209 | comp. | (Q8H272) Metacaspase 1 (Fragment) - <i>Solanum lycopersicum</i> (Tomato) ( <i>Lycopersicon esculentum</i> )              |
| chr3.CM0216.710.nc   | 210 | comp. | (Q8H272) Metacaspase 1 (Fragment) - <i>Solanum lycopersicum</i> (Tomato) ( <i>Lycopersicon esculentum</i> )              |
| LjT30I08.110.nc      | 271 | comp. | (Q8GSM4) Ovate protein - <i>Solanum lycopersicum</i> (Tomato) ( <i>Lycopersicon esculentum</i> )                         |
| chr2.CM0225.280.nd   | 69  | comp. | (Q5XWR4) Hypothetical protein - <i>Solanum tuberosum</i> (Potato)                                                        |
| LjSGA_026057.1       | 50  | comp. | (Q3HRX9) RUB1 conjugating enzyme-like                                                                                    |
| LjSGA_050210.1       | 63  | comp. | (Q43180) Fumarase (EC 4.2.1.2)                                                                                           |
| LjSGA_060719.2       | 81  | comp. | (Q3HRY8) Hypothetical protein                                                                                            |
| chr1.CM0113.140.nc   | 153 | comp. | (O23957) Dehydrin - <i>Glycine max</i> (Soybean)                                                                         |
| chr1.CM0150.200.nd   | 86  | comp. | (Q9S7N8) Seed maturation protein PM21 (Seed maturation protein PM35) - <i>Glycine max</i> (Soybean)                      |
| chr1.CM0150.210.nd   | 86  | comp. | (Q9S7N8) Seed maturation protein PM21 (Seed maturation protein PM35) - <i>Glycine max</i> (Soybean)                      |
| chr2.CM0011.300.nc   | 119 | comp. | (Q9SEW3) Receptor-like protein kinase (Fragment) - <i>Glycine max</i> (Soybean)                                          |
| chr5.CM0359.80.nc    | 92  | comp. | (Q7PCB2) Putative phytosulfokine peptide precursor - <i>Glycine max</i> (Soybean)                                        |
| LjT36B24.260.nd      | 44  | comp. | (Q949H4) Leaf ubiquitous urease (EC 3.5.1.5) - <i>Glycine max</i> (Soybean)                                              |
| LjSGA_008055.0.1     | 100 | comp. | (O24422) Desiccation protective protein LEA5                                                                             |
| LjSGA_018071.1       | 83  | comp. | (Q9FQD6) Glutathione S-transferase GST 22 (EC 2.5.1.18) (Fragment)                                                       |
| LjSGA_028469.2       | 117 | comp. | (Q5IR71) Zinc finger homeodomain protein SZF-HD2                                                                         |
| LjSGA_031056.1       | 93  | comp. | (Q9FUJ4) Ribulose-1,5-bisphosphate carboxylase small subunit rbcS3                                                       |
| LjSGA_071345.1.1     | 69  | comp. | (Q2PMR3) 50S ribosomal protein L33                                                                                       |

|                    |     |       |                                                                                                |
|--------------------|-----|-------|------------------------------------------------------------------------------------------------|
| LjSGA_098553.1     | 42  | comp. | (Q6T301) Cyclin H (Fragment)                                                                   |
| LjSGA_140901.1     | 53  | comp. | (Q9SPB9) Ubiquitin carrier protein 4                                                           |
| chr5.CM0345.430.nc | 362 | comp. | (Q8NZA4) Streptococcal protective antigen - Streptococcus pyogenes serotype M18                |
| LjSGA_086868.1     | 93  | comp. | (Q4RJS7) Chromosome 9 SCAF15033, whole genome shotgun sequence. (Fragment)                     |
| chr5.CM1125.600.nd | 110 | comp. | (Q41251) Calmodulin-binding heat-shock protein - Nicotiana tabacum (Common tobacco)            |
| LjT31M07.170.nd    | 137 | comp. | (Q84QE6) Photosystem I reaction center subunit X psaK - Nicotiana tabacum (Common tobacco)     |
| LjT41B04.200.nd    | 51  | comp. | (A1KYB2) S-adenosyl-L-homocysteine hydrolase (EC 3.3.1.1) - Nicotiana tabacum (Common tobacco) |
| LjSGA_037274.2.1   | 84  | comp. | (Q84KS0) Auxin-repressed protein-like protein                                                  |
| LjSGA_043736.1     | 104 | comp. | (Q76DX9) AG-motif binding protein-5                                                            |
| LjSGA_059247.1     | 80  | comp. | (Q6R0J1) Heat shock protein 90                                                                 |
| LjSGA_060220.1     | 33  | comp. | (Q45FL8) Ubiquitin extension protein                                                           |
| LjSGA_063791.1     | 71  | comp. | (Q9FR00) Avr9/Cf-9 rapidly elicited protein 31                                                 |
| chr1.CM0284.230.nc | 120 | comp. | (Q95VT2) Histone H2B variant 1 - Toxoplasma gondii                                             |
| LjT44L11.120.nd    | 72  | comp. | (Q8KTP5) Elongation factor G - Tremblaya princeps                                              |
| LjSGA_049956.1.1   | 48  | comp. | (Q2PEQ8) Putative mitochondrial dicarboxylate carrier protein                                  |
| LjSGA_063161.1     | 56  | comp. | (Q2PET8) Putative eukaryotic translation initiation factor 6                                   |
| LjSGA_065523.1     | 78  | comp. | (Q2PEQ5) Hypothetical protein                                                                  |
| LjSGA_107151.1     | 68  | comp. | (Q2PEU8) Hypothetical protein                                                                  |
| LjSGA_143436.1     | 36  | comp. | (Q2PEV4) Putative 60S ribosomal protein L1                                                     |
| chr1.CM0231.280.nc | 209 | comp. | (Q8MTN7) Glutamic acid-rich protein cNBL1700 - Trichinella spiralis (Trichina worm)            |
| chr2.CM0312.190.nc | 204 | comp. | (Q4CY01) Hypothetical protein (Fragment) - Trypanosoma cruzi                                   |
| LjSGA_014215.1.1   | 46  | comp. | (Q4FG34) Ribosomal protein S12 (Fragment)                                                      |
| LjSGA_053374.2     | 46  | comp. | (Q4FG34) Ribosomal protein S12 (Fragment)                                                      |
| LjSGA_076651.0.1   | 46  | comp. | (Q4FG34) Ribosomal protein S12 (Fragment)                                                      |

|                     |     |       |                                                                                                                                                                              |
|---------------------|-----|-------|------------------------------------------------------------------------------------------------------------------------------------------------------------------------------|
| LjSGA_078903.0.1    | 46  | comp. | (Q4FG34) Ribosomal protein S12 (Fragment)                                                                                                                                    |
| LjSGA_080671.2.1    | 46  | comp. | (Q4FG34) Ribosomal protein S12 (Fragment)                                                                                                                                    |
| LjSGA_080693.1      | 46  | comp. | (Q4FG34) Ribosomal protein S12 (Fragment)                                                                                                                                    |
| LjSGA_084172.0.1    | 46  | comp. | (Q4FG34) Ribosomal protein S12 (Fragment)                                                                                                                                    |
| LjSGA_086298.0.1    | 46  | comp. | (Q4FG34) Ribosomal protein S12 (Fragment)                                                                                                                                    |
| LjSGA_096029.1      | 46  | comp. | (Q4FG34) Ribosomal protein S12 (Fragment)                                                                                                                                    |
| LjSGA_101632.0.1    | 46  | comp. | (Q4FG34) Ribosomal protein S12 (Fragment)                                                                                                                                    |
| LjSGA_128850.0.1    | 46  | comp. | (Q4FG34) Ribosomal protein S12 (Fragment)                                                                                                                                    |
| LjSGA_132937.1      | 46  | comp. | (Q4FG34) Ribosomal protein S12 (Fragment)                                                                                                                                    |
| LjSGA_138106.1      | 46  | comp. | (Q4FG34) Ribosomal protein S12 (Fragment)                                                                                                                                    |
| LjSGA_013055.2      | 126 | comp. | (Q43235) NADPH-ferrihemoprotein reductase (EC 1.6.2.4)                                                                                                                       |
| LjSGA_065697.1      | 71  | comp. | (Q9AYM5) CPRD49 protein                                                                                                                                                      |
| chr3.CM0282.840.nc  | 201 | comp. | (Q6TKQ3) Putative ethylene response factor ERF3b - <i>Vitis aestivalis</i> (Grape)                                                                                           |
| LjSGA_010097.2      | 85  | comp. | (Q6YCG3) Wound induced protein-like (Fragment)                                                                                                                               |
| LjSGA_029069.2      | 56  | comp. | (Q9SQK5) Putative sucrose transporter                                                                                                                                        |
| LjSGA_035818.1      | 54  | comp. | (Q6BDD4) Hexose transporter HT2                                                                                                                                              |
| LjSGA_061233.1      | 110 | comp. | (Q2MZW1) Brassinosteroid-6-oxidase                                                                                                                                           |
| LjSGA_106860.1      | 58  | comp. | (Q6BDD4) Hexose transporter HT2                                                                                                                                              |
| chr3.CM0996.200.nc  | 158 | comp. | (Q5DM35) NAC domain transcription factor - <i>Triticum aestivum</i> (Wheat)                                                                                                  |
| LjSGA_132986.1      | 158 | comp. | (Q91594) Cellular nucleic acid binding protein                                                                                                                               |
| chr1.LjT36G06.70.nc | 457 | comp. | (Q6GLB5) ELAV (Embryonic lethal, abnormal vision, <i>Drosophila</i> )-like 1 (Hu antigen R) - <i>Xenopus tropicalis</i> (Western clawed frog) ( <i>Silurana tropicalis</i> ) |
| chr2.CM0074.100.nc  | 351 | comp. | (Q6CG61) Similar to splP31209 <i>Schizosaccharomyces pombe</i> Polyadenylate-binding protein - <i>Yarrowia lipolytica</i> ( <i>Candida lipolytica</i> )                      |
| chr1.CM0113.690.nd  | 135 | comp. | unknown protein                                                                                                                                                              |

|                      |     |         |                                                                                                                                                               |
|----------------------|-----|---------|---------------------------------------------------------------------------------------------------------------------------------------------------------------|
| chr2.CM0338.140.nc   | 59  | comp.   | unknown protein                                                                                                                                               |
| chr3.CM0070.80.nc    | 97  | comp.   | unknown protein                                                                                                                                               |
| chr5.LjT45G21.130.nc | 474 | comp.   | unknown protein                                                                                                                                               |
| LjT01P07.190.nd      | 28  | comp.   | unknown protein                                                                                                                                               |
| LjT11A15.10.nc       | 110 | comp.   | unknown protein                                                                                                                                               |
| LjSGA_017611.1       | 65  | comp.   | unknown protein                                                                                                                                               |
| LjSGA_049240.1       | 111 | comp.   | unknown protein                                                                                                                                               |
| LjSGA_055952.1       | 111 | comp.   | unknown protein                                                                                                                                               |
| LjSGA_056861.1       | 82  | comp.   | unknown protein                                                                                                                                               |
| LjSGA_074189.1       | 192 | comp.   | unknown protein                                                                                                                                               |
| LjSGA_120458.1       | 73  | comp.   | unknown protein                                                                                                                                               |
| LjSGA_142753.1       | 44  | comp.   | unknown protein                                                                                                                                               |
| chr1.CM0001.10.nd    | 58  | partial | (Q8GYP3) Hypothetical protein At2g30280 - Arabidopsis thaliana (Mouse-ear cress)                                                                              |
| chr1.CM0001.50.nd    | 138 | partial | (Q8GYP3) Hypothetical protein At2g30280 - Arabidopsis thaliana (Mouse-ear cress)                                                                              |
| chr1.CM0001.600.nc   | 89  | partial | (Q9SN79) Hypothetical protein F1P2.140 (Hypothetical protein At3g47590) (At3g47590) - Arabidopsis thaliana (Mouse-ear cress)                                  |
| chr1.CM0012.160.nd   | 86  | partial | (Q93VB1) Putative heme oxygenase 1 precursor - Pisum sativum (Garden pea)                                                                                     |
| chr1.CM0012.230.nd   | 90  | partial | (Q9FFS1) GblAAC67354.1 (Hypothetical protein) - Arabidopsis thaliana (Mouse-ear cress)                                                                        |
| chr1.CM0012.660.nd   | 74  | partial | (Q9ZQ93) Hypothetical protein At2g36810 - Arabidopsis thaliana (Mouse-ear cress)                                                                              |
| chr1.CM0016.270.nc   | 47  | partial | (Q8LJS7) Homeodomain protein GhHOX2 - Gossypium hirsutum (Upland cotton)                                                                                      |
| chr1.CM0016.90.nd    | 56  | partial | (Q6YTT3) Putative 3-deoxy-D-arabino-heptulosonate 7-phosphate synthase (Hypothetical protein) (Os08g0484500 protein) - Oryza sativa (japonica cultivar-group) |
| chr1.CM0023.370.nd   | 82  | partial | (Q69JW2) Putative nucleosome/chromatin assembly factor A (Os02g0576700 protein) - Oryza sativa (japonica cultivar-group)                                      |
| chr1.CM0029.270.nd   | 43  | partial | (A3AKX7) Hypothetical protein - Oryza sativa (japonica cultivar-group)                                                                                        |
| chr1.CM0032.380.nd   | 60  | partial | (Q1SQT1) TPR repeat - Medicago truncatula (Barrel medic)                                                                                                      |

|                     |     |         |                                                                                                                       |
|---------------------|-----|---------|-----------------------------------------------------------------------------------------------------------------------|
| chr1.CM0033.1020.nc | 46  | partial | (Q9FI52) Nucleotide-binding protein - Arabidopsis thaliana (Mouse-ear cress)                                          |
| chr1.CM0033.840.nc  | 88  | partial | (Q9CB01) Ara6 (Putative Rab family GTP-binding protein) - Arabidopsis thaliana (Mouse-ear cress)                      |
| chr1.CM0039.40.nd   | 119 | partial | (A3RCC8) Plant U box protein 8 - Arabidopsis thaliana (Mouse-ear cress)                                               |
| chr1.CM0050.30.nc   | 120 | partial | (Q71E52) Cytochrome f (Fragment) - Fagus sylvatica (Beechnut)                                                         |
| chr1.CM0051.130.nc  | 62  | partial | (Q8GZT3) Thioredoxin h - Brassica campestris (Field mustard)                                                          |
| chr1.CM0088.140.nd  | 60  | partial | (Q9LK47) Similarity to 30s ribosomal protein s1 (At3g23700/MYM9_3) - Arabidopsis thaliana (Mouse-ear cress)           |
| chr1.CM0088.200.nd  | 43  | partial | (A3ABL5) Hypothetical protein - Oryza sativa (japonica cultivar-group)                                                |
| chr1.CM0088.490.nd  | 37  | partial | (Q1T3K3) Phytochelatin synthetase-like conserved region; Carbohydrate-binding - Medicago truncatula (Barrel medic)    |
| chr1.CM0094.160.nc  | 58  | partial | (Q9FP19) Putative nucleolar protein family A member 2 (Os06g0274200 protein) - Oryza sativa (japonica cultivar-group) |
| chr1.CM0094.320.nc  | 44  | partial | (Q4W5U7) Calnexin-like protein - Solanum lycopersicum (Tomato) (Lycopersicon esculentum)                              |
| chr1.CM0104.280.nc  | 65  | partial | (Q8LCM4) Trehalose-phosphatase, putative - Arabidopsis thaliana (Mouse-ear cress)                                     |
| chr1.CM0104.390.nd  | 98  | partial | (A2Q5Q7) Not CCR4-Not complex component, N-terminal; tRNA-binding arm - Medicago truncatula (Barrel medic)            |
| chr1.CM0104.50.nd   | 41  | partial | (Q9LEA9) Lipoxygenase (EC 1.13.11.12) - Prunus dulcis (Almond) (Prunus amygdalus)                                     |
| chr1.CM0109.210.nd  | 47  | partial | (Q9LIF1) Glutaredoxin-like protein (Hypothetical protein) - Arabidopsis thaliana (Mouse-ear cress)                    |
| chr1.CM0121.110.nd  | 95  | partial | (Q70SZ7) Aldehyde dehydrogenase - Crocus sativus (Saffron)                                                            |
| chr1.CM0121.180.nd  | 40  | partial | (A3AV07) Hypothetical protein - Oryza sativa (japonica cultivar-group)                                                |
| chr1.CM0122.10.nc   | 32  | partial | (Q0PJD4) MYB transcription factor MYB64 (Fragment) - Glycine max (Soybean)                                            |
| chr1.CM0122.720.nd  | 85  | partial | (A0ZAN2) ATPase - Nodularia spumigena CCY9414                                                                         |
| chr1.CM0122.790.nd  | 112 | partial | (Q3ECB4) Protein At1g77860 - Arabidopsis thaliana (Mouse-ear cress)                                                   |
| chr1.CM0133.790.nd  | 88  | partial | (A3ATU9) Hypothetical protein - Oryza sativa (japonica cultivar-group)                                                |

|                    |     |         |                                                                                                                                                                                    |
|--------------------|-----|---------|------------------------------------------------------------------------------------------------------------------------------------------------------------------------------------|
| chr1.CM0133.830.nd | 125 | partial | (Q1SQK6) Helicase, C-terminal; Argonaute and Dicer protein, PAZ; Type III restriction enzyme, res subunit; Ribonuclease III, bacterial - <i>Medicago truncatula</i> (Barrel medic) |
| chr1.CM0141.500.nd | 49  | partial | (Q1T6P9) Vesicle transport v-SNARE - <i>Medicago truncatula</i> (Barrel medic)                                                                                                     |
| chr1.CM0147.140.nd | 86  | partial | (Q5ZD06) Putative Mal d 1-associated protein (Hypothetical protein) (Os01g0771200 protein) - <i>Oryza sativa</i> (japonica cultivar-group)                                         |
| chr1.CM0147.600.nd | 46  | partial | (Q9LZ94) Eceriferum3 (CER3) - <i>Arabidopsis thaliana</i> (Mouse-ear cress)                                                                                                        |
| chr1.CM0147.720.nc | 156 | partial | (Q9LND3) T21E18.20 protein - <i>Arabidopsis thaliana</i> (Mouse-ear cress)                                                                                                         |
| chr1.CM0163.200.nd | 76  | partial | (A3BGZ2) Hypothetical protein - <i>Oryza sativa</i> (japonica cultivar-group)                                                                                                      |
| chr1.CM0163.260.nd | 87  | partial | (A2YW68) Hypothetical protein - <i>Oryza sativa</i> (indica cultivar-group)                                                                                                        |
| chr1.CM0166.450.nd | 126 | partial | (Q2A9R7) Hypothetical protein - <i>Brassica oleracea</i> (Wild cabbage)                                                                                                            |
| chr1.CM0171.60.nc  | 41  | partial | (A3UE89) Fumarate hydratase (EC 4.2.1.2) - <i>Oceanicaulis alexandrii</i> HTCC2633                                                                                                 |
| chr1.CM0171.620.nd | 81  | partial | (Q2HSK3) Cyclin-like F-box - <i>Medicago truncatula</i> (Barrel medic)                                                                                                             |
| chr1.CM0171.800.nd | 51  | partial | (Q1RSH3) GroEL-like chaperone, ATPase - <i>Medicago truncatula</i> (Barrel medic)                                                                                                  |
| chr1.CM0171.810.nd | 62  | partial | (Q1T3I2) AAA ATPase - <i>Medicago truncatula</i> (Barrel medic)                                                                                                                    |
| chr1.CM0171.860.nd | 76  | partial | (Q1SIS5) Immunoglobulin/major histocompatibility complex; Zinc finger, BED-type predicted; Zinc finger, C2H2-type - <i>Medicago truncatula</i> (Barrel medic)                      |
| chr1.CM0174.160.nc | 55  | partial | (Q0GPF1) BZIP transcription factor bZIP41 - <i>Glycine max</i> (Soybean)                                                                                                           |
| chr1.CM0178.20.nd  | 138 | partial | (Q9SWA8) Glycine-rich RNA-binding protein - <i>Glycine max</i> (Soybean)                                                                                                           |
| chr1.CM0192.30.nd  | 44  | partial | unknown protein                                                                                                                                                                    |
| chr1.CM0195.200.nc | 40  | partial | (Q1RX21) Fibrillarin - <i>Medicago truncatula</i> (Barrel medic)                                                                                                                   |
| chr1.CM0195.70.nd  | 32  | partial | (Q1S1H1) Hypothetical protein - <i>Medicago truncatula</i> (Barrel medic)                                                                                                          |
| chr1.CM0206.980.nd | 44  | partial | (Q84W73) Putative cell division-related protein - <i>Arabidopsis thaliana</i> (Mouse-ear cress)                                                                                    |
| chr1.CM0231.380.nd | 46  | partial | (Q645N1) Mitochondrial malate dehydrogenase - <i>Solanum lycopersicum</i> (Tomato) ( <i>Lycopersicon esculentum</i> )                                                              |
| chr1.CM0231.470.nd | 81  | partial | (A3AKX7) Hypothetical protein - <i>Oryza sativa</i> (japonica cultivar-group)                                                                                                      |
| chr1.CM0231.580.nd | 64  | partial | (O24078) Protein phosphatase 2C - <i>Medicago sativa</i> (Alfalfa)                                                                                                                 |

|                    |     |         |                                                                                                                   |
|--------------------|-----|---------|-------------------------------------------------------------------------------------------------------------------|
| chr1.CM0233.160.nc | 115 | partial | (Q2V3Q7) Protein At3g45310 - Arabidopsis thaliana (Mouse-ear cress)                                               |
| chr1.CM0248.380.nd | 129 | partial | (Q2HUN6) RNA-directed DNA polymerase (Reverse transcriptase); Ribonuclease H - Medicago truncatula (Barrel medic) |
| chr1.CM0269.340.nc | 44  | partial | (Q6EM96) Ribosomal protein S7 - Euptelea polyandra                                                                |
| chr1.CM0269.370.nd | 54  | partial | (Q5SMZ1) Aldose 1-epimerase-like (Hypothetical protein) - Oryza sativa (japonica cultivar-group)                  |
| chr1.CM0275.180.nd | 384 | partial | (Q9FX45) RNA-binding glycine-rich protein, putative (At1g73530) - Arabidopsis thaliana (Mouse-ear cress)          |
| chr1.CM0284.330.nd | 43  | partial | (A2Y368) Hypothetical protein - Oryza sativa (indica cultivar-group)                                              |
| chr1.CM0289.130.nd | 95  | partial | (Q0JDM5) Os04g0393300 protein - Oryza sativa (japonica cultivar-group)                                            |
| chr1.CM0289.210.nc | 107 | partial | (A3AM99) Hypothetical protein - Oryza sativa (japonica cultivar-group)                                            |
| chr1.CM0289.410.nc | 35  | partial | (Q9LTR4) Similarity to EH domain containing proteins - Arabidopsis thaliana (Mouse-ear cress)                     |
| chr1.CM0295.670.nc | 57  | partial | (A3ACJ3) Hypothetical protein - Oryza sativa (japonica cultivar-group)                                            |
| chr1.CM0295.740.nd | 73  | partial | (Q337L2) TPR Domain containing protein, expressed (Os10g0471400 protein) - Oryza sativa (japonica cultivar-group) |
| chr1.CM0295.950.nc | 49  | partial | (Q4A185) Beclin 1 protein - Medicago truncatula (Barrel medic)                                                    |
| chr1.CM0295.990.nc | 185 | partial | (A3AA74) Hypothetical protein - Oryza sativa (japonica cultivar-group)                                            |
| chr1.CM0315.390.nc | 70  | partial | (Q1SD50) Semialdehyde dehydrogenase, NAD-binding - Medicago truncatula (Barrel medic)                             |
| chr1.CM0318.460.nc | 62  | partial | (O04521) F20P5.3 protein - Arabidopsis thaliana (Mouse-ear cress)                                                 |
| chr1.CM0318.610.nd | 47  | partial | (Q570J3) Adenylosuccinate synthetase (Fragment) - Arabidopsis thaliana (Mouse-ear cress)                          |
| chr1.CM0320.290.nd | 84  | partial | (Q9T0I3) Hypothetical protein AT4g38750 - Arabidopsis thaliana (Mouse-ear cress)                                  |
| chr1.CM0361.280.nd | 57  | partial | (Q0JGZ1) Os01g0895100 protein (Hypothetical protein) - Oryza sativa (japonica cultivar-group)                     |
| chr1.CM0375.150.nd | 90  | partial | (A2XLW4) Hypothetical protein - Oryza sativa (indica cultivar-group)                                              |
| chr1.CM0375.30.nd  | 79  | partial | unknown protein                                                                                                   |
| chr1.CM0375.320.nd | 341 | partial | (Q9AT21) Histone H1 (Fragment) - Lathyrus sativus (Chickling vetch)                                               |
| chr1.CM0375.410.nc | 37  | partial | (Q2PES9) Putative tetrahydrofolate synthase - Trifolium pratense (Red clover)                                     |

|                    |     |         |                                                                                                                                                |
|--------------------|-----|---------|------------------------------------------------------------------------------------------------------------------------------------------------|
| chr1.CM0375.420.nc | 68  | partial | (Q2HVK9) Tetrahydrofolate dehydrogenase/cyclohydrolase - Medicago truncatula (Barrel medic)                                                    |
| chr1.CM0393.270.nd | 106 | partial | (Q9SIW2) Hypothetical protein At2g16390 - Arabidopsis thaliana (Mouse-ear cress)                                                               |
| chr1.CM0393.370.nd | 61  | partial | (Q9LPF6) T12C22.2 protein (Hypothetical protein At1g44750) (Hypothetical protein At1g44750; T12C22.2) - Arabidopsis thaliana (Mouse-ear cress) |
| chr1.CM0393.400.nd | 55  | partial | (Q9SLR7) Thiamin biosynthetic enzyme - Glycine max (Soybean)                                                                                   |
| chr1.CM0476.310.nd | 104 | partial | (Q1RT77) Zinc finger, CCCH-type - Medicago truncatula (Barrel medic)                                                                           |
| chr1.CM0476.60.nd  | 36  | partial | (A3B6B9) Hypothetical protein - Oryza sativa (japonica cultivar-group)                                                                         |
| chr1.CM0544.260.nc | 47  | partial | (Q8L833) Putative carbonic anhydrase - Arabidopsis thaliana (Mouse-ear cress)                                                                  |
| chr1.CM0579.110.nd | 81  | partial | (Q53YG9) At3g51130/F24M12_170 - Arabidopsis thaliana (Mouse-ear cress)                                                                         |
| chr1.CM0591.490.nd | 66  | partial | (Q0VJB4) Putative zinc-binding protein - Platanus acerifolia (London plane tree)                                                               |
| chr1.CM0591.500.nd | 90  | partial | (A2XLW4) Hypothetical protein - Oryza sativa (indica cultivar-group)                                                                           |
| chr1.CM0593.510.nd | 43  | partial | (Q1SMQ9) Calcium-binding EF-hand; Adenine nucleotide translocator 1 - Medicago truncatula (Barrel medic)                                       |
| chr1.CM0600.20.nd  | 46  | partial | (Q9M838) T27C4.14 protein - Arabidopsis thaliana (Mouse-ear cress)                                                                             |
| chr1.CM0600.220.nd | 41  | partial | (A3BBX0) Hypothetical protein - Oryza sativa (japonica cultivar-group)                                                                         |
| chr1.CM0600.390.nd | 42  | partial | (Q9C4Z6) Guanine nucleotide-binding protein, putative (Putative guanine nucleotide-binding protein) - Arabidopsis thaliana (Mouse-ear cress)   |
| chr1.CM0668.20.nd  | 42  | partial | (A0IIU4) Catalase-like (EC 1.11.1.6) - Serratia proteamaculans 568                                                                             |
| chr1.CM0668.220.nd | 122 | partial | (A2XPE5) Hypothetical protein - Oryza sativa (indica cultivar-group)                                                                           |
| chr1.CM0794.170.nd | 94  | partial | (A3BR06) Hypothetical protein - Oryza sativa (japonica cultivar-group)                                                                         |
| chr1.CM0800.100.nd | 58  | partial | (Q06XS4) Putative calcium-dependent protein kinase 2 - Isatis tinctoria (Dyer's woad) (Isatis indigotica)                                      |
| chr1.CM0800.540.nd | 87  | partial | (Q6TK49) RNA polymerase beta subunit (Fragment) - Ecballium elaterium (Jumping cucumber)                                                       |
| chr1.CM0982.240.nd | 160 | partial | (Q9P127) Leucine zipper protein 4 - Homo sapiens (Human)                                                                                       |
| chr1.CM0982.360.nd | 45  | partial | (Q75ZE1) 14-3-3 d-2-AS protein - Nicotiana tabacum (Common tobacco)                                                                            |



|                      |     |         |                                                                                                                                             |
|----------------------|-----|---------|---------------------------------------------------------------------------------------------------------------------------------------------|
| chr1.CM0982.40.nd    | 63  | partial | (Q9LTA2) Similarity to AT-hook DNA-binding protein (AT-hook motif nuclear localized protein 17) - Arabidopsis thaliana (Mouse-ear cress)    |
| chr1.CM1413.170.nd   | 49  | partial | (O82341) Eukaryotic translation initiation factor 3 delta subunit - Arabidopsis thaliana (Mouse-ear cress)                                  |
| chr1.CM1875.40.nc    | 43  | partial | (Q5K3W0) Monosaccharide transporter - Populus tremula x Populus tremuloides                                                                 |
| chr1.LjT01D01.50.nd  | 164 | partial | (Q6NME0) At1g79140 - Arabidopsis thaliana (Mouse-ear cress)                                                                                 |
| chr1.LjT01M20.40.nc  | 28  | partial | (Q1SG03) Zinc finger, RING-type; Zinc finger, PHD-type - Medicago truncatula (Barrel medic)                                                 |
| chr1.LjT04O21.80.nd  | 190 | partial | (A3CIU0) Hypothetical protein - Oryza sativa (japonica cultivar-group)                                                                      |
| chr1.LjT06I14.100.nc | 71  | partial | (O23944) Cystathionine gamma synthase - Fragaria vesca (Woodland strawberry)                                                                |
| chr1.LjT08H21.110.nd | 62  | partial | (Q6RIB7) Enolase (EC 2.3.1.16) - Glycine max (Soybean)                                                                                      |
| chr1.LjT08H21.130.nd | 43  | partial | unknown protein                                                                                                                             |
| chr1.LjT14B18.210.nc | 104 | partial | (Q1SZG7) Zinc finger, B-box; CCT - Medicago truncatula (Barrel medic)                                                                       |
| chr1.LjT14I13.100.nd | 49  | partial | (Q7X6U9) OSJNBb0034G17.1 protein (Hypothetical protein) - Oryza sativa (japonica cultivar-group)                                            |
| chr1.LjT14I13.200.nd | 45  | partial | (Q9M461) Plasma membrane H <sup>+</sup> ATPase (EC 3.6.1.3) - Prunus persica (Peach)                                                        |
| chr1.LjT14I13.50.nd  | 72  | partial | (Q1RSQ9) Phosphotransferase KptA/Tpt1 - Medicago truncatula (Barrel medic)                                                                  |
| chr1.LjT16B05.160.nd | 41  | partial | (O04326) T02O04.20 protein (Hypothetical protein At3g16310) (Hypothetical protein) (GblAAB63646.1) - Arabidopsis thaliana (Mouse-ear cress) |
| chr1.LjT16O03.110.nd | 24  | partial | (Q7XUP4) OSJNBb0011N17.19 protein (Os04g0482700 protein) - Oryza sativa (japonica cultivar-group)                                           |
| chr1.LjT23O20.20.nd  | 100 | partial | (Q45NK3) Hypothetical protein (Fragment) - Medicago sativa (Alfalfa)                                                                        |
| chr1.LjT27C19.180.nd | 51  | partial | (Q9SCV6) Putative beta-galactosidase precursor (EC 3.2.1.23) - Arabidopsis thaliana (Mouse-ear cress)                                       |
| chr1.LjT29L06.230.nd | 31  | partial | (Q1RSS0) Universal stress protein (Usp) - Medicago truncatula (Barrel medic)                                                                |
| chr1.LjT32B13.20.nd  | 68  | partial | unknown protein                                                                                                                             |
| chr1.LjT34C24.10.nc  | 88  | partial | (Q2HTR2) Cyclin-like F-box - Medicago truncatula (Barrel medic)                                                                             |

|                      |     |         |                                                                                                                          |
|----------------------|-----|---------|--------------------------------------------------------------------------------------------------------------------------|
| chr1.LjT34H22.110.nd | 84  | partial | (Q9FZ10) Serine threonine kinase homolog COK-4 - Phaseolus vulgaris (Kidney bean) (French bean)                          |
| chr1.LjT34H22.140.nd | 82  | partial | (A2XHZ3) Hypothetical protein - Oryza sativa (indica cultivar-group)                                                     |
| chr1.LjT34H22.200.nd | 153 | partial | (Q69F86) Serine-threonine kinase - Phaseolus vulgaris (Kidney bean) (French bean)                                        |
| chr1.LjT34H22.80.nd  | 71  | partial | (Q9LLC9) Fen kinase - Solanum lycopersicum (Tomato) (Lycopersicon esculentum)                                            |
| chr1.LjT35H06.100.nc | 471 | partial | (Q0YGL9) Hypothetical protein - Geobacter sp. FRC-32                                                                     |
| chr1.LjT36F23.140.nd | 159 | partial | (Q9LRX7) Phosphatidylinositol/phosphatidylcholine transfer protein-like - Arabidopsis thaliana (Mouse-ear cress)         |
| chr1.LjT36G06.120.nc | 26  | partial | (Q5EE13) Calcineurin B-like protein (Calcineurin B-like protein 1) - Ammopiptanthus mongolicus                           |
| chr1.LjT36I17.10.nd  | 73  | partial | (A1L4U4) At5g64300 - Arabidopsis thaliana (Mouse-ear cress)                                                              |
| chr1.LjT36P09.110.nd | 58  | partial | (Q1RSC2) Pentatricopeptide repeat - Medicago truncatula (Barrel medic)                                                   |
| chr1.LjT36P09.140.nd | 65  | partial | (A3BER2) Hypothetical protein - Oryza sativa (japonica cultivar-group)                                                   |
| chr1.LjT37A17.80.nc  | 53  | partial | (Q0PY49) CCR4 associated factor 1-related protein - Capsicum annuum (Bell pepper)                                        |
| chr1.LjT38A19.170.nc | 20  | partial | (Q9SPI7) Actin - Picea rubens (Red spruce)                                                                               |
| chr1.LjT38A19.20.nc  | 34  | partial | (A3BXM3) Hypothetical protein - Oryza sativa (japonica cultivar-group)                                                   |
| chr1.LjT38G13.70.nd  | 71  | partial | (Q9SLG8) Putative strictosidine synthase - Arabidopsis thaliana (Mouse-ear cress)                                        |
| chr1.LjT41E18.120.nc | 45  | partial | (A2ZQ76) Hypothetical protein - Oryza sativa (japonica cultivar-group)                                                   |
| chr1.LjT41J07.140.nd | 38  | partial | (Q1SGV7) Transcriptional factor B3; Auxin response factor; Aux/IAA_ARF_dimerisation - Medicago truncatula (Barrel medic) |
| chr1.LjT43D18.50.nd  | 85  | partial | (Q1S126) Hypothetical protein - Medicago truncatula (Barrel medic)                                                       |
| chr1.LjT43O05.230.nd | 65  | partial | (Q43016) Alcohol dehydrogenase-1F (EC 1.1.1.1) - Phaseolus acutifolius (Tepary bean)                                     |
| chr1.LjT43O05.310.nd | 45  | partial | (A2ZR99) Hypothetical protein - Oryza sativa (japonica cultivar-group)                                                   |
| chr1.LjT44L17.120.nd | 59  | partial | (A2WX55) Hypothetical protein - Oryza sativa (indica cultivar-group)                                                     |
| chr1.LjT44L17.30.nd  | 56  | partial | (Q547P9) Copper transporter COPT1 (Copper transport protein) - Arabidopsis thaliana (Mouse-ear cress)                    |

|                     |     |         |                                                                                                           |
|---------------------|-----|---------|-----------------------------------------------------------------------------------------------------------|
| chr1.LjT48M07.90.nc | 29  | partial | (Q1SVD9) Pyridoxal-5-phosphate-dependent enzyme, beta subunit - <i>Medicago truncatula</i> (Barrel medic) |
| chr2.CM0002.340.nd  | 59  | partial | (Q9FFF9) Meiotic check point regulator-like protein - <i>Arabidopsis thaliana</i> (Mouse-ear cress)       |
| chr2.CM0008.100.nd  | 53  | partial | (Q1PG92) Carbonic anhydrase (Fragment) - <i>Striga asiatica</i>                                           |
| chr2.CM0008.110.nd  | 37  | partial | (A1XX45) Chloroplast carbonic anhydrase - <i>Pachysandra terminalis</i>                                   |
| chr2.CM0008.30.nd   | 94  | partial | (Q6NKP9) Hypothetical protein At1g10600 - <i>Arabidopsis thaliana</i> (Mouse-ear cress)                   |
| chr2.CM0008.490.nc  | 41  | partial | (A0MWE6) Na <sup>+</sup> /Pi transporter - <i>Thellungiella halophila</i> (Salt cress)                    |
| chr2.CM0008.500.nc  | 71  | partial | (Q1S106) Exostosin-like - <i>Medicago truncatula</i> (Barrel medic)                                       |
| chr2.CM0008.520.nc  | 72  | partial | (Q1RWY8) P-type trefoil - <i>Medicago truncatula</i> (Barrel medic)                                       |
| chr2.CM0011.370.nd  | 89  | partial | (Q9ZTT3) Subtilisin-like protease C1 - <i>Glycine max</i> (Soybean)                                       |
| chr2.CM0018.210.nd  | 58  | partial | (Q2TM26) STO-1 - <i>Coffea canephora</i> (Robusta coffee)                                                 |
| chr2.CM0018.420.nd  | 51  | partial | (Q8S3S8) Putative histidinol phosphate aminotransferase - <i>Oryza sativa</i> (japonica cultivar-group)   |
| chr2.CM0018.720.nc  | 68  | partial | (Q6ZBP3) Putative Histone H2B.2 (Hypothetical protein) - <i>Oryza sativa</i> (japonica cultivar-group)    |
| chr2.CM0021.1180.nd | 61  | partial | (Q9LPJ1) F6N18.11 (Hypothetical protein) - <i>Arabidopsis thaliana</i> (Mouse-ear cress)                  |
| chr2.CM0021.130.nd  | 88  | partial | (Q9FHP1) Uridyl transferases-like (ACR1) - <i>Arabidopsis thaliana</i> (Mouse-ear cress)                  |
| chr2.CM0021.480.nc  | 50  | partial | (Q8H6V8) Urease JBURE-II - <i>Canavalia ensiformis</i> (Jack bean) (Horse bean)                           |
| chr2.CM0028.240.nd  | 81  | partial | (A1A6I1) At1g69980 - <i>Arabidopsis thaliana</i> (Mouse-ear cress)                                        |
| chr2.CM0031.250.nc  | 56  | partial | (Q1SXM4) Leucine-rich repeat, plant specific - <i>Medicago truncatula</i> (Barrel medic)                  |
| chr2.CM0056.230.nd  | 73  | partial | (Q9FL09) Nodulin-like protein - <i>Arabidopsis thaliana</i> (Mouse-ear cress)                             |
| chr2.CM0056.30.nd   | 93  | partial | (Q9M381) DIPHOSPHOMEVALONATE DECARBOXYLASE-like protein - <i>Arabidopsis thaliana</i> (Mouse-ear cress)   |
| chr2.CM0056.520.nd  | 58  | partial | (Q9FLS5) GblAAC80624.1 (NpGUT1 homolog) - <i>Arabidopsis thaliana</i> (Mouse-ear cress)                   |
| chr2.CM0056.60.nd   | 104 | partial | (Q9T0K5) Extensin-like protein - <i>Arabidopsis thaliana</i> (Mouse-ear cress)                            |
| chr2.CM0056.630.nd  | 46  | partial | (Q6H975) STY-L protein - <i>Antirrhinum majus</i> (Garden snapdragon)                                     |
| chr2.CM0056.70.nd   | 49  | partial | (Q9FSF5) Cysteine synthase - <i>Nicotiana tabacum</i> (Common tobacco)                                    |

|                    |     |         |                                                                                                                                                                                      |
|--------------------|-----|---------|--------------------------------------------------------------------------------------------------------------------------------------------------------------------------------------|
| chr2.CM0056.740.nd | 69  | partial | (Q6K456) Putative plastid protein (Hypothetical protein) (Os09g0132600 protein) - <i>Oryza sativa</i> (japonica cultivar-group)                                                      |
| chr2.CM0058.160.nc | 44  | partial | (Q8GWL2) Hypothetical protein At2g30270 - <i>Arabidopsis thaliana</i> (Mouse-ear cress)                                                                                              |
| chr2.CM0065.50.nd  | 99  | partial | (Q1SND5) Protein kinase - <i>Medicago truncatula</i> (Barrel medic)                                                                                                                  |
| chr2.CM0067.170.nc | 48  | partial | (Q2QME5) Eukaryotic translation initiation factor 2 gamma subunit, putative, expressed (Hypothetical protein) (Os12g0607100 protein) - <i>Oryza sativa</i> (japonica cultivar-group) |
| chr2.CM0102.290.nd | 109 | partial | (Q7XUB7) OSJNBb0078D11.11 protein - <i>Oryza sativa</i> (japonica cultivar-group)                                                                                                    |
| chr2.CM0102.590.nd | 77  | partial | (Q9LHJ2) UDP-glucose glucosyltransferase-like protein - <i>Arabidopsis thaliana</i> (Mouse-ear cress)                                                                                |
| chr2.CM0102.630.nd | 175 | partial | (O65503) Hypothetical protein F23E12.200 (Hypothetical protein AT4g35240) - <i>Arabidopsis thaliana</i> (Mouse-ear cress)                                                            |
| chr2.CM0120.60.nc  | 71  | partial | (Q1SBM2) Putative methyltransferase, putative - <i>Medicago truncatula</i> (Barrel medic)                                                                                            |
| chr2.CM0120.70.nc  | 52  | partial | (Q9S7D7) Putative RNA-binding protein; 24808-23340 (Putative RNA-binding protein; 16955-18423) - <i>Arabidopsis thaliana</i> (Mouse-ear cress)                                       |
| chr2.CM0124.200.nd | 60  | partial | (A3B2W3) Hypothetical protein - <i>Oryza sativa</i> (japonica cultivar-group)                                                                                                        |
| chr2.CM0124.650.nd | 57  | partial | (P93570) Chaperonin-60 beta subunit precursor - <i>Solanum tuberosum</i> (Potato)                                                                                                    |
| chr2.CM0124.670.nd | 65  | partial | (A3BY78) Hypothetical protein - <i>Oryza sativa</i> (japonica cultivar-group)                                                                                                        |
| chr2.CM0177.510.nc | 76  | partial | (Q09FY5) Hypothetical chloroplast RF2 - <i>Platanus occidentalis</i> (Sycamore)                                                                                                      |
| chr2.CM0191.540.nc | 42  | partial | (Q9LKJ2) Cytosolic phosphoglycerate kinase - <i>Pisum sativum</i> (Garden pea)                                                                                                       |
| chr2.CM0191.620.nc | 79  | partial | (Q84K92) Hypothetical protein (Fragment) - <i>Arabidopsis lyrata</i> (Lyre-leaved rock-cress)                                                                                        |
| chr2.CM0201.140.nd | 76  | partial | (Q8VYF9) Hypothetical protein At3g01720 - <i>Arabidopsis thaliana</i> (Mouse-ear cress)                                                                                              |
| chr2.CM0201.60.nd  | 79  | partial | (A2Q532) Transcriptional factor B3; Auxin response factor - <i>Medicago truncatula</i> (Barrel medic)                                                                                |
| chr2.CM0210.160.nc | 95  | partial | (Q70SZ7) Aldehyde dehydrogenase - <i>Crocus sativus</i> (Saffron)                                                                                                                    |
| chr2.CM0210.90.nc  | 66  | partial | (A3BAZ3) Hypothetical protein - <i>Oryza sativa</i> (japonica cultivar-group)                                                                                                        |
| chr2.CM0237.20.nd  | 65  | partial | (Q9LKB9) Myosin heavy chain MYA2 - <i>Arabidopsis thaliana</i> (Mouse-ear cress)                                                                                                     |
| chr2.CM0237.210.nd | 51  | partial | (Q84ND6) Cation diffusion facilitator 8 - <i>Stylosanthes hamata</i> (Caribbean stylo)                                                                                               |
| chr2.CM0237.250.nd | 49  | partial | (Q5EMN3) CRABS CLAW - <i>Nicotiana tabacum</i> (Common tobacco)                                                                                                                      |

|                    |     |         |                                                                                                                                      |
|--------------------|-----|---------|--------------------------------------------------------------------------------------------------------------------------------------|
| chr2.CM0237.50.nd  | 62  | partial | (A3ACP3) Hypothetical protein - <i>Oryza sativa</i> (japonica cultivar-group)                                                        |
| chr2.CM0249.700.nd | 37  | partial | (Q9C7X9) Peptide chain release factor 2, putative - <i>Arabidopsis thaliana</i> (Mouse-ear cress)                                    |
| chr2.CM0249.820.nd | 71  | partial | (Q9FJZ5) Genomic DNA, chromosome 5, TAC clone:K1F13 (Hypothetical protein At5g66440) - <i>Arabidopsis thaliana</i> (Mouse-ear cress) |
| chr2.CM0249.860.nd | 57  | partial | unknown protein                                                                                                                      |
| chr2.CM0249.900.nd | 83  | partial | (Q9FJZ5) Genomic DNA, chromosome 5, TAC clone:K1F13 (Hypothetical protein At5g66440) - <i>Arabidopsis thaliana</i> (Mouse-ear cress) |
| chr2.CM0272.10.nd  | 82  | partial | (Q1SAF9) Mov34/MPN/PAD-1 (Mov34-1) - <i>Medicago truncatula</i> (Barrel medic)                                                       |
| chr2.CM0304.540.nd | 81  | partial | (Q1SB83) E-class P450, group I - <i>Medicago truncatula</i> (Barrel medic)                                                           |
| chr2.CM0310.230.nd | 69  | partial | (Q1T3I5) Hypothetical protein - <i>Medicago truncatula</i> (Barrel medic)                                                            |
| chr2.CM0310.250.nd | 56  | partial | (Q06QU5) Potential heme-binding protein - <i>Menodora longiflora</i>                                                                 |
| chr2.CM0310.280.nd | 42  | partial | (A3BUD4) Hypothetical protein - <i>Oryza sativa</i> (japonica cultivar-group)                                                        |
| chr2.CM0360.200.nd | 58  | partial | (Q7XVT5) OSJNBa0041M21.1 protein - <i>Oryza sativa</i> (japonica cultivar-group)                                                     |
| chr2.CM0373.220.nd | 65  | partial | (A2Z485) Hypothetical protein - <i>Oryza sativa</i> (indica cultivar-group)                                                          |
| chr2.CM0373.40.nd  | 51  | partial | (Q1S2V6) Mitochondrial carrier protein - <i>Medicago truncatula</i> (Barrel medic)                                                   |
| chr2.CM0373.410.nc | 59  | partial | (A3AGK1) Hypothetical protein - <i>Oryza sativa</i> (japonica cultivar-group)                                                        |
| chr2.CM0405.40.nd  | 119 | partial | (Q1S9B3) Ribosomal protein L6E; Ribosomal protein L6, N-terminal - <i>Medicago truncatula</i> (Barrel medic)                         |
| chr2.CM0504.200.nd | 67  | partial | (Q1S4F9) Leucine-rich-associated - <i>Medicago truncatula</i> (Barrel medic)                                                         |
| chr2.CM0608.270.nd | 45  | partial | (Q6E6L3) 5-enol-pyruvylshikimate-phosphate synthase (Fragment) - <i>Conyza canadensis</i> (Canadian horseweed)                       |
| chr2.CM0608.280.nd | 46  | partial | (Q1T2M0) RNA polymerase subunit, RPB5; RNA polymerase Rpb5, N-terminal - <i>Medicago truncatula</i> (Barrel medic)                   |
| chr2.CM0641.10.nc  | 23  | partial | (A1Z3W7) EIF5A - <i>Rosa chinensis</i> (China rose)                                                                                  |
| chr2.CM0749.210.nd | 40  | partial | (Q7PCB3) Putative phytosulfokine peptide (Fragment) - <i>Glycine max</i> (Soybean)                                                   |
| chr2.CM0783.170.nd | 49  | partial | (Q7Y228) At5g19740 - <i>Arabidopsis thaliana</i> (Mouse-ear cress)                                                                   |

|                      |     |         |                                                                                                                                               |
|----------------------|-----|---------|-----------------------------------------------------------------------------------------------------------------------------------------------|
| chr2.CM0783.180.nd   | 31  | partial | (Q2V3W8) Protein At3g12100 - Arabidopsis thaliana (Mouse-ear cress)                                                                           |
| chr2.CM0788.100.nc   | 34  | partial | (Q10PH1) Ubiquitin fusion protein, putative, expressed (Hypothetical protein) (Os03g0234200 protein) - Oryza sativa (japonica cultivar-group) |
| chr2.CM0788.180.nc   | 36  | partial | (Q45NM7) Histidyl-tRNA synthetase (Fragment) - Medicago sativa (Alfalfa)                                                                      |
| chr2.CM0788.190.nc   | 59  | partial | (Q1S7R4) Protein kinase - Medicago truncatula (Barrel medic)                                                                                  |
| chr2.CM0788.340.nd   | 74  | partial | (A2WWI1) Hypothetical protein - Oryza sativa (indica cultivar-group)                                                                          |
| chr2.CM0803.530.nc   | 48  | partial | (Q39852) Putative ATP synthase subunit - Glycine max (Soybean)                                                                                |
| chr2.CM0803.880.nd   | 34  | partial | (A3AWV1) Hypothetical protein - Oryza sativa (japonica cultivar-group)                                                                        |
| chr2.CM0826.350.nd   | 72  | partial | (Q1RTI3) Glycosyl transferase, family 20; Trehalose-phosphatase - Medicago truncatula (Barrel medic)                                          |
| chr2.CM0826.40.nc    | 75  | partial | (Q1SIP0) Ribose-phosphate pyrophosphokinase - Medicago truncatula (Barrel medic)                                                              |
| chr2.CM0904.270.nd   | 32  | partial | (Q93WW2) Hypothetical protein (Fragment) - Musa acuminata (Banana)                                                                            |
| chr2.CM0904.310.nd   | 33  | partial | (Q1H386) ATP-dependent metalloprotease FtsH (EC 3.6.4.6) - Methylobacillus flagellatus (strain KT / ATCC 51484 / DSM 6875)                    |
| chr2.CM1032.360.nc   | 707 | partial | (A2Q4W6) RNA-binding region RNP-1 (RNA recognition motif) - Medicago truncatula (Barrel medic)                                                |
| chr2.CM1150.20.nd    | 59  | partial | (Q9FNY4) DNA polymerase lambda - Arabidopsis thaliana (Mouse-ear cress)                                                                       |
| chr2.CM1150.260.nd   | 54  | partial | (A2Q5N5) Protein kinase (Fragment) - Medicago truncatula (Barrel medic)                                                                       |
| chr2.LjB26H15.10.nc  | 172 | partial | (Q197X9) Heterogeneous nuclear ribonucleoprotein G - Haplochromis burtoni (Burton's mouthbrooder)                                             |
| chr2.LjT02E02.100.nd | 53  | partial | (Q647J9) Homogentisate phytylprenyltransferase - Medicago sativa (Alfalfa)                                                                    |
| chr2.LjT02E02.120.nd | 47  | partial | (Q647J9) Homogentisate phytylprenyltransferase - Medicago sativa (Alfalfa)                                                                    |
| chr2.LjT02E02.150.nd | 45  | partial | (Q58FG4) Homogentisate phytylprenyltransferase - Glycine max (Soybean)                                                                        |
| chr2.LjT09A09.50.nd  | 33  | partial | (Q9FRY6) Uricase - Lotus japonicus                                                                                                            |
| chr2.LjT13M01.90.nd  | 51  | partial | (Q9FIU5) Serine/threonine-specific protein kinase-like protein - Arabidopsis thaliana (Mouse-ear cress)                                       |

|                      |     |         |                                                                                                             |
|----------------------|-----|---------|-------------------------------------------------------------------------------------------------------------|
| chr2.LjT13P17.40.nd  | 62  | partial | (Q4FH87) Dehydration responsive element-binding protein 3 - Glycine max (Soybean)                           |
| chr2.LjT17A07.220.nd | 24  | partial | (A3BTD3) Hypothetical protein - Oryza sativa (japonica cultivar-group)                                      |
| chr2.LjT24P12.180.nd | 56  | partial | (Q9LIN8) Similarity to alpha galactosidase - Arabidopsis thaliana (Mouse-ear cress)                         |
| chr2.LjT24P12.80.nd  | 51  | partial | (Q5QLK3) Putative alpha-galactosidase (Os01g0518500 protein) - Oryza sativa (japonica cultivar-group)       |
| chr2.LjT34P04.170.nd | 69  | partial | (A0D0A0) Chromosome undetermined scaffold_33, whole genome shotgun sequence - Paramecium tetraurelia        |
| chr2.LjT34P04.60.nd  | 59  | partial | (A2TKE7) Ubiquitin-like protein (Fragment) - Pisum sativum (Garden pea)                                     |
| chr2.LjT36E17.30.nd  | 170 | partial | (Q5XWM2) No apical meristem (NAM) family protein-like - Solanum tuberosum (Potato)                          |
| chr2.LjT40P05.100.nd | 89  | partial | (Q2HVVU7) Sodium/hydrogen exchanger - Medicago truncatula (Barrel medic)                                    |
| chr2.LjT41F02.100.nc | 106 | partial | (Q1S1H9) Hypothetical protein - Medicago truncatula (Barrel medic)                                          |
| chr2.LjT42I05.130.nd | 48  | partial | (Q5ZJ35) Hypothetical protein - Gallus gallus (Chicken)                                                     |
| chr2.LjT42I05.40.nd  | 41  | partial | (Q9M9H4) F14O23.10 protein - Arabidopsis thaliana (Mouse-ear cress)                                         |
| chr2.LjT44M20.320.nd | 46  | partial | (Q84W73) Putative cell division-related protein - Arabidopsis thaliana (Mouse-ear cress)                    |
| chr2.LjT45I07.100.nd | 68  | partial | (Q0WR55) GPI-anchored protein (Fragment) - Arabidopsis thaliana (Mouse-ear cress)                           |
| chr2.LjT46G02.160.nd | 24  | partial | (Q9M5M5) 60S acidic ribosomal protein PO (Fragment) - Euphorbia esula (Leafy spurge)                        |
| chr2.LjT46G02.270.nd | 27  | partial | (Q9FQ21) Putative Hs1pro-1-like receptor - Glycine max (Soybean)                                            |
| chr2.LjT46G02.40.nd  | 61  | partial | (Q9M5M5) 60S acidic ribosomal protein PO (Fragment) - Euphorbia esula (Leafy spurge)                        |
| chr2.LjT48A12.150.nd | 85  | partial | (Q9SUA2) Sucrase-like protein - Arabidopsis thaliana (Mouse-ear cress)                                      |
| chr3.CM0005.170.nd   | 84  | partial | (A2WNG7) Hypothetical protein - Oryza sativa (indica cultivar-group)                                        |
| chr3.CM0005.230.nd   | 52  | partial | (Q1SPA4) SAM (And some other nucleotide) binding motif - Medicago truncatula (Barrel medic)                 |
| chr3.CM0005.240.nd   | 87  | partial | (A2ZR00) Hypothetical protein - Oryza sativa (japonica cultivar-group)                                      |
| chr3.CM0047.260.nc   | 64  | partial | (Q4FFZ4) Ribosomal protein S11 (Fragment) - Nuphar advena (Common spatterdock) (Nuphar lutea subsp. advena) |
| chr3.CM0047.520.nc   | 178 | partial | (Q8RWD7) Hypothetical protein At1g58210 - Arabidopsis thaliana (Mouse-ear cress)                            |

|                    |     |         |                                                                                                                                                |
|--------------------|-----|---------|------------------------------------------------------------------------------------------------------------------------------------------------|
| chr3.CM0059.330.nd | 72  | partial | (Q9XIQ7) F13O11.19 protein (Hypothetical protein At1g64890) - Arabidopsis thaliana (Mouse-ear cress)                                           |
| chr3.CM0091.180.nc | 48  | partial | (A3CCC8) Hypothetical protein - Oryza sativa (japonica cultivar-group)                                                                         |
| chr3.CM0106.20.nd  | 33  | partial | (Q1SZL0) Leucine-rich repeat - Medicago truncatula (Barrel medic)                                                                              |
| chr3.CM0106.520.nd | 139 | partial | (A4GYV4) Ycf2 - Populus trichocarpa (Western balsam poplar)                                                                                    |
| chr3.CM0106.530.nd | 62  | partial | (Q1SSB0) Adenine nucleotide translocator 1 - Medicago truncatula (Barrel medic)                                                                |
| chr3.CM0110.420.nd | 90  | partial | (Q8GXX0) Hypothetical protein At1g49880/F10F5_3 (Mitochondrial sulfhydryl oxidase Erv1p) (At1g49880) - Arabidopsis thaliana (Mouse-ear cress)  |
| chr3.CM0111.10.nd  | 42  | partial | (Q9SI32) Expressed protein (Hypothetical protein At2g04940) - Arabidopsis thaliana (Mouse-ear cress)                                           |
| chr3.CM0112.320.nd | 235 | partial | (Q9ZSP8) Latex-abundant protein - Hevea brasiliensis (Para rubber tree)                                                                        |
| chr3.CM0112.50.nc  | 248 | partial | (Q1SSK7) Peptidase C14, caspase catalytic subunit p20 - Medicago truncatula (Barrel medic)                                                     |
| chr3.CM0116.400.nd | 118 | partial | (Q9FKA7) Similarity to nuclear protein 95 (Zinc finger-like protein) (At5g39550) - Arabidopsis thaliana (Mouse-ear cress)                      |
| chr3.CM0127.70.nc  | 83  | partial | unknown protein                                                                                                                                |
| chr3.CM0135.40.nc  | 72  | partial | unknown protein                                                                                                                                |
| chr3.CM0142.20.nd  | 116 | partial | (Q9SCM9) Hypothetical protein T8H10.30 - Arabidopsis thaliana (Mouse-ear cress)                                                                |
| chr3.CM0160.940.nd | 76  | partial | (Q9ZWC2) F21M11.4 protein - Arabidopsis thaliana (Mouse-ear cress)                                                                             |
| chr3.CM0164.10.nd  | 59  | partial | (Q8H0D9) Alcohol dehydroge - Phaseolus lunatus (Lima bean) (Phaseolus limensis)                                                                |
| chr3.CM0176.240.nd | 32  | partial | (Q1S821) Zinc finger, RING-type - Medicago truncatula (Barrel medic)                                                                           |
| chr3.CM0213.210.nd | 95  | partial | (Q43781) Aspartate aminotransferase (EC 2.6.1.1) - Lotus japonicus                                                                             |
| chr3.CM0216.10.nd  | 96  | partial | (Q8S532) Cytosolic aldehyde dehydrogenase RF2C - Zea mays (Maize)                                                                              |
| chr3.CM0216.130.nd | 45  | partial | (O65750) 26S protease regulatory subunit 6 (Fragment) - Cicer arietinum (Chickpea) (Garbanzo)                                                  |
| chr3.CM0216.920.nd | 62  | partial | (Q9LV48) Protein kinase-like protein (At3g24550) (Hypothetical protein At3g24550) (AT3g24550/MOB24_8) - Arabidopsis thaliana (Mouse-ear cress) |
| chr3.CM0216.960.nd | 81  | partial | (A3AKX7) Hypothetical protein - Oryza sativa (japonica cultivar-group)                                                                         |



|                     |     |         |                                                                                                                                                                 |
|---------------------|-----|---------|-----------------------------------------------------------------------------------------------------------------------------------------------------------------|
| chr3.CM0246.90.nd   | 50  | partial | (Q1RWA1) Multicatalytic endopeptidase complex, proteasome component, beta subunit-related - <i>Medicago truncatula</i> (Barrel medic)                           |
| chr3.CM0261.250.nc  | 38  | partial | (Q6IM91) DVL10 - <i>Arabidopsis thaliana</i> (Mouse-ear cress)                                                                                                  |
| chr3.CM0261.270.nc  | 53  | partial | (Q1T343) DNA topoisomerase II; Serine/threonine-specific protein phosphatase and bis(5-nucleosyl)-tetrakisphosphate - <i>Medicago truncatula</i> (Barrel medic) |
| chr3.CM0261.300.nd  | 46  | partial | (Q43445) S-adenosyl-L-methionine:delta24-sterol-C-methyltransferase - <i>Glycine max</i> (Soybean)                                                              |
| chr3.CM0261.390.nd  | 57  | partial | (Q9M1X8) Hypothetical protein F24G16.250 (Hypothetical protein At3g59980) (Hypothetical protein) - <i>Arabidopsis thaliana</i> (Mouse-ear cress)                |
| chr3.CM0279.400.nc  | 61  | partial | (Q94B52) Hypothetical protein T10C21.40 (Hypothetical protein At4g30690; T10C21.40) - <i>Arabidopsis thaliana</i> (Mouse-ear cress)                             |
| chr3.CM0282.1050.nc | 45  | partial | (Q3E951) Protein At5g25560 - <i>Arabidopsis thaliana</i> (Mouse-ear cress)                                                                                      |
| chr3.CM0282.110.nd  | 88  | partial | (A2WUU8) Hypothetical protein - <i>Oryza sativa</i> (indica cultivar-group)                                                                                     |
| chr3.CM0282.440.nc  | 43  | partial | (Q6F361) Putative malate dehydrogenase (Hypothetical protein) (Os05g0574400 protein) - <i>Oryza sativa</i> (japonica cultivar-group)                            |
| chr3.CM0282.780.nc  | 100 | partial | unknown protein                                                                                                                                                 |
| chr3.CM0396.400.nd  | 49  | partial | (Q9FEE2) Tonneau 2 (Hypothetical protein At5g18580) - <i>Arabidopsis thaliana</i> (Mouse-ear cress)                                                             |
| chr3.CM0396.520.nd  | 99  | partial | (A3B348) Hypothetical protein - <i>Oryza sativa</i> (japonica cultivar-group)                                                                                   |
| chr3.CM0406.120.nd  | 70  | partial | (Q0WV78) Hypothetical protein At1g30240 - <i>Arabidopsis thaliana</i> (Mouse-ear cress)                                                                         |
| chr3.CM0406.160.nd  | 73  | partial | (Q3ZDM4) Natural resistance-associated macrophage protein 5 (Fragment) - <i>Arabis gemmifera</i>                                                                |
| chr3.CM0406.200.nd  | 60  | partial | (Q9C756) Hypothetical protein F12P21.4 - <i>Arabidopsis thaliana</i> (Mouse-ear cress)                                                                          |
| chr3.CM0423.250.nd  | 91  | partial | (Q7XMJ0) OSJNBb0006N15.9 protein (Hypothetical protein) (Os04g0376100 protein) - <i>Oryza sativa</i> (japonica cultivar-group)                                  |
| chr3.CM0460.200.nd  | 141 | partial | (Q2BFM4) Hypothetical protein - <i>Bacillus</i> sp. NRRL B-14911                                                                                                |
| chr3.CM0460.250.nd  | 54  | partial | (Q1RXS8) Multicopper oxidase, type 1 - <i>Medicago truncatula</i> (Barrel medic)                                                                                |
| chr3.CM0574.120.nc  | 31  | partial | (Q9SHS2) Similar to glucose inhibited division protein A from prokaryotes - <i>Arabidopsis thaliana</i> (Mouse-ear cress)                                       |

|                      |     |         |                                                                                                                                                |
|----------------------|-----|---------|------------------------------------------------------------------------------------------------------------------------------------------------|
| chr3.CM0574.230.nd   | 26  | partial | (A3APL3) Hypothetical protein - <i>Oryza sativa</i> (japonica cultivar-group)                                                                  |
| chr3.CM0574.240.nd   | 70  | partial | (Q40156) L.esculentum protein with leucine zipper - <i>Solanum lycopersicum</i> (Tomato) ( <i>Lycopersicon esculentum</i> )                    |
| chr3.CM0590.140.nc   | 68  | partial | (A2RVW1) At4g33480 - <i>Arabidopsis thaliana</i> (Mouse-ear cress)                                                                             |
| chr3.CM0634.130.nc   | 70  | partial | (Q9SCZ4) Receptor-protein kinase-like protein - <i>Arabidopsis thaliana</i> (Mouse-ear cress)                                                  |
| chr3.CM0634.300.nd   | 90  | partial | (Q1STP8) Hypothetical protein - <i>Medicago truncatula</i> (Barrel medic)                                                                      |
| chr3.CM0711.210.nd   | 77  | partial | (A2YW68) Hypothetical protein - <i>Oryza sativa</i> (indica cultivar-group)                                                                    |
| chr3.CM0724.290.nd   | 98  | partial | (Q1SL99) Zinc finger, RING-type; RINGv - <i>Medicago truncatula</i> (Barrel medic)                                                             |
| chr3.CM0726.10.nd    | 50  | partial | (O04083) Lysophospholipase isolog; 25331-24357 (At1g11090) (Putative lysophospholipase isolog) - <i>Arabidopsis thaliana</i> (Mouse-ear cress) |
| chr3.CM0996.160.nd   | 96  | partial | (Q1S0R7) Protein kinase - <i>Medicago truncatula</i> (Barrel medic)                                                                            |
| chr3.CM0996.80.nd    | 56  | partial | (A2Q3K0) AAA ATPase; ABC transporter, transmembrane region, type 1 - <i>Medicago truncatula</i> (Barrel medic)                                 |
| chr3.CM1220.10.nc    | 106 | partial | (Q9SS77) Putative mRNA capping enzyme, RNA guanylyltransferase - <i>Arabidopsis thaliana</i> (Mouse-ear cress)                                 |
| chr3.CM1220.80.nc    | 81  | partial | (Q9FHT3) EmbiCAB69840.1 - <i>Arabidopsis thaliana</i> (Mouse-ear cress)                                                                        |
| chr3.CM1570.60.nd    | 186 | partial | (Q9FX45) RNA-binding glycine-rich protein, putative (At1g73530) - <i>Arabidopsis thaliana</i> (Mouse-ear cress)                                |
| chr3.LjB23H05.50.nd  | 89  | partial | (Q9M9S4) F14L17.16 protein - <i>Arabidopsis thaliana</i> (Mouse-ear cress)                                                                     |
| chr3.LjT02C24.80.nd  | 72  | partial | (A2YN52) Hypothetical protein - <i>Oryza sativa</i> (indica cultivar-group)                                                                    |
| chr3.LjT02L14.100.nd | 42  | partial | (Q1SCS9) Plant lipoxygenase; Lipase/lipoxygenase, PLAT/LH2 - <i>Medicago truncatula</i> (Barrel medic)                                         |
| chr3.LjT04G21.90.nd  | 119 | partial | (Q1SCK8) Protease-associated PA; Peptidase A22B, minor histocompatibility antigen H13 - <i>Medicago truncatula</i> (Barrel medic)              |
| chr3.LjT07H20.280.nd | 73  | partial | (Q1SP70) Tetratricopeptide-like helical - <i>Medicago truncatula</i> (Barrel medic)                                                            |
| chr3.LjT09M07.210.nd | 38  | partial | (A3AMN7) Hypothetical protein - <i>Oryza sativa</i> (japonica cultivar-group)                                                                  |

|                      |     |         |                                                                                                                             |
|----------------------|-----|---------|-----------------------------------------------------------------------------------------------------------------------------|
| chr3.LjT14J20.120.nc | 96  | partial | (Q8LB55) Putative aldolase - Arabidopsis thaliana (Mouse-ear cress)                                                         |
| chr3.LjT18H18.230.nd | 82  | partial | (Q1SB83) E-class P450, group I - Medicago truncatula (Barrel medic)                                                         |
| chr3.LjT18H18.30.nd  | 45  | partial | (A3B5Q0) Hypothetical protein - Oryza sativa (japonica cultivar-group)                                                      |
| chr3.LjT26B16.100.nd | 80  | partial | (A3A7M6) Hypothetical protein - Oryza sativa (japonica cultivar-group)                                                      |
| chr3.LjT26B16.150.nd | 207 | partial | (Q9SB43) Hypothetical protein F24A6.30 (Hypothetical protein AT4g25190) - Arabidopsis thaliana (Mouse-ear cress)            |
| chr3.LjT29G18.160.nd | 55  | partial | (O82343) Expressed protein (Hypothetical protein At2g46260) - Arabidopsis thaliana (Mouse-ear cress)                        |
| chr3.LjT33O20.180.nd | 64  | partial | (Q1S1X4) Hypothetical protein - Medicago truncatula (Barrel medic)                                                          |
| chr3.LjT34H24.210.nd | 176 | partial | (Q4I0Q4) Hypothetical protein - Gibberella zeae (Fusarium graminearum)                                                      |
| chr3.LjT34H24.220.nd | 49  | partial | (Q9M6R5) Meiotic asynaptic mutant 1 - Arabidopsis thaliana (Mouse-ear cress)                                                |
| chr3.LjT36L08.20.nc  | 73  | partial | (Q8W1S2) ABC transporter-like protein - Glycine max (Soybean)                                                               |
| chr3.LjT39G24.140.nd | 115 | partial | (Q9LJM0) GblAAD50048.1 - Arabidopsis thaliana (Mouse-ear cress)                                                             |
| chr3.LjT39G24.180.nd | 55  | partial | unknown protein                                                                                                             |
| chr3.LjT39G24.40.nd  | 87  | partial | (Q5JL21) Hypothetical protein P0459B04.11 - Oryza sativa (japonica cultivar-group)                                          |
| chr3.LjT39G24.60.nd  | 70  | partial | (Q1SS74) C2 - Medicago truncatula (Barrel medic)                                                                            |
| chr3.LjT40O07.100.nc | 63  | partial | (Q9ZWJ0) DNA binding zinc finger protein (Pspzf) (Fragment) - Pisum sativum (Garden pea)                                    |
| chr3.LjT42K05.60.nd  | 47  | partial | (Q1H5B6) At5g42970 - Arabidopsis thaliana (Mouse-ear cress)                                                                 |
| chr3.LjT46L11.130.nc | 44  | partial | (Q9LTX1) Similarity to poly(A)-binding protein - Arabidopsis thaliana (Mouse-ear cress)                                     |
| chr3.LjT46L11.60.nc  | 169 | partial | (Q66GR3) At2g42280 (Putative bHLH transcription factor) - Arabidopsis thaliana (Mouse-ear cress)                            |
| chr3.LjT47O18.160.nc | 48  | partial | (O48931) ClpC - Arabidopsis thaliana (Mouse-ear cress)                                                                      |
| chr3.LjT48P15.10.nc  | 52  | partial | (Q9FP19) Putative nucleolar protein family A member 2 (Os06g0274200 protein) - Oryza sativa (japonica cultivar-group)       |
| chr4.CM0003.450.nd   | 58  | partial | (Q7XTM4) OSJNBa0033G05.21 protein (Hypothetical protein) (OSJNBa0070O11.1 protein) - Oryza sativa (japonica cultivar-group) |

|                     |     |         |                                                                                                                                                                                      |
|---------------------|-----|---------|--------------------------------------------------------------------------------------------------------------------------------------------------------------------------------------|
| chr4.CM0003.600.nd  | 95  | partial | (Q0JED6) Os04g0289800 protein (Hypothetical protein) - <i>Oryza sativa</i> (japonica cultivar-group)                                                                                 |
| chr4.CM0004.100.nd  | 48  | partial | (A0A3A0) Putative ribosomal protein (Fragment) - <i>Artemisia annua</i> (Sweet wormwood)                                                                                             |
| chr4.CM0004.40.nd   | 29  | partial | (Q2WFL0) Caffeoyl-CoA-O-methyltransferase - <i>Codonopsis lanceolata</i>                                                                                                             |
| chr4.CM0006.460.nc  | 99  | partial | (Q8LFF9) Hypothetical protein - <i>Arabidopsis thaliana</i> (Mouse-ear cress)                                                                                                        |
| chr4.CM0006.530.nc  | 60  | partial | unknown protein                                                                                                                                                                      |
| chr4.CM0006.650.nd  | 52  | partial | (A2Q3Z1) Tac7077, putative - <i>Medicago truncatula</i> (Barrel medic)                                                                                                               |
| chr4.CM0006.70.nd   | 64  | partial | (Q1RTL8) IMP dehydrogenase/GMP reductase - <i>Medicago truncatula</i> (Barrel medic)                                                                                                 |
| chr4.CM0007.390.nc  | 34  | partial | (Q2QME5) Eukaryotic translation initiation factor 2 gamma subunit, putative, expressed (Hypothetical protein) (Os12g0607100 protein) - <i>Oryza sativa</i> (japonica cultivar-group) |
| chr4.CM0007.540.nc  | 78  | partial | (Q2PYX9) Glycoprotein endopeptidase-like protein - <i>Solanum tuberosum</i> (Potato)                                                                                                 |
| chr4.CM0007.850.nd  | 121 | partial | (Q1EPA1) Paired amphipathic helix repeat-containing protein / transcription regulator-related - <i>Musa acuminata</i> (Banana)                                                       |
| chr4.CM0042.1200.nc | 44  | partial | (Q9ZTW6) Histidyl-tRNA synthetase (EC 6.1.1.21) (Fragment) - <i>Triticum aestivum</i> (Wheat)                                                                                        |
| chr4.CM0042.1730.nd | 47  | partial | (Q1SRY8) RNA-binding region RNP-1 (RNA recognition motif) - <i>Medicago truncatula</i> (Barrel medic)                                                                                |
| chr4.CM0042.1770.nd | 63  | partial | (P93881) Ribulose 1,5-biphosphate carboxylase large subunit (Fragment) - <i>Hippocrepis emerus</i> (Scorpion senna) ( <i>Coronilla emerus</i> )                                      |
| chr4.CM0042.670.nd  | 125 | partial | (Q9FHD2) Kinesin-like protein - <i>Arabidopsis thaliana</i> (Mouse-ear cress)                                                                                                        |
| chr4.CM0042.720.nd  | 54  | partial | (Q9LS54) GblAAF16598.1 (At3g18360) - <i>Arabidopsis thaliana</i> (Mouse-ear cress)                                                                                                   |
| chr4.CM0046.340.nd  | 47  | partial | (Q8S4X1) UOS1 - <i>Pisum sativum</i> (Garden pea)                                                                                                                                    |
| chr4.CM0075.230.nd  | 36  | partial | (Q8H1P5) Urease accessory protein UreD - <i>Glycine max</i> (Soybean)                                                                                                                |
| chr4.CM0079.20.nd   | 74  | partial | (Q3E8F9) Protein At5g46250 - <i>Arabidopsis thaliana</i> (Mouse-ear cress)                                                                                                           |
| chr4.CM0087.1050.nc | 81  | partial | (Q94KD4) At1g09270/T12M4_2 (Fragment) - <i>Arabidopsis thaliana</i> (Mouse-ear cress)                                                                                                |
| chr4.CM0087.490.nd  | 75  | partial | (Q9SR06) F7O18.15 protein (Hypothetical protein At3g04680) (Hypothetical protein At3g04680; F7O18.15) - <i>Arabidopsis thaliana</i> (Mouse-ear cress)                                |
| chr4.CM0087.90.nd   | 46  | partial | unknown protein                                                                                                                                                                      |

|                    |     |         |                                                                                                           |
|--------------------|-----|---------|-----------------------------------------------------------------------------------------------------------|
| chr4.CM0100.230.nd | 102 | partial | (Q1SCI7) AtHVA22a, 65476-64429 [imported]-Arabidopsis thaliana - Medicago truncatula (Barrel medic)       |
| chr4.CM0100.270.nd | 181 | partial | (Q67UQ0) Hypothetical protein P0453H04.38 (Os06g0651300 protein) - Oryza sativa (japonica cultivar-group) |
| chr4.CM0126.340.nd | 42  | partial | (Q8VWG7) Tetratricoredoxin (Putative HSC70-interacting protein) - Arabidopsis thaliana (Mouse-ear cress)  |
| chr4.CM0126.610.nc | 120 | partial | (O81662) Transcription activator - Pimpinella brachycarpa                                                 |
| chr4.CM0128.530.nd | 95  | partial | (Q7Y1B4) GAI2 (Fragment) - Glycine max (Soybean)                                                          |
| chr4.CM0128.610.nc | 54  | partial | (Q1SBL9) Beta-glucosidase, putative - Medicago truncatula (Barrel medic)                                  |
| chr4.CM0131.310.nd | 49  | partial | (Q9LVU8) GblAAF27101.1 - Arabidopsis thaliana (Mouse-ear cress)                                           |
| chr4.CM0131.450.nd | 79  | partial | (Q9MFG6) NADH dehydrogenase subunit 9 - Lupinus albus (White lupin)                                       |
| chr4.CM0161.430.nd | 92  | partial | (Q6EM00) Beta-galactosidase (Fragment) - Sandersonia aurantiaca (Christmas-bells) (Chinese-lantern lily)  |
| chr4.CM0170.100.nd | 98  | partial | (A2Q544) FAD linked oxidase, N-terminal - Medicago truncatula (Barrel medic)                              |
| chr4.CM0175.20.nd  | 113 | partial | (Q38HS6) Transaldolase-like protein - Solanum tuberosum (Potato)                                          |
| chr4.CM0175.320.nc | 72  | partial | (Q1RX96) Monogalactosyldiacylglycerol synthase - Medicago truncatula (Barrel medic)                       |
| chr4.CM0175.580.nd | 65  | partial | (Q7FAB7) OSJNBa0033H08.4 protein (Hypothetical protein) - Oryza sativa (japonica cultivar-group)          |
| chr4.CM0175.660.nd | 95  | partial | (Q9STY7) Hypothetical protein T21L8.110 - Arabidopsis thaliana (Mouse-ear cress)                          |
| chr4.CM0182.580.nc | 44  | partial | (A3BU92) Hypothetical protein - Oryza sativa (japonica cultivar-group)                                    |
| chr4.CM0227.140.nd | 428 | partial | (Q59UK6) Potential GRIP domain Golgi protein - Candida albicans (Yeast)                                   |
| chr4.CM0227.460.nc | 83  | partial | (Q0WST4) Hypothetical protein At2g40550 - Arabidopsis thaliana (Mouse-ear cress)                          |
| chr4.CM0229.360.nc | 413 | partial | (Q1SUL5) IMP dehydrogenase/GMP reductase - Medicago truncatula (Barrel medic)                             |
| chr4.CM0229.450.nc | 49  | partial | (Q45FY8) Coronatine-insensitive 1 - Glycine max (Soybean)                                                 |
| chr4.CM0229.480.nc | 332 | partial | (Q4DKK2) RNA-binding protein, putative - Trypanosoma cruzi                                                |
| chr4.CM0234.220.nd | 168 | partial | (Q8L7Q0) Hypothetical protein At1g68580 - Arabidopsis thaliana (Mouse-ear cress)                          |

|                    |     |         |                                                                                                                                                     |
|--------------------|-----|---------|-----------------------------------------------------------------------------------------------------------------------------------------------------|
| chr4.CM0234.290.nd | 38  | partial | (Q9FVD7) Ser/Thr specific protein phosphatase 2A A regulatory subunit alpha isoform - Medicago varia (Alfalfa)                                      |
| chr4.CM0244.380.nd | 67  | partial | (Q84P31) Aldehyde dehydrogenase family 7 member A1 (EC 1.2.1.3) - Glycine max (Soybean)                                                             |
| chr4.CM0244.620.nd | 101 | partial | (Q9ZUN9) Hypothetical protein At2g19530 - Arabidopsis thaliana (Mouse-ear cress)                                                                    |
| chr4.CM0244.760.nd | 35  | partial | (Q6EM01) Beta-galactosidase (Fragment) - Sandersonia aurantiaca (Christmas-bells) (Chinese-lantern lily)                                            |
| chr4.CM0247.240.nc | 79  | partial | (Q9LJ87) Arabidopsis thaliana genomic DNA, chromosome 3, BAC clone:F16J14 (Hypothetical protein At3g22590) - Arabidopsis thaliana (Mouse-ear cress) |
| chr4.CM0247.60.nd  | 85  | partial | (Q1SUY5) Zinc finger, CCHC-type - Medicago truncatula (Barrel medic)                                                                                |
| chr4.CM0247.70.nd  | 62  | partial | (Q9XEY7) Trehalase 1 GMTRE1 - Glycine max (Soybean)                                                                                                 |
| chr4.CM0256.30.nd  | 63  | partial | (Q852R1) Serine palmitoyltransferase - Lotus japonicus                                                                                              |
| chr4.CM0281.190.nc | 147 | partial | (Q9FF55) Protein disulphide isomerase-like protein (At5g60640) (Protein disulfide isomerase-like) - Arabidopsis thaliana (Mouse-ear cress)          |
| chr4.CM0288.100.nd | 81  | partial | (O82518) Alternative oxidase - Glycine max (Soybean)                                                                                                |
| chr4.CM0288.210.nd | 84  | partial | unknown protein                                                                                                                                     |
| chr4.CM0288.320.nd | 94  | partial | (O23485) Hypothetical protein dl4230w (Hypothetical protein AT4g16400) - Arabidopsis thaliana (Mouse-ear cress)                                     |
| chr4.CM0297.30.nd  | 114 | partial | (Q0J258) Os09g0376600 protein (Hypothetical protein) - Oryza sativa (japonica cultivar-group)                                                       |
| chr4.CM0297.330.nc | 117 | partial | (Q9SU15) Hypothetical protein T20K18.60 (At4g12710) (Hypothetical protein At4g12710) - Arabidopsis thaliana (Mouse-ear cress)                       |
| chr4.CM0307.100.nc | 136 | partial | (Q5Q0I8) Hypothetical protein - Arabidopsis thaliana (Mouse-ear cress)                                                                              |
| chr4.CM0307.220.nd | 96  | partial | (Q8LAL0) Hypothetical protein (At4g39740) - Arabidopsis thaliana (Mouse-ear cress)                                                                  |
| chr4.CM0387.230.nc | 24  | partial | (Q1SH78) K+ potassium transporter - Medicago truncatula (Barrel medic)                                                                              |
| chr4.CM0399.300.nd | 47  | partial | (Q6J9S1) Putative AP2/EREBP transcription factor - Arabidopsis thaliana (Mouse-ear cress)                                                           |
| chr4.CM0432.80.nd  | 49  | partial | (A3BAL6) Hypothetical protein - Oryza sativa (japonica cultivar-group)                                                                              |
| chr4.CM0500.200.nd | 168 | partial | (Q84TJ9) Putative respiratory burst oxidase protein B - Arabidopsis thaliana (Mouse-ear cress)                                                      |

|                      |     |         |                                                                                                                                             |
|----------------------|-----|---------|---------------------------------------------------------------------------------------------------------------------------------------------|
| chr4.CM0501.180.nd   | 35  | partial | (A2XPL8) Hypothetical protein - <i>Oryza sativa</i> (indica cultivar-group)                                                                 |
| chr4.CM0536.40.nd    | 40  | partial | (Q69PH3) Putative transcription factor EREBP1 (Hypothetical protein) (Os09g0434500 protein) - <i>Oryza sativa</i> (japonica cultivar-group) |
| chr4.CM0536.50.nd    | 49  | partial | (A2YGX9) Hypothetical protein - <i>Oryza sativa</i> (indica cultivar-group)                                                                 |
| chr4.CM0558.50.nd    | 83  | partial | (Q3ECJ3) Protein At1g63640 - <i>Arabidopsis thaliana</i> (Mouse-ear cress)                                                                  |
| chr4.CM0617.150.nd   | 40  | partial | unknown protein                                                                                                                             |
| chr4.CM0617.20.nd    | 83  | partial | (Q9M0Y7) Hypothetical protein AT4g04920 - <i>Arabidopsis thaliana</i> (Mouse-ear cress)                                                     |
| chr4.CM0680.190.nc   | 36  | partial | (Q9M0B2) Hypothetical protein AT4g30480 - <i>Arabidopsis thaliana</i> (Mouse-ear cress)                                                     |
| chr4.CM0692.470.nd   | 78  | partial | (Q1T3I5) Hypothetical protein - <i>Medicago truncatula</i> (Barrel medic)                                                                   |
| chr4.CM1334.230.nc   | 129 | partial | (A3CJW2) Hypothetical protein - <i>Oryza sativa</i> (japonica cultivar-group)                                                               |
| chr4.CM1616.310.nc   | 40  | partial | (Q8GWL1) Hypothetical protein At4g21320/T6K22_50 - <i>Arabidopsis thaliana</i> (Mouse-ear cress)                                            |
| chr4.LjT06I07.10.nd  | 76  | partial | (A2YW68) Hypothetical protein - <i>Oryza sativa</i> (indica cultivar-group)                                                                 |
| chr4.LjT06I07.150.nd | 102 | partial | (Q1SDM6) Hypothetical protein - <i>Medicago truncatula</i> (Barrel medic)                                                                   |
| chr4.LjT06I07.160.nd | 54  | partial | (A3A5U6) Hypothetical protein - <i>Oryza sativa</i> (japonica cultivar-group)                                                               |
| chr4.LjT16L01.150.nd | 51  | partial | (Q9LU88) Acetyltransferase-like protein - <i>Arabidopsis thaliana</i> (Mouse-ear cress)                                                     |
| chr4.LjT38A20.10.nd  | 51  | partial | (Q9LP53) F28N24.7 protein (Hypothetical protein) (At1g29250/F28N24_8) - <i>Arabidopsis thaliana</i> (Mouse-ear cress)                       |
| chr4.LjT38A20.120.nd | 95  | partial | (Q7Y1B4) GAI2 (Fragment) - <i>Glycine max</i> (Soybean)                                                                                     |
| chr4.LjT38A20.130.nd | 38  | partial | (Q1SH78) K <sup>+</sup> potassium transporter - <i>Medicago truncatula</i> (Barrel medic)                                                   |
| chr4.LjT38A20.20.nd  | 38  | partial | (Q1SH78) K <sup>+</sup> potassium transporter - <i>Medicago truncatula</i> (Barrel medic)                                                   |
| chr4.LjT38A20.240.nd | 39  | partial | (A3A380) Hypothetical protein - <i>Oryza sativa</i> (japonica cultivar-group)                                                               |
| chr5.CM0024.550.nc   | 140 | partial | (Q5I285) Minichromosome maintenance protein - <i>Zea mays</i> (Maize)                                                                       |
| chr5.CM0034.170.nd   | 75  | partial | (Q1S4Q5) Hypothetical protein - <i>Medicago truncatula</i> (Barrel medic)                                                                   |
| chr5.CM0048.480.nd   | 54  | partial | (Q9M262) Hypothetical protein F21F14.210 (At3g62040) - <i>Arabidopsis thaliana</i> (Mouse-ear cress)                                        |

|                     |     |         |                                                                                                                                                                      |
|---------------------|-----|---------|----------------------------------------------------------------------------------------------------------------------------------------------------------------------|
| chr5.CM0048.50.nd   | 50  | partial | (Q549W5) ASYMMETRIC LEAVES2-like gene 5 protein (Fragment) - Arabidopsis thaliana (Mouse-ear cress)                                                                  |
| chr5.CM0062.10.nd   | 62  | partial | (Q5SMZ1) Aldose 1-epimerase-like (Hypothetical protein) - Oryza sativa (japonica cultivar-group)                                                                     |
| chr5.CM0071.280.nd  | 37  | partial | (Q9AUZ4) Hypothetical protein OSJNBa0026O12.14 (Hypothetical protein) (Protein kinase domain containing protein, expressed) - Oryza sativa (japonica cultivar-group) |
| chr5.CM0071.630.nc  | 37  | partial | (Q1RSH3) GroEL-like chaperone, ATPase - Medicago truncatula (Barrel medic)                                                                                           |
| chr5.CM0072.270.nd  | 50  | partial | (Q9ZQ24) Expressed protein (Hypothetical protein) (Hypothetical protein At2g24440/T28I24.17) - Arabidopsis thaliana (Mouse-ear cress)                                |
| chr5.CM0077.300.nd  | 44  | partial | (Q8LFY7) Hypothetical protein - Arabidopsis thaliana (Mouse-ear cress)                                                                                               |
| chr5.CM0077.320.nd  | 101 | partial | (Q1SB58) At1g05960/T21E18_20 - Medicago truncatula (Barrel medic)                                                                                                    |
| chr5.CM0077.410.nd  | 60  | partial | (Q69MC9) Putative carbonic anhydrase (Os09g0464000 protein) - Oryza sativa (japonica cultivar-group)                                                                 |
| chr5.CM0077.710.nc  | 38  | partial | (Q403G8) Dihydroflavonol 4-reductase - Lotus japonicus                                                                                                               |
| chr5.CM0089.40.nc   | 47  | partial | (Q1RTK2) Like-Sm ribonucleoprotein-related, core - Medicago truncatula (Barrel medic)                                                                                |
| chr5.CM0089.560.nd  | 76  | partial | (Q9SX85) F16N3.18 protein - Arabidopsis thaliana (Mouse-ear cress)                                                                                                   |
| chr5.CM0089.800.nd  | 54  | partial | (Q1S2K6) Xanthine/uracil/vitamin C permease - Medicago truncatula (Barrel medic)                                                                                     |
| chr5.CM0096.150.nc  | 59  | partial | (Q9SUQ2) Putative Ap2 domain protein (At4g23750) (AT4g23750/F9D16_220) - Arabidopsis thaliana (Mouse-ear cress)                                                      |
| chr5.CM0096.600.nd  | 57  | partial | (Q1SQZ3) Hypothetical protein - Medicago truncatula (Barrel medic)                                                                                                   |
| chr5.CM0148.450.nd  | 74  | partial | (Q6J2K7) Protein tyrosine phosphatase - Phaseolus vulgaris (Kidney bean) (French bean)                                                                               |
| chr5.CM0180.100.nc  | 56  | partial | unknown protein                                                                                                                                                      |
| chr5.CM0200.1140.nc | 91  | partial | (Q65XE1) Hypothetical protein OJ1504_G04.13 - Oryza sativa (japonica cultivar-group)                                                                                 |
| chr5.CM0200.1510.nd | 40  | partial | (A3A3X7) Hypothetical protein - Oryza sativa (japonica cultivar-group)                                                                                               |
| chr5.CM0200.1610.nc | 62  | partial | (Q6J8W9) Cellulose synthase - Populus tremula x Populus tremuloides                                                                                                  |
| chr5.CM0200.1680.nc | 48  | partial | (Q1SEG6) Heavy metal transport/detoxification protein - Medicago truncatula (Barrel medic)                                                                           |



|                     |     |         |                                                                                                       |
|---------------------|-----|---------|-------------------------------------------------------------------------------------------------------|
| chr5.CM0200.440.nc  | 112 | partial | (Q9LJN4) Beta-1,4-xylosidase - Arabidopsis thaliana (Mouse-ear cress)                                 |
| chr5.CM0200.460.nc  | 53  | partial | (Q1A3R7) CASTOR protein (Fragment) - Glycine max (Soybean)                                            |
| chr5.CM0200.750.nd  | 69  | partial | (A2TLT1) BRI1-associated receptor kinase 1 - Hordeum vulgare var. distichum (Two-rowed barley)        |
| chr5.CM0211.10.nc   | 108 | partial | (Q9SJZ8) Putative non-LTR retroelement reverse transcriptase - Arabidopsis thaliana (Mouse-ear cress) |
| chr5.CM0239.300.nc  | 40  | partial | (Q76HA7) Beta subunit of ATP synthase (Fragment) - Chlamydomonas chlorococcoides                      |
| chr5.CM0260.80.nd   | 63  | partial | (Q8LFK0) Beta-N-acetylhexosaminidase-like protein - Arabidopsis thaliana (Mouse-ear cress)            |
| chr5.CM0299.520.nd  | 49  | partial | (Q8H8M5) Putative kinase - Oryza sativa (japonica cultivar-group)                                     |
| chr5.CM0328.780.nd  | 65  | partial | (Q2V3Z2) Protein At3g02510 (Hypothetical protein At3g02510) - Arabidopsis thaliana (Mouse-ear cress)  |
| chr5.CM0344.230.nc  | 100 | partial | (Q1RZZ2) Ribonuclease H - Medicago truncatula (Barrel medic)                                          |
| chr5.CM0344.310.nc  | 181 | partial | (A0MEQ4) Hypothetical protein (Fragment) - Arabidopsis thaliana (Mouse-ear cress)                     |
| chr5.CM0344.470.nd  | 42  | partial | (Q9SCS2) CDPK-related protein kinase - Arabidopsis thaliana (Mouse-ear cress)                         |
| chr5.CM0344.70.nd   | 100 | partial | (Q7XA53) Sucrose transporter - Glycine max (Soybean)                                                  |
| chr5.CM0345.1550.nc | 68  | partial | (Q84V02) Vacuolar membrane ATPase subunit c" - Citrus limon (Lemon)                                   |
| chr5.CM0345.350.nd  | 84  | partial | (A3A3D1) Hypothetical protein - Oryza sativa (japonica cultivar-group)                                |
| chr5.CM0345.480.nc  | 73  | partial | (Q9AST4) AT4g31930/F10N7_260 - Arabidopsis thaliana (Mouse-ear cress)                                 |
| chr5.CM0345.840.nc  | 61  | partial | (Q9LXM2) CCR4-associated factor 1-like protein - Arabidopsis thaliana (Mouse-ear cress)               |
| chr5.CM0345.850.nc  | 45  | partial | (Q4LAW5) Putative ethylene response protein - Capsicum chinense (Scotch bonnet) (Bonnet pepper)       |
| chr5.CM0345.900.nc  | 46  | partial | (Q5XEZ1) At2g25300 - Arabidopsis thaliana (Mouse-ear cress)                                           |
| chr5.CM0345.920.nc  | 22  | partial | (Q94A05) Hypothetical protein At4g32120 - Arabidopsis thaliana (Mouse-ear cress)                      |
| chr5.CM0345.960.nc  | 31  | partial | (Q6VEV1) 40S ribosomal protein S25 (Fragment) - Glycine max (Soybean)                                 |
| chr5.CM0357.130.nd  | 50  | partial | (Q1S0J0) Generic methyltransferase - Medicago truncatula (Barrel medic)                               |
| chr5.CM0456.140.nd  | 120 | partial | (Q1SVM0) Cyclin-like F-box - Medicago truncatula (Barrel medic)                                       |

|                      |     |         |                                                                                                              |
|----------------------|-----|---------|--------------------------------------------------------------------------------------------------------------|
| chr5.CM0456.170.nd   | 109 | partial | (Q9FGZ3) Similarity to unknown protein - Arabidopsis thaliana (Mouse-ear cress)                              |
| chr5.CM0456.360.nd   | 35  | partial | (Q1RYK6) Cyclic peptide transporter - Medicago truncatula (Barrel medic)                                     |
| chr5.CM0456.380.nd   | 47  | partial | (Q9FHX1) TMV resistance protein-like - Arabidopsis thaliana (Mouse-ear cress)                                |
| chr5.CM0494.90.nd    | 75  | partial | (Q8S8Z6) Syringolide-induced protein 13-1-1 - Glycine max (Soybean)                                          |
| chr5.CM0569.120.nd   | 48  | partial | (Q4VYC7) Coiled-coil-helix-coiled-coil-helix domain containing protein - Medicago truncatula (Barrel medic)  |
| chr5.CM0569.310.nc   | 57  | partial | (Q6K701) Putative fibrillarin (Hypothetical protein) - Oryza sativa (japonica cultivar-group)                |
| chr5.CM0571.50.nd    | 83  | partial | (Q1SHX1) Oligopeptide transporter OPT superfamily - Medicago truncatula (Barrel medic)                       |
| chr5.CM0813.250.nc   | 46  | partial | (Q0WRJ1) Predicted GPI-anchored protein - Arabidopsis thaliana (Mouse-ear cress)                             |
| chr5.CM0852.150.nd   | 40  | partial | (A3BW27) Hypothetical protein - Oryza sativa (japonica cultivar-group)                                       |
| chr5.CM0911.210.nd   | 139 | partial | (Q9FK76) Subtilisin-like protease (Putative subtilisin) - Arabidopsis thaliana (Mouse-ear cress)             |
| chr5.CM0911.80.nd    | 38  | partial | unknown protein                                                                                              |
| chr5.CM0953.170.nc   | 47  | partial | (Q9FLH8) Fructokinase 1 - Arabidopsis thaliana (Mouse-ear cress)                                             |
| chr5.CM0956.180.nc   | 55  | partial | (Q1G3Y0) Hypothetical protein - Arabidopsis thaliana (Mouse-ear cress)                                       |
| chr5.CM0956.250.nd   | 79  | partial | (Q3E9C2) Protein At5g19310 - Arabidopsis thaliana (Mouse-ear cress)                                          |
| chr5.CM0956.60.nc    | 37  | partial | unknown protein                                                                                              |
| chr5.CM1125.420.nc   | 78  | partial | (Q9C540) Cytochrome b-561, putative (At1g26100) (Cytochrome b-561D) - Arabidopsis thaliana (Mouse-ear cress) |
| chr5.CM1125.460.nc   | 265 | partial | (Q7XJE4) Metacaspase 4 - Arabidopsis thaliana (Mouse-ear cress)                                              |
| chr5.CM1125.470.nc   | 42  | partial | (A3CEV8) Hypothetical protein - Oryza sativa (japonica cultivar-group)                                       |
| chr5.CM1574.20.nc    | 50  | partial | (Q6DXR6) Putative permease - Gossypium hirsutum (Upland cotton)                                              |
| chr5.LjT02I10.80.nd  | 65  | partial | (Q8RXQ4) Hypothetical protein At1g71840 - Arabidopsis thaliana (Mouse-ear cress)                             |
| chr5.LjT08L18.140.nd | 92  | partial | (Q9C8N3) Hypothetical protein F7P12.4 - Arabidopsis thaliana (Mouse-ear cress)                               |
| chr5.LjT09B23.50.nd  | 38  | partial | (Q1SH78) K <sup>+</sup> potassium transporter - Medicago truncatula (Barrel medic)                           |
| chr5.LjT09C21.200.nd | 60  | partial | (Q304W7) Calcium sensing protein (Hypothetical protein) - Oryza sativa (indica cultivar-group)               |

|                      |     |         |                                                                                                                                                       |
|----------------------|-----|---------|-------------------------------------------------------------------------------------------------------------------------------------------------------|
| chr5.LjT15D05.120.nd | 88  | partial | (Q0WQX8) ABC transporter-like protein - Arabidopsis thaliana (Mouse-ear cress)                                                                        |
| chr5.LjT17D03.160.nd | 43  | partial | (Q1H5B6) At5g42970 - Arabidopsis thaliana (Mouse-ear cress)                                                                                           |
| chr5.LjT18P14.190.nd | 44  | partial | (A2YYA6) Hypothetical protein - Oryza sativa (indica cultivar-group)                                                                                  |
| chr5.LjT25B19.120.nd | 102 | partial | (Q9XED4) Receptor-like protein kinase homolog RK20-1 - Phaseolus vulgaris (Kidney bean) (French bean)                                                 |
| chr5.LjT29J15.70.nc  | 40  | partial | (Q9LVW1) DNA mismatch repair protein MutS2-like - Arabidopsis thaliana (Mouse-ear cress)                                                              |
| chr5.LjT39E05.170.nd | 58  | partial | (Q9C6S5) Amino acid permease, putative (At1g31830) - Arabidopsis thaliana (Mouse-ear cress)                                                           |
| chr5.LjT41L03.40.nd  | 130 | partial | (Q9ZSP8) Latex-abundant protein - Hevea brasiliensis (Para rubber tree)                                                                               |
| chr5.LjT42D02.50.nd  | 59  | partial | (Q9SL69) Expressed protein (Putative membrane protein COV) (Hypothetical protein) - Arabidopsis thaliana (Mouse-ear cress)                            |
| chr5.LjT43D06.90.nd  | 44  | partial | (A3CAN3) Hypothetical protein - Oryza sativa (japonica cultivar-group)                                                                                |
| chr5.LjT48O19.140.nd | 54  | partial | (Q9XIK0) T10O24.14 (Hypothetical protein) - Arabidopsis thaliana (Mouse-ear cress)                                                                    |
| chr6.CM0013.530.nd   | 37  | partial | (Q9C9P4) Putative 3-ketoacyl-ACP synthase; 47419-50803 (At1g74960/F9E10_19) (Beta-ketoacyl-ACP synthetase 2) - Arabidopsis thaliana (Mouse-ear cress) |
| chr6.CM0037.1140.nc  | 59  | partial | (Q9FJA0) GblAAD21756.1 - Arabidopsis thaliana (Mouse-ear cress)                                                                                       |
| chr6.CM0041.400.nd   | 187 | partial | (Q9FKJ9) GblAAF24606.1 - Arabidopsis thaliana (Mouse-ear cress)                                                                                       |
| chr6.CM0055.550.nd   | 69  | partial | (Q1SZU4) Protein kinase PKN/PRK1, effector - Medicago truncatula (Barrel medic)                                                                       |
| chr6.CM0055.570.nd   | 49  | partial | (Q94AF2) AT5g19150/T24G5_50 - Arabidopsis thaliana (Mouse-ear cress)                                                                                  |
| chr6.CM0055.630.nd   | 36  | partial | (Q9FMF7) 2-oxoglutarate/malate translocator (At5g64290) - Arabidopsis thaliana (Mouse-ear cress)                                                      |
| chr6.CM0066.300.nc   | 44  | partial | (A3A3D1) Hypothetical protein - Oryza sativa (japonica cultivar-group)                                                                                |
| chr6.CM0114.190.nc   | 67  | partial | (Q2RAU6) Mpp10 protein, expressed (Hypothetical protein) (Os11g0137100 protein) - Oryza sativa (japonica cultivar-group)                              |
| chr6.CM0118.130.nd   | 45  | partial | (Q1SGY6) Transcriptional factor B3; Auxin response factor; Aux/IAA_ARF_dimerisation - Medicago truncatula (Barrel medic)                              |

|                     |     |         |                                                                                                                                        |
|---------------------|-----|---------|----------------------------------------------------------------------------------------------------------------------------------------|
| chr6.CM0118.200.nd  | 52  | partial | (Q9FP19) Putative nucleolar protein family A member 2 (Os06g0274200 protein) - <i>Oryza sativa</i> (japonica cultivar-group)           |
| chr6.CM0139.220.nd  | 445 | partial | (Q2PET4) Hypothetical protein - <i>Trifolium pratense</i> (Red clover)                                                                 |
| chr6.CM0139.650.nd  | 124 | partial | (A3KDM4) Multi antimicrobial extrusion family protein - <i>Nicotiana tabacum</i> (Common tobacco)                                      |
| chr6.CM0139.720.nd  | 77  | partial | (Q3HVK4) Ribosomal protein S6-like protein - <i>Solanum tuberosum</i> (Potato)                                                         |
| chr6.CM0314.740.nd  | 110 | partial | unknown protein                                                                                                                        |
| chr6.CM0314.810.nd  | 82  | partial | (Q1S7E5) MtN3 and saliva related transmembrane protein - <i>Medicago truncatula</i> (Barrel medic)                                     |
| chr6.CM0420.190.nd  | 187 | partial | (Q6KAC4) Putative X1 (Hypothetical protein) (Os02g0293300 protein) - <i>Oryza sativa</i> (japonica cultivar-group)                     |
| chr6.CM0472.60.nc   | 59  | partial | (A3BKC2) Hypothetical protein - <i>Oryza sativa</i> (japonica cultivar-group)                                                          |
| chr6.CM0539.260.nd  | 44  | partial | (A3AWH4) Hypothetical protein - <i>Oryza sativa</i> (japonica cultivar-group)                                                          |
| chr6.CM0539.470.nd  | 63  | partial | (Q3E9D5) Protein At5g18930 (S-adenosylmethionine decarboxylase) - <i>Arabidopsis thaliana</i> (Mouse-ear cress)                        |
| chr6.CM0539.480.nd  | 130 | partial | (Q1T2V3) Concanavalin A-like lectin/glucanase - <i>Medicago truncatula</i> (Barrel medic)                                              |
| chr6.CM0686.30.nd   | 45  | partial | (Q84WH9) Hypothetical protein At1g04780 (Fragment) - <i>Arabidopsis thaliana</i> (Mouse-ear cress)                                     |
| chr6.CM0836.110.nd  | 158 | partial | (Q6DT75) AT1G06530 (Fragment) - <i>Arabidopsis lyrata</i> subsp. <i>petraea</i> (Northern rock-cress) ( <i>Cardaminopsis petraea</i> ) |
| chr6.CM0836.150.nd  | 50  | partial | (Q1RXX6) Ycf1 - <i>Medicago truncatula</i> (Barrel medic)                                                                              |
| chr6.CM0836.70.nd   | 135 | partial | (Q6CGV5) Similarity - <i>Yarrowia lipolytica</i> ( <i>Candida lipolytica</i> )                                                         |
| chr6.CM0885.300.nc  | 59  | partial | (Q9LM93) F2D10.6 (Hypothetical protein At1g20570) (At1g20575) - <i>Arabidopsis thaliana</i> (Mouse-ear cress)                          |
| chr6.CM1789.180.nd  | 59  | partial | (Q1SDQ9) E-class P450, group I - <i>Medicago truncatula</i> (Barrel medic)                                                             |
| chr6.CM1789.80.nd   | 43  | partial | (A3BSQ7) Hypothetical protein - <i>Oryza sativa</i> (japonica cultivar-group)                                                          |
| chr6.CM1829.70.nc   | 49  | partial | (Q1S821) Zinc finger, RING-type - <i>Medicago truncatula</i> (Barrel medic)                                                            |
| chr6.LjB02K20.70.nd | 92  | partial | (Q94B70) Hypothetical protein F27K19_220 (Hypothetical protein At3g56040; F27K19_220) - <i>Arabidopsis thaliana</i> (Mouse-ear cress)  |

|                      |     |         |                                                                                                                                                                     |
|----------------------|-----|---------|---------------------------------------------------------------------------------------------------------------------------------------------------------------------|
| chr6.LjT02P05.160.nd | 95  | partial | (Q7Y1B4) GAI2 (Fragment) - Glycine max (Soybean)                                                                                                                    |
| chr6.LjT04E21.100.nc | 114 | partial | (A2X7Q0) Hypothetical protein - Oryza sativa (indica cultivar-group)                                                                                                |
| chr6.LjT04E21.130.nc | 41  | partial | (Q6S4R9) Allantoinase (EC 3.5.2.5) - Robinia pseudoacacia (Black locust)                                                                                            |
| chr6.LjT09E22.30.nd  | 346 | partial | (Q1LWB7) Novel protein similar to vertebrate early endosome antigen 1, 162kD (EEA1) (Fragment) - Brachydanio rerio (Zebrafish) (Danio rerio)                        |
| chr6.LjT14A08.100.nd | 44  | partial | (Q1SJG9) Aminotransferase, class V - Medicago truncatula (Barrel medic)                                                                                             |
| chr6.LjT14A08.30.nd  | 71  | partial | (Q1SKK0) Cellular retinaldehyde-binding/triple function, N-terminal - Medicago truncatula (Barrel medic)                                                            |
| chr6.LjT17I05.220.nd | 49  | partial | (Q6EP65) Hypothetical protein B1077E10.21 (Hypothetical protein) (Os09g0261400 protein) (Hypothetical protein P0638A12.10) - Oryza sativa (japonica cultivar-group) |
| chr6.LjT17I05.240.nd | 70  | partial | (Q93ZL4) At3g07700/F17A17.4 - Arabidopsis thaliana (Mouse-ear cress)                                                                                                |
| chr6.LjT17I05.60.nd  | 57  | partial | (Q944G3) Acetyl Co-A acetyltransferase - Hevea brasiliensis (Para rubber tree)                                                                                      |
| chr6.LjT28D11.20.nc  | 35  | partial | (Q1T0B7) Argininosuccinate synthase - Medicago truncatula (Barrel medic)                                                                                            |
| chr6.LjT30N23.20.nd  | 79  | partial | (Q9FQ21) Putative Hs1pro-1-like receptor - Glycine max (Soybean)                                                                                                    |
| chr6.LjT34E09.170.nc | 136 | partial | (Q9FVN2) Dual-specific kinase DSK1 - Nicotiana tabacum (Common tobacco)                                                                                             |
| chr6.LjT34N14.50.nd  | 115 | partial | (Q1SLU2) Leucine-rich repeat, plant specific - Medicago truncatula (Barrel medic)                                                                                   |
| chr6.LjT34O10.10.nd  | 49  | partial | (Q1SM53) Hypothetical protein - Medicago truncatula (Barrel medic)                                                                                                  |
| chr6.LjT35H04.240.nd | 72  | partial | (O24422) Desiccation protective protein LEA5 - Glycine max (Soybean)                                                                                                |
| chr6.LjT35H04.50.nd  | 45  | partial | (Q8S4X0) Embryo-abundant protein EMB - Pisum sativum (Garden pea)                                                                                                   |
| chr6.LjT40F03.130.nd | 96  | partial | (O82023) N7 protein (Fragment) - Medicago truncatula (Barrel medic)                                                                                                 |
| chr6.LjT45M04.10.nd  | 44  | partial | (A3AM15) Hypothetical protein - Oryza sativa (japonica cultivar-group)                                                                                              |
| chr6.LjT45M04.30.nd  | 92  | partial | (Q6UD75) LysM domain-containing receptor-like kinase 6 - Medicago truncatula (Barrel medic)                                                                         |
| chr6.LjT45M04.90.nd  | 46  | partial | (A2Q1L9) Protein kinase - Medicago truncatula (Barrel medic)                                                                                                        |
| CM0325.20.nd         | 51  | partial | (Q8LAE7) Hypothetical protein - Arabidopsis thaliana (Mouse-ear cress)                                                                                              |
| CM0385.220.nd        | 237 | partial | (Q9FR07) P-like protein - Zea mays subsp. parviglumis (Balsas teosinte)                                                                                             |
| CM0457.110.nd        | 119 | partial | (Q672H5) 5-alpha-reductase - Pisum sativum (Garden pea)                                                                                                             |

|                 |     |         |                                                                                                                                               |
|-----------------|-----|---------|-----------------------------------------------------------------------------------------------------------------------------------------------|
| CM0528.10.nd    | 37  | partial | (A3AMN7) Hypothetical protein - <i>Oryza sativa</i> (japonica cultivar-group)                                                                 |
| CM0528.120.nd   | 66  | partial | (Q94C32) AT4g37280/C7A10_80 - <i>Arabidopsis thaliana</i> (Mouse-ear cress)                                                                   |
| CM0528.80.nd    | 83  | partial | (Q51190) Beta-galactosidase - <i>Prunus persica</i> (Peach)                                                                                   |
| CM0547.190.nd   | 47  | partial | (Q6Q3H4) Fructokinase - <i>Citrus unshiu</i> (Satsuma orange)                                                                                 |
| CM0547.80.nc    | 53  | partial | (Q2MGR2) SGS; HSP20-like chaperone - <i>Medicago truncatula</i> (Barrel medic)                                                                |
| CM0601.210.nd   | 246 | partial | (Q9LU79) GblAAF21150.1 - <i>Arabidopsis thaliana</i> (Mouse-ear cress)                                                                        |
| CM0905.150.nd   | 78  | partial | (A2Q222) Tetratricopeptide-like helical - <i>Medicago truncatula</i> (Barrel medic)                                                           |
| CM1102.10.nd    | 59  | partial | (A3AB26) Hypothetical protein - <i>Oryza sativa</i> (japonica cultivar-group)                                                                 |
| CM1102.250.nd   | 90  | partial | (Q1PG93) Antiporter (Fragment) - <i>Striga asiatica</i>                                                                                       |
| CM1102.50.nd    | 38  | partial | (Q8RW11) Putative glycine rich protein - <i>Rumex obtusifolius</i> (Bitter dock)                                                              |
| CM1324.170.nd   | 64  | partial | (Q1SGW8) T29M8.1/T29M8.1-related - <i>Medicago truncatula</i> (Barrel medic)                                                                  |
| CM1489.80.nc    | 48  | partial | (Q59IV6) Plastidic phosphate translocator-like protein1 - <i>Mesembryanthemum crystallinum</i> (Common ice plant)                             |
| CM1729.150.nc   | 117 | partial | (Q2HUC6) ELM2; AT-rich interaction region; Homeodomain-related - <i>Medicago truncatula</i> (Barrel medic)                                    |
| LjB10M19.50.nd  | 215 | partial | (Q6L4C0) Putative zinc finger protein, identical - <i>Solanum demissum</i> (Wild potato)                                                      |
| LjB12O06.20.nc  | 65  | partial | (Q1SKK0) Cellular retinaldehyde-binding/triple function, N-terminal - <i>Medicago truncatula</i> (Barrel medic)                               |
| LjB16I02.10.nc  | 38  | partial | (Q8H0U0) T-complex polypeptide 1 homologue - <i>Arabidopsis thaliana</i> (Mouse-ear cress)                                                    |
| LjB16I02.30.nc  | 144 | partial | (Q9S851) Hypothetical protein F14G6.2 (Cup-shaped cotyledon 3) (Hypothetical protein F15M4.8) - <i>Arabidopsis thaliana</i> (Mouse-ear cress) |
| LjB18I11.90.nd  | 115 | partial | (Q7XZD0) Isoflavonoid glucosyltransferase - <i>Glycyrrhiza echinata</i> (Licorice)                                                            |
| LjB18O14.140.nd | 112 | partial | (Q6L3K4) Myosin heavy chain-like protein, putative - <i>Solanum demissum</i> (Wild potato)                                                    |
| LjB25I10.30.nd  | 59  | partial | (Q1SDQ9) E-class P450, group I - <i>Medicago truncatula</i> (Barrel medic)                                                                    |
| LjT01E03.40.nd  | 91  | partial | (Q1SST9) ABC transporter, transmembrane region - <i>Medicago truncatula</i> (Barrel medic)                                                    |
| LjT01E03.70.nd  | 72  | partial | (Q1SEN8) Cyclic peptide transporter - <i>Medicago truncatula</i> (Barrel medic)                                                               |

|                 |     |         |                                                                                                                                                                        |
|-----------------|-----|---------|------------------------------------------------------------------------------------------------------------------------------------------------------------------------|
| LjT01G11.180.nd | 29  | partial | (Q6A196) Ferritin - <i>Conyza canadensis</i> (Canadian horseweed)                                                                                                      |
| LjT01G11.50.nd  | 51  | partial | (Q097J8) Alkyl hydroperoxide reductase/ Thiol specific antioxidant/ Mal allergen - <i>Stigmatella aurantiaca</i> DW4/3-1                                               |
| LjT01K14.90.nd  | 42  | partial | (Q9SI32) Expressed protein (Hypothetical protein At2g04940) - <i>Arabidopsis thaliana</i> (Mouse-ear cress)                                                            |
| LjT01P07.180.nd | 34  | partial | (Q8LK61) Nonphosphorylating glyceraldehyde-3-phosphate dehydrogenase (EC 1.2.1.9) - <i>Triticum aestivum</i> (Wheat)                                                   |
| LjT01P07.50.nd  | 96  | partial | (Q4ZH67) High mobility group protein - <i>Cucumis sativus</i> (Cucumber)                                                                                               |
| LjT01P07.60.nd  | 119 | partial | (Q41026) HMG 1 protein - <i>Pisum sativum</i> (Garden pea)                                                                                                             |
| LjT02K08.100.nd | 37  | partial | (Q40206) RAB1X - <i>Lotus japonicus</i>                                                                                                                                |
| LjT02K08.190.nd | 48  | partial | (Q1T104) Zinc finger, RING-type; Zinc finger, CHY-type - <i>Medicago truncatula</i> (Barrel medic)                                                                     |
| LjT02N03.90.nd  | 47  | partial | (Q8MGD2) Ribulose biphosphate carboxylase large subunit (Fragment) - <i>Colysis wrightii</i>                                                                           |
| LjT03D12.100.nd | 107 | partial | (Q6ZEE2) Putative ribose-5-phosphate isomerase (Hypothetical protein) (Os07g0176900 protein) - <i>Oryza sativa</i> (japonica cultivar-group)                           |
| LjT03D14.170.nd | 53  | partial | (Q6R2J8) Strubbelig receptor family 8 - <i>Arabidopsis thaliana</i> (Mouse-ear cress)                                                                                  |
| LjT03E06.30.nd  | 49  | partial | (A3BAL6) Hypothetical protein - <i>Oryza sativa</i> (japonica cultivar-group)                                                                                          |
| LjT03K24.160.nd | 241 | partial | (Q8GT65) Serpin-like protein (Fragment) - <i>Citrus paradisi</i> (Grapefruit)                                                                                          |
| LjT03L03.130.nd | 48  | partial | (Q9FKI9) EmbiCAB86085.1 - <i>Arabidopsis thaliana</i> (Mouse-ear cress)                                                                                                |
| LjT04C06.160.nd | 60  | partial | (Q1A3R7) CASTOR protein (Fragment) - <i>Glycine max</i> (Soybean)                                                                                                      |
| LjT04C06.220.nd | 101 | partial | (Q9SZE4) Hypothetical protein F19B15.190 (Hypothetical protein At4g29160; F19B15.190) (Hypothetical protein AT4g29160) - <i>Arabidopsis thaliana</i> (Mouse-ear cress) |
| LjT04D09.210.nd | 66  | partial | (Q05JG2) ABA 8'-hydroxylase1 (Hypothetical protein) - <i>Oryza sativa</i> (japonica cultivar-group)                                                                    |
| LjT04D09.50.nd  | 60  | partial | (Q1A3R7) CASTOR protein (Fragment) - <i>Glycine max</i> (Soybean)                                                                                                      |
| LjT04I16.50.nd  | 96  | partial | (Q8S532) Cytosolic aldehyde dehydrogenase RF2C - <i>Zea mays</i> (Maize)                                                                                               |
| LjT05D15.230.nd | 56  | partial | (Q672Q7) Hypothetical protein precursor - <i>Solanum lycopersicum</i> (Tomato) ( <i>Lycopersicon esculentum</i> )                                                      |

|                 |     |         |                                                                                                                                                             |
|-----------------|-----|---------|-------------------------------------------------------------------------------------------------------------------------------------------------------------|
| LjT05D15.80.nd  | 62  | partial | (Q7XV33) OSJNBa0086B14.26 protein (Hypothetical protein) - <i>Oryza sativa</i> (japonica cultivar-group)                                                    |
| LjT06C12.180.nd | 50  | partial | (Q8H856) Hypothetical protein OJ1626B05.1 (Hypothetical protein) (Os03g0226600 protein) (Expressed protein) - <i>Oryza sativa</i> (japonica cultivar-group) |
| LjT06M01.50.nd  | 83  | partial | (Q9M0Y7) Hypothetical protein AT4g04920 - <i>Arabidopsis thaliana</i> (Mouse-ear cress)                                                                     |
| LjT06N06.290.nd | 131 | partial | (Q1SSS7) Plastocyanin-like - <i>Medicago truncatula</i> (Barrel medic)                                                                                      |
| LjT06P13.140.nd | 81  | partial | (A2Y7K0) Hypothetical protein - <i>Oryza sativa</i> (indica cultivar-group)                                                                                 |
| LjT06P13.180.nd | 104 | partial | (Q9FM79) Similarity to pectin methylesterase (Quartet1) - <i>Arabidopsis thaliana</i> (Mouse-ear cress)                                                     |
| LjT07B02.10.nd  | 82  | partial | unknown protein                                                                                                                                             |
| LjT07B02.130.nd | 41  | partial | (Q5JNF3) Hypothetical protein P0435H01.26 (Os01g0730500 protein) - <i>Oryza sativa</i> (japonica cultivar-group)                                            |
| LjT07C14.10.nd  | 69  | partial | (Q9LZ77) Hypothetical protein T32M21_80 - <i>Arabidopsis thaliana</i> (Mouse-ear cress)                                                                     |
| LjT07C14.130.nd | 35  | partial | (Q1SUS8) Copper-resistance protein CopA - <i>Medicago truncatula</i> (Barrel medic)                                                                         |
| LjT07J01.140.nd | 41  | partial | (Q1SF66) C2 - <i>Medicago truncatula</i> (Barrel medic)                                                                                                     |
| LjT07P16.210.nd | 56  | partial | (A1K601) Probable GTP-binding protein - <i>Azoarcus</i> sp. (strain BH72)                                                                                   |
| LjT07P16.80.nd  | 38  | partial | (Q9FLQ8) Similarity to unknown protein - <i>Arabidopsis thaliana</i> (Mouse-ear cress)                                                                      |
| LjT08D05.180.nd | 26  | partial | unknown protein                                                                                                                                             |
| LjT09A12.40.nd  | 55  | partial | (Q8LJJ8) Pentatricopeptide (PPR) repeat-containing protein-like (Hypothetical protein) - <i>Oryza sativa</i> (japonica cultivar-group)                      |
| LjT09C09.110.nd | 53  | partial | (Q9FHR5) Similarity to COP1-interacting protein 7 - <i>Arabidopsis thaliana</i> (Mouse-ear cress)                                                           |
| LjT09C09.70.nd  | 60  | partial | (Q3EA29) Protein At4g14746 - <i>Arabidopsis thaliana</i> (Mouse-ear cress)                                                                                  |
| LjT09F05.90.nd  | 32  | partial | (Q7XAS4) Transaldolase - <i>Gossypium hirsutum</i> (Upland cotton) ( <i>Gossypium mexicanum</i> )                                                           |
| LjT09F21.10.nc  | 102 | partial | (Q0JQC4) Os01g0170400 protein - <i>Oryza sativa</i> (japonica cultivar-group)                                                                               |
| LjT09F21.40.nc  | 346 | partial | (Q8NZA4) Streptococcal protective antigen - <i>Streptococcus pyogenes</i> serotype M18                                                                      |
| LjT09I09.150.nd | 66  | partial | (Q8L9T6) Putativepod-specific dehydrogenase SAC25 - <i>Arabidopsis thaliana</i> (Mouse-ear cress)                                                           |



|                 |     |         |                                                                                                   |
|-----------------|-----|---------|---------------------------------------------------------------------------------------------------|
| LjT09K03.150.nd | 44  | partial | (Q84P31) Aldehyde dehydrogenase family 7 member A1 (EC 1.2.1.3) - Glycine max (Soybean)           |
| LjT10B22.90.nd  | 51  | partial | (Q8LD39) Ribosomal protein-like (At5g09770) - Arabidopsis thaliana (Mouse-ear cress)              |
| LjT10D02.110.nd | 70  | partial | (Q4JF74) Topoisomerase II - Scutellaria baicalensis (Baical skullcap)                             |
| LjT10E17.160.nd | 104 | partial | (Q682R0) Hypothetical protein At2g06040 - Arabidopsis thaliana (Mouse-ear cress)                  |
| LjT10F13.70.nd  | 74  | partial | (Q1T2A0) Hypothetical protein - Medicago truncatula (Barrel medic)                                |
| LjT10F13.80.nd  | 124 | partial | (O80986) Hypothetical protein At2g26110 (At2g26110) - Arabidopsis thaliana (Mouse-ear cress)      |
| LjT10I07.150.nd | 104 | partial | (Q30D01) Putative 3-dehydroquinase synthase - Fagus sylvatica (Beechnut)                          |
| LjT10J09.20.nd  | 89  | partial | (A3BCR2) Hypothetical protein - Oryza sativa (japonica cultivar-group)                            |
| LjT10O10.120.nd | 46  | partial | (Q6UA11) Fiber NTGP1-related protein - Gossypium barbadense (Sea-island cotton) (Egyptian cotton) |
| LjT11A15.30.nc  | 146 | partial | (Q40899) Zinc-finger protein - Petunia hybrida (Petunia)                                          |
| LjT11K12.120.nc | 46  | partial | (Q0DKR7) Os05g0147500 protein - Oryza sativa (japonica cultivar-group)                            |
| LjT12E12.90.nd  | 45  | partial | (A0NMN4) Ribose-5-phosphate isomerase A (EC 5.3.1.6) - Stappia aggregata IAM 12614                |
| LjT13F18.100.nd | 32  | partial | (Q1RYZ9) Glycoside hydrolase, family 1 - Medicago truncatula (Barrel medic)                       |
| LjT13N04.130.nd | 72  | partial | (Q9C6Y5) Nucellin, putative - Arabidopsis thaliana (Mouse-ear cress)                              |
| LjT13N04.160.nd | 87  | partial | (Q1RWD2) Peptidase aspartic, active site - Medicago truncatula (Barrel medic)                     |
| LjT13N04.30.nd  | 100 | partial | (Q19TV8) UDP-glucose pyrophosphorylase (EC 2.7.7.9) - Cucumis melo (Muskmelon)                    |
| LjT13N04.90.nd  | 104 | partial | (Q9LT14) Genomic DNA, chromosome 3, P1 clone: MPN9 - Arabidopsis thaliana (Mouse-ear cress)       |
| LjT14D09.30.nc  | 28  | partial | (Q9FJL3) Peptidylprolyl isomerase - Arabidopsis thaliana (Mouse-ear cress)                        |
| LjT14H02.200.nd | 51  | partial | (A2ZXL0) Hypothetical protein - Oryza sativa (japonica cultivar-group)                            |
| LjT14H02.220.nd | 49  | partial | (Q9LZ63) 8-amino-7-oxononanoate synthase-like protein - Arabidopsis thaliana (Mouse-ear cress)    |
| LjT15A10.120.nd | 74  | partial | (Q8LPF0) At1g73960/F2P9_17 - Arabidopsis thaliana (Mouse-ear cress)                               |
| LjT15B14.50.nd  | 38  | partial | (Q1SH78) K <sup>+</sup> potassium transporter - Medicago truncatula (Barrel medic)                |
| LjT15N18.230.nd | 46  | partial | (Q84WP5) Hypothetical protein At2g36330 - Arabidopsis thaliana (Mouse-ear cress)                  |

|                 |     |         |                                                                                                                                 |
|-----------------|-----|---------|---------------------------------------------------------------------------------------------------------------------------------|
| LjT15N18.290.nd | 34  | partial | (A2ZND1) Hypothetical protein - <i>Oryza sativa</i> (japonica cultivar-group)                                                   |
| LjT16E14.120.nc | 30  | partial | (Q93VQ6) At1g07080/F10K1_15 - <i>Arabidopsis thaliana</i> (Mouse-ear cress)                                                     |
| LjT17L12.210.nd | 33  | partial | (Q1T3E8) Helix-turn-helix, AraC type; NAD-binding site; Fumarate lyase - <i>Medicago truncatula</i> (Barrel medic)              |
| LjT17L12.70.nd  | 81  | partial | (Q1SEH9) Carotenoid oxygenase - <i>Medicago truncatula</i> (Barrel medic)                                                       |
| LjT18K22.10.nc  | 80  | partial | (Q8GW29) Putative lysine decarboxylase (At5g06300) - <i>Arabidopsis thaliana</i> (Mouse-ear cress)                              |
| LjT18L24.160.nd | 57  | partial | (Q1RU64) Thioredoxin fold - <i>Medicago truncatula</i> (Barrel medic)                                                           |
| LjT18N19.100.nd | 164 | partial | (Q1SUG8) Hypothetical protein - <i>Medicago truncatula</i> (Barrel medic)                                                       |
| LjT19A14.40.nd  | 97  | partial | (Q9AXU2) Chloroplast translational elongation factor Tu - <i>Pelargonium graveolens</i> (rose geranium)                         |
| LjT19A14.80.nd  | 45  | partial | (Q43611) Hypothetical protein (Fragment) - <i>Phoenix dactylifera</i> (Date palm)                                               |
| LjT19F24.10.nd  | 33  | partial | (Q9SJI9) Expressed protein (At2g42670) - <i>Arabidopsis thaliana</i> (Mouse-ear cress)                                          |
| LjT19N22.20.nd  | 79  | partial | (Q94KU0) ATP8 - <i>Arabidopsis thaliana</i> (Mouse-ear cress)                                                                   |
| LjT20A21.40.nc  | 45  | partial | (Q9FGZ7) <i>Arabidopsis thaliana</i> genomic DNA, chromosome 5, TAC clone:K5J14 - <i>Arabidopsis thaliana</i> (Mouse-ear cress) |
| LjT21I06.190.nd | 44  | partial | (A3A694) Hypothetical protein - <i>Oryza sativa</i> (japonica cultivar-group)                                                   |
| LjT23J20.50.nc  | 34  | partial | (Q1T5S4) Cellular retinaldehyde-binding/triple function, N-terminal - <i>Medicago truncatula</i> (Barrel medic)                 |
| LjT24E04.20.nc  | 175 | partial | (Q8L607) Hypothetical protein At2g41670 (Short integuments 2) - <i>Arabidopsis thaliana</i> (Mouse-ear cress)                   |
| LjT24M05.180.nc | 55  | partial | (Q40221) Protein containing C-terminal RING-finger (RING-finger protein) - <i>Lotus japonicus</i>                               |
| LjT28H08.20.nd  | 124 | partial | (A0MFJ0) Hypothetical protein (Fragment) - <i>Arabidopsis thaliana</i> (Mouse-ear cress)                                        |
| LjT28K11.110.nd | 71  | partial | (A3BBL1) Hypothetical protein - <i>Oryza sativa</i> (japonica cultivar-group)                                                   |
| LjT28K11.190.nd | 49  | partial | (A3AM99) Hypothetical protein - <i>Oryza sativa</i> (japonica cultivar-group)                                                   |
| LjT28K11.220.nd | 72  | partial | (Q0D810) Os07g0192300 protein (Fragment) - <i>Oryza sativa</i> (japonica cultivar-group)                                        |
| LjT28K11.230.nd | 29  | partial | (A3AM99) Hypothetical protein - <i>Oryza sativa</i> (japonica cultivar-group)                                                   |

|                 |     |         |                                                                                                                      |
|-----------------|-----|---------|----------------------------------------------------------------------------------------------------------------------|
| LjT28K11.250.nd | 34  | partial | unknown protein                                                                                                      |
| LjT28K11.40.nd  | 37  | partial | (Q1SGN8) GMC oxidoreductase - Medicago truncatula (Barrel medic)                                                     |
| LjT29B06.110.nd | 46  | partial | (Q2V3T4) Protein At3g23600 - Arabidopsis thaliana (Mouse-ear cress)                                                  |
| LjT29P04.200.nd | 38  | partial | (Q39880) Mitotic cyclin b1-type - Glycine max (Soybean)                                                              |
| LjT29P04.310.nd | 78  | partial | (Q39880) Mitotic cyclin b1-type - Glycine max (Soybean)                                                              |
| LjT30M06.40.nd  | 54  | partial | (A3CHF8) Hypothetical protein - Oryza sativa (japonica cultivar-group)                                               |
| LjT30N04.260.nd | 85  | partial | (Q53NE3) Histone H3-maize - Oryza sativa (japonica cultivar-group)                                                   |
| LjT30N04.60.nd  | 70  | partial | (Q1RVC0) Sterol desaturase - Medicago truncatula (Barrel medic)                                                      |
| LjT30N18.40.nd  | 100 | partial | (O80798) T8F5.4 protein (At1g65270) (Expressed protein) - Arabidopsis thaliana (Mouse-ear cress)                     |
| LjT30N24.230.nd | 62  | partial | (Q8H6S9) Transcription factor TSRF1 - Solanum lycopersicum (Tomato) (Lycopersicon esculentum)                        |
| LjT30N24.60.nd  | 53  | partial | (A3B132) Hypothetical protein - Oryza sativa (japonica cultivar-group)                                               |
| LjT31F12.10.nd  | 40  | partial | (Q1SUA2) Proteasome component region PCI - Medicago truncatula (Barrel medic)                                        |
| LjT31F12.180.nd | 95  | partial | (Q1S230) Protease-associated PA; Proteinase inhibitor I9, subtilisin propeptide - Medicago truncatula (Barrel medic) |
| LjT31J09.90.nd  | 142 | partial | (A0PGA1) Mitogen-activated protein kinase kinase kinase - Vitis vinifera (Grape)                                     |
| LjT31M07.20.nd  | 152 | partial | (A3A498) Hypothetical protein - Oryza sativa (japonica cultivar-group)                                               |
| LjT32E09.70.nd  | 57  | partial | (Q4L0H4) Membrane acyl-CoA binding protein - Agave americana (Century plant)                                         |
| LjT32E09.90.nd  | 53  | partial | (Q1T4J5) AT5g18400/F20L16_120 - Medicago truncatula (Barrel medic)                                                   |
| LjT33K05.100.nd | 74  | partial | (Q9LY31) Palmitoyl-protein thioesterase-like - Arabidopsis thaliana (Mouse-ear cress)                                |
| LjT34B08.20.nd  | 55  | partial | (Q9FF29) Receptor serine/threonine kinase - Arabidopsis thaliana (Mouse-ear cress)                                   |
| LjT34K24.210.nd | 44  | partial | (O49627) NifU-like protein (Fe-S scaffold protein 1) (AT4g22220/T10I14_50) - Arabidopsis thaliana (Mouse-ear cress)  |
| LjT34L14.50.nc  | 189 | partial | (Q9M551) Polyubiquitin - Populus tremula x Populus tremuloides                                                       |
| LjT35D08.150.nd | 149 | partial | (Q1EMR5) HMG-protein (Fragment) - Plantago major (Common plantain)                                                   |

|                 |     |         |                                                                                                                                                 |
|-----------------|-----|---------|-------------------------------------------------------------------------------------------------------------------------------------------------|
| LjT35D08.70.nd  | 33  | partial | (Q9M024) Hypothetical protein F7A7_20 (At5g01500/F7A7_20) - Arabidopsis thaliana (Mouse-ear cress)                                              |
| LjT35G18.150.nd | 57  | partial | (Q41399) Chalcone reductase - Sesbania rostrata                                                                                                 |
| LjT35M05.30.nd  | 61  | partial | (A2WMQ2) Hypothetical protein - Oryza sativa (indica cultivar-group)                                                                            |
| LjT35M05.40.nd  | 91  | partial | (Q9SHG7) F20D23.22 protein (At1g17080/F6I1.24) (F6I1.24/F6I1.24) - Arabidopsis thaliana (Mouse-ear cress)                                       |
| LjT36B17.170.nd | 85  | partial | (Q494P4) At2g40070 (En/Spm-like transposon protein) - Arabidopsis thaliana (Mouse-ear cress)                                                    |
| LjT36B17.180.nd | 413 | partial | (Q1SJP2) Hypothetical protein - Medicago truncatula (Barrel medic)                                                                              |
| LjT36B17.190.nd | 48  | partial | (Q941F3) AT4g01710/T15B16_22 - Arabidopsis thaliana (Mouse-ear cress)                                                                           |
| LjT36L22.80.nd  | 190 | partial | (Q947E3) Resistance gene analog NBS5 (Fragment) - Helianthus annuus (Common sunflower)                                                          |
| LjT37C05.150.nd | 42  | partial | (Q6IDB3) At3g09860 (Hypothetical protein At3g09860) - Arabidopsis thaliana (Mouse-ear cress)                                                    |
| LjT37D10.290.nd | 62  | partial | (Q9ZQP1) Expressed protein (Hypothetical protein At2g35680) (Putative dual specificity phosphatase) - Arabidopsis thaliana (Mouse-ear cress)    |
| LjT37O09.20.nd  | 54  | partial | (Q8H1A2) Mini-chromosome maintenance protein MCM3 - Pisum sativum (Garden pea)                                                                  |
| LjT37O09.50.nd  | 56  | partial | (A3AVL1) Hypothetical protein - Oryza sativa (japonica cultivar-group)                                                                          |
| LjT38B21.260.nc | 78  | partial | (Q9FY93) NAM-like protein (At5g13180/T19L5_140) - Arabidopsis thaliana (Mouse-ear cress)                                                        |
| LjT38L02.210.nd | 83  | partial | (Q10QN3) 1,4-dihydroxy-2-naphthoate phytyltransferase family protein, expressed (Os03g0190100 protein) - Oryza sativa (japonica cultivar-group) |
| LjT38P01.240.nd | 65  | partial | (Q8RWW3) Hypothetical protein At5g62030 - Arabidopsis thaliana (Mouse-ear cress)                                                                |
| LjT39F13.90.nc  | 89  | partial | (Q94A12) AT5g47880/MCA23_22 - Arabidopsis thaliana (Mouse-ear cress)                                                                            |
| LjT39M07.120.nd | 177 | partial | (Q9LZ24) Hypothetical protein T1E3_90 - Arabidopsis thaliana (Mouse-ear cress)                                                                  |
| LjT39N06.90.nd  | 98  | partial | (Q0WSR2) Putative peroxidase - Arabidopsis thaliana (Mouse-ear cress)                                                                           |
| LjT40J14.130.nc | 57  | partial | (Q1S7V4) Ribosomal protein S3Ae - Medicago truncatula (Barrel medic)                                                                            |
| LjT41B04.50.nd  | 242 | partial | (Q0WU37) Trithorax 3 - Arabidopsis thaliana (Mouse-ear cress)                                                                                   |
| LjT41D10.10.nd  | 119 | partial | (Q1S1V9) Heavy metal transport/detoxification protein - Medicago truncatula (Barrel medic)                                                      |
| LjT41H24.140.nd | 46  | partial | (Q9C805) RNA-binding protein; 68390-68829 - Arabidopsis thaliana (Mouse-ear cress)                                                              |

|                 |     |         |                                                                                                              |
|-----------------|-----|---------|--------------------------------------------------------------------------------------------------------------|
| LjT41H24.230.nd | 38  | partial | (Q9LPI5) F6N18.17 - Arabidopsis thaliana (Mouse-ear cress)                                                   |
| LjT41H24.40.nd  | 46  | partial | (Q9C8M0) RNA-binding protein, putative; 40942-42923 (At1g53650) - Arabidopsis thaliana (Mouse-ear cress)     |
| LjT41H24.50.nd  | 75  | partial | (Q3MB78) Photosystem II reaction centre protein PsbA/D1 - Anabaena variabilis (strain ATCC 29413 / PCC 7937) |
| LjT41N19.100.nd | 51  | partial | (Q1SR63) Blue (Type 1) copper domain - Medicago truncatula (Barrel medic)                                    |
| LjT42G13.110.nd | 229 | partial | (Q7XP86) OSJNBa0021F22.14 protein - Oryza sativa (japonica cultivar-group)                                   |
| LjT42G13.60.nd  | 41  | partial | (Q6RFM6) NADH dehydrogenase subunit F (Fragment) - Rhizoglyphus microsporus                                  |
| LjT43F20.100.nd | 51  | partial | (Q40210) RAB5B - Lotus japonicus                                                                             |
| LjT43K05.100.nd | 46  | partial | (Q659H9) Putative histidine-containing phosphotransfer protein 1 - Populus canadensis (Carolina poplar)      |
| LjT43N20.80.nc  | 62  | partial | (Q1S278) Proteinase inhibitor I13, potato inhibitor I - Medicago truncatula (Barrel medic)                   |
| LjT44F11.60.nd  | 53  | partial | (O49653) Glycoprotein endopeptidase - like protein - Arabidopsis thaliana (Mouse-ear cress)                  |
| LjT44F13.200.nd | 34  | partial | (A3BJ19) Hypothetical protein - Oryza sativa (japonica cultivar-group)                                       |
| LjT44J06.190.nd | 80  | partial | (A3BW27) Hypothetical protein - Oryza sativa (japonica cultivar-group)                                       |
| LjT44J06.20.nd  | 110 | partial | (Q7XTT6) OSJNBa0058K23.17 protein - Oryza sativa (japonica cultivar-group)                                   |
| LjT44J06.200.nd | 35  | partial | (Q7XTT6) OSJNBa0058K23.17 protein - Oryza sativa (japonica cultivar-group)                                   |
| LjT44J06.250.nd | 54  | partial | (A4GGE1) Hypothetical protein ycf2a - Phaseolus vulgaris (Kidney bean) (French bean)                         |
| LjT44J06.270.nd | 50  | partial | (Q9M8X2) T6K12.22 protein - Arabidopsis thaliana (Mouse-ear cress)                                           |
| LjT44L11.100.nd | 68  | partial | (A0MEE7) Hypothetical protein (Fragment) - Arabidopsis thaliana (Mouse-ear cress)                            |
| LjT46A12.10.nd  | 50  | partial | (A3C9G1) Hypothetical protein - Oryza sativa (japonica cultivar-group)                                       |
| LjT46F23.150.nd | 50  | partial | (A2Q5T5) Longin-like - Medicago truncatula (Barrel medic)                                                    |
| LjT46I09.10.nd  | 54  | partial | (Q9LKB1) Uroporphyrinogen decarboxylase (At3g14930) - Arabidopsis thaliana (Mouse-ear cress)                 |
| LjT47B05.130.nd | 102 | partial | (Q5U9E3) Stress kinase (Serine/threonine protein kinase, active site) - Medicago truncatula (Barrel medic)   |

|                  |     |         |                                                                                                                 |
|------------------|-----|---------|-----------------------------------------------------------------------------------------------------------------|
| LjT47D03.200.nd  | 131 | partial | (Q9FL17) Arabidopsis thaliana genomic DNA, chromosome 5, P1 clone:MSN9 - Arabidopsis thaliana (Mouse-ear cress) |
| LjT47D03.90.nd   | 45  | partial | (Q9FLS5) GblAAC80624.1 (NpGUT1 homolog) - Arabidopsis thaliana (Mouse-ear cress)                                |
| LjT47I02.90.nd   | 71  | partial | (A3ADZ9) Hypothetical protein - Oryza sativa (japonica cultivar-group)                                          |
| LjT48C16.10.nd   | 91  | partial | (Q94KU0) ATP8 - Arabidopsis thaliana (Mouse-ear cress)                                                          |
| LjT48C16.120.nd  | 45  | partial | (Q8RXM5) Hypothetical protein At5g47420 - Arabidopsis thaliana (Mouse-ear cress)                                |
| LjSGA_003135.1   | 69  | partial | (Q3EAF1) Protein At3g63460                                                                                      |
| LjSGA_003424.1.1 | 47  | partial | (Q9M0L9) Hypothetical protein AT4g18640                                                                         |
| LjSGA_003590.1.1 | 51  | partial | (Q2HUA6) Pathogenesis-related transcriptional factor and ERF                                                    |
| LjSGA_004063.1   | 45  | partial | (Q5YGP7) PLETHORA2 (At1g51190)                                                                                  |
| LjSGA_004764.2   | 147 | partial | (Q500V5) At1g09320                                                                                              |
| LjSGA_004787.1   | 51  | partial | (O04472) F5I14.8 protein                                                                                        |
| LjSGA_004788.2.1 | 43  | partial | (Q9CA89) Hypothetical protein F19K16.18                                                                         |
| LjSGA_004789.1.1 | 63  | partial | (Q9CA89) Hypothetical protein F19K16.18                                                                         |
| LjSGA_004790.1   | 74  | partial | (Q9CA89) Hypothetical protein F19K16.18                                                                         |
| LjSGA_004953.1   | 59  | partial | (Q2Z1Y8) 1-acyl-sn-glycerol-3-phosphate acyltransferase                                                         |
| LjSGA_004972.2   | 79  | partial | (Q3L0K1) Cysteine proteinase                                                                                    |
| LjSGA_005337.1.1 | 63  | partial | (Q6TNI9) UDP-D-apiose/UDP-D-xylose synthase                                                                     |
| LjSGA_005512.1.1 | 73  | partial | (Q8LEI6) Receptor-like protein kinase                                                                           |
| LjSGA_005728.1   | 46  | partial | (Q3EB73) Protein At3g13080                                                                                      |
| LjSGA_005832.1   | 44  | partial | (Q8RYM1) MRNA-associated protein mrnp41-like                                                                    |
| LjSGA_006300.2   | 247 | partial | (P93716) Tapetum-specific zinc finger protein 1                                                                 |
| LjSGA_006682.1   | 47  | partial | (Q9SYM4) Trehalose-6-phosphate synthase                                                                         |
| LjSGA_006938.1   | 51  | partial | (Q5VRW3) Hypothetical protein P0013F10.15                                                                       |
| LjSGA_007069.1   | 58  | partial | (Q9SSC0) F18B13.27 protein (At1g80190)                                                                          |

|                  |     |         |                                                                                                                                                          |
|------------------|-----|---------|----------------------------------------------------------------------------------------------------------------------------------------------------------|
| LjSGA_007278.2   | 35  | partial | (Q8GXY6) Hypothetical protein At1g05270/YUP8H12_12 (Hypothetical protein At1g05270)                                                                      |
| LjSGA_007491.1   | 66  | partial | (Q9ASU9) At1g07930/T6D22_3                                                                                                                               |
| LjSGA_007535.2   | 61  | partial | (Q6Z7F0) Putative ATP-dependent Clp protease ATP-binding subunit ClpX1 (CLPX)                                                                            |
| LjSGA_007606.1   | 84  | partial | (Q9M0Z3) Putative potassium transporter                                                                                                                  |
| LjSGA_007607.1   | 42  | partial | (Q40541) Protein kinase                                                                                                                                  |
| LjSGA_007607.1.1 | 45  | partial | (Q9FG16) Selenium-binding protein-like                                                                                                                   |
| LjSGA_007638.2   | 39  | partial | (Q4QWQ5) Calmodulin                                                                                                                                      |
| LjSGA_007640.1   | 34  | partial | (Q4QWQ5) Calmodulin                                                                                                                                      |
| LjSGA_007643.1.1 | 76  | partial | (Q30D01) Putative 3-dehydroquinase synthase                                                                                                              |
| LjSGA_008276.1   | 84  | partial | (Q84PE0) AKIN betagamma                                                                                                                                  |
| LjSGA_008284.1   | 69  | partial | (O23544) Hypothetical protein AT4g17000                                                                                                                  |
| LjSGA_008317.1   | 161 | partial | (Q6PEA8) Rnf13 protein (Adult inner ear cDNA, RIKEN full-length enriched library, clone:F930021D16 product:ring finger protein 13, full insert sequence) |
| LjSGA_008438.2.1 | 26  | partial | (Q3EB48) Protein At3g18040                                                                                                                               |
| LjSGA_008480.3   | 53  | partial | (Q93XB9) Bax inhibitor 1                                                                                                                                 |
| LjSGA_008858.1   | 135 | partial | (Q8LPQ5) AT3g18290/MIE15_8                                                                                                                               |
| LjSGA_008862.1   | 51  | partial | (Q8LDI1) Hypothetical protein (Hypothetical protein At3g19900)                                                                                           |
| LjSGA_008876.0.1 | 37  | partial | (Q5VSC2) MutT/nudix protein-like                                                                                                                         |
| LjSGA_009362.2   | 150 | partial | (Q9LXQ8) Hypothetical protein T20N10_290                                                                                                                 |
| LjSGA_009557.1   | 47  | partial | (Q6H7N3) Putative DnaJ homolog, subfamily C, member 9                                                                                                    |
| LjSGA_009597.2   | 83  | partial | (Q336P4) Hypothetical protein                                                                                                                            |
| LjSGA_009597.2.1 | 54  | partial | (Q3KN68) Isoflavone reductase-like protein 5                                                                                                             |
| LjSGA_009600.2   | 211 | partial | (Q67UQ0) Hypothetical protein P0453H04.38                                                                                                                |
| LjSGA_009621.2.1 | 33  | partial | (Q6AUN4) Hypothetical protein OSJNBa0040E06.6 (Hypothetical protein OJ1781_H11.24)                                                                       |
| LjSGA_010300.1   | 153 | partial | (Q41042) Pisum sativum L. (clone na-481-5)                                                                                                               |

|                  |     |         |                                                                                                  |
|------------------|-----|---------|--------------------------------------------------------------------------------------------------|
| LjSGA_010373.1.1 | 40  | partial | (Q5M964) Fumarate hydratase 1                                                                    |
| LjSGA_010569.0.1 | 57  | partial | (O22443) Seed coat peroxidase precursor (EC 1.11.1.7)                                            |
| LjSGA_010583.0.1 | 63  | partial | (Q5M9Z8) NADH dehydrogenase subunit 4                                                            |
| LjSGA_010755.0.1 | 43  | partial | (Q76JK0) Putative class I chitinase (Fragment)                                                   |
| LjSGA_010921.1   | 80  | partial | (Q4PSZ0) Zinc finger (C3HC4-type RING finger) family protein                                     |
| LjSGA_010927.3   | 34  | partial | (Q43NY1) Lipoate-protein ligase B                                                                |
| LjSGA_010951.1   | 52  | partial | (Q5U9D4) Plasma membrane proton ATPase 5                                                         |
| LjSGA_011138.2   | 45  | partial | (Q8LDT5) Hypothetical protein                                                                    |
| LjSGA_011167.1   | 95  | partial | (Q9SW47) Amidase-like protein                                                                    |
| LjSGA_011225.0.1 | 51  | partial | (Q9FIU1) Arabidopsis thaliana genomic DNA, chromosome 5, P1 clone:MRB17 (AT5g54630/MRB17_13)     |
| LjSGA_011455.1   | 47  | partial | (Q66GJ6) At1g05140                                                                               |
| LjSGA_011461.1   | 70  | partial | (Q9SVY1) Zinc finger-like protein (WIP2 protein) (At3g57670)                                     |
| LjSGA_011474.1   | 69  | partial | (Q8S369) GIA/RGA-like gibberellin response modulator (Fragment)                                  |
| LjSGA_011486.1   | 257 | partial | (Q9ZPR3) Hypothetical protein At2g03630                                                          |
| LjSGA_011617.2.1 | 56  | partial | (Q9ZPW5) Putative AAA-type ATPase                                                                |
| LjSGA_011770.1   | 106 | partial | (Q5VRJ9) Putative isp4 protein                                                                   |
| LjSGA_011923.1.1 | 167 | partial | (Q2HUI7) Cyclin-like F-box; FBD; Zinc finger, FYVE/PHD-type                                      |
| LjSGA_011962.1   | 70  | partial | (Q9FMJ6) Similarity to NOI protein                                                               |
| LjSGA_012015.2   | 37  | partial | (Q5N9C8) SPP30-like                                                                              |
| LjSGA_012020.3   | 43  | partial | (Q9FSD7) Kdo-8-phosphate synthase (EC 4.1.2.16) (Fragment)                                       |
| LjSGA_012039.1   | 37  | partial | (Q208T5) Actin depolymerizing factor 2                                                           |
| LjSGA_012074.2   | 62  | partial | (Q948F9) Putative PAP-specific phosphatase                                                       |
| LjSGA_012100.2   | 42  | partial | (Q69L73) Phosphodiesterase/alkaline phosphatase D-like protein                                   |
| LjSGA_012111.1.1 | 48  | partial | (Q9ZQZ2) Putative LRR receptor-linked protein kinase (Putative LRR receptor-like protein kinase) |



|                  |     |         |                                                                                                                             |
|------------------|-----|---------|-----------------------------------------------------------------------------------------------------------------------------|
| LjSGA_012179.1   | 98  | partial | (Q9LPQ6) F15H18.11                                                                                                          |
| LjSGA_012283.1.1 | 51  | partial | (Q9LZA4) Hypothetical protein F8F6_270 (AT5g04060/F8F6_270)                                                                 |
| LjSGA_012286.1   | 161 | partial | (Q5WN03) Hypothetical protein P0001A07.6                                                                                    |
| LjSGA_012298.1   | 83  | partial | (Q2A9K1) Hypothetical protein                                                                                               |
| LjSGA_012425.1   | 160 | partial | (Q40366) Peroxidase precursor                                                                                               |
| LjSGA_012431.2.1 | 37  | partial | (Q6UZD6) Plastidic alpha 1,4-glucan phosphorylase (Fragment)                                                                |
| LjSGA_012444.2   | 60  | partial | (Q8W2G5) Putative alkaline alpha-galactosidase seed imbibition protein                                                      |
| LjSGA_012746.2.1 | 112 | partial | unknown protein                                                                                                             |
| LjSGA_012818.1   | 49  | partial | (Q7XJS0) Putative SET-domain transcriptional regulator                                                                      |
| LjSGA_012861.1   | 44  | partial | (Q9FNZ1) Zfwd2 protein (Fragment)                                                                                           |
| LjSGA_012912.1   | 86  | partial | (O65655) Hypothetical protein AT4g39680                                                                                     |
| LjSGA_012926.2   | 134 | partial | (Q9AT32) Poly(A)-binding protein                                                                                            |
| LjSGA_013001.0.1 | 68  | partial | (Q8L5A6) Putative mitochondrial NAD-dependent malate dehydrogenase                                                          |
| LjSGA_013090.3   | 40  | partial | (Q8GTE2) Ribosomal protein RL5                                                                                              |
| LjSGA_013105.1   | 101 | partial | (Q8GY67) Hypothetical protein At1g23340/F26F24_11 (At1g23340)                                                               |
| LjSGA_013134.1   | 66  | partial | (Q6Z4N3) Putative thioredoxin                                                                                               |
| LjSGA_013141.2   | 62  | partial | (Q6F369) Hypothetical protein OJ1268_B08.13                                                                                 |
| LjSGA_013159.3   | 74  | partial | (Q9FVZ9) Steroid membrane binding protein, putative                                                                         |
| LjSGA_013231.1.1 | 70  | partial | (Q8LNT4) N-acetyl-gamma-glutamyl-phosphate reductase, putative                                                              |
| LjSGA_013239.2.1 | 58  | partial | (Q8GYH7) Hypothetical protein At3g15150/F4B12_6                                                                             |
| LjSGA_013322.0.1 | 73  | partial | (Q94AA4) AT4g26270/T25K17_80                                                                                                |
| LjSGA_013430.1   | 44  | partial | (Q9LDU3) Arabidopsis thaliana genomic DNA, chromosome 3, P1 clone: MJK13 (MJK13.9 protein) (Hypothetical protein At3g15430) |
| LjSGA_013604.1   | 61  | partial | (Q9LIP9) Glutamine-fructose-6-phosphate transaminase 2                                                                      |
| LjSGA_013618.2   | 46  | partial | (Q67YC0) Hypothetical protein At1g73010                                                                                     |

|                  |     |         |                                                                                                         |
|------------------|-----|---------|---------------------------------------------------------------------------------------------------------|
| LjSGA_013691.2   | 66  | partial | (Q9FI59) GblAAD29063.1                                                                                  |
| LjSGA_013828.2   | 48  | partial | (Q9SEW3) Receptor-like protein kinase (Fragment)                                                        |
| LjSGA_013942.0.1 | 55  | partial | (Q49KT4) Ribosomal protein L2                                                                           |
| LjSGA_013991.1   | 79  | partial | (Q6K204) Hypothetical protein B1469H02.35                                                               |
| LjSGA_014090.1   | 66  | partial | (Q9FIL1) Protein kinase-like protein (AT5g59010/k19m22_210)                                             |
| LjSGA_014133.2   | 71  | partial | (Q9MM55) Cytochrome oxidase subunit 2                                                                   |
| LjSGA_014134.2   | 72  | partial | (Q9FR27) Hexokinase (EC 2.7.1.1)                                                                        |
| LjSGA_014307.2.1 | 40  | partial | (Q45NN8) Hydroxyacylglutathione hydrolase (Fragment)                                                    |
| LjSGA_014494.1   | 56  | partial | (Q2QLR6) Transposable element protein, putative                                                         |
| LjSGA_014557.1.2 | 38  | partial | (Q6I664) HD-ZIP protein (Fragment)                                                                      |
| LjSGA_014576.2   | 107 | partial | (Q75LJ3) Putative flavoprotein alpha-subunit, having alternative splicing products                      |
| LjSGA_014664.1   | 34  | partial | (Q6Z2M5) Putative small nuclear ribonucleoprotein polypeptide E                                         |
| LjSGA_014812.1.1 | 54  | partial | (Q5W915) UDP-sugar pyrophosphorylase                                                                    |
| LjSGA_014982.1.1 | 54  | partial | (Q8LPN7) AT3g19950/MPN9_19                                                                              |
| LjSGA_014994.0.2 | 54  | partial | (Q9SLZ4) Retinoblastoma-related protein                                                                 |
| LjSGA_015431.1   | 192 | partial | (Q9FME7) Kinesin-like protein                                                                           |
| LjSGA_015476.0.1 | 46  | partial | (Q9XI87) F7A19.9 protein                                                                                |
| LjSGA_015514.1   | 70  | partial | (Q9SIV8) Putative CDC21 protein                                                                         |
| LjSGA_015566.1.1 | 93  | partial | (O49279) F22K20.2 protein (At1g76920) (F-box protein AtFBX3) (Hypothetical protein At1g76920; F22K20.2) |
| LjSGA_015629.0.1 | 46  | partial | (Q84XA4) Aminoimidazolecarboximide ribonucleotide transformylase/inosine monophosphate cyclohydrolase   |
| LjSGA_015674.0.1 | 48  | partial | (Q9C584) Hypothetical protein At5g22040                                                                 |
| LjSGA_015734.0.1 | 46  | partial | (Q9FZJ7) F17L21.17 (Hypothetical protein) (Hypothetical protein At1g27385/F17L21.17)                    |
| LjSGA_015821.1   | 41  | partial | (Q5JJI4) Putative TOM20                                                                                 |

|                  |     |         |                                                                                    |
|------------------|-----|---------|------------------------------------------------------------------------------------|
| LjSGA_015831.1   | 44  | partial | (Q9M4H0) Putative ripening-related protein                                         |
| LjSGA_015880.1   | 231 | partial | (Q9MAL4) F27F5.2                                                                   |
| LjSGA_015963.1.1 | 80  | partial | (Q84VX5) At4g02100                                                                 |
| LjSGA_015981.2   | 157 | partial | (Q27335) Poly(A)-binding protein, putative                                         |
| LjSGA_016013.1   | 59  | partial | (Q6Z6M5) Putative syntaxin-related protein(Knolle)                                 |
| LjSGA_016030.0.1 | 50  | partial | (Q2QLM1) Hypothetical protein                                                      |
| LjSGA_016062.0.1 | 35  | partial | (Q5VPE9) Leucine carboxyl methyltransferase family protein-like                    |
| LjSGA_016117.1   | 70  | partial | (Q6WB92) Enolase                                                                   |
| LjSGA_016294.2   | 44  | partial | (Q30CZ7) Putative chorismate synthase                                              |
| LjSGA_016300.3   | 64  | partial | (Q9LHW0) Putative esterase                                                         |
| LjSGA_016325.1   | 53  | partial | (Q7F808) Similar to Arabidopsis thaliana hypothetical protein T16H5.200            |
| LjSGA_016371.1.1 | 64  | partial | (O82471) Protein phosphatase-2C                                                    |
| LjSGA_016392.3   | 55  | partial | (Q84TV1) Nodulin-like protein                                                      |
| LjSGA_016393.2   | 73  | partial | (Q9AYN8) NRK1 MAPK                                                                 |
| LjSGA_016408.1.1 | 51  | partial | (Q67VQ4) BolA-like                                                                 |
| LjSGA_016410.2   | 140 | partial | (Q940J7) Hypothetical protein                                                      |
| LjSGA_016412.2   | 54  | partial | (Q6YTS7) Hypothetical protein P0419H09.23                                          |
| LjSGA_016418.1   | 74  | partial | (Q9SF45) Putative oxidoreductase                                                   |
| LjSGA_016443.1.1 | 59  | partial | (Q5ZAM8) Putative prolylcarboxypeptidase, isoform 1                                |
| LjSGA_016474.1   | 58  | partial | (Q9SIM4) 60S ribosomal protein L14                                                 |
| LjSGA_016533.2.1 | 124 | partial | (Q9FWT4) F1B16.1 protein (Putative protease) (Protease, putative)                  |
| LjSGA_016550.1.1 | 88  | partial | (Q9FIN6) GblAAD32909.1                                                             |
| LjSGA_016567.2   | 76  | partial | (Q9SHG6) Similar to tuftelin-interacting protein                                   |
| LjSGA_016645.1   | 72  | partial | (Q9FFZ0) Similarity to unknown protein (Hypothetical protein) (AT5g13810/MAC12_24) |
| LjSGA_016749.1.1 | 131 | partial | (O23020) T1G11.10 protein                                                          |

|                  |     |         |                                                                                                           |
|------------------|-----|---------|-----------------------------------------------------------------------------------------------------------|
| LjSGA_016860.1.1 | 33  | partial | (Q9C976) Hypothetical protein F5I6.3 (Hypothetical protein At1g80280)                                     |
| LjSGA_016862.2   | 73  | partial | (Q9LYD6) Hypothetical protein F15N18_150                                                                  |
| LjSGA_016906.1.1 | 34  | partial | (Q2MIJ5) DNA-directed RNA polymerase (EC 2.7.7.6)                                                         |
| LjSGA_016982.1   | 90  | partial | (Q70CE8) Ankyrin-repeat protein (Fragment)                                                                |
| LjSGA_017021.1   | 37  | partial | (Q7XWP1) OSJNBa0032B23.5 protein                                                                          |
| LjSGA_017062.1   | 41  | partial | (Q71G33) COP8-like protein                                                                                |
| LjSGA_017166.1   | 49  | partial | (Q69P78) Putative serine protease                                                                         |
| LjSGA_017195.1   | 41  | partial | (O23024) T1G11.14 protein (Flavin-containing monooxygenase YUCCA3) (At1g04610)                            |
| LjSGA_017266.0.1 | 47  | partial | (Q8H0U0) T-complex polypeptide 1 homologue                                                                |
| LjSGA_017271.1.1 | 53  | partial | (Q541Y5) Putative villin                                                                                  |
| LjSGA_017303.0.1 | 76  | partial | (Q5JN27) Putative receptor-like protein kinase 1                                                          |
| LjSGA_017402.1   | 47  | partial | (Q8H1T4) Putative cleavage and polyadenylation specificity factor 160 kDa subunit                         |
| LjSGA_017442.2   | 48  | partial | (Q9SQK0) Aldehyde reductase                                                                               |
| LjSGA_017510.1   | 101 | partial | (Q43180) Fumarase (EC 4.2.1.2)                                                                            |
| LjSGA_017551.1   | 38  | partial | (Q5VS25) Putative beta 1,3 glucan synthase                                                                |
| LjSGA_017714.1.2 | 44  | partial | (Q8LP18) Cullin-like protein1                                                                             |
| LjSGA_017718.1   | 112 | partial | (Q67XZ2) Hypothetical protein At1g48040                                                                   |
| LjSGA_017774.1   | 92  | partial | (Q2HW14) Zinc finger, CCCH-type; Sugar transporter superfamily                                            |
| LjSGA_017795.0.1 | 42  | partial | (Q8W4M2) Hypothetical protein F5K20.24                                                                    |
| LjSGA_017812.1   | 57  | partial | (Q8L5Q0) Putative invertase inhibitor (Fragment)                                                          |
| LjSGA_017968.1   | 61  | partial | (Q42606) Uroporphyrin III methylase (EC 2.1.1.107) (AT5g40850/MHK7_8)                                     |
| LjSGA_018018.1   | 41  | partial | (Q9LIH7) Arabidopsis thaliana genomic DNA, chromosome 3, TAC clone:K24M9 (Hypothetical protein At3g18620) |
| LjSGA_018122.2   | 127 | partial | (Q9FHC3) Genomic DNA, chromosome 5, TAC clone:K24M7 (Hypothetical protein At5g52370)                      |
| LjSGA_018152.1.1 | 47  | partial | (Q94JV2) AT3g27050/MOJ10_14                                                                               |

|                  |     |         |                                                                                    |
|------------------|-----|---------|------------------------------------------------------------------------------------|
| LjSGA_018233.1   | 56  | partial | (Q5Z6U5) Putative CCT chaperonin gamma subunit                                     |
| LjSGA_018315.1   | 101 | partial | (Q9SZP7) Disease resistance response like protein                                  |
| LjSGA_018346.1   | 106 | partial | (Q7XDY0) Transposon protein, putative, unclassified                                |
| LjSGA_018438.2   | 48  | partial | (Q3N2E7) Ribosomal protein L18                                                     |
| LjSGA_018538.1   | 48  | partial | (Q84Z07) Putative WD repeat protein                                                |
| LjSGA_018653.1   | 63  | partial | (Q9ZW93) F5A8.5 protein                                                            |
| LjSGA_018658.1   | 45  | partial | (Q7XTK0) OSJNBa0020P07.4 protein                                                   |
| LjSGA_018818.1   | 387 | partial | (Q6YUC5) Aminotransferase-like protein                                             |
| LjSGA_018826.1   | 94  | partial | (Q9LEP6) Hypothetical protein                                                      |
| LjSGA_019062.1.1 | 53  | partial | (Q3SCM6) Cinnamoyl-CoA reductase                                                   |
| LjSGA_019205.1   | 40  | partial | (Q94LX6) Putative FPPsynthase1 (Fragment)                                          |
| LjSGA_019215.2   | 63  | partial | (Q33B71) Lipase, putative                                                          |
| LjSGA_019347.0.1 | 61  | partial | (Q9SAI6) F23A5.7                                                                   |
| LjSGA_019361.3   | 68  | partial | (Q9CAE3) Hypothetical protein F13M14.34 (Flowering locus D)                        |
| LjSGA_019537.1   | 47  | partial | (Q9LJE4) GloEL protein; chaperonin, 60 kDa                                         |
| LjSGA_019850.1   | 107 | partial | (Q8GY73) Hypothetical protein At2g42950                                            |
| LjSGA_019856.0.1 | 35  | partial | (Q9SX85) F16N3.18 protein                                                          |
| LjSGA_019881.3   | 111 | partial | (Q3E9E3) Protein At5g18700                                                         |
| LjSGA_019892.1.1 | 66  | partial | (Q9SRP6) T21P5.16 protein (Hypothetical protein At3g03420)                         |
| LjSGA_019985.1   | 46  | partial | (O65606) Hypothetical protein M7J2.80                                              |
| LjSGA_020010.1   | 46  | partial | (Q7XI67) Hypothetical protein P0034A04.101-1 (Hypothetical protein P0597G07.131-1) |
| LjSGA_020100.1.1 | 57  | partial | (Q9ZR45) Alpha-N-acetylglucosaminidase                                             |
| LjSGA_020183.1   | 52  | partial | (Q9SY80) F14N23.26                                                                 |
| LjSGA_020235.1   | 113 | partial | (Q9XF99) Skp1 (Fragment)                                                           |
| LjSGA_020245.2   | 287 | partial | (Q6H443) Putative plastid-specific ribosomal protein 2                             |

|                  |     |         |                                                                                    |
|------------------|-----|---------|------------------------------------------------------------------------------------|
| LjSGA_020339.1   | 50  | partial | (Q7XKV2) OSJNBa0022H21.5 protein                                                   |
| LjSGA_020422.1   | 113 | partial | (Q2HUJ7) V-ATPase subunit C                                                        |
| LjSGA_020458.1   | 149 | partial | (Q9LIV4) Hypothetical protein                                                      |
| LjSGA_020558.0.1 | 95  | partial | (Q8VYN6) Putative pyrophosphate-fructose-6-phosphate 1-phosphotransferase          |
| LjSGA_020559.2   | 75  | partial | (Q7XW27) OSJNBb0062H02.4 protein                                                   |
| LjSGA_020560.1.1 | 57  | partial | (Q7XJM5) Putative transcription factor IIIB 70 KD subunit (TFIIIB)                 |
| LjSGA_020568.1   | 81  | partial | (Q6UD74) LysM domain-containing receptor-like kinase 7                             |
| LjSGA_020642.2   | 47  | partial | (Q7X864) OSJNBa0093F12.4 protein (OSJNBa0006A01.22 protein)                        |
| LjSGA_020705.1   | 79  | partial | (Q5N909) AT hook motif-containing protein-like                                     |
| LjSGA_020800.1   | 85  | partial | (Q8LK24) SOS2-like protein kinase                                                  |
| LjSGA_020832.1   | 78  | partial | (Q5YLB4) DNA gyrase B subunit                                                      |
| LjSGA_020853.1   | 46  | partial | (Q9FFZ0) Similarity to unknown protein (Hypothetical protein) (AT5g13810/MAC12_24) |
| LjSGA_020950.1.1 | 67  | partial | (Q9ZTA8) Homeodomain protein (Fragment)                                            |
| LjSGA_020964.1   | 71  | partial | (Q9LVU6) RNA-binding protein-like                                                  |
| LjSGA_021085.2   | 102 | partial | (Q621R2) Hypothetical protein CBG02383                                             |
| LjSGA_021212.1   | 82  | partial | (Q9LJQ5) Seed maturation protein-like (At3g18260)                                  |
| LjSGA_021298.1   | 78  | partial | (Q851E0) Hypothetical protein OSJNBb0021P10.2                                      |
| LjSGA_021328.2   | 74  | partial | (Q9LNC6) F9P14.7 protein (At1g06210/F9P14_4)                                       |
| LjSGA_021348.1   | 41  | partial | (Q2QNB5) Suppressor of forked protein                                              |
| LjSGA_021514.2   | 71  | partial | (Q84TV1) Nodulin-like protein                                                      |
| LjSGA_021615.1.1 | 47  | partial | (Q3E9V2) Protein At4g28088                                                         |
| LjSGA_021635.2   | 53  | partial | (Q9LIR8) GblAAF30317.1 (Hypothetical protein At3g23880/F14O13_7) (At3g23880)       |
| LjSGA_021669.1   | 90  | partial | (Q9C5K6) Hypothetical protein At1g34150                                            |
| LjSGA_021767.1   | 65  | partial | (Q75G50) Hypothetical protein B1003C08.7 (Hypothetical protein OSJNBb0043H23.5)    |
| LjSGA_021794.1   | 310 | partial | (O97767) RBM1                                                                      |

|                  |     |         |                                                                |
|------------------|-----|---------|----------------------------------------------------------------|
| LjSGA_021834.1   | 69  | partial | (Q9FMP7) Genomic DNA, chromosome 5, P1 clone:MXC9 (At5g12160)  |
| LjSGA_021891.1   | 61  | partial | (Q8H1A3) Mini-chromosome maintenance protein MCM6              |
| LjSGA_021906.1   | 88  | partial | (O64587) Hypothetical protein At2g34690                        |
| LjSGA_022139.1   | 108 | partial | (Q8RWE2) Trehalose-6-phosphate phosphatase (At5g51460)         |
| LjSGA_022279.1.1 | 38  | partial | (Q9ZVT4) F15K9.7 protein                                       |
| LjSGA_022684.1   | 122 | partial | (Q70YP7) Leafy cotyledon protein (Fragment)                    |
| LjSGA_022708.1   | 45  | partial | (Q6L8U1) Auxin response factor 3                               |
| LjSGA_022732.1.1 | 69  | partial | (Q8VYN8) Hypothetical protein At4g25170 (Hypothetical protein) |
| LjSGA_022836.1   | 58  | partial | (Q8H808) Hypothetical protein OJ1743A09.20                     |
| LjSGA_022989.1   | 49  | partial | (Q9SGE3) T23G18.3 (T6D22.26) (Histone H2B family protein)      |
| LjSGA_023044.2   | 38  | partial | (Q8RW11) Putative glycine rich protein                         |
| LjSGA_023080.1   | 88  | partial | (Q541V7) Hypothetical protein At2g24330                        |
| LjSGA_023272.1.1 | 71  | partial | (Q9ZTA8) Homeodomain protein (Fragment)                        |
| LjSGA_023290.1   | 93  | partial | (Q8L4G8) C4-dicarboxylate transporter-like protein             |
| LjSGA_023309.1   | 114 | partial | (Q6WB92) Enolase                                               |
| LjSGA_023481.1   | 119 | partial | (Q5N7S6) Receptor serine/threonine kinase PR5K-like            |
| LjSGA_023506.1.1 | 134 | partial | (Q2HS67) F-box associated, putative                            |
| LjSGA_023559.1   | 64  | partial | (Q9FGH9) Leucine zipper protein (AT5g58430/mqj2_20)            |
| LjSGA_023585.2   | 70  | partial | (Q7X7E9) OSJNBa0035M09.8 protein                               |
| LjSGA_023624.0.1 | 44  | partial | (Q39890) Calmodulin                                            |
| LjSGA_023686.2   | 119 | partial | (Q8L8M4) Hypothetical protein (At5g20935)                      |
| LjSGA_023844.1   | 45  | partial | (Q2V2T2) Protein AtMg01320 (Protein AtMg00285)                 |
| LjSGA_023881.1   | 71  | partial | (Q9SKD8) Expressed protein (At2g46420/F11C10.11)               |
| LjSGA_023897.2   | 154 | partial | (Q9FPL0) Magnesium transporter protein                         |
| LjSGA_023913.2   | 100 | partial | (Q2HSF1) WD40-like                                             |

|                  |     |         |                                                                                                          |
|------------------|-----|---------|----------------------------------------------------------------------------------------------------------|
| LjSGA_024064.1   | 36  | partial | (Q652F0) Putative ribonucleotide reductase R2                                                            |
| LjSGA_024208.2   | 262 | partial | (Q9LEU3) Zinc finger-like protein                                                                        |
| LjSGA_024216.1   | 60  | partial | (Q8LCM8) Transcription factor TINY, putative                                                             |
| LjSGA_024359.1   | 81  | partial | (Q9S9Q4) F26G16.7 protein                                                                                |
| LjSGA_024362.1   | 35  | partial | (Q69SU8) Putative tetratricopeptide repeat (TPR)-containing protein                                      |
| LjSGA_024636.2   | 35  | partial | (Q3EAG1) Protein At3g61870                                                                               |
| LjSGA_024708.0.1 | 35  | partial | (Q20CB3) Geranyl diphosphate synthase (Fragment)                                                         |
| LjSGA_024712.1   | 155 | partial | (Q9LTZ4) GblAAF01554.1 (Hypothetical protein At3g27350)                                                  |
| LjSGA_024759.1   | 88  | partial | (Q6K8D7) DNAJ heat shock N-terminal domain-containing protein-like                                       |
| LjSGA_024943.0.1 | 49  | partial | (Q6DUX2) Regulator of gene silencing                                                                     |
| LjSGA_025019.2   | 48  | partial | (Q6T7C9) Fiber dTDP-glucose 4-6-dehydratase (Fragment)                                                   |
| LjSGA_025102.1   | 142 | partial | (Q6K7P0) Putative DNA-binding protein PD3, chloroplast                                                   |
| LjSGA_025173.0.1 | 37  | partial | (Q5DW42) Phototropin                                                                                     |
| LjSGA_025273.1   | 68  | partial | (Q9FNK3) Arabidopsis thaliana genomic DNA, chromosome 5, P1 clone:MCL19 (Hypothetical protein At5g46190) |
| LjSGA_025310.1   | 153 | partial | (Q9MBD3) Sa-RNase precursor                                                                              |
| LjSGA_025379.2   | 51  | partial | (Q84N01) Putative sucrose-H <sup>+</sup> symporter (Fragment)                                            |
| LjSGA_025597.1.1 | 92  | partial | (Q9FPM4) Myosin subfamily VIII heavy chain                                                               |
| LjSGA_025670.1   | 42  | partial | (Q75GV0) Putative leucine-rich repeat receptor kinase (Leucine Rich Repeat, putative)                    |
| LjSGA_025698.1.1 | 56  | partial | (Q8H811) Putative leucine-rich repeat transmembrane protein kinase                                       |
| LjSGA_025699.1   | 35  | partial | (Q75KW5) Expressed protein                                                                               |
| LjSGA_025787.0.1 | 114 | partial | (Q3ECK2) Protein At1g62680                                                                               |
| LjSGA_025933.1.1 | 124 | partial | (Q9CA80) Hypothetical protein F1M20.1                                                                    |
| LjSGA_025957.1   | 54  | partial | (Q9M6R8) MAP kinase PsMAPK2                                                                              |
| LjSGA_026008.1   | 407 | partial | (Q2HUI3) Hypothetical protein                                                                            |



|                  |     |         |                                                                                      |
|------------------|-----|---------|--------------------------------------------------------------------------------------|
| LjSGA_026043.1   | 69  | partial | (Q3E9C1) Protein At5g19330                                                           |
| LjSGA_026044.1   | 81  | partial | (Q6Z8U6) Putative glutathione transporter                                            |
| LjSGA_026072.2   | 98  | partial | (Q9MAI7) F12M16.4                                                                    |
| LjSGA_026097.1   | 38  | partial | (Q8LJS0) Hypothetical protein                                                        |
| LjSGA_026117.0.1 | 52  | partial | (Q6S4J3) Endo-beta-1,3-glucanase (Fragment)                                          |
| LjSGA_026117.1.1 | 84  | partial | (Q9ZP12) Glucan endo-1,3-beta-d-glucosidase precursor (EC 3.2.1.39)                  |
| LjSGA_026166.2   | 91  | partial | (Q6XQM5) Nicotinate phosphoribosyltransferase-like protein                           |
| LjSGA_026169.1   | 89  | partial | (Q9LJW5) GblAAF15936.1 (At3g28917) (Hypothetical protein)                            |
| LjSGA_026241.3   | 73  | partial | (Q9XH70) Hypothetical protein p69RF (Fragment)                                       |
| LjSGA_026248.2   | 48  | partial | (Q8W0W5) Repressor protein                                                           |
| LjSGA_026304.1   | 42  | partial | (Q6F2T2) Hypothetical protein OSJNBa0027N19.10                                       |
| LjSGA_026466.1   | 61  | partial | (Q9XFL3) Peroxidase 1 (Fragment)                                                     |
| LjSGA_026521.1   | 70  | partial | (Q94BZ0) At1g50450/F11F12_20                                                         |
| LjSGA_026592.1   | 68  | partial | (Q3E6T0) Protein At5g25400                                                           |
| LjSGA_026636.2   | 124 | partial | (Q5ZD87) HcrVf2 protein-like                                                         |
| LjSGA_026697.1.1 | 37  | partial | (Q9C9B9) Hypothetical protein F2P9.15 (At1g73980/F2P9_15)                            |
| LjSGA_026891.2   | 128 | partial | (Q501C5) At4g38110                                                                   |
| LjSGA_027034.1   | 44  | partial | (Q9SRZ5) F12P19.11                                                                   |
| LjSGA_027040.1   | 272 | partial | (Q9LF31) Hypothetical protein T20K14_120                                             |
| LjSGA_027083.1   | 61  | partial | (Q8LA45) Hypothetical protein                                                        |
| LjSGA_027102.1   | 40  | partial | (Q2R0W7) Phosphoserine phosphatase SerB, putative                                    |
| LjSGA_027116.1   | 91  | partial | (Q8GX Y6) Hypothetical protein At1g05270/YUP8H12_12 (Hypothetical protein At1g05270) |
| LjSGA_027170.1   | 59  | partial | (Q94EA5) Hypothetical protein P0435H01.32                                            |
| LjSGA_027265.1   | 60  | partial | (Q69WR1) Putative IDN3 protein isoform A                                             |
| LjSGA_027354.2   | 135 | partial | (Q8LM38) Putative nucleosid phosphatase (GDA1/CD39 family, putative)                 |

|                  |     |         |                                                                                                             |
|------------------|-----|---------|-------------------------------------------------------------------------------------------------------------|
| LjSGA_027409.1   | 60  | partial | (Q2PEQ5) Hypothetical protein                                                                               |
| LjSGA_027473.1   | 51  | partial | (Q8W0W5) Repressor protein                                                                                  |
| LjSGA_027581.0.1 | 40  | partial | (Q9ZST9) Tic22                                                                                              |
| LjSGA_027601.1   | 56  | partial | (O24430) Calmodulin-like domain protein kinase isoenzyme beta                                               |
| LjSGA_027615.2   | 93  | partial | (Q9SF44) Putative pathogenesis-related protein                                                              |
| LjSGA_027695.1.1 | 42  | partial | (Q9FNK3) Arabidopsis thaliana genomic DNA, chromosome 5, P1 clone:MCL19 (Hypothetical protein At5g46190)    |
| LjSGA_027780.2   | 58  | partial | (Q5DVT3) Tonoplast intrinsic protein 1;2                                                                    |
| LjSGA_027843.1   | 45  | partial | (O24297) Phospholipase C                                                                                    |
| LjSGA_027862.2.1 | 53  | partial | (Q9ZU41) Predicted by genscan and genefinder (At2g01260)                                                    |
| LjSGA_027907.1   | 64  | partial | (Q9XGC6) Adenosine kinase (Fragment)                                                                        |
| LjSGA_027919.1   | 42  | partial | (Q2QPD4) Phenylalanyl-tRNA synthetase                                                                       |
| LjSGA_027929.1   | 52  | partial | (Q9SXL4) Histidine kinase 1                                                                                 |
| LjSGA_028013.1   | 56  | partial | (Q6ZB67) Hypothetical protein OJ1119_B10.8                                                                  |
| LjSGA_028028.1   | 57  | partial | (Q8GS60) Hypothetical protein At1g04620 (Hypothetical protein At1g04620/T1G11_12)                           |
| LjSGA_028199.2   | 47  | partial | (Q93WX4) Suppressor of K <sup>+</sup> transport growth defect-like protein (Fragment)                       |
| LjSGA_028201.1   | 134 | partial | (Q9FUB4) PRLI-interacting factor A (Fragment)                                                               |
| LjSGA_028272.1.1 | 54  | partial | (Q9M9E5) F3F9.21                                                                                            |
| LjSGA_028307.1   | 59  | partial | (Q7X7H3) OSJNBa0084K20.14 protein (OSJNBa0076N16.12 protein)                                                |
| LjSGA_028314.2   | 50  | partial | (Q9SRT9) Reversibly glycosylated polypeptide-1 (At3g02230)                                                  |
| LjSGA_028328.2.1 | 35  | partial | (Q8S350) Auxin-induced SAUR-like protein (Fragment)                                                         |
| LjSGA_028437.1   | 36  | partial | (Q5XLE1) Immunophilin                                                                                       |
| LjSGA_028439.0.2 | 48  | partial | (Q2V2T2) Protein AtMg01320 (Protein AtMg00285)                                                              |
| LjSGA_028446.1   | 82  | partial | (O23297) Hypothetical protein dl3245w (Hypothetical protein AT4g14410) (Putative bHLH transcription factor) |

|                  |     |         |                                                                                  |
|------------------|-----|---------|----------------------------------------------------------------------------------|
| LjSGA_028458.1.1 | 109 | partial | (Q7X9H7) MADS-box protein AGL62                                                  |
| LjSGA_028460.1   | 77  | partial | (Q9AQZ5) Putative heat shock protein                                             |
| LjSGA_028569.1   | 107 | partial | (Q8S7I7) Putative NAM (No apical meristem) protein (Putative NAC domain protein) |
| LjSGA_028691.2   | 95  | partial | (Q84LE6) RelA-SpoT like protein RSH4 (Fragment)                                  |
| LjSGA_028784.2   | 85  | partial | (Q9SK32) Expressed protein                                                       |
| LjSGA_028862.1   | 62  | partial | (Q9SR92) T16O11.14 protein (Putative rhodanese family protein)                   |
| LjSGA_028958.2   | 47  | partial | (Q5Q0I8) Hypothetical protein                                                    |
| LjSGA_028975.1   | 85  | partial | (Q7X9A9) Beta-primeverosidase (EC 3.2.1.149)                                     |
| LjSGA_029024.1   | 67  | partial | (Q9SI58) Putative nonsense-mediated mRNA decay protein                           |
| LjSGA_029050.1   | 67  | partial | (Q9XFI7) Peroxidase (Fragment)                                                   |
| LjSGA_029066.1.1 | 44  | partial | (Q6XQM5) Nicotinate phosphoribosyltransferase-like protein                       |
| LjSGA_029102.2   | 82  | partial | (Q9S7I5) Ribosomal RNA apurinic site specific lyase                              |
| LjSGA_029164.1.1 | 51  | partial | (Q7XPL1) OSJNBa0085110.15 protein                                                |
| LjSGA_029293.0.1 | 40  | partial | (O63067) Aspartokinase-homoserine dehydrogenase (EC 2.7.2.4) (EC 1.1.1.3)        |
| LjSGA_029340.2   | 136 | partial | (Q9FG61) Protein phosphatase-2C PP2C-like                                        |
| LjSGA_029412.0.1 | 46  | partial | (Q42606) Uroporphyrin III methylase (EC 2.1.1.107) (AT5g40850/MHK7_8)            |
| LjSGA_029417.1   | 138 | partial | (Q9S7P3) Kinesin-like protein                                                    |
| LjSGA_029429.1   | 68  | partial | (Q69TX8) Putative transmembrane protein Tmp21                                    |
| LjSGA_029436.1   | 158 | partial | (Q2MJS0) MYB transcription factor                                                |
| LjSGA_029471.0.1 | 50  | partial | (Q8VYG2) Putative galactokinase                                                  |
| LjSGA_029748.1   | 102 | partial | (Q93XA7) NAC domain protein NAC1                                                 |
| LjSGA_029940.1   | 72  | partial | (Q653N8) ThiF family protein-like                                                |
| LjSGA_029943.1.1 | 30  | partial | (Q5DW42) Phototropin                                                             |
| LjSGA_029979.1   | 49  | partial | (Q2HTW0) Myb, DNA-binding                                                        |
| LjSGA_030102.1   | 66  | partial | (Q9LFT2) Hypothetical protein F1N13_20 (Hypothetical protein At5g15880)          |

|                  |     |         |                                                                                                             |
|------------------|-----|---------|-------------------------------------------------------------------------------------------------------------|
| LjSGA_030122.2   | 146 | partial | (Q7M4Q5) Basic proline-rich peptide IB-8a (Fragments)                                                       |
| LjSGA_030315.1   | 52  | partial | (Q5D875) Calcium-dependent protein kinase CDPK1444                                                          |
| LjSGA_030331.1   | 262 | partial | (Q5VME8) Putative ring finger protein 126 isoform 1                                                         |
| LjSGA_030437.1   | 73  | partial | (Q2V3E1) Protein At4g27745                                                                                  |
| LjSGA_030457.1   | 103 | partial | (Q9C662) Hypothetical protein F28B23.15                                                                     |
| LjSGA_030458.1   | 395 | partial | (Q6K6E5) Aminotransferase-like protein                                                                      |
| LjSGA_030577.1   | 71  | partial | (Q7XR01) OSJNBa0015K02.12 protein                                                                           |
| LjSGA_030660.1.1 | 97  | partial | (Q9LYP2) Hypothetical protein T28J14_180 (Hypothetical protein At5g07240)                                   |
| LjSGA_030675.2   | 95  | partial | (Q7XUB3) OSJNBb0032E06.7 protein                                                                            |
| LjSGA_030819.1   | 99  | partial | (Q84LQ3) Putative FtsH protease                                                                             |
| LjSGA_030914.1   | 48  | partial | (Q8RYX0) Pentatricopeptide (PPR) repeat-containing protein-like                                             |
| LjSGA_030934.1   | 94  | partial | (Q8SUM5) Hypothetical protein ECU08_1410                                                                    |
| LjSGA_030963.2   | 59  | partial | (Q9SU03) Hydrolase-like protein                                                                             |
| LjSGA_030994.1   | 92  | partial | (Q8H1F1) Hypothetical protein At3g15160                                                                     |
| LjSGA_031018.2   | 43  | partial | (Q3E6X2) Protein At2g01260                                                                                  |
| LjSGA_031063.0.1 | 52  | partial | (Q5ZDI8) Hypothetical protein P0686E09.31                                                                   |
| LjSGA_031097.1   | 51  | partial | (Q8RZK9) Putative ARF GAP-like zinc finger-containing protein ZiGA4                                         |
| LjSGA_031101.0.1 | 25  | partial | (Q2Z2G4) AINTEGUMENTA-like protein                                                                          |
| LjSGA_031147.1   | 50  | partial | (Q4TYZ7) Ubiquitinating enzyme                                                                              |
| LjSGA_031181.1   | 60  | partial | (Q3LHL0) TATA binding protein associated factor                                                             |
| LjSGA_031270.1   | 56  | partial | (Q8S8N6) Expressed protein (Hypothetical protein At2g06925) (Phospholipase A2 alpha) (Hypothetical protein) |
| LjSGA_031412.1   | 34  | partial | (Q9SF20) F26K24.7 protein (Hypothetical protein At3g11780)                                                  |
| LjSGA_031481.1   | 82  | partial | (Q7XMI6) OSJNBb0006N15.13 protein                                                                           |
| LjSGA_031521.1.1 | 106 | partial | (Q9FL41) MtN21 nodulin protein-like                                                                         |

|                  |     |         |                                                                                   |
|------------------|-----|---------|-----------------------------------------------------------------------------------|
| LjSGA_031564.1   | 107 | partial | (Q9NHW2) Flagelliform silk protein (Fragment)                                     |
| LjSGA_031586.0.1 | 81  | partial | (Q2PMM8) Hypothetical chloroplast RF1                                             |
| LjSGA_031654.1   | 190 | partial | (Q7XUR1) OSJNBa0084K11.3 protein                                                  |
| LjSGA_031711.1   | 55  | partial | (Q2HUX9) Esterase/lipase/thioesterase                                             |
| LjSGA_031729.0.1 | 64  | partial | (Q9LPV4) F13K23.21 protein (At1g12950)                                            |
| LjSGA_031826.1   | 115 | partial | (Q9AVQ2) Cytochrome P450                                                          |
| LjSGA_031923.1   | 85  | partial | (O23124) F19G10.6 protein                                                         |
| LjSGA_032094.1   | 42  | partial | (Q2PS27) Translationally controlled tumor protein                                 |
| LjSGA_032215.1   | 61  | partial | (Q9SUQ2) Putative Ap2 domain protein (AT4g23750/F9D16_220) (At4g23750)            |
| LjSGA_032263.1.1 | 56  | partial | (Q8LC53) Hypothetical protein                                                     |
| LjSGA_032273.1.1 | 70  | partial | (Q58A50) Embryonic flower 2                                                       |
| LjSGA_032322.1.1 | 43  | partial | (Q5JN27) Putative receptor-like protein kinase 1                                  |
| LjSGA_032337.1   | 53  | partial | (Q8VZK6) Hypothetical protein At5g49220                                           |
| LjSGA_032422.1   | 65  | partial | (Q9M6E6) Poly(A)-binding protein                                                  |
| LjSGA_032471.1.1 | 84  | partial | (Q2QD76) Cytochrome f                                                             |
| LjSGA_032505.1   | 42  | partial | (Q8RXR3) Hypothetical protein At5g52070                                           |
| LjSGA_032663.1   | 103 | partial | (Q8S9U1) Hypothetical protein B1064G04.8 (Hypothetical protein B1144D11.30)       |
| LjSGA_032692.1   | 110 | partial | (Q4DKK2) RNA-binding protein, putative                                            |
| LjSGA_032756.2   | 78  | partial | (Q9M6R3) Constitutive photomorphogenic 11                                         |
| LjSGA_032814.1   | 77  | partial | (Q8S8I4) Predicted protein                                                        |
| LjSGA_032829.1   | 80  | partial | (Q8VYX3) Sucrose transporter SUC2                                                 |
| LjSGA_032846.1   | 149 | partial | (Q9FZH6) F1O19.11 protein (Hypothetical protein At1g67050) (Hypothetical protein) |
| LjSGA_032869.1   | 46  | partial | (Q5D1M5) Class III HD-Zip protein 2                                               |
| LjSGA_032914.1   | 68  | partial | (Q9LXB8) Periaxin-like protein                                                    |
| LjSGA_033058.1.1 | 37  | partial | (Q332W3) Photosystem II protein L (Fragment)                                      |

|                  |     |         |                                                                                                                |
|------------------|-----|---------|----------------------------------------------------------------------------------------------------------------|
| LjSGA_033138.1   | 28  | partial | (Q9LPV4) F13K23.21 protein (At1g12950)                                                                         |
| LjSGA_033176.1   | 91  | partial | (Q546G6) Homeodomain-leucine zipper protein HAT22                                                              |
| LjSGA_033188.1.1 | 44  | partial | (Q52QH3) Phenylalanine ammonia-lyase                                                                           |
| LjSGA_033209.1   | 186 | partial | (Q39949) Hydroxyproline-rich protein                                                                           |
| LjSGA_033297.1.1 | 33  | partial | (O64876) Expressed protein (Hypothetical protein At2g44420)                                                    |
| LjSGA_033315.1.2 | 88  | partial | (Q9ASP8) AT3g55400/T22E16_60                                                                                   |
| LjSGA_033328.1   | 57  | partial | (Q9ZUS4) Putative kinesin heavy chain                                                                          |
| LjSGA_033438.1.2 | 45  | partial | (Q6ZKB0) Hypothetical protein OJ1124_B05.23 (Hypothetical protein OJ1111_B08.14)                               |
| LjSGA_033444.1   | 58  | partial | (Q2V2T1) Protein At4g24810                                                                                     |
| LjSGA_033642.0.1 | 60  | partial | (Q2A9R7) Hypothetical protein                                                                                  |
| LjSGA_033665.0.1 | 36  | partial | (Q8W515) SGT1a                                                                                                 |
| LjSGA_033698.1   | 65  | partial | (Q9SR79) T22K18.2 protein                                                                                      |
| LjSGA_033703.2   | 53  | partial | (Q7X9B3) 9/13 hydroperoxide lyase                                                                              |
| LjSGA_033705.1   | 41  | partial | (Q287W1) PHD finger/nucleic acid binding protein                                                               |
| LjSGA_033750.1   | 195 | partial | (Q9C977) Hypothetical protein F5I6.2 (Hypothetical protein At1g80270; F5I6.2) (Hypothetical protein At1g80270) |
| LjSGA_033809.0.1 | 76  | partial | (Q9ZT82) Putative glucan synthase component                                                                    |
| LjSGA_033950.1   | 57  | partial | (Q5NBD8) Hypothetical protein P0434D08.16                                                                      |
| LjSGA_033999.1.1 | 61  | partial | (Q6QP53) Hypothetical protein                                                                                  |
| LjSGA_034059.1.1 | 117 | partial | (O82354) Hypothetical protein At2g46150 (Hypothetical protein At2g46150/T3F17.20)                              |
| LjSGA_034093.2   | 57  | partial | (Q7XAU8) Phosphoenolpyruvate carboxykinase                                                                     |
| LjSGA_034095.1   | 55  | partial | (Q2HRG5) TIR                                                                                                   |
| LjSGA_034292.1   | 75  | partial | (Q9FQ45) Disrupted meiotic cDNA 1 protein (Fragment)                                                           |
| LjSGA_034324.1   | 56  | partial | (Q69S29) Putative equilibrative nucleoside transporter ENT8 splice variant                                     |
| LjSGA_034327.1   | 36  | partial | (Q8L821) SET domain-containing protein SET118                                                                  |

|                  |     |         |                                                                                   |
|------------------|-----|---------|-----------------------------------------------------------------------------------|
| LjSGA_034536.1   | 107 | partial | (Q6YYB8) Putative OCL5 protein                                                    |
| LjSGA_034583.3   | 54  | partial | (Q76H08) Hypothetical protein 1D11 (Fragment)                                     |
| LjSGA_034608.1   | 54  | partial | (Q8L784) Cytoplasmic aconitate hydratase (At2g05710)                              |
| LjSGA_034648.1.1 | 91  | partial | (Q5JKW7) Hypothetical protein B1147A04.42                                         |
| LjSGA_034732.1   | 88  | partial | (Q9S7Y1) Putative DNA-binding protein; 36199-34606 (Putative DNA-binding protein) |
| LjSGA_035057.2.1 | 75  | partial | (Q2V991) ArcA2 protein-like                                                       |
| LjSGA_035080.1   | 65  | partial | (Q84TM8) Polygalactorunase PG11 precursor (EC 3.2.1.15)                           |
| LjSGA_035222.1   | 72  | partial | (Q9FRR2) F22O13.25 (Hypothetical protein At1g08760)                               |
| LjSGA_035223.1   | 206 | partial | (Q8TGW9) Putative transcriptional repressor                                       |
| LjSGA_035295.1   | 63  | partial | (Q2HVI3) Peptidase, cysteine peptidase active site; Ribosomal protein L30         |
| LjSGA_035359.1.1 | 62  | partial | (Q93X16) Spermidine synthase (EC 2.5.1.16)                                        |
| LjSGA_035484.1   | 65  | partial | (Q6DBN5) At5g05230                                                                |
| LjSGA_035519.1   | 49  | partial | (Q9FMY8) Arabidopsis thaliana genomic DNA, chromosome 5, P1 clone:MJB21           |
| LjSGA_035565.2   | 72  | partial | (O04532) F20P5.14 protein                                                         |
| LjSGA_035567.1   | 382 | partial | (Q8IIX7) Hypothetical protein                                                     |
| LjSGA_035708.0.1 | 90  | partial | (Q7X7N2) OSJNBb0085F13.5 protein (OSJNBb0004G23.10 protein)                       |
| LjSGA_035786.1.1 | 35  | partial | (Q9ZPK0) Thiosulfate sulfurtransferase                                            |
| LjSGA_035814.1.1 | 112 | partial | unknown protein                                                                   |
| LjSGA_036005.1   | 148 | partial | (Q9FIX3) GblAAD30619.1                                                            |
| LjSGA_036015.1.1 | 40  | partial | (Q5ZP80) Galactokinase (EC 2.7.1.6)                                               |
| LjSGA_036016.1.1 | 36  | partial | (Q9LV40) Emb CAB41934.1                                                           |
| LjSGA_036101.1   | 89  | partial | (Q8GTM4) Chlorophyllase 1 (EC 3.1.1.14)                                           |
| LjSGA_036127.1   | 41  | partial | (Q8L7P1) SF2/ASF-like splicing modulator Srp30, putative (At1g02840)              |
| LjSGA_036171.1   | 49  | partial | (Q9XIE0) F23H11.22 protein (At1g59910)                                            |
| LjSGA_036191.2   | 45  | partial | (Q5VNP3) Peptide deformylase-like                                                 |

|                  |     |         |                                                                                                     |
|------------------|-----|---------|-----------------------------------------------------------------------------------------------------|
| LjSGA_036257.1.1 | 61  | partial | (Q947E7) Resistance gene analog NBS1 (Fragment)                                                     |
| LjSGA_036263.1   | 81  | partial | (Q9C7B2) Hypothetical protein T2E22.10                                                              |
| LjSGA_036343.1.1 | 35  | partial | (Q93X58) Beta-galactosidase (EC 3.2.1.23)                                                           |
| LjSGA_036365.1   | 55  | partial | (Q9STC7) Plastidic glucose-6-phosphate dehydrogenase (EC 1.1.1.49)                                  |
| LjSGA_036477.2   | 31  | partial | (Q9LJP4) Glucosyltransferase-like protein (Hypothetical protein At3g28180)                          |
| LjSGA_036481.2.1 | 44  | partial | (Q7EZJ3) Putative valyl-tRNA synthetase                                                             |
| LjSGA_036491.1   | 54  | partial | (Q9C9B7) Hypothetical protein F2P9.17                                                               |
| LjSGA_036526.1   | 42  | partial | (O64496) F20D22.14 protein                                                                          |
| LjSGA_036615.1   | 37  | partial | (Q9LF14) Peptidyl-tRNA hydrolase (EC 3.1.1.29) (PTH)                                                |
| LjSGA_036620.1.1 | 110 | partial | (Q9LMI5) T2D23.4 protein                                                                            |
| LjSGA_036686.1   | 80  | partial | (Q2HVI3) Peptidase, cysteine peptidase active site; Ribosomal protein L30                           |
| LjSGA_036692.1   | 118 | partial | (Q7XUL6) OSJNBa0010H02.10 protein                                                                   |
| LjSGA_036699.1   | 72  | partial | (Q8GYR2) Hypothetical protein At1g15215                                                             |
| LjSGA_036764.2.1 | 51  | partial | (O23143) Putative Ckc2                                                                              |
| LjSGA_036766.2   | 136 | partial | (Q9LEU3) Zinc finger-like protein                                                                   |
| LjSGA_036768.1   | 60  | partial | unknown protein                                                                                     |
| LjSGA_036817.1   | 114 | partial | (Q9FJJ6) Arabidopsis thaliana genomic DNA, chromosome 5, TAC clone:K19B1 (AT5g62460/K19B1_7)        |
| LjSGA_036857.1   | 62  | partial | (Q5TKF1) Hypothetical protein OSJNBa0030I14.15 (Hypothetical protein OSJNBb0086G17.6)               |
| LjSGA_036917.1   | 47  | partial | (O22778) Putative tyrosine-specific transport protein (Tryptophan/tyrosine permease family protein) |
| LjSGA_036969.1   | 133 | partial | (Q9SC41) Translocon Tic40 precursor                                                                 |
| LjSGA_037118.1   | 62  | partial | (Q9FHB6) Genomic DNA, chromosome 5, TAC clone:K24M7 (Hypothetical protein At5g52450)                |
| LjSGA_037161.1   | 65  | partial | (Q8S3B9) Putative glucosyltransferase                                                               |
| LjSGA_037166.0.1 | 47  | partial | (Q2V341) Protein At5g27640                                                                          |
| LjSGA_037238.1   | 58  | partial | (Q9M2E4) Hypothetical protein T20K12.100 (AT3g61200/T20K12_100)                                     |



|                  |     |         |                                                                                                           |
|------------------|-----|---------|-----------------------------------------------------------------------------------------------------------|
| LjSGA_037261.0.1 | 40  | partial | (Q69MC9) Putative carbonic anhydrase                                                                      |
| LjSGA_037277.1   | 44  | partial | (Q9SV43) Hypothetical protein F28P10.70                                                                   |
| LjSGA_037348.0.1 | 33  | partial | (Q94KC7) Putative potassium transporter HAK1p                                                             |
| LjSGA_037354.0.1 | 71  | partial | (Q6DUM8) Probable phytochelatin synthetase (Fragment)                                                     |
| LjSGA_037515.2   | 61  | partial | (Q4U319) Cys2/His2 zinc-finger transcription factor                                                       |
| LjSGA_037582.1   | 66  | partial | (Q8LAE1) Subtilisin-like serine protease                                                                  |
| LjSGA_037624.1.1 | 50  | partial | (Q9SB46) Rab geranylgeranyl transferase like protein (Fragment)                                           |
| LjSGA_037651.1.1 | 52  | partial | (Q9SDM5) P-glycoprotein                                                                                   |
| LjSGA_037702.1   | 78  | partial | (Q5SNM6) Hypothetical protein P0675A05.15                                                                 |
| LjSGA_037917.1   | 125 | partial | (Q9FY93) NAM-like protein (AT5g13180/T19L5_140)                                                           |
| LjSGA_037966.0.1 | 54  | partial | (Q75KW8) Putative CorA-like Mg <sup>2+</sup> transporter protein                                          |
| LjSGA_038011.1   | 175 | partial | (O65430) Glu-rich protein                                                                                 |
| LjSGA_038036.1.1 | 41  | partial | (Q8VZ78) Hypothetical protein At3g60260; F27H5_50 (Hypothetical protein) (Hypothetical protein At3g60260) |
| LjSGA_038271.1   | 286 | partial | (Q84J88) Hypothetical protein At5g27690                                                                   |
| LjSGA_038321.1   | 34  | partial | (Q6AV34) Putative Semialdehyde dehydrogenase                                                              |
| LjSGA_038384.2   | 75  | partial | (Q9XI97) F13F21.27 protein                                                                                |
| LjSGA_038403.2   | 74  | partial | (Q9LU66) Similarity to RNase H                                                                            |
| LjSGA_038431.2   | 38  | partial | (Q9SZQ6) Hypothetical protein F27B13.90 (At4g29850) (Hypothetical protein AT4g29850)                      |
| LjSGA_038511.1   | 82  | partial | (Q2QUQ9) MIF4G domain, putative                                                                           |
| LjSGA_038586.2   | 217 | partial | (Q3E9C1) Protein At5g19330                                                                                |
| LjSGA_038603.1   | 66  | partial | (Q6YUH7) Putative target of myb1 (TOM1 protein)                                                           |
| LjSGA_038609.1.1 | 41  | partial | (Q9SKN4) Hypothetical protein At2g28360                                                                   |
| LjSGA_038656.1   | 158 | partial | (Q7F1V0) Putative heme binding protein cema                                                               |
| LjSGA_038711.1   | 98  | partial | (Q8S4X3) TIR-similar-domain-containing protein TSDC                                                       |

|                  |     |         |                                                                                         |
|------------------|-----|---------|-----------------------------------------------------------------------------------------|
| LjSGA_038719.1.1 | 38  | partial | (Q8S5V1) Putative potassium/proton antiporter-like protein                              |
| LjSGA_038840.1   | 60  | partial | (Q9LZR1) Myb-like protein (MYB transcription factor)                                    |
| LjSGA_038876.1   | 58  | partial | (Q7XK24) OSJNBa0044K18.21 protein                                                       |
| LjSGA_039006.1   | 75  | partial | (O64634) Hypothetical protein At2g45540                                                 |
| LjSGA_039025.1   | 99  | partial | (Q9LHE3) Nucleoid chloroplast DNA-binding protein-like (Hypothetical protein At3g20015) |
| LjSGA_039121.1   | 62  | partial | (Q9ZVF8) Hypothetical protein At2g01460                                                 |
| LjSGA_039125.1   | 97  | partial | (Q9C5J5) Hypothetical protein At1g19010                                                 |
| LjSGA_039163.1   | 87  | partial | (Q8L7M0) Hypothetical protein At1g16570                                                 |
| LjSGA_039187.1   | 54  | partial | (Q9FJY3) Photoreceptor-interacting protein-like                                         |
| LjSGA_039253.2   | 101 | partial | (Q7XP86) OSJNBa0021F22.14 protein                                                       |
| LjSGA_039331.1   | 216 | partial | (Q84KA9) RING/C3HC4/PHD zinc finger-like protein                                        |
| LjSGA_039334.1   | 165 | partial | (Q49I32) 120 kDa pistil extensin-like protein (Fragment)                                |
| LjSGA_039344.2.1 | 88  | partial | (Q3E6Q7) Protein At2g44980                                                              |
| LjSGA_039363.0.1 | 46  | partial | (Q9TMS3) ATP synthase beta subunit (Fragment)                                           |
| LjSGA_039409.0.1 | 50  | partial | (Q94A05) Hypothetical protein At4g32120                                                 |
| LjSGA_039413.1   | 28  | partial | (Q940I2) Hypothetical protein MED24.18                                                  |
| LjSGA_039467.1   | 53  | partial | (Q94CF8) Branched-chain amino acid aminotransferase                                     |
| LjSGA_039661.1.1 | 58  | partial | (Q8LC13) Remorin                                                                        |
| LjSGA_039743.1   | 94  | partial | (Q2A9H0) GATA zinc finger containing protein                                            |
| LjSGA_039786.1   | 39  | partial | (P92952) HAPp48,5 protein (Fragment)                                                    |
| LjSGA_039790.2   | 134 | partial | unknown protein                                                                         |
| LjSGA_039795.1   | 89  | partial | (Q25CI0) Hypothetical protein osysl6                                                    |
| LjSGA_039891.0.1 | 68  | partial | (Q6UD72) LysM domain-containing receptor-like kinase 4 (Fragment)                       |
| LjSGA_040014.2   | 58  | partial | (Q5BPG9) Hypothetical protein                                                           |
| LjSGA_040047.1.1 | 49  | partial | (Q6DNI8) Tau class glutathione S-transferase                                            |

|                  |     |         |                                                                                                                                          |
|------------------|-----|---------|------------------------------------------------------------------------------------------------------------------------------------------|
| LjSGA_040105.1   | 64  | partial | (Q7SY63) Cg9836-prov protein                                                                                                             |
| LjSGA_040109.1   | 47  | partial | (Q6Z2H7) Putative calcium binding protein                                                                                                |
| LjSGA_040160.1   | 108 | partial | (Q9LYA8) Rac-GTP binding protein-like                                                                                                    |
| LjSGA_040270.2   | 133 | partial | (Q9FS17) OsIre1p                                                                                                                         |
| LjSGA_040287.1   | 59  | partial | (Q2R135) Expressed protein                                                                                                               |
| LjSGA_040320.1   | 148 | partial | (Q6F2S9) Hypothetical protein OSJNBa0027N19.13                                                                                           |
| LjSGA_040347.1   | 100 | partial | (Q9FL03) SCARECROW gene regulator                                                                                                        |
| LjSGA_040398.1   | 155 | partial | (Q9LLM3) MTD1                                                                                                                            |
| LjSGA_040424.2   | 59  | partial | (Q84TM8) Polygalactorunase PG11 precursor (EC 3.2.1.15)                                                                                  |
| LjSGA_040572.1   | 51  | partial | (Q3EDC4) Protein At1g14820                                                                                                               |
| LjSGA_040684.1   | 76  | partial | (Q9FFJ3) Arabidopsis thaliana genomic DNA, chromosome 5, P1 clone:MJJ3 (At5g05850) (Plant intracellular Ras-group-related LRR protein 1) |
| LjSGA_040884.1   | 153 | partial | (Q5XWN7) Hypothetical protein                                                                                                            |
| LjSGA_040891.1   | 58  | partial | (Q2HU24) Hypothetical protein                                                                                                            |
| LjSGA_040947.1   | 111 | partial | (Q9XEE6) Hypothetical Cys-3-His zinc finger protein (Putative CCCH-type zinc finger protein)                                             |
| LjSGA_040967.1   | 38  | partial | (Q9FYD1) Hypothetical protein F22J12_30 (Hypothetical protein At3g43590)                                                                 |
| LjSGA_040993.1.2 | 37  | partial | (Q332W3) Photosystem II protein L (Fragment)                                                                                             |
| LjSGA_041202.1   | 57  | partial | (Q5DQ95) 4-amino-4-deoxychorismate lyase                                                                                                 |
| LjSGA_041322.1.1 | 60  | partial | unknown protein                                                                                                                          |
| LjSGA_041396.1   | 179 | partial | (O18161) Hypothetical protein sig-7                                                                                                      |
| LjSGA_041397.1   | 58  | partial | (Q9FHX0) Similarity to glutathione-S-transferase/glutaredoxin (Hypothetical protein At5g42150) (Hypothetical protein)                    |
| LjSGA_041397.2   | 44  | partial | (Q705X3) Rho GDP dissociation inhibitor 2 (RHO protein GDP dissociation inhibitor)                                                       |
| LjSGA_041421.1.1 | 40  | partial | (Q3HVP5) Hypothetical protein                                                                                                            |
| LjSGA_041467.1.1 | 46  | partial | (O65152) Putative cinnamyl alcohol dehydrogenase                                                                                         |

|                  |     |         |                                                                                                           |
|------------------|-----|---------|-----------------------------------------------------------------------------------------------------------|
| LjSGA_041524.1   | 82  | partial | (Q9FPS7) Ubiquitin-specific protease 20                                                                   |
| LjSGA_041724.1   | 35  | partial | (Q2QX12) Growth regulator, putative                                                                       |
| LjSGA_041869.1   | 55  | partial | (Q84VS2) Potyviral helper component protease-interacting protein 2                                        |
| LjSGA_041906.1   | 43  | partial | (Q40213) RAB7C                                                                                            |
| LjSGA_041960.1   | 67  | partial | (Q5Y381) Aldo/keto reductase                                                                              |
| LjSGA_042040.0.1 | 75  | partial | (Q6ZD98) Putative vesicle-associated membrane protein-associated protein                                  |
| LjSGA_042173.1.1 | 46  | partial | (Q506M2) Cinnamyl alcohol dehydrogenase                                                                   |
| LjSGA_042176.1   | 61  | partial | (Q9LIM5) Arabidopsis thaliana genomic DNA, chromosome 3, BAC clone:F4B12 (Hypothetical protein At3g15095) |
| LjSGA_042198.1   | 69  | partial | (Q8W4B1) RNA-binding protein-like (At5g53060)                                                             |
| LjSGA_042433.1.1 | 66  | partial | (Q93X58) Beta-galactosidase (EC 3.2.1.23)                                                                 |
| LjSGA_042483.1.1 | 76  | partial | (Q40868) Heat shock-like protein                                                                          |
| LjSGA_042495.1   | 91  | partial | (Q38B00) Universal minicircle sequence binding protein (UMSBP), putative                                  |
| LjSGA_042513.1   | 43  | partial | (Q9SRP6) T21P5.16 protein (Hypothetical protein At3g03420)                                                |
| LjSGA_042537.1   | 107 | partial | (Q3C251) Glutamate N-acetyltransferase                                                                    |
| LjSGA_042540.1.1 | 64  | partial | (Q6YWF9) Nucleoporin-like protein                                                                         |
| LjSGA_042581.1.1 | 39  | partial | (Q9LPZ4) T23J18.7 (Hypothetical protein At1g11400)                                                        |
| LjSGA_042622.1   | 53  | partial | (Q8GZ75) Hypothetical protein At2g03780/F19B11.23 (At2g03780)                                             |
| LjSGA_042627.2   | 42  | partial | (Q84VQ7) Alpha-galactosidase                                                                              |
| LjSGA_042650.1.1 | 61  | partial | unknown protein                                                                                           |
| LjSGA_042668.1   | 25  | partial | (Q2XSM3) NADH dehydrogenase subunit 6                                                                     |
| LjSGA_042720.1   | 71  | partial | (Q2HZ34) Plasma membrane-associated AAA-ATPase                                                            |
| LjSGA_042754.2   | 147 | partial | (Q9LW36) Arabidopsis thaliana genomic DNA, chromosome 3, P1 clone: MDJ14                                  |
| LjSGA_042766.1   | 103 | partial | (Q5XM22) Resistance-like protein HAAS-2 (Fragment)                                                        |
| LjSGA_042770.1   | 92  | partial | (Q93XA7) NAC domain protein NAC1                                                                          |

|                  |     |         |                                                                         |
|------------------|-----|---------|-------------------------------------------------------------------------|
| LjSGA_042774.1   | 128 | partial | (Q2HS00) TIR                                                            |
| LjSGA_042791.1   | 46  | partial | (Q2V3X8) Protein At3g07110                                              |
| LjSGA_042870.1.1 | 38  | partial | (Q67Z55) Hypothetical protein At1g19710                                 |
| LjSGA_042984.0.1 | 39  | partial | (Q8LER0) Hypothetical protein                                           |
| LjSGA_043018.2   | 71  | partial | (Q67UL5) Putative fructokinase                                          |
| LjSGA_043053.1.1 | 40  | partial | (Q9LV06) Similarity to zinc finger protein                              |
| LjSGA_043098.1.1 | 47  | partial | (Q3HRP5) Calcineurin B-like protein 2                                   |
| LjSGA_043414.0.1 | 34  | partial | (Q8LAC4) Hypothetical protein (At1g05620) (Expressed protein)           |
| LjSGA_043451.1   | 145 | partial | (Q67YE8) Protease HhoA like                                             |
| LjSGA_043497.1.1 | 46  | partial | (Q9M0K5) Hypothetical protein AT4g25550 (Fragment)                      |
| LjSGA_043629.1   | 107 | partial | (Q8LHG0) Membrane protein-like                                          |
| LjSGA_043731.1   | 118 | partial | (Q6ZB67) Hypothetical protein OJ1119_B10.8                              |
| LjSGA_043904.2   | 37  | partial | (Q3E9B0) Protein At5g19950                                              |
| LjSGA_044148.1   | 60  | partial | (Q9FG25) Arabidopsis thaliana genomic DNA, chromosome 5, P1 clone:MPH15 |
| LjSGA_044234.1.1 | 39  | partial | (Q3ECD7) Protein At1g72550                                              |
| LjSGA_044252.0.1 | 58  | partial | (Q2HU54) SAM (And some other nucleotide) binding motif; WW/Rsp5/WWP     |
| LjSGA_044281.1   | 67  | partial | (Q7XIM1) Hypothetical protein OJ1714_H10.131                            |
| LjSGA_044329.1   | 77  | partial | unknown protein                                                         |
| LjSGA_044437.1.1 | 37  | partial | (Q332W3) Photosystem II protein L (Fragment)                            |
| LjSGA_044439.1   | 49  | partial | (Q6K701) Putative fibrillarin                                           |
| LjSGA_044448.1   | 43  | partial | (Q2TUV6) Glutathione S-transferase 2                                    |
| LjSGA_044484.1   | 58  | partial | (Q2HV57) Hypothetical protein                                           |
| LjSGA_044551.1.1 | 36  | partial | (Q2QMY2) Protein kinase-like protein                                    |
| LjSGA_044649.1   | 160 | partial | (Q9M1L9) Hypothetical protein F18P9_20 (Hypothetical protein At3g42860) |
| LjSGA_044664.1   | 27  | partial | (O23164) Cold acclimation protein homolog                               |

|                  |     |         |                                                                                     |
|------------------|-----|---------|-------------------------------------------------------------------------------------|
| LjSGA_044670.1.1 | 100 | partial | (Q9LXM2) Putative CCR4-associated factor 1                                          |
| LjSGA_044868.0.1 | 160 | partial | (Q6Z553) Hypothetical protein OSJNBa0007M04.36                                      |
| LjSGA_044878.1.1 | 38  | partial | (Q9ZRV6) Hypothetical protein                                                       |
| LjSGA_044963.2   | 46  | partial | (Q2HUG6) Peptidase C14, caspase catalytic subunit p20                               |
| LjSGA_044978.1   | 52  | partial | (Q93X02) Putative ammonium transporter AMT2                                         |
| LjSGA_045060.1   | 79  | partial | (Q9ZSR1) Cytoplasmic glucose-6-phosphate 1-dehydrogenase (EC 1.1.1.49)              |
| LjSGA_045123.1   | 43  | partial | unknown protein                                                                     |
| LjSGA_045180.1   | 64  | partial | (Q9LXQ2) Hypothetical protein F26G5_50 (At3g44100) (Hypothetical protein)           |
| LjSGA_045300.1   | 60  | partial | (Q67YE7) Protein-tyrosine-phosphatase-like protein                                  |
| LjSGA_045459.1   | 49  | partial | unknown protein                                                                     |
| LjSGA_045485.2   | 143 | partial | (Q7S753) Hypothetical protein                                                       |
| LjSGA_045517.1   | 40  | partial | (Q8S9M8) P53 binding protein (Fragment)                                             |
| LjSGA_045564.1   | 57  | partial | (Q9LZW2) Hypothetical protein T20L15_110                                            |
| LjSGA_045623.1   | 122 | partial | (Q4Q1R0) Universal minicircle sequence binding protein (UMSBP), putative            |
| LjSGA_045720.1   | 121 | partial | (Q9FY93) NAM-like protein (AT5g13180/T19L5_140)                                     |
| LjSGA_045779.1.1 | 104 | partial | (Q9ZWS2) Flavonoid 3-O-galactosyl transferase                                       |
| LjSGA_046043.1   | 54  | partial | (Q5TKP5) Hypothetical protein OJ1362_G11.13                                         |
| LjSGA_046249.1   | 141 | partial | (Q9LZS6) Cucumisin-like protein                                                     |
| LjSGA_046560.1   | 47  | partial | (Q9SFE9) T26F17.9 (GONST5 Golgi Nucleotide sugar transporter)                       |
| LjSGA_046612.0.1 | 39  | partial | (Q332T6) Ribosomal protein S19                                                      |
| LjSGA_046631.0.1 | 44  | partial | (Q8LPM5) Starch phosphorylase type L (Fragment)                                     |
| LjSGA_046842.1.1 | 35  | partial | (Q41668) Guanine nucleotide regulatory protein                                      |
| LjSGA_046895.1   | 51  | partial | (Q94B52) Hypothetical protein T10C21.40 (Hypothetical protein At4g30690; T10C21.40) |
| LjSGA_046936.1   | 38  | partial | (Q67YN9) Imidazoleglycerolphosphate dehydratase                                     |
| LjSGA_047018.1.1 | 40  | partial | (Q9C9R6) Putative RNA-binding protein; 42664-44784                                  |

|                  |     |         |                                                                                                          |
|------------------|-----|---------|----------------------------------------------------------------------------------------------------------|
| LjSGA_047166.1   | 42  | partial | (Q5I4I4) Calcium-dependent/calmodulin-independent protein kinase isoform 3 (Fragment)                    |
| LjSGA_047292.1.1 | 42  | partial | (Q9FI35) DnaJ protein-like                                                                               |
| LjSGA_047343.1.1 | 47  | partial | (Q6W6R6) Putative serine carboxypeptidase                                                                |
| LjSGA_047414.1   | 44  | partial | (Q9FHY3) Arabidopsis thaliana genomic DNA, chromosome 5, P1 clone:MJC20 (Hypothetical protein At5g42000) |
| LjSGA_047461.1   | 35  | partial | (Q9LN44) F18O14.26                                                                                       |
| LjSGA_047625.2   | 102 | partial | (Q9FZH6) F1O19.11 protein (Hypothetical protein At1g67050) (Hypothetical protein)                        |
| LjSGA_047660.1   | 50  | partial | (Q60EZ7) Hypothetical protein OJ1111_A10.16                                                              |
| LjSGA_047894.1.1 | 73  | partial | (Q2VA65) Glucosyltransferase                                                                             |
| LjSGA_047916.1   | 52  | partial | (Q709Q5) Cytokinin oxidase 2                                                                             |
| LjSGA_047985.2   | 52  | partial | (Q94G04) Diphosphonucleotide phosphatase 1                                                               |
| LjSGA_047986.1   | 147 | partial | unknown protein                                                                                          |
| LjSGA_048078.1   | 71  | partial | (Q6X0N8) Putative spermine/spermidine synthase                                                           |
| LjSGA_048191.0.1 | 34  | partial | (Q2V4H1) Protein At1g53580                                                                               |
| LjSGA_048269.1   | 74  | partial | (Q68UW2) Expansin                                                                                        |
| LjSGA_048344.2   | 53  | partial | (O04512) F21M12.30 protein                                                                               |
| LjSGA_048348.1   | 118 | partial | (Q7S753) Hypothetical protein                                                                            |
| LjSGA_048360.1.1 | 32  | partial | (Q9FR28) Transcription factor WRKY5                                                                      |
| LjSGA_048385.1   | 127 | partial | (Q8L7M7) Hypothetical protein At1g17820                                                                  |
| LjSGA_048388.1   | 33  | partial | (Q9SL05) Expressed protein (At2g05620/T20G20.3)                                                          |
| LjSGA_048441.1.1 | 55  | partial | (Q8LC13) Remorin                                                                                         |
| LjSGA_048461.1   | 183 | partial | (Q8H1N0) Hypothetical protein At2g33400/F4P9.17                                                          |
| LjSGA_048503.1.1 | 53  | partial | (Q9SJB4) Putative GDSL-motif lipase/hydrolase                                                            |
| LjSGA_048592.1   | 84  | partial | (Q2V3C9) Protein At4g32180                                                                               |
| LjSGA_048666.1   | 128 | partial | (O48579) Mi-2 autoantigen-like protein (Helicase-like protein)                                           |

|                  |     |         |                                                                                             |
|------------------|-----|---------|---------------------------------------------------------------------------------------------|
| LjSGA_048701.1   | 36  | partial | (Q8LNH8) Glycine-rich protein, putative                                                     |
| LjSGA_048716.1.1 | 82  | partial | (Q9ASU6) At1g42440/F7F22_7 (Hypothetical protein At1g42440)                                 |
| LjSGA_048818.1   | 55  | partial | (Q8LE46) Zinc finger protein-like                                                           |
| LjSGA_049165.1.1 | 45  | partial | (Q8LMQ4) Hypothetical protein OSJNBa0011L14.7                                               |
| LjSGA_049190.1   | 51  | partial | (Q9LP92) T32E20.28 (Hypothetical protein At1g36990)                                         |
| LjSGA_049296.1.1 | 28  | partial | (Q93W00) Putative CRK1 protein (Putative cyclin dependent kinase C)                         |
| LjSGA_049313.1   | 33  | partial | (Q3HRY6) Hypothetical protein                                                               |
| LjSGA_049329.1   | 41  | partial | (Q3EDE9) Protein At1g10820                                                                  |
| LjSGA_049433.0.1 | 47  | partial | (Q5XET5) At2g39740                                                                          |
| LjSGA_049510.2   | 190 | partial | (Q8RWG3) Hypothetical protein At3g56140                                                     |
| LjSGA_049529.1   | 80  | partial | (Q42433) S3 self-incompatibility protein precursor                                          |
| LjSGA_049549.2.1 | 210 | partial | (Q5N967) Putative terbinafine resistance locus protein                                      |
| LjSGA_049567.1   | 88  | partial | (Q6ATK0) Hypothetical protein OSJNBa0015G13.14                                              |
| LjSGA_049635.1.1 | 42  | partial | (Q8LCU5) Transmembrane transport protein-like protein                                       |
| LjSGA_049711.1   | 67  | partial | (Q8SB36) Putative senescence-associated protein                                             |
| LjSGA_049823.1   | 89  | partial | (Q6A1K9) Anaerobic basic leucine zipper protein                                             |
| LjSGA_049856.1   | 65  | partial | (Q6Z553) Hypothetical protein OSJNBa0007M04.36                                              |
| LjSGA_049858.1   | 54  | partial | (Q5E919) At3g27300                                                                          |
| LjSGA_050066.2   | 56  | partial | (Q9M995) F27J15.28 (Putative glycosyl hydrolase family 9 (Endo-1,4-beta-glucanase) protein) |
| LjSGA_050101.1   | 59  | partial | (Q2HUL1) Initiation factor eIF-4 gamma, middle                                              |
| LjSGA_050199.0.1 | 48  | partial | (Q2VEJ1) ATP synthase CF1 alpha chain                                                       |
| LjSGA_050239.1   | 57  | partial | (Q2A9Q5) Acyl carrier protein, putative                                                     |
| LjSGA_050254.1.1 | 76  | partial | (Q3EBQ5) Protein At2g32090                                                                  |
| LjSGA_050288.1   | 53  | partial | (Q67TV0) GPI inositol-deacylase PGAP1-like protein                                          |
| LjSGA_050595.1   | 45  | partial | (Q69MX4) Pentatricopeptide (PPR) repeat-containing protein-like                             |



|                  |     |         |                                                                                     |
|------------------|-----|---------|-------------------------------------------------------------------------------------|
| LjSGA_050671.1   | 49  | partial | (Q8L947) Putative DNA-directed RNA polymerase 23kD subunit                          |
| LjSGA_050730.0.1 | 38  | partial | (Q7G152) Hypothetical protein Sb07 (Fragment)                                       |
| LjSGA_050778.1   | 112 | partial | unknown protein                                                                     |
| LjSGA_050879.1   | 71  | partial | (Q9SMX5) GCN4-complementing protein (GCP1)                                          |
| LjSGA_050890.1.1 | 86  | partial | (Q9FNL1) Phosphate/triose-phosphate translocator                                    |
| LjSGA_050999.1   | 51  | partial | (Q8LGT9) Phosphoglycerate mutase-like protein                                       |
| LjSGA_051098.0.1 | 68  | partial | (Q9FJ81) Arabidopsis thaliana genomic DNA, chromosome 5, P1 clone:MSG15             |
| LjSGA_051100.2   | 69  | partial | (Q9LYD6) Hypothetical protein F15N18_150                                            |
| LjSGA_051142.1   | 65  | partial | (Q8L9F9) Hypothetical protein                                                       |
| LjSGA_051338.1   | 67  | partial | (Q9C7J0) Hypothetical protein T9I1.1                                                |
| LjSGA_051364.1   | 36  | partial | (Q9ZRU5) Protein phosphatase (Fragment)                                             |
| LjSGA_051417.1   | 68  | partial | (Q84K84) Hypothetical protein At5g63000                                             |
| LjSGA_051569.1   | 78  | partial | (Q6YU88) Putative kinesin                                                           |
| LjSGA_051593.1.1 | 65  | partial | (Q6I681) Cytochrome b561                                                            |
| LjSGA_051710.1   | 43  | partial | (Q9SXU4) Plastoquinol-plastocyanin reductase (Fragment)                             |
| LjSGA_051773.3   | 93  | partial | (Q6ZGU0) Putative NAC domain protein NAM                                            |
| LjSGA_051909.1   | 87  | partial | (Q9T0I3) Hypothetical protein AT4g38750                                             |
| LjSGA_051927.2   | 61  | partial | (Q8L601) Hypothetical protein At2g22400                                             |
| LjSGA_052340.1   | 68  | partial | (Q8LSP1) Putative clathrin coat assembly protein                                    |
| LjSGA_052385.1   | 254 | partial | (Q752C9) AFR646Wp                                                                   |
| LjSGA_052544.2   | 44  | partial | (Q94L30) Receptor-like protein kinase (Fragment)                                    |
| LjSGA_052580.1.1 | 68  | partial | (Q9SIW6) Expressed protein (Hypothetical protein At2g16350; F16F14.15) (At2g16350)  |
| LjSGA_052743.1   | 45  | partial | (Q9ZQ41) Hypothetical protein At2g22730                                             |
| LjSGA_052885.1   | 101 | partial | (Q9M4A3) Putative cytochrome B 561 (Fragment)                                       |
| LjSGA_052897.1   | 91  | partial | (Q9C548) Myb-family transcription factor, putative (Hypothetical protein T18I24.13) |

|                  |     |         |                                                                                                             |
|------------------|-----|---------|-------------------------------------------------------------------------------------------------------------|
| LjSGA_052899.1   | 59  | partial | unknown protein                                                                                             |
| LjSGA_052926.1.1 | 129 | partial | (Q9LS96) Arabidopsis thaliana genomic DNA, chromosome 3, P1 clone: MVE11 (At3g18800) (Hypothetical protein) |
| LjSGA_052934.2   | 48  | partial | (Q9LP15) F9C16.3                                                                                            |
| LjSGA_052948.1   | 86  | partial | (Q2V3S3) Protein At3g26744                                                                                  |
| LjSGA_053000.1   | 59  | partial | (Q7XKR2) OSJNBa0053B21.9 protein                                                                            |
| LjSGA_053010.1   | 200 | partial | (Q8S8Z9) Syringolide-induced protein 1-3-1B                                                                 |
| LjSGA_053114.0.1 | 75  | partial | (Q6J8W9) Cellulose synthase                                                                                 |
| LjSGA_053158.1.1 | 52  | partial | (O22649) Alcohol dehydrogenase (Fragment)                                                                   |
| LjSGA_053320.1   | 135 | partial | (O23020) T1G11.10 protein                                                                                   |
| LjSGA_053536.1   | 35  | partial | (Q56WW3) Putative mitochondrial translation elongation factor G                                             |
| LjSGA_053748.1   | 52  | partial | (Q8S8F8) Expressed protein                                                                                  |
| LjSGA_053826.1   | 159 | partial | (Q9D GK5) Splicing factor arginine/serine rich 2 (Fragment)                                                 |
| LjSGA_054125.2   | 88  | partial | (Q6K2Y3) Putative guanylate binding protein                                                                 |
| LjSGA_054188.1.1 | 67  | partial | (Q9LFR7) Hypothetical protein F1N13_220 (Hypothetical protein At5g16080)                                    |
| LjSGA_054482.1   | 128 | partial | (Q9C864) Chloroplast nucleoid DNA binding protein, putative (Aspartyl protease family protein)              |
| LjSGA_054507.1   | 45  | partial | (Q8GSD7) mRNA capping enzyme-like protein                                                                   |
| LjSGA_054553.2.1 | 45  | partial | (Q6W2J3) VDAC1.3                                                                                            |
| LjSGA_054565.1   | 47  | partial | (Q570G5) Hypothetical protein At1g01540                                                                     |
| LjSGA_054664.1   | 118 | partial | (Q94B55) Putative RING zinc finger ankyrin protein (At2g28840)                                              |
| LjSGA_054734.1   | 71  | partial | (Q3E6Q7) Protein At2g44980                                                                                  |
| LjSGA_054886.2   | 109 | partial | (Q9FF48) GblAAB97123.1                                                                                      |
| LjSGA_054957.1   | 205 | partial | (Q42673) Papaya proteinase omega (EC 3.4.22.6)                                                              |
| LjSGA_055038.1   | 67  | partial | (Q8VXZ5) Hypothetical protein At2g35610                                                                     |
| LjSGA_055079.1   | 159 | partial | (Q5N7S6) Receptor serine/threonine kinase PR5K-like                                                         |

|                  |     |         |                                                                                                      |
|------------------|-----|---------|------------------------------------------------------------------------------------------------------|
| LjSGA_055157.1   | 155 | partial | (Q9ZPE4) T3H13.1 protein (At4g08980) (F-box protein family, AtFBW2) (Hypothetical protein AT4g08980) |
| LjSGA_055214.1   | 48  | partial | (Q9CAR6) Putative alpha-amylase; 60344-64829                                                         |
| LjSGA_055413.0.1 | 53  | partial | (O23455) Hypothetical protein dl4070w (Hypothetical protein AT4g16060)                               |
| LjSGA_055806.1   | 62  | partial | unknown protein                                                                                      |
| LjSGA_055829.1   | 46  | partial | (Q84R59) Hypothetical protein OSJNBb0113I20.17                                                       |
| LjSGA_055979.1   | 84  | partial | (Q8VZI8) At1g07510/F22G5_9                                                                           |
| LjSGA_056024.1   | 42  | partial | (Q3E9B7) Protein At5g19420                                                                           |
| LjSGA_056101.2   | 58  | partial | (Q84U30) Photosystem I-N subunit                                                                     |
| LjSGA_056125.1.1 | 80  | partial | (Q6JJ55) Putative PHD zinc finger protein                                                            |
| LjSGA_056127.1.1 | 147 | partial | (Q9SB40) Hypothetical protein F24A6.70 (Hypothetical protein AT4g25230)                              |
| LjSGA_056278.1   | 53  | partial | (Q2PEQ3) Hypothetical protein                                                                        |
| LjSGA_056374.1   | 97  | partial | (Q9ZQI2) Hypothetical protein At2g27370                                                              |
| LjSGA_056411.1   | 78  | partial | (Q9LMD9) F14D16.3                                                                                    |
| LjSGA_056427.1   | 32  | partial | (Q8LA67) Hypothetical protein                                                                        |
| LjSGA_056473.2   | 57  | partial | (Q5VSC2) MutT/nudix protein-like                                                                     |
| LjSGA_056482.2   | 132 | partial | (Q2WM17) Chitinase II                                                                                |
| LjSGA_056536.1   | 40  | partial | (Q9LL56) Receptor-like kinase                                                                        |
| LjSGA_056543.1   | 35  | partial | (Q4U3E9) Putative L24 ribosomal protein                                                              |
| LjSGA_056716.1   | 68  | partial | (Q9LXB8) Periaxin-like protein                                                                       |
| LjSGA_056743.1   | 61  | partial | (Q94B71) Hypothetical protein F10B6.14 (Hypothetical protein At1g14740)                              |
| LjSGA_056803.1   | 173 | partial | (Q84Q47) Hypothetical protein P0456B03.121-1                                                         |
| LjSGA_056888.1   | 63  | partial | (Q657P0) Putative SecA                                                                               |
| LjSGA_057054.1   | 75  | partial | (Q9FQ45) Disrupted meiotic cDNA 1 protein (Fragment)                                                 |
| LjSGA_057169.1   | 48  | partial | (Q2HUE7) PSP, proline-rich                                                                           |

|                  |     |         |                                                                                                                   |
|------------------|-----|---------|-------------------------------------------------------------------------------------------------------------------|
| LjSGA_057486.1   | 55  | partial | (Q949V7) Hypothetical protein At3g59300                                                                           |
| LjSGA_057487.1   | 62  | partial | (Q6ASR0) Putative DegP2 protease                                                                                  |
| LjSGA_057634.1   | 35  | partial | (Q653N8) ThiF family protein-like                                                                                 |
| LjSGA_057635.1   | 52  | partial | (Q940R2) At1g04130/F20D22_10                                                                                      |
| LjSGA_057708.1   | 28  | partial | (Q9FX34) Hypothetical protein T9L24.40 (Hypothetical protein At1g73390)                                           |
| LjSGA_057886.2   | 90  | partial | (Q852A6) Putative Hsp70 binding protein                                                                           |
| LjSGA_058119.1   | 66  | partial | (Q69S79) Putative ABC transporter                                                                                 |
| LjSGA_058176.1.1 | 64  | partial | (Q9LDD4) Hypothetical protein AT4g11400                                                                           |
| LjSGA_058250.1   | 62  | partial | (Q8H1T4) Putative cleavage and polyadenylation specificity factor 160 kDa subunit                                 |
| LjSGA_058256.1   | 39  | partial | (O49607) Subtilisin proteinase-like (Putative subtilisin serine protease) (Putative subtilisin serine proteinase) |
| LjSGA_058352.1   | 79  | partial | (Q8LI34) Putative histone acetyltransferase                                                                       |
| LjSGA_058404.1   | 59  | partial | (Q6Z9Y1) Putative high affinity sulfate transporter                                                               |
| LjSGA_058414.1   | 46  | partial | (Q7XI54) Putative transmembrane protein                                                                           |
| LjSGA_058496.1   | 153 | partial | (Q2QYK7) RING zinc finger protein, putative                                                                       |
| LjSGA_058518.1.1 | 37  | partial | (Q8L4N2) Cell-wall invertase                                                                                      |
| LjSGA_058594.1   | 91  | partial | (Q5ZC52) Hypothetical protein P0443D08.44                                                                         |
| LjSGA_058664.1   | 71  | partial | (Q9SY29) T17H7.15 (Hypothetical protein At1g30840) (Hypothetical protein)                                         |
| LjSGA_058746.1   | 48  | partial | (Q2V410) Protein At2g41700                                                                                        |
| LjSGA_058801.1   | 280 | partial | (Q94FL7) Putative transcription factor MYB120                                                                     |
| LjSGA_058803.1   | 71  | partial | (Q5MJV5) Avr9/Cf-9 rapidly elicited protein 256 (Fragment)                                                        |
| LjSGA_058827.1   | 36  | partial | (O22505) Cytosolic glutamine synthetase (EC 6.3.1.2) (Fragment)                                                   |
| LjSGA_058960.1   | 59  | partial | (Q7EY41) Hypothetical protein OSJNBa0075N02.126                                                                   |
| LjSGA_059015.2   | 146 | partial | (Q3EDF8) Protein At1g09900                                                                                        |
| LjSGA_059053.1   | 211 | partial | (Q4Q1R0) Universal minicircle sequence binding protein (UMSBP), putative                                          |

|                  |     |         |                                                                               |
|------------------|-----|---------|-------------------------------------------------------------------------------|
| LjSGA_059083.1   | 55  | partial | (Q67U28) Hypothetical protein B1047G05.17 (Hypothetical protein P0677B10.32)  |
| LjSGA_059088.1   | 53  | partial | (Q9CA89) Hypothetical protein F19K16.18                                       |
| LjSGA_059232.1   | 181 | partial | (Q949J9) Hypothetical protein                                                 |
| LjSGA_059320.1   | 53  | partial | (Q41325) Cationic peroxidase                                                  |
| LjSGA_059324.0.1 | 35  | partial | (Q8H6J1) Putative cytidine deaminase                                          |
| LjSGA_059379.1   | 36  | partial | (Q3C1M8) Ribosomal protein S7                                                 |
| LjSGA_059387.1   | 52  | partial | (Q9FKW8) Senescence-associated protein sen1-like protein (AT5g66170/K2A18_25) |
| LjSGA_059431.1.2 | 37  | partial | (Q332W3) Photosystem II protein L (Fragment)                                  |
| LjSGA_059671.1.1 | 132 | partial | (Q7XV50) OSJNBa0086B14.5 protein                                              |
| LjSGA_059862.1   | 192 | partial | (Q9LSB0) EmbiCAB70981.1                                                       |
| LjSGA_059909.1   | 61  | partial | (Q9FF90) 60S ribosomal protein L13 (AT5g23900/MRO11_6)                        |
| LjSGA_059945.1.1 | 47  | partial | (Q2PET1) Putative PSII-P protein (Fragment)                                   |
| LjSGA_059954.2   | 49  | partial | (Q4U0E3) Plasma membrane intrinsic protein (Fragment)                         |
| LjSGA_060025.1   | 56  | partial | (Q9LD28) Histone H2A                                                          |
| LjSGA_060031.1.1 | 41  | partial | (Q70Z23) Protein kinase 2 beta chain                                          |
| LjSGA_060228.1   | 38  | partial | (Q2HIW2) At4g14965                                                            |
| LjSGA_060249.1   | 43  | partial | (Q6ENK8) Splicing factor 4-like protein                                       |
| LjSGA_060318.0.1 | 42  | partial | (Q2QYQ3) Hypothetical protein                                                 |
| LjSGA_060444.2   | 205 | partial | (Q65XI3) Hypothetical protein OSJNBb0035J08.10                                |
| LjSGA_060504.1   | 45  | partial | (Q9C5N4) Hypothetical protein At1g55680                                       |
| LjSGA_060511.1   | 40  | partial | (Q56ZY3) Putative pattern formation protein EMB30                             |
| LjSGA_060581.1   | 84  | partial | (O80910) Hypothetical protein At2g38410                                       |
| LjSGA_060663.1   | 203 | partial | (Q27341) Trichosia pubescens puff C4B protein                                 |
| LjSGA_060686.1   | 160 | partial | (Q9FFL9) Arabidopsis thaliana genomic DNA, chromosome 5, P1 clone:MIK22       |
| LjSGA_060694.1   | 206 | partial | (Q2HVE5) Cyclin-like F-box                                                    |

|                  |     |         |                                                                         |
|------------------|-----|---------|-------------------------------------------------------------------------|
| LjSGA_060721.1.1 | 55  | partial | (Q7EZT2) Hypothetical protein P0625E02.128                              |
| LjSGA_060749.1   | 55  | partial | (Q8LKN3) SUMO activating enzyme 1b                                      |
| LjSGA_060803.0.1 | 46  | partial | (Q94AI6) Hypothetical protein At1g71820                                 |
| LjSGA_060941.1   | 72  | partial | (Q9SYL6) Putative gamma-glutamyl hydrolase                              |
| LjSGA_060952.1   | 46  | partial | (Q2HXX3) Carotenoid isomerase                                           |
| LjSGA_060988.1.1 | 65  | partial | (Q6R311) Alcohol acyl transferase                                       |
| LjSGA_061049.1   | 34  | partial | (Q29PX1) At5g08565                                                      |
| LjSGA_061121.1   | 113 | partial | (Q9FS17) OsIre1p                                                        |
| LjSGA_061247.0.1 | 34  | partial | (Q94BQ9) Hypothetical protein At1g30890 (Hypothetical protein)          |
| LjSGA_061554.1   | 79  | partial | (Q6K7P0) Putative DNA-binding protein PD3, chloroplast                  |
| LjSGA_061608.2   | 64  | partial | (Q9C9K5) Hypothetical protein F14G6.12 (Hypothetical protein At1g76520) |
| LjSGA_061650.1   | 75  | partial | (Q5N9U6) Hypothetical protein P0408C03.31-1                             |
| LjSGA_061864.1   | 48  | partial | (Q9SXG0) F1F0-ATPase inhibitor protein                                  |
| LjSGA_061940.1   | 49  | partial | (Q8RXT0) Putative phosphoesterase                                       |
| LjSGA_061946.1   | 49  | partial | (O82762) Hypothetical protein At2g25970 (F17H15.1/F17H15.1)             |
| LjSGA_062028.1   | 115 | partial | (Q8VXD2) P70 protein                                                    |
| LjSGA_062199.1.1 | 44  | partial | (Q8L9B0) Pathogenesis-related protein-like protein                      |
| LjSGA_062215.1   | 71  | partial | (Q6YSZ2) Hypothetical protein OSJNBa0003K21.26                          |
| LjSGA_062219.1   | 41  | partial | (Q7XHI5) Putative bHLH133 transcription factor                          |
| LjSGA_062290.2   | 47  | partial | (Q8W0W5) Repressor protein                                              |
| LjSGA_062471.1   | 110 | partial | (O22948) Putative salt-inducible protein                                |
| LjSGA_062507.1.1 | 99  | partial | (Q549W5) ASYMMETRIC LEAVES2-like gene 5 protein (Fragment)              |
| LjSGA_062634.1   | 61  | partial | (Q59IN6) Alcohol dehydrogenase (Fragment)                               |
| LjSGA_062793.1.1 | 57  | partial | (Q8H6U1) Cyclic nucleotide-gated channel C (Fragment)                   |
| LjSGA_062795.1   | 59  | partial | (Q7XVK2) OSJNBa0069D17.4 protein                                        |

|                  |     |         |                                                                                    |
|------------------|-----|---------|------------------------------------------------------------------------------------|
| LjSGA_062796.0.1 | 60  | partial | (Q2HVV5) Glyoxalase/bleomycin resistance protein/dioxygenase                       |
| LjSGA_062867.1   | 51  | partial | (Q6AVB5) Hypothetical protein OJ1212_C10.15                                        |
| LjSGA_062988.1.1 | 135 | partial | (Q53Q77) Hypothetical protein                                                      |
| LjSGA_063048.1   | 83  | partial | (Q7S5P3) Hypothetical protein                                                      |
| LjSGA_063081.1.1 | 50  | partial | (Q94EK6) Ferric-chelate reductase (Iron reductase)                                 |
| LjSGA_063118.0.1 | 65  | partial | (Q9FXK9) Microsomal omega-3 fatty acid desaturase                                  |
| LjSGA_063170.1.1 | 90  | partial | (Q45NK3) Hypothetical protein (Fragment)                                           |
| LjSGA_063197.1   | 85  | partial | (Q947L4) Glutathione reductase (Fragment)                                          |
| LjSGA_063224.1   | 40  | partial | (Q6H7Q8) Tubulin-specific chaperone C-like protein                                 |
| LjSGA_063231.1   | 77  | partial | (Q5XF11) At4g35930                                                                 |
| LjSGA_063379.1   | 66  | partial | (Q2R178) Expressed protein                                                         |
| LjSGA_063463.1   | 61  | partial | (Q9XIG1) Putative UDP-glucose:sterol glucosyltransferase (At1g43620)               |
| LjSGA_063781.1   | 98  | partial | (Q2HWB4) Cyclin-like F-box; F-box protein interaction domain                       |
| LjSGA_063914.1   | 45  | partial | (Q6E6L5) 5-enol-pyruvylshikimate-phosphate synthase                                |
| LjSGA_063967.1.2 | 37  | partial | (Q332W3) Photosystem II protein L (Fragment)                                       |
| LjSGA_064042.1   | 81  | partial | (Q39224) SRG1 protein (F6I1.30/F6I1.30) (At1g17020/F6I1.30)                        |
| LjSGA_064080.1.1 | 86  | partial | (Q7XTT6) OSJNBa0058K23.17 protein                                                  |
| LjSGA_064081.0.1 | 40  | partial | (Q24AV8) Ser/Thr protein phosphatase family protein                                |
| LjSGA_064123.1.1 | 47  | partial | (Q3ED75) Protein At1g21750                                                         |
| LjSGA_064146.1.1 | 77  | partial | (Q2HSV0) TGF-beta receptor, type I/II extracellular region                         |
| LjSGA_064162.1   | 95  | partial | (Q850Z5) Putative zinc finger protein (Putative GATA-type zinc finger protein)     |
| LjSGA_064371.1   | 70  | partial | (Q6YW27) Putative ADP-ribosylation factor 3                                        |
| LjSGA_064374.1   | 48  | partial | (Q6H704) Hypothetical protein P0030G02.24-1 (Hypothetical protein OJ1116_A06.34-1) |
| LjSGA_064466.1   | 77  | partial | (Q84PX1) Putative F-box protein (SKP1 interacting partner 3-related)               |
| LjSGA_064478.1.1 | 55  | partial | (Q45FY8) Coronatine-insensitive 1                                                  |

|                  |     |         |                                                                                                                   |
|------------------|-----|---------|-------------------------------------------------------------------------------------------------------------------|
| LjSGA_064493.0.1 | 45  | partial | (Q9LU67) Phosphatidylserine decarboxylase                                                                         |
| LjSGA_064695.1   | 61  | partial | unknown protein                                                                                                   |
| LjSGA_064771.0.1 | 37  | partial | (Q9FZ97) F3H9.11 protein                                                                                          |
| LjSGA_064782.1.1 | 103 | partial | (Q9FJ30) Similarity to heat shock transcription factor HSF30                                                      |
| LjSGA_064890.1.1 | 70  | partial | (Q6K1S6) Putative myb protein                                                                                     |
| LjSGA_065099.1.1 | 66  | partial | (Q84TL4) At5g04570                                                                                                |
| LjSGA_065206.1   | 61  | partial | (Q9SUE9) Hypothetical protein AT4g08310                                                                           |
| LjSGA_065337.1   | 76  | partial | (Q9FVD3) Hexokinase                                                                                               |
| LjSGA_065440.1.1 | 55  | partial | (Q6EUQ8) Hypothetical protein OJ1077_E05.12                                                                       |
| LjSGA_065543.1   | 117 | partial | (Q9LIM5) Arabidopsis thaliana genomic DNA, chromosome 3, BAC clone:F4B12 (Hypothetical protein At3g15095)         |
| LjSGA_065566.2   | 96  | partial | unknown protein                                                                                                   |
| LjSGA_065570.0.1 | 65  | partial | (Q9LXC9) Chloroplast inorganic pyrophosphatase (EC 3.6.1.1)                                                       |
| LjSGA_065606.1   | 43  | partial | (Q93VW9) AT5g53330/K19E1_13                                                                                       |
| LjSGA_065652.1   | 43  | partial | (O81097) RNA polymerase I, II and III 16.5 kDa subunit (At1g54250) (RNA polymerase II subunit, putative)          |
| LjSGA_065722.1   | 81  | partial | (Q8GWB1) Hypothetical protein At3g19895                                                                           |
| LjSGA_065797.1   | 59  | partial | (Q9MB26) Type 1 protein phosphatase-1                                                                             |
| LjSGA_065856.1.1 | 70  | partial | (Q9SGS2) T23E18.4 (Hypothetical protein At1g76110)                                                                |
| LjSGA_065924.1   | 46  | partial | (Q2W6C8) Acetylglutamate semialdehyde dehydrogenase                                                               |
| LjSGA_066050.2   | 63  | partial | (Q9FR42) Anther-specific myb-related protein 1                                                                    |
| LjSGA_066052.1   | 98  | partial | (Q9M3I0) Putative glucosyltransferase (Fragment)                                                                  |
| LjSGA_066171.1.1 | 64  | partial | (O49607) Subtilisin proteinase-like (Putative subtilisin serine protease) (Putative subtilisin serine proteinase) |
| LjSGA_066227.1   | 53  | partial | (Q6URA2) TIR-NBS-LRR type R protein 7                                                                             |
| LjSGA_066344.1   | 117 | partial | (Q9FY93) NAM-like protein (AT5g13180/T19L5_140)                                                                   |



|                  |     |         |                                                                              |
|------------------|-----|---------|------------------------------------------------------------------------------|
| LjSGA_066436.1   | 91  | partial | (Q9FFC3) Protease-like protein                                               |
| LjSGA_066495.1   | 84  | partial | (Q9T0I3) Hypothetical protein AT4g38750                                      |
| LjSGA_066699.1   | 50  | partial | (Q651M0) Putative membrane protein                                           |
| LjSGA_066793.1   | 52  | partial | (Q2R9P0) C2 domain, putative                                                 |
| LjSGA_066906.1   | 82  | partial | (Q9FUJ4) Ribulose-1,5-bisphosphate carboxylase small subunit rbcS3           |
| LjSGA_067014.1   | 74  | partial | (Q53M53) Hemolysin A, putative                                               |
| LjSGA_067208.1   | 54  | partial | (Q4A3I7) Myb-like protein                                                    |
| LjSGA_067265.1   | 105 | partial | (Q2HS67) F-box associated, putative                                          |
| LjSGA_067275.2   | 100 | partial | (Q84XT8) Hypothetical protein                                                |
| LjSGA_067327.1   | 62  | partial | (Q76I95) PHCLF2                                                              |
| LjSGA_067334.1   | 61  | partial | (Q5QT25) Putative proline synthetase associated protein (Fragment)           |
| LjSGA_067396.1   | 58  | partial | (Q8RY60) At1g47330/T3F24_2                                                   |
| LjSGA_067631.1   | 55  | partial | (Q5JKR0) Hypothetical protein B1064G04.19 (Hypothetical protein B1144D11.41) |
| LjSGA_067657.1.1 | 43  | partial | (Q6DBF1) At4g05000                                                           |
| LjSGA_067664.1   | 89  | partial | (Q9SFD7) T26F17.21                                                           |
| LjSGA_068072.1.1 | 44  | partial | (Q8LPV6) Pyruvate kinase-like (Fragment)                                     |
| LjSGA_068288.1   | 45  | partial | (Q6I5B9) Hypothetical protein OSJNBb0067H15.12                               |
| LjSGA_068530.1   | 50  | partial | (O49285) F22K20.9 protein (Hypothetical protein At1g76990) (ACR3)            |
| LjSGA_068643.1   | 53  | partial | (Q9MA61) F22F7.7 protein (Rad9 protein)                                      |
| LjSGA_068744.1   | 54  | partial | (Q5VMA7) Putative CPRD49                                                     |
| LjSGA_068754.2   | 38  | partial | (Q75GR5) Expressed protein                                                   |
| LjSGA_068816.1   | 225 | partial | (Q5R1K4) Hypothetical protein                                                |
| LjSGA_068839.1.1 | 29  | partial | (Q2TM92) Hypothetical protein (Fragment)                                     |
| LjSGA_068863.1   | 111 | partial | (Q3EDH9) Protein At1g06210                                                   |
| LjSGA_068939.1.1 | 102 | partial | (Q8WHM9) NADH dehydrogenase (Fragment)                                       |

|                  |     |         |                                                                                                     |
|------------------|-----|---------|-----------------------------------------------------------------------------------------------------|
| LjSGA_069132.1   | 174 | partial | (Q8RW95) AT5g38690/MBB18_24                                                                         |
| LjSGA_069480.1   | 96  | partial | (Q9LIH4) Arabidopsis thaliana genomic DNA, chromosome 3, P1 clone:MFD22                             |
| LjSGA_069502.1   | 49  | partial | (Q9FVD0) Diacylglycerol kinase variant A                                                            |
| LjSGA_069670.1.1 | 45  | partial | (Q5XWE3) Monodehydroascorbate reductase II (EC 1.6.5.4) (Fragment)                                  |
| LjSGA_069701.1   | 244 | partial | (Q949L3) Putative polyprotein (Fragment)                                                            |
| LjSGA_069846.2   | 92  | partial | (Q94C32) AT4g37280/C7A10_80                                                                         |
| LjSGA_070102.1   | 64  | partial | (Q9LFE9) Hypothetical protein F5E19_20                                                              |
| LjSGA_070133.1   | 60  | partial | (O80763) T13D8.29 protein (Hypothetical protein At1g60420)                                          |
| LjSGA_070253.1   | 91  | partial | (Q9LZR3) Hypothetical protein F17C15_180 (Glucosyltransferase-like protein) (AT5g03760/F17C15_180)  |
| LjSGA_070260.1   | 77  | partial | (Q8GRY6) Hypothetical protein At3g21710                                                             |
| LjSGA_070266.1   | 38  | partial | unknown protein                                                                                     |
| LjSGA_070303.1   | 53  | partial | (Q27JE5) Stress-induced transcription factor NAC1                                                   |
| LjSGA_070352.1   | 65  | partial | (Q9SUN6) Putative serine proteinase                                                                 |
| LjSGA_070371.2   | 93  | partial | (Q9FVQ0) Flavin-containing monooxygenase, putative (Flavin-containing monooxygenase family protein) |
| LjSGA_070700.1   | 81  | partial | (Q8W0Y5) Enod8.1                                                                                    |
| LjSGA_070713.1   | 161 | partial | (Q2LMD5) MYBR6                                                                                      |
| LjSGA_071014.1.1 | 47  | partial | (Q5BN14) Pyruvate decarboxylase 1 (EC 4.1.1.1) (Fragment)                                           |
| LjSGA_071025.1   | 70  | partial | (Q9C8A3) Acetyl-CoA synthetase, putative; 45051-31547                                               |
| LjSGA_071042.1.1 | 82  | partial | (Q683D2) Hypothetical protein At5g55060                                                             |
| LjSGA_071140.1   | 51  | partial | (Q5XVE4) Hypothetical protein                                                                       |
| LjSGA_071141.1   | 55  | partial | (Q6YUS6) Putative serine/threonine protein kinase                                                   |
| LjSGA_071172.1.1 | 47  | partial | (Q9LYX7) Hypothetical protein F15A17_110                                                            |
| LjSGA_071220.1   | 42  | partial | (O49436) Membrane-associated salt-inducible-like protein (Embryo-defective 1025)                    |

|                  |     |         |                                                                                                                         |
|------------------|-----|---------|-------------------------------------------------------------------------------------------------------------------------|
| LjSGA_071289.1   | 97  | partial | (Q45GJ7) Expressed protein                                                                                              |
| LjSGA_071437.1.1 | 55  | partial | (Q8GT65) Serpin-like protein (Fragment)                                                                                 |
| LjSGA_071506.1   | 51  | partial | (Q84J37) Putative laccase (Diphenol oxidase) family protein                                                             |
| LjSGA_071515.1   | 73  | partial | (Q84VB4) WD repeat protein (Fragment)                                                                                   |
| LjSGA_071685.1.1 | 56  | partial | (Q2HVT8) PDZ/DHR/GLGF                                                                                                   |
| LjSGA_071700.1   | 41  | partial | (Q6KC46) Rme-8 homologue (Fragment)                                                                                     |
| LjSGA_071738.1   | 45  | partial | (Q5YJN3) Diadenosine tetraphosphate hydrolase                                                                           |
| LjSGA_071832.1   | 60  | partial | (Q8LE50) Putative splicing factor                                                                                       |
| LjSGA_071950.1   | 60  | partial | (Q40556) Protein phosphatase 2A                                                                                         |
| LjSGA_072204.2   | 87  | partial | (Q7XAM5) Putative developmental protein sina                                                                            |
| LjSGA_072426.1   | 47  | partial | (Q940P8) AT5g20890/F22D1_60 (Hypothetical protein At5g20890) (T-complex protein 1, beta subunit) (Hypothetical protein) |
| LjSGA_072654.2   | 164 | partial | (Q8VWX5) Ribosome-like protein (Fragment)                                                                               |
| LjSGA_072918.1   | 71  | partial | (Q2HJ50) Hypothetical protein                                                                                           |
| LjSGA_072963.1   | 48  | partial | (Q53HZ4) Putative mitochondrial carrier protein (Fragment)                                                              |
| LjSGA_072997.0.1 | 58  | partial | (Q332T6) Ribosomal protein S19                                                                                          |
| LjSGA_073131.1   | 69  | partial | (Q6Z3N3) Putative villin                                                                                                |
| LjSGA_073263.1.1 | 32  | partial | (O22266) Hypothetical protein At2g47440                                                                                 |
| LjSGA_073276.1   | 61  | partial | (Q6NMJ6) At1g03260                                                                                                      |
| LjSGA_073332.1   | 87  | partial | (Q9FIV4) GblAAF23842.1                                                                                                  |
| LjSGA_073367.1   | 84  | partial | (Q7EXZ2) Putative SBP-domain protein                                                                                    |
| LjSGA_073478.1   | 32  | partial | (Q56ZV6) Hypothetical protein At5g14660                                                                                 |
| LjSGA_073481.1   | 98  | partial | (Q9FFB5) EmbiCAB89309.1                                                                                                 |
| LjSGA_073591.1   | 48  | partial | (Q9SL97) Hypothetical protein At2g25660                                                                                 |
| LjSGA_073599.1   | 46  | partial | (Q9FS26) Plastidic cysteine synthase 1                                                                                  |

|                  |     |         |                                                                                                         |
|------------------|-----|---------|---------------------------------------------------------------------------------------------------------|
| LjSGA_073818.2   | 43  | partial | (Q5ZDS6) Putative leucyl-tRNA synthetase                                                                |
| LjSGA_073862.1   | 86  | partial | (Q2TQ36) Transcription factor AP2D14 (Fragment)                                                         |
| LjSGA_073909.1.1 | 54  | partial | (Q2QSW7) M36658 histone H3                                                                              |
| LjSGA_073955.1   | 42  | partial | (Q9LUQ2) Leucine-rich repeat protein; contains similarity to elicitor-inducible receptor EIR            |
| LjSGA_073999.0.1 | 82  | partial | (Q8W228) Cytochrome P450                                                                                |
| LjSGA_074226.1   | 90  | partial | (Q3L234) Zinc finger protein                                                                            |
| LjSGA_074289.1.1 | 68  | partial | (Q2V4H1) Protein At1g53580                                                                              |
| LjSGA_074400.1   | 56  | partial | (Q75L11) Putative histone H2A                                                                           |
| LjSGA_074404.1   | 62  | partial | (Q8L9F9) Hypothetical protein                                                                           |
| LjSGA_074426.1   | 75  | partial | (Q6DBN1) At4g08455                                                                                      |
| LjSGA_074697.1   | 66  | partial | (Q2HUB1) Glycoside hydrolase, family 28                                                                 |
| LjSGA_074858.1   | 54  | partial | (Q5PNY9) At1g48460                                                                                      |
| LjSGA_074957.1.1 | 48  | partial | (Q403H0) Dihydroflavonol 4-reductase                                                                    |
| LjSGA_074964.1   | 88  | partial | (Q9FNN6) Similarity to I-box binding factor (Hypothetical protein At5g08520) (MYB transcription factor) |
| LjSGA_074970.2   | 103 | partial | (Q9LKA1) EmbiCAA17164.1 (At3g15040)                                                                     |
| LjSGA_075199.2   | 85  | partial | (Q6Z8E3) Putative ADP-ribosylation factor                                                               |
| LjSGA_075489.1   | 36  | partial | (Q4U3E9) Putative L24 ribosomal protein                                                                 |
| LjSGA_075692.1.1 | 73  | partial | (Q9C7N4) Lipase/hydrolase, putative; 118270-120144 (At1g29670/F15D2_22)                                 |
| LjSGA_075716.1   | 34  | partial | (Q6ID84) At2g46100                                                                                      |
| LjSGA_075719.1   | 78  | partial | (Q9MAT6) F13M7.13 protein (At1g04880)                                                                   |
| LjSGA_075722.1   | 43  | partial | (Q9SRP6) T21P5.16 protein (Hypothetical protein At3g03420)                                              |
| LjSGA_075756.0.1 | 61  | partial | (Q9SAI6) F23A5.7                                                                                        |
| LjSGA_075814.2   | 42  | partial | (Q8H6S5) CTV.2                                                                                          |
| LjSGA_075864.1   | 34  | partial | (Q6Z9U7) Putative mRNA cap methyltransferase                                                            |

|                  |     |         |                                                                                              |
|------------------|-----|---------|----------------------------------------------------------------------------------------------|
| LjSGA_076003.2   | 68  | partial | (Q9SB69) Hypothetical protein F22K18.50 (Hypothetical protein AT4g24750)                     |
| LjSGA_076010.1.1 | 47  | partial | (Q8RWX6) Hypothetical protein At2g46060                                                      |
| LjSGA_076227.1.1 | 61  | partial | (Q9FFC6) GDSL-motif lipase/hydrolase-like protein                                            |
| LjSGA_076256.1   | 64  | partial | (Q9CAC3) Hypothetical protein F5A18.8                                                        |
| LjSGA_076328.1.1 | 50  | partial | (Q7F1Y6) Putative ATP synthase mitochondrial F1 complex assembly factor2                     |
| LjSGA_076349.1   | 60  | partial | (Q67ZZ1) Hypothetical protein At2g41020                                                      |
| LjSGA_076367.1   | 70  | partial | (Q30CZ6) Putative chorismate mutase                                                          |
| LjSGA_076399.1   | 64  | partial | (Q9FXI9) F6F9.1 protein (At1g19940/F6F9_1)                                                   |
| LjSGA_076743.1.1 | 46  | partial | (Q7XSA2) OSJNBa0005N02.3 protein                                                             |
| LjSGA_076807.1   | 74  | partial | (O04043) F7G19.26                                                                            |
| LjSGA_076935.1   | 79  | partial | (Q9M8M9) Hypothetical protein T21F11.5                                                       |
| LjSGA_077184.1   | 43  | partial | (Q9SMQ5) Proliferating-cell nucleolar antigen-like protein                                   |
| LjSGA_077361.1   | 91  | partial | (Q6K7M5) Putative monooxygenase                                                              |
| LjSGA_077456.1.1 | 80  | partial | (Q2HUI7) Cyclin-like F-box; FBD; Zinc finger, FYVE/PHD-type                                  |
| LjSGA_077583.1   | 60  | partial | (Q9LFI5) Hypothetical protein F4P12_20 (Hypothetical protein At3g53320/F4P12_20) (At3g53320) |
| LjSGA_077751.1.1 | 43  | partial | (Q9ZPK0) Thiosulfate sulfurtransferase                                                       |
| LjSGA_077803.1   | 52  | partial | (Q9SS49) F14P13.2 protein                                                                    |
| LjSGA_077893.1   | 40  | partial | (Q9FNA2) Polyamine oxidase                                                                   |
| LjSGA_078041.1   | 63  | partial | (Q8VYM4) Hypothetical protein At3g52150                                                      |
| LjSGA_078084.1   | 134 | partial | (Q7XDY0) Transposon protein, putative, unclassified                                          |
| LjSGA_078148.1.1 | 46  | partial | (Q6Z1G4) Hypothetical protein OSJNBa0033D24.31-3 (Hypothetical protein P0665C04.12-3)        |
| LjSGA_078279.1.1 | 56  | partial | (Q880P8) Lactoylglutathione lyase                                                            |
| LjSGA_078390.1.1 | 42  | partial | (Q6YXJ6) Hypothetical protein B1029H08.25                                                    |
| LjSGA_078473.1   | 176 | partial | (Q4Q1R0) Universal minicircle sequence binding protein (UMSBP), putative                     |

|                  |     |         |                                                                                  |
|------------------|-----|---------|----------------------------------------------------------------------------------|
| LjSGA_078537.1   | 94  | partial | (Q45W75) Disease resistance-responsive family protein                            |
| LjSGA_078619.1   | 164 | partial | (Q9M0K9) Splicing factor At-SRp40 (Fragment)                                     |
| LjSGA_079032.1   | 85  | partial | (Q4FFY5) RNA polymerase beta" chain (Fragment)                                   |
| LjSGA_079055.1   | 105 | partial | (Q2LMD7) MYBR2                                                                   |
| LjSGA_079344.1   | 110 | partial | (Q9C6R0) Hypothetical protein T18I24.11                                          |
| LjSGA_079421.0.1 | 47  | partial | (Q9SNK4) EST AU068209(C12438) corresponds to a region of the predicted gene      |
| LjSGA_079423.1.1 | 57  | partial | (Q9FLH1) Lysosomal Pro-X carboxypeptidase                                        |
| LjSGA_079576.1   | 63  | partial | (Q93YF5) SET-domain-containing protein                                           |
| LjSGA_079580.1.1 | 101 | partial | (Q6DBF5) At1g31320                                                               |
| LjSGA_079583.1   | 58  | partial | (Q84VC8) Gamma hydroxybutyrate dehydrogenase-like protein (Hypothetical protein) |
| LjSGA_079640.1   | 64  | partial | (Q2V3W6) Protein At3g12530                                                       |
| LjSGA_079715.1   | 37  | partial | (Q75M66) Putative capping protein beta subunit                                   |
| LjSGA_079720.1   | 41  | partial | (Q9LUD7) Glucan synthase-like protein                                            |
| LjSGA_079831.1   | 100 | partial | (Q3EA57) Protein At4g10840                                                       |
| LjSGA_080081.1   | 51  | partial | (Q9LMT6) F2H15.16 (At1g17940)                                                    |
| LjSGA_080150.1   | 61  | partial | (Q43757) Ferritin precursor                                                      |
| LjSGA_080154.1.1 | 35  | partial | (Q588B7) Vacuolar Na <sup>+</sup> /H <sup>+</sup> antiporter                     |
| LjSGA_080231.2   | 53  | partial | (Q42606) Uroporphyrin III methylase (EC 2.1.1.107) (AT5g40850/MHK7_8)            |
| LjSGA_080251.1.2 | 81  | partial | (Q9SGA5) F1C9.14 protein (At3g02070)                                             |
| LjSGA_080274.2   | 51  | partial | (Q9M090) Kinase binding protein-like                                             |
| LjSGA_080430.1   | 80  | partial | (Q2V9A9) RabGAP/TBC domain-containing protein-like                               |
| LjSGA_080541.1   | 87  | partial | (Q6SRZ9) YABBY-like transcription factor PROLONGATA                              |
| LjSGA_080551.1   | 54  | partial | (Q30CZ6) Putative chorismate mutase                                              |
| LjSGA_080559.1   | 84  | partial | (Q6Z8A6) Zinc finger (C3HC4-type RING finger)-like                               |
| LjSGA_080760.1   | 63  | partial | (Q38M62) Hypothetical protein                                                    |

|                  |     |         |                                                                          |
|------------------|-----|---------|--------------------------------------------------------------------------|
| LjSGA_080839.1   | 193 | partial | (Q6DBE6) At1g30960                                                       |
| LjSGA_081129.2   | 61  | partial | (Q25AN2) H0212B02.1 protein                                              |
| LjSGA_081141.0.1 | 46  | partial | (Q7XTA4) OSJNBa0008A08.6 protein                                         |
| LjSGA_081515.1   | 36  | partial | (Q9M899) F16B3.4 protein                                                 |
| LjSGA_081518.1   | 63  | partial | (Q336P9) AT-Hook DNA-binding protein, putative                           |
| LjSGA_081571.1.1 | 81  | partial | (Q9LZX9) Hypothetical protein T4C21_260 (Hypothetical protein At3g60850) |
| LjSGA_081773.1   | 34  | partial | (Q9FYA3) Hypothetical protein T19L5_30 (At5g13070)                       |
| LjSGA_081950.1   | 44  | partial | (Q7XU45) OSJNBa0088I22.8 protein                                         |
| LjSGA_082085.1.1 | 69  | partial | (Q67UW7) Putative pentatricopeptide (PPR) repeat-containing protein      |
| LjSGA_082151.2   | 33  | partial | (Q2WEJ5) Polyubiquitin homolog (Fragment)                                |
| LjSGA_082156.1   | 68  | partial | (Q67Z52) Tubulin folding cofactor B                                      |
| LjSGA_082188.1   | 96  | partial | (Q45W75) Disease resistance-responsive family protein                    |
| LjSGA_082280.1.1 | 75  | partial | (Q9FQ45) Disrupted meiotic cDNA 1 protein (Fragment)                     |
| LjSGA_082431.1.1 | 93  | partial | (Q9SXB5) T28P6.5 protein                                                 |
| LjSGA_082615.1   | 91  | partial | (O49553) G10-like protein (AT4g21110/F7J7_50)                            |
| LjSGA_082669.1   | 129 | partial | (Q5ZBJ9) Pentatricopeptide (PPR) repeat-containing protein-like          |
| LjSGA_082902.1.1 | 67  | partial | (Q6E0J4) Hypothetical protein (Fragment)                                 |
| LjSGA_083111.1   | 86  | partial | (Q2RBP8) Mitochondrial carrier protein, putative                         |
| LjSGA_083270.1   | 37  | partial | (Q3E6Q7) Protein At2g44980                                               |
| LjSGA_083297.1   | 34  | partial | (Q2HW42) Phospholipase D/Transphosphatidylase; Pleckstrin-like           |
| LjSGA_083317.1   | 27  | partial | (Q682I4) Hypothetical protein At3g60150                                  |
| LjSGA_083468.1   | 37  | partial | (Q6TYR6) Beta-tubulin 2                                                  |
| LjSGA_083752.1   | 38  | partial | (P93115) Monogalactosyldiacylglycerol synthase (EC 2.4.1.46)             |
| LjSGA_083826.2   | 122 | partial | (Q9SU15) Hypothetical protein T20K18.60 (Hypothetical protein AT4g12710) |
| LjSGA_083942.2   | 82  | partial | (Q8LAY3) Inhibitor of apoptosis-like protein                             |

|                  |     |         |                                                                                                          |
|------------------|-----|---------|----------------------------------------------------------------------------------------------------------|
| LjSGA_084078.2   | 95  | partial | (Q9SUE7) Hypothetical protein T13J8.20 (Hypothetical protein AT4g27910)                                  |
| LjSGA_084218.1   | 47  | partial | (Q8RWZ0) Hypothetical protein At1g69060                                                                  |
| LjSGA_084225.1   | 79  | partial | (Q84VT8) APS-AA2 protein (Fragment)                                                                      |
| LjSGA_084236.1   | 47  | partial | (Q9C7B4) Hypothetical protein T2E22.5                                                                    |
| LjSGA_084398.1   | 49  | partial | (Q49KT5) Ribosomal protein L23                                                                           |
| LjSGA_084448.0.1 | 32  | partial | (Q8L4D9) Oxygen evolving complex protein, putative                                                       |
| LjSGA_084477.0.1 | 36  | partial | (Q259R9) H0403D02.15 protein                                                                             |
| LjSGA_084703.1.1 | 77  | partial | (Q2HS79) Cyclin-like F-box; Agenet                                                                       |
| LjSGA_084730.1.1 | 65  | partial | (Q9LS09) Anti-silencing protein-like (Anti-silencing factor 1-like protein) (Anti-silencing function 1b) |
| LjSGA_084734.1   | 212 | partial | (Q5B8Z1) Hypothetical protein                                                                            |
| LjSGA_084749.1   | 66  | partial | (Q84WD0) Putative leucine-rich repeat transmembrane protein kinase (Fragment)                            |
| LjSGA_084760.1   | 56  | partial | (Q9M3N2) Putative kinetochore protein (Fragment)                                                         |
| LjSGA_084767.1   | 59  | partial | (Q2PJR6) WRKY54                                                                                          |
| LjSGA_084959.1.1 | 49  | partial | (Q6H734) Putative DNA-damage inducible protein                                                           |
| LjSGA_085104.1   | 120 | partial | (Q94AH1) Hypothetical protein At3g05010                                                                  |
| LjSGA_085239.1   | 99  | partial | (O64703) MADS-box protein (AGL29)                                                                        |
| LjSGA_085241.1   | 118 | partial | (Q3EA42) Protein At4g13730                                                                               |
| LjSGA_085345.1   | 42  | partial | (Q6E6S6) FUL-like protein                                                                                |
| LjSGA_085402.1   | 66  | partial | (Q9FVU8) Putative UDP-glucose:glycoprotein glucosyltransferase; 101200-91134                             |
| LjSGA_085552.1   | 79  | partial | (Q58G16) Hypothetical protein                                                                            |
| LjSGA_085603.1   | 30  | partial | (Q9T088) Hypothetical protein AT4g27640                                                                  |
| LjSGA_085943.1   | 60  | partial | (Q69S57) Glucose/sorbose dehydrogenases-like protein                                                     |
| LjSGA_085944.1   | 53  | partial | (Q6XGX9) Putative oxalyl-CoA decarboxylase (Fragment)                                                    |
| LjSGA_086118.1   | 60  | partial | (Q9M8Z0) T6K12.4 protein                                                                                 |
| LjSGA_086121.1   | 155 | partial | (Q9SW48) Invertase-like protein (AT4g34860/F1111_100)                                                    |



|                  |     |         |                                                                                              |
|------------------|-----|---------|----------------------------------------------------------------------------------------------|
| LjSGA_086166.1   | 38  | partial | (Q9LKJ2) Cytosolic phosphoglycerate kinase                                                   |
| LjSGA_086267.1   | 43  | partial | (Q42681) Histone H3                                                                          |
| LjSGA_086309.1   | 102 | partial | (Q9SGH2) T13O15.10 protein                                                                   |
| LjSGA_086310.1   | 97  | partial | (Q5Z8A9) Putative wall-associated kinase 4                                                   |
| LjSGA_086355.0.1 | 74  | partial | (Q9FKU9) Berberine bridge enzyme-like protein                                                |
| LjSGA_086455.1   | 63  | partial | (Q8L6V6) Putative ripening related protein                                                   |
| LjSGA_086579.1   | 99  | partial | (Q2HS67) F-box associated, putative                                                          |
| LjSGA_086637.1   | 80  | partial | (Q7XTA3) OSJNBa0008A08.7 protein                                                             |
| LjSGA_086690.1   | 63  | partial | (Q9FIJ5) Arabidopsis thaliana genomic DNA, chromosome 5, P1 clone:MCA23 (AT5g47860/MCA23_20) |
| LjSGA_086809.1   | 91  | partial | (Q94IB4) WRKY DNA-binding protein (Fragment)                                                 |
| LjSGA_086825.1   | 58  | partial | (Q6K8Z1) Hypothetical protein OJ1695_H09.11                                                  |
| LjSGA_086966.1   | 70  | partial | (Q6EEW1) Cyclin T1                                                                           |
| LjSGA_087152.1   | 59  | partial | (O48791) Hypothetical protein At2g26770                                                      |
| LjSGA_087318.1   | 51  | partial | (Q8H0W0) Hypothetical protein At1g73060                                                      |
| LjSGA_087334.1   | 108 | partial | (Q9C986) Hypothetical protein F23O10.3                                                       |
| LjSGA_087354.1   | 65  | partial | unknown protein                                                                              |
| LjSGA_087563.1   | 43  | partial | (Q8VY97) Hypothetical protein At4g32130; F10N7.60 (Hypothetical protein At4g32130)           |
| LjSGA_087574.0.1 | 71  | partial | (Q2V991) ArcA2 protein-like                                                                  |
| LjSGA_087740.1.1 | 63  | partial | (Q9ASV4) AT3g06720/F3E22_14                                                                  |
| LjSGA_087765.1   | 93  | partial | (Q949L4) Putative polyprotein (Fragment)                                                     |
| LjSGA_087807.1   | 33  | partial | (Q5NDD2) Putative MYB transcription factor                                                   |
| LjSGA_087867.1   | 37  | partial | (Q6Z748) RING zinc finger protein-like                                                       |
| LjSGA_087889.1   | 36  | partial | (Q9C5H6) Putative transporter protein                                                        |
| LjSGA_088063.1   | 88  | partial | (Q69IN4) Ribonucleoprotein antigen-like                                                      |

|                  |     |         |                                                             |
|------------------|-----|---------|-------------------------------------------------------------|
| LjSGA_088187.1   | 43  | partial | unknown protein                                             |
| LjSGA_088362.1   | 155 | partial | (Q9FG26) Non-LTR retroelement reverse transcriptase-like    |
| LjSGA_088433.1   | 94  | partial | (Q2XTB4) Hypothetical protein                               |
| LjSGA_088449.1   | 69  | partial | (Q7XU07) OSJNBb0012E24.3 protein                            |
| LjSGA_088467.1   | 54  | partial | (Q501D0) At3g47010                                          |
| LjSGA_088656.1   | 53  | partial | (Q9AUK5) Putative exostoses                                 |
| LjSGA_088723.1   | 109 | partial | (Q9SCZ0) Nonspecific lipid-transfer protein (LTP)           |
| LjSGA_088914.2   | 127 | partial | (O82343) Expressed protein (Hypothetical protein At2g46260) |
| LjSGA_089374.1   | 62  | partial | (Q8H1E1) Hypothetical protein At4g08540                     |
| LjSGA_089725.1   | 52  | partial | (Q7X8B5) Cation-transporting ATPase                         |
| LjSGA_089796.1   | 47  | partial | (Q6ZDG9) Putative SEC23                                     |
| LjSGA_089888.1.1 | 58  | partial | (Q58FG4) Homogentisate phytylprenyltransferase              |
| LjSGA_089915.0.1 | 72  | partial | (Q9ZVY8) T25N20.15                                          |
| LjSGA_090311.1   | 106 | partial | (Q2MJ18) Cytochrome P450 monooxygenase CYP72B               |
| LjSGA_090331.1   | 37  | partial | (O22791) Putative RNA-binding protein                       |
| LjSGA_090334.1   | 49  | partial | (Q2MIZ8) Cytochrome P450 monooxygenase CYP711A              |
| LjSGA_090516.1   | 94  | partial | (Q3HVP0) 60s acidic ribosomal protein-like protein          |
| LjSGA_090522.1   | 79  | partial | (Q5FAL6) Putative Expressed protein                         |
| LjSGA_090585.1   | 57  | partial | (Q6Z553) Hypothetical protein OSJNBa0007M04.36              |
| LjSGA_090586.1   | 75  | partial | (Q93XA7) NAC domain protein NAC1                            |
| LjSGA_090591.1.1 | 24  | partial | (Q9CAR6) Putative alpha-amylase; 60344-64829                |
| LjSGA_090701.1.1 | 53  | partial | (Q69UH7) Putative SERK1 protein                             |
| LjSGA_090897.2   | 40  | partial | (Q570P1) Hypothetical protein At3g20300                     |
| LjSGA_090900.1   | 46  | partial | (Q9MAV9) Cytoplasmic ribosomal protein S13                  |
| LjSGA_091066.1   | 73  | partial | (Q9FIL1) Protein kinase-like protein (AT5g59010/k19m22_210) |

|                  |     |         |                                                        |
|------------------|-----|---------|--------------------------------------------------------|
| LjSGA_091069.2   | 68  | partial | (Q5Y836) ERF transcription factor 5                    |
| LjSGA_091092.1   | 66  | partial | (Q3EDI9) Protein At1g03960                             |
| LjSGA_091177.2   | 44  | partial | (Q4FG34) Ribosomal protein S12 (Fragment)              |
| LjSGA_091178.0.1 | 39  | partial | (Q3C1N5) Ribosomal protein L23                         |
| LjSGA_091222.1.1 | 47  | partial | (Q9XGC0) Starch synthase isoform SS III (EC 2.4.1.21)  |
| LjSGA_091245.1   | 53  | partial | (Q3E9E3) Protein At5g18700                             |
| LjSGA_091309.1.1 | 41  | partial | (Q9FLD7) Glycosylation enzyme-like protein (At5g39990) |
| LjSGA_091385.2   | 225 | partial | (Q4A185) Beclin 1 protein                              |
| LjSGA_091481.1   | 152 | partial | (Q5IY47) DNA binding protein WRKY2                     |
| LjSGA_091516.1   | 161 | partial | (Q5DJU1) Fas-associated factor 1-like protein          |
| LjSGA_091700.1   | 39  | partial | (Q2PF88) KANADI-like transcription factor FEATHERED    |
| LjSGA_091734.1   | 95  | partial | (Q84QZ3) Hypothetical protein OSJNBa0093I13.23         |
| LjSGA_091763.1   | 41  | partial | (Q8LG57) Dihydroxypolyprenylbenzoate methyltransferase |
| LjSGA_091946.2   | 78  | partial | (Q6XBF8) CDR1                                          |
| LjSGA_092077.2   | 62  | partial | (Q9FV39) 1-deoxy-D-xylulose-5-phosphate synthase       |
| LjSGA_092108.1   | 54  | partial | (Q9STY4) Hypothetical protein T21L8.140                |
| LjSGA_092110.2   | 73  | partial | (Q6ET26) Putative MFAP1 protein                        |
| LjSGA_092168.2   | 56  | partial | (Q94CA0) Hypothetical protein At1g77220                |
| LjSGA_092238.1.1 | 73  | partial | (Q9LIE7) Selenium-binding protein-like                 |
| LjSGA_092281.1   | 65  | partial | (Q6ZDG9) Putative SEC23                                |
| LjSGA_092289.1   | 39  | partial | (Q84TS1) Hypothetical protein OSJNBb0097F01.10         |
| LjSGA_092400.2   | 88  | partial | (Q949L3) Putative polyprotein (Fragment)               |
| LjSGA_092415.1   | 55  | partial | (Q6RUF6) Fructose-bisphosphate aldolase (EC 4.1.2.13)  |
| LjSGA_092549.1   | 50  | partial | (Q8S9Z2) Putative dTDP-glucose 4,6-dehydratase         |
| LjSGA_092672.1.1 | 200 | partial | (Q5QMN8) Hypothetical protein P0419B01.2               |

|                  |     |         |                                                                                    |
|------------------|-----|---------|------------------------------------------------------------------------------------|
| LjSGA_093087.1.1 | 56  | partial | (Q6NL19) At1g20890                                                                 |
| LjSGA_093090.1   | 26  | partial | (Q2V603) Hypothetical protein                                                      |
| LjSGA_093273.1.1 | 78  | partial | (Q8L733) Hypothetical protein At4g12130                                            |
| LjSGA_093466.1.1 | 39  | partial | (Q8GYJ1) Hypothetical protein                                                      |
| LjSGA_093476.1   | 106 | partial | (Q8GUH2) Expressed protein (At1g01500)                                             |
| LjSGA_093583.1   | 121 | partial | (O65281) Arabidopsis thaliana homeodomain protein AHDP (SP:P93041)                 |
| LjSGA_093663.1   | 84  | partial | (Q9FY93) NAM-like protein (AT5g13180/T19L5_140)                                    |
| LjSGA_093673.1   | 30  | partial | (Q9FNK4) Ornithine aminotransferase (At5g46180)                                    |
| LjSGA_093680.1   | 39  | partial | (Q7XKL1) OSJNBb0061C13.8 protein                                                   |
| LjSGA_093726.1   | 63  | partial | (Q9FR42) Anther-specific myb-related protein 1                                     |
| LjSGA_093918.1   | 325 | partial | (Q41805) Extensin-like protein precursor                                           |
| LjSGA_093919.1.1 | 35  | partial | (Q4U3E9) Putative L24 ribosomal protein                                            |
| LjSGA_094037.1.1 | 50  | partial | (Q45W70) Isomerase-like protein                                                    |
| LjSGA_094296.1   | 96  | partial | (Q5Z7T6) Hypothetical protein OJ1136_F03.14                                        |
| LjSGA_094332.0.2 | 37  | partial | (Q332W3) Photosystem II protein L (Fragment)                                       |
| LjSGA_094364.1   | 41  | partial | (Q9LZK5) Hypothetical protein F26K9_30 (At3g62600/F26K9_30) (Hypothetical protein) |
| LjSGA_094376.0.1 | 103 | partial | (Q2L922) Chloroplast envelope membrane protein                                     |
| LjSGA_094495.1   | 71  | partial | (Q2HJ50) Hypothetical protein                                                      |
| LjSGA_094496.1   | 27  | partial | (Q2V3A6) Protein At5g02840                                                         |
| LjSGA_094729.1.1 | 72  | partial | (Q9C660) Pto kinase interactor, putative                                           |
| LjSGA_094936.1   | 102 | partial | (Q6ZDR7) Putative splicing factor, arginine/serine-rich                            |
| LjSGA_094942.1   | 68  | partial | (Q9XFL4) Peroxidase 3                                                              |
| LjSGA_094977.2   | 89  | partial | (Q3ED88) Protein At1g20510                                                         |
| LjSGA_095214.1   | 73  | partial | (Q6IVK7) Putative UDP-glucose dehydrogenase 1 (EC 1.1.1.22)                        |
| LjSGA_095234.1   | 56  | partial | (Q6K4Q2) Hypothetical protein OSJNBa0054K20.7 (Hypothetical protein OJ1316_E06.21) |

|                  |     |         |                                                                                                                  |
|------------------|-----|---------|------------------------------------------------------------------------------------------------------------------|
| LjSGA_095318.1   | 60  | partial | (Q2MGR5) Glycoside hydrolase, family 28                                                                          |
| LjSGA_095386.1   | 44  | partial | (Q2QX53) N-acylethanolamine amidohydrolase                                                                       |
| LjSGA_095451.1   | 219 | partial | (Q9FFV8) Similarity to guanine nucleotide exchange factor (Hypothetical protein At5g38640; MBB18.19) (At5g38640) |
| LjSGA_095591.1.1 | 51  | partial | (Q9LK77) Similarity to acyl-CoA thioesterase (At5g48370)                                                         |
| LjSGA_095600.1   | 64  | partial | (Q6H7M7) Putative outer envelope membrane protein OEP75                                                          |
| LjSGA_095834.1   | 34  | partial | (Q8RWW6) Putative isoamylase                                                                                     |
| LjSGA_095900.1.1 | 71  | partial | (Q5VRL4) Putative syntaxin of plants 41                                                                          |
| LjSGA_095971.2.1 | 55  | partial | (Q9M3Y5) 25.7 kDa protein                                                                                        |
| LjSGA_096037.1   | 62  | partial | (Q8VZB8) Hypothetical protein At5g55810; MDF20.25 (Hypothetical protein At5g55810)                               |
| LjSGA_096057.1   | 34  | partial | (Q94AG4) AT5g52920/MXC20_15                                                                                      |
| LjSGA_096058.1   | 43  | partial | (Q8LEW9) Hypothetical protein                                                                                    |
| LjSGA_096121.1   | 62  | partial | (Q9SJI1) Expressed protein (At2g42750/F7D19.25) (Hypothetical protein)                                           |
| LjSGA_096269.1   | 83  | partial | (Q8GWF9) Hypothetical protein At5g57700/MRI1_6                                                                   |
| LjSGA_096306.0.1 | 39  | partial | (Q332X9) Photosystem I P700 chlorophyll A apoprotein A2                                                          |
| LjSGA_096314.1   | 122 | partial | (Q8W468) Hypothetical protein At1g65430; T8F5.21 (Hypothetical protein At1g65430) (ARIADNE-like protein ARI8)    |
| LjSGA_096344.0.1 | 47  | partial | (Q8H0U0) T-complex polypeptide 1 homologue                                                                       |
| LjSGA_096465.1   | 60  | partial | (Q9SUQ2) Putative Ap2 domain protein (AT4g23750/F9D16_220) (At4g23750)                                           |
| LjSGA_096648.2.1 | 114 | partial | (Q9MBE8) Cytochrome P450                                                                                         |
| LjSGA_096670.1.1 | 49  | partial | (Q9LXQ8) Hypothetical protein T20N10_290                                                                         |
| LjSGA_096678.1   | 83  | partial | (Q949Q7) Putative serine carboxypeptidase II                                                                     |
| LjSGA_096750.1   | 67  | partial | (Q94JS1) AT4g26860/F10M23_200 (Putative proline synthetase associated protein)                                   |
| LjSGA_096761.1.1 | 50  | partial | (Q2R227) RING-H2 zinc finger protein, putative                                                                   |
| LjSGA_096940.1   | 46  | partial | (Q38RG6) Chorismate synthase                                                                                     |

|                  |     |         |                                                                            |
|------------------|-----|---------|----------------------------------------------------------------------------|
| LjSGA_097197.1.1 | 36  | partial | (O48785) Putative second messenger-dependent protein kinase                |
| LjSGA_097321.1   | 83  | partial | (Q3EA36) Protein At4g14160                                                 |
| LjSGA_097379.1   | 66  | partial | (Q9M9H4) F14O23.10 protein                                                 |
| LjSGA_097535.1   | 181 | partial | (Q6FY25) Similar to splP32380 <i>Saccharomyces cerevisiae</i> YDR356w NUF1 |
| LjSGA_097657.1   | 84  | partial | (Q3MGX0) ATPase                                                            |
| LjSGA_097839.1   | 60  | partial | (Q9CAU8) Hypothetical protein T9J14.23                                     |
| LjSGA_098057.1   | 41  | partial | (Q6ZGD1) DENN (AEX-3) domain-containing protein-like                       |
| LjSGA_098110.1   | 60  | partial | (Q9LRV9) Probable selenium-binding protein                                 |
| LjSGA_098267.1   | 55  | partial | (Q6EN40) Tetratricopeptide repeat (TPR)-containing protein-like            |
| LjSGA_098323.1.1 | 85  | partial | (Q2HUA0) Hypothetical protein                                              |
| LjSGA_098539.1.2 | 37  | partial | (Q332W3) Photosystem II protein L (Fragment)                               |
| LjSGA_098542.1   | 46  | partial | (Q7GB12) Mitochondrial F1-ATPase, gamma subunit (ATP3_ARATH)               |
| LjSGA_098551.1   | 68  | partial | (Q258Y8) H0624F09.10 protein                                               |
| LjSGA_098774.1.1 | 37  | partial | (Q9MAI7) F12M16.4                                                          |
| LjSGA_098973.1   | 66  | partial | (Q8GT65) Serpin-like protein (Fragment)                                    |
| LjSGA_098999.1.1 | 58  | partial | (Q9LIE7) Selenium-binding protein-like                                     |
| LjSGA_098999.2   | 63  | partial | (Q945B8) Growth-on protein GRO10                                           |
| LjSGA_099264.1   | 41  | partial | (Q8LAY7) Hypothetical protein                                              |
| LjSGA_099424.2   | 51  | partial | (Q9ZS31) NL27                                                              |
| LjSGA_099517.1   | 347 | partial | (Q9SU33) PEARLI 1-like protein (At4g12500)                                 |
| LjSGA_099700.1   | 54  | partial | (Q69SU8) Putative tetratricopeptide repeat (TPR)-containing protein        |
| LjSGA_099719.2   | 64  | partial | (O49396) Putative cytochrome P450                                          |
| LjSGA_099741.1   | 61  | partial | (Q5XF05) At1g56440                                                         |
| LjSGA_099748.1   | 61  | partial | (Q9AV77) 60S ribosomal protein L17                                         |
| LjSGA_099753.1   | 149 | partial | (Q949L4) Putative polyprotein (Fragment)                                   |

|                  |     |         |                                                                                                |
|------------------|-----|---------|------------------------------------------------------------------------------------------------|
| LjSGA_099898.1   | 107 | partial | (Q3EC95) Protein At1g80960                                                                     |
| LjSGA_099955.1   | 50  | partial | (Q9SU03) Hydrolase-like protein                                                                |
| LjSGA_099985.1   | 36  | partial | (Q4PKE6) Calcium-dependent protein kinase (Fragment)                                           |
| LjSGA_100030.1   | 47  | partial | (Q9ATR0) Brassinosteroid biosynthetic protein LKB                                              |
| LjSGA_100037.1   | 86  | partial | (Q6GL15) MGC69190 protein                                                                      |
| LjSGA_100072.1   | 82  | partial | (Q9M8N0) Hypothetical protein T21F11.4 (Hypothetical protein)                                  |
| LjSGA_100216.1   | 70  | partial | (O49012) Beta-1,3-glucanase 3 (Fragment)                                                       |
| LjSGA_100314.1   | 88  | partial | (Q9FKK2) MADS-box protein-like                                                                 |
| LjSGA_100455.2.1 | 37  | partial | (Q2WGL6) Cycloartenol synthase                                                                 |
| LjSGA_100683.2.1 | 104 | partial | (Q9LYD3) Putative AP2/EREBP transcription factor (DREB3)                                       |
| LjSGA_100733.1   | 44  | partial | (Q39755) FSGTP1                                                                                |
| LjSGA_100828.2   | 56  | partial | (Q4ACU9) Thioredoxin h                                                                         |
| LjSGA_101389.1   | 47  | partial | (Q948P0) Aspartic proteinase 2                                                                 |
| LjSGA_102284.1   | 70  | partial | (Q53LH8) Dna-directed rna polymerase ii 8.2 kDa polypeptide (Ec 2.7.7.6)(Rpb10) (Rp10) (Abc10) |
| LjSGA_102334.1   | 57  | partial | (Q9M075) Putative poly(A) polymerase                                                           |
| LjSGA_102491.1   | 226 | partial | (Q3L234) Zinc finger protein                                                                   |
| LjSGA_102681.1.1 | 76  | partial | (Q67ZF6) Putative cytochrome B561                                                              |
| LjSGA_102939.1   | 81  | partial | (Q8L4W8) P0696G06.27 protein                                                                   |
| LjSGA_102946.1   | 145 | partial | (Q8GXI5) Hypothetical protein At1g79070/YUP8H12R_17 (Hypothetical protein At1g79070)           |
| LjSGA_102957.1   | 287 | partial | (Q6UUN6) Putative poly(A)-binding protein                                                      |
| LjSGA_103070.2   | 92  | partial | (Q9FT50) Hypothetical protein T25B15_90                                                        |
| LjSGA_103158.1   | 37  | partial | (Q6DBN5) At5g05230                                                                             |
| LjSGA_103351.1   | 189 | partial | (Q6Z9C8) Putative heat shock factor RHSF2                                                      |
| LjSGA_103572.0.1 | 39  | partial | (Q6ASS7) MSI type nucleosome/chromatin assembly factor C, putative                             |

|                  |     |         |                                                                           |
|------------------|-----|---------|---------------------------------------------------------------------------|
| LjSGA_103592.1   | 20  | partial | (Q9MD76) NADH dehydrogenase subunit 9                                     |
| LjSGA_103603.1   | 97  | partial | (Q9FRS3) F22O13.10                                                        |
| LjSGA_103614.0.1 | 34  | partial | (Q84NP4) Hypothetical protein P0034A04.133                                |
| LjSGA_103661.1.1 | 86  | partial | (Q8GT65) Serpin-like protein (Fragment)                                   |
| LjSGA_103672.1   | 88  | partial | (Q541V7) Hypothetical protein At2g24330                                   |
| LjSGA_103903.1.1 | 102 | partial | (Q3EB63) Protein At3g14350                                                |
| LjSGA_104179.1   | 66  | partial | (O81976) 14-3-3 Protein (Fragment)                                        |
| LjSGA_104188.1   | 95  | partial | (Q9LF17) Hypothetical protein T21H19_30                                   |
| LjSGA_104392.2   | 52  | partial | (Q9C817) Hypothetical protein F19K6.19 (Fragment)                         |
| LjSGA_104812.1   | 68  | partial | (Q84L44) Putative histone H2A                                             |
| LjSGA_105186.1   | 29  | partial | (Q6IEP2) WRKY transcription factor 39                                     |
| LjSGA_105195.1   | 73  | partial | (Q69SH7) Putative pantothenate kinase 4                                   |
| LjSGA_105402.1   | 282 | partial | (Q38B00) Universal minicircle sequence binding protein (UMSBP), putative  |
| LjSGA_105731.1   | 57  | partial | (Q8RXS4) Putative N2,N2-dimethylguanine tRNA methyltransferase (Fragment) |
| LjSGA_105787.1   | 221 | partial | (Q517D6) Latent nuclear antigen, putative                                 |
| LjSGA_106026.1   | 88  | partial | (Q9M033) Hypothetical protein T10O8_110                                   |
| LjSGA_106027.1   | 76  | partial | (Q8GVF5) Putative eukaryotic translation initiation factor 6              |
| LjSGA_106087.2   | 41  | partial | (Q2Z1Y8) 1-acyl-sn-glycerol-3-phosphate acyltransferase                   |
| LjSGA_106147.1   | 66  | partial | (O65750) 26S protease regulatory subunit 6 (Fragment)                     |
| LjSGA_106280.1.1 | 61  | partial | (Q84ZV2) Hypothetical protein                                             |
| LjSGA_106299.1   | 41  | partial | (Q9SCV9) Putative beta-galactosidase (EC 3.2.1.23)                        |
| LjSGA_106313.1.1 | 81  | partial | unknown protein                                                           |
| LjSGA_106315.1   | 62  | partial | (Q6TAS3) Aminodeoxychorismate synthase/glutamine amidotransferase         |
| LjSGA_106674.1   | 46  | partial | (Q6H7N3) Putative DnaJ homolog, subfamily C, member 9                     |
| LjSGA_107216.2.1 | 59  | partial | (Q67IN9) Ribosomal protein S7                                             |



|                  |     |         |                                                                         |
|------------------|-----|---------|-------------------------------------------------------------------------|
| LjSGA_107581.1   | 50  | partial | (Q4PSM7) Putative LOB domain protein                                    |
| LjSGA_107886.1.1 | 63  | partial | unknown protein                                                         |
| LjSGA_107958.1   | 53  | partial | (Q6EPP4) EL5-like                                                       |
| LjSGA_107962.1   | 59  | partial | (Q8VYU5) At1g18700/F6A14_19                                             |
| LjSGA_107973.1   | 65  | partial | (Q6NMR9) At5g45920                                                      |
| LjSGA_108231.1.1 | 43  | partial | (Q5E916) At2g25740                                                      |
| LjSGA_108333.0.1 | 35  | partial | (Q7XSB8) OJ990528_30.5 protein                                          |
| LjSGA_108573.1   | 49  | partial | (Q9LF57) Farnesylated protein ATFP6-like protein                        |
| LjSGA_110000.1.1 | 86  | partial | (Q656N0) Putative STH1 protein                                          |
| LjSGA_110024.1   | 179 | partial | (Q2JWX2) Putative RNA-binding protein                                   |
| LjSGA_110307.1   | 52  | partial | (Q93YQ1) Hypothetical protein T16O11.22 (Raptor1B) (At3g08850)          |
| LjSGA_110980.1   | 268 | partial | (Q4FX62) Proteophosphoglycan 5                                          |
| LjSGA_111083.1   | 50  | partial | (O23551) Hypothetical protein AT4g17070                                 |
| LjSGA_111560.1   | 71  | partial | (O22733) F11P17.15 protein                                              |
| LjSGA_111572.2   | 35  | partial | (Q945N9) Prunasin hydrolase isoform PH B (EC 3.2.1.118) (Fragment)      |
| LjSGA_111734.1   | 45  | partial | (Q941I0) Putative quinone oxidoreductase (Fragment)                     |
| LjSGA_112262.1   | 55  | partial | (Q9FK05) Pectinesterase                                                 |
| LjSGA_112271.1   | 99  | partial | (O81834) Hypothetical protein AT4g27310                                 |
| LjSGA_112406.1   | 29  | partial | (Q9SZW8) Hypothetical protein F6G3.180 (Hypothetical protein AT4g30150) |
| LjSGA_112428.1   | 56  | partial | (Q5VPG9) DNA-binding bromodomain-containing protein-like                |
| LjSGA_112675.1   | 41  | partial | (Q9M9H4) F14O23.10 protein                                              |
| LjSGA_112923.1   | 40  | partial | (Q2A0N7) COP9 signalosome subunit 6                                     |
| LjSGA_113067.1   | 58  | partial | (Q5NBI1) Putative cysteine proteinase inhibitor                         |
| LjSGA_113232.1   | 48  | partial | (Q9LFA1) Hypothetical protein F8J2_70                                   |
| LjSGA_113358.1   | 63  | partial | (Q9ZW93) F5A8.5 protein                                                 |

|                  |     |         |                                                                                |
|------------------|-----|---------|--------------------------------------------------------------------------------|
| LjSGA_113468.1   | 50  | partial | (Q3EBU0) Protein At2g25850                                                     |
| LjSGA_113657.0.1 | 39  | partial | (Q49KT4) Ribosomal protein L2                                                  |
| LjSGA_113687.2   | 65  | partial | (Q2L962) Cytochrome c heme attachment protein                                  |
| LjSGA_113699.1   | 76  | partial | (Q9XH70) Hypothetical protein p69RF (Fragment)                                 |
| LjSGA_113851.1.1 | 50  | partial | (Q9ZV85) F9K20.29 protein (At1g78670/F9K20_29)                                 |
| LjSGA_113853.1   | 43  | partial | (Q40464) NTGB3 (Fragment)                                                      |
| LjSGA_114084.1   | 244 | partial | (Q7S753) Hypothetical protein                                                  |
| LjSGA_114657.1   | 44  | partial | (Q39890) Calmodulin                                                            |
| LjSGA_114954.1   | 48  | partial | (Q9M305) Hypothetical protein T21J18_40                                        |
| LjSGA_115011.1   | 52  | partial | (Q9C9W6) Putative trehalose-6-phosphate synthase; 46897-44149                  |
| LjSGA_115052.1   | 46  | partial | (Q94JS1) AT4g26860/F10M23_200 (Putative proline synthetase associated protein) |
| LjSGA_115232.1   | 78  | partial | (Q9GV13) Vasa-related protein CnVAS1                                           |
| LjSGA_115298.1   | 45  | partial | (Q6E6L5) 5-enol-pyruvylshikimate-phosphate synthase                            |
| LjSGA_115646.1   | 74  | partial | (Q56W60) Hypothetical protein At5g12370                                        |
| LjSGA_115723.1   | 146 | partial | (Q949L3) Putative polyprotein (Fragment)                                       |
| LjSGA_116165.1.1 | 78  | partial | (Q5KQN4) Putative LIM domain containing protein                                |
| LjSGA_116239.1   | 212 | partial | (Q8LJR7) Hypothetical protein                                                  |
| LjSGA_116240.1   | 60  | partial | (Q7XPH4) OSJNBb0003B01.9 protein                                               |
| LjSGA_116402.1   | 36  | partial | (Q84YG5) Isoamylase isoform 3                                                  |
| LjSGA_116551.1   | 26  | partial | (Q3E6Q7) Protein At2g44980                                                     |
| LjSGA_116558.0.1 | 47  | partial | (Q7F0Q2) Putative 3-oxo-5-alpha-steroid 4-dehydrogenase                        |
| LjSGA_116672.1   | 245 | partial | (Q84J64) WRKY transcription factor 22                                          |
| LjSGA_116907.1   | 78  | partial | (Q3EB44) Protein At3g19000                                                     |
| LjSGA_117171.1   | 48  | partial | (Q6Z1G7) Putative pyruvate dehydrogenase E1 beta subunit isoform 1 protein     |
| LjSGA_117427.1   | 94  | partial | (Q6TY49) Reductase 1                                                           |

|                  |     |         |                                                                            |
|------------------|-----|---------|----------------------------------------------------------------------------|
| LjSGA_117586.1   | 40  | partial | (Q7XAF0) Tocopherol cyclase                                                |
| LjSGA_117992.1.1 | 76  | partial | (Q9FFU2) Genomic DNA, chromosome 5, P1 clone:MBG8 (AT5g54880/MBG8_15)      |
| LjSGA_117996.1   | 331 | partial | (Q7XP86) OSJNBa0021F22.14 protein                                          |
| LjSGA_118021.1   | 93  | partial | (Q94CH3) Seven transmembrane protein Mlo2                                  |
| LjSGA_118130.1   | 96  | partial | (Q9FJ30) Similarity to heat shock transcription factor HSF30               |
| LjSGA_118133.1   | 74  | partial | (Q3LHL0) TATA binding protein associated factor                            |
| LjSGA_118572.2   | 61  | partial | (Q9SUQ2) Putative Ap2 domain protein (AT4g23750/F9D16_220) (At4g23750)     |
| LjSGA_118984.2   | 48  | partial | (Q8LEG7) Protein kinase-like protein                                       |
| LjSGA_118993.1.1 | 31  | partial | (Q9SD20) MS5-like protein (At3g51280)                                      |
| LjSGA_119042.1   | 102 | partial | (Q6FNZ3) Similar to splP53849 <i>Saccharomyces cerevisiae</i> YNL255c GIS2 |
| LjSGA_119211.1   | 35  | partial | (Q4U3E9) Putative L24 ribosomal protein                                    |
| LjSGA_119220.1   | 39  | partial | (Q6QP53) Hypothetical protein                                              |
| LjSGA_119280.1   | 29  | partial | (Q8GYR4) Hypothetical protein At3g08620/F17O14_9                           |
| LjSGA_119354.1.1 | 42  | partial | (Q8L586) Hypothetical protein At4g09580                                    |
| LjSGA_119414.1   | 66  | partial | (Q9ZW93) F5A8.5 protein                                                    |
| LjSGA_119616.1   | 91  | partial | (Q3E8M1) Protein At5g37340                                                 |
| LjSGA_119745.1.1 | 49  | partial | (Q84R15) Hypothetical protein At2g07370 (Hypothetical protein At2g07360)   |
| LjSGA_119896.1   | 70  | partial | (Q8VXZ9) Putative DNA binding protein ACBF                                 |
| LjSGA_119934.1   | 89  | partial | (Q8W214) Single-stranded DNA binding protein precursor                     |
| LjSGA_119962.1   | 208 | partial | (Q4Q1R0) Universal minicircle sequence binding protein (UMSBP), putative   |
| LjSGA_120242.1   | 63  | partial | (Q9FX78) F19K19.6 protein                                                  |
| LjSGA_120858.1.1 | 37  | partial | (Q332W3) Photosystem II protein L (Fragment)                               |
| LjSGA_121266.1   | 76  | partial | (Q3ED88) Protein At1g20510                                                 |
| LjSGA_121474.1   | 97  | partial | (Q6VWJ5) Fructokinase 3                                                    |
| LjSGA_121507.0.1 | 56  | partial | (Q8L625) Hypothetical protein At1g73660                                    |

|                  |     |         |                                                                                                                                   |
|------------------|-----|---------|-----------------------------------------------------------------------------------------------------------------------------------|
| LjSGA_121531.1.1 | 32  | partial | (Q9SGR8) T23E18.8                                                                                                                 |
| LjSGA_121649.1   | 84  | partial | (Q9SYQ0) F9H16.15 protein                                                                                                         |
| LjSGA_121900.1   | 49  | partial | (Q9FEE2) Tonneau 2 (Hypothetical protein At5g18580)                                                                               |
| LjSGA_122090.1   | 70  | partial | (Q9LK22) GblAAF57656.1 (At3g27310) (Hypothetical protein At3g27310) (CDC48-interacting UBX-domain protein) (Hypothetical protein) |
| LjSGA_122223.1   | 30  | partial | (Q43611) Hypothetical protein (Fragment)                                                                                          |
| LjSGA_122339.1   | 43  | partial | (Q3E951) Protein At5g25560                                                                                                        |
| LjSGA_122466.1.1 | 163 | partial | (Q7XAC5) Embryo-specific urease (EC 3.5.1.5)                                                                                      |
| LjSGA_122686.1   | 64  | partial | (Q9SU03) Hydrolase-like protein                                                                                                   |
| LjSGA_122833.1   | 36  | partial | unknown protein                                                                                                                   |
| LjSGA_122875.1   | 127 | partial | (Q7S753) Hypothetical protein                                                                                                     |
| LjSGA_123575.1   | 64  | partial | (Q7X7E9) OSJNBa0035M09.8 protein                                                                                                  |
| LjSGA_123604.1   | 37  | partial | (Q332W3) Photosystem II protein L (Fragment)                                                                                      |
| LjSGA_123715.1   | 84  | partial | (Q45NP0) Methylesterase (Fragment)                                                                                                |
| LjSGA_123843.1   | 124 | partial | (Q9XIR3) F13O11.12 protein                                                                                                        |
| LjSGA_124169.1   | 99  | partial | (Q41695) Pectinacetylsterase precursor                                                                                            |
| LjSGA_124223.0.1 | 74  | partial | (Q9FKU9) Berberine bridge enzyme-like protein                                                                                     |
| LjSGA_124245.1   | 152 | partial | (Q6IWH2) Lipid transfer protein                                                                                                   |
| LjSGA_124586.1   | 40  | partial | (Q5UNS1) Arginase 2                                                                                                               |
| LjSGA_124834.1   | 77  | partial | (Q75WU3) Leucine-rich repeat receptor-like protein kinase 1                                                                       |
| LjSGA_124886.1   | 68  | partial | (Q8L8S5) Putative heat shock protein                                                                                              |
| LjSGA_124992.1   | 117 | partial | (Q9LE86) Arabidopsis thaliana genomic DNA, chromosome 3, P1 clone:MJM20 (MJM20.4 protein)                                         |
| LjSGA_125102.1   | 234 | partial | (Q8DQG9) RNA-binding protein                                                                                                      |
| LjSGA_125121.1   | 93  | partial | (Q9LTK3) Homeodomain transcription factor-like                                                                                    |

|                  |     |         |                                                                                      |
|------------------|-----|---------|--------------------------------------------------------------------------------------|
| LjSGA_125354.1.1 | 49  | partial | (Q2PMM9) NADH-plastoquinone oxidoreductase subunit 5                                 |
| LjSGA_125357.1   | 168 | partial | (Q6VG41) Gag protein                                                                 |
| LjSGA_125395.1   | 80  | partial | (Q67YE7) Protein-tyrosine-phosphatase-like protein                                   |
| LjSGA_125460.1   | 43  | partial | (Q7XAF0) Tocopherol cyclase                                                          |
| LjSGA_125516.1   | 44  | partial | (Q2HIG1) At3g17590                                                                   |
| LjSGA_126126.1   | 49  | partial | (Q541X2) Putative alpha subunit of F-actin capping protein                           |
| LjSGA_126143.1.1 | 91  | partial | (Q5RFI2) Hypothetical protein DKFZp469D0532                                          |
| LjSGA_126291.1   | 43  | partial | (Q2PMM9) NADH-plastoquinone oxidoreductase subunit 5                                 |
| LjSGA_126402.1   | 33  | partial | (Q5JN42) Phosphatidylserine decarboxylase-like                                       |
| LjSGA_126822.1   | 53  | partial | (Q9XEY7) Trehalase 1 GMTRE1                                                          |
| LjSGA_126977.1   | 46  | partial | (Q9FS08) UV-damaged DNA binding protein                                              |
| LjSGA_126992.1   | 77  | partial | (P93042) Root hair defective 3 (Hypothetical protein At3g13870)                      |
| LjSGA_127589.1   | 41  | partial | (O04539) F20P5.21 protein                                                            |
| LjSGA_128021.2   | 110 | partial | (Q9FF48) GblAAB97123.1                                                               |
| LjSGA_128169.1.1 | 57  | partial | (Q8GU88) PDR-like ABC transporter                                                    |
| LjSGA_128550.0.1 | 74  | partial | (Q9SJZ8) Putative non-LTR retroelement reverse transcriptase                         |
| LjSGA_128696.1   | 156 | partial | (Q9LEX1) CaLB protein (At3g61050)                                                    |
| LjSGA_128883.1   | 34  | partial | (Q9AST9) Hypothetical protein At1g73110/F3N23_39                                     |
| LjSGA_129152.1   | 53  | partial | (Q8RWU7) Putative membrane trafficking factor (CDC48-interacting UBX-domain protein) |
| LjSGA_129390.1   | 58  | partial | (Q9SXU6) Pyruvate kinase (Fragment)                                                  |
| LjSGA_129394.1   | 52  | partial | (O80564) Hypothetical protein At2g43940                                              |
| LjSGA_129402.1.1 | 50  | partial | (Q9LXT9) Callose synthase catalytic subunit-like protein                             |
| LjSGA_129492.1   | 80  | partial | (Q9SVK5) Putative mitochondrial protein                                              |
| LjSGA_129501.1   | 36  | partial | (Q4U3E9) Putative L24 ribosomal protein                                              |
| LjSGA_129556.1   | 135 | partial | (O96063) Myosin heavy chain (Fragment)                                               |

|                  |     |         |                                                                                                          |
|------------------|-----|---------|----------------------------------------------------------------------------------------------------------|
| LjSGA_129661.1   | 78  | partial | (O82343) Expressed protein (Hypothetical protein At2g46260)                                              |
| LjSGA_129887.1   | 138 | partial | (Q3L234) Zinc finger protein                                                                             |
| LjSGA_130110.1   | 67  | partial | (Q9M7P3) GTP-binding protein                                                                             |
| LjSGA_130169.1.1 | 83  | partial | (Q9LZS7) Hypothetical protein F17C15_30 (Putative lipase/acylhydrolase) (Hypothetical protein At5g03610) |
| LjSGA_130244.1.1 | 48  | partial | (Q9FJ30) Similarity to heat shock transcription factor HSF30                                             |
| LjSGA_130403.0.2 | 30  | partial | (Q9ZRH5) NADP-malic enzyme                                                                               |
| LjSGA_130664.1   | 46  | partial | (Q58FG4) Homogentisate phytylprenyltransferase                                                           |
| LjSGA_130728.1   | 61  | partial | unknown protein                                                                                          |
| LjSGA_130806.1   | 121 | partial | (Q2V4H0) Protein At1g53800                                                                               |
| LjSGA_130848.1   | 60  | partial | (Q9LQ19) F16P17.2 protein                                                                                |
| LjSGA_131100.1   | 62  | partial | (Q6V8R1) Putative GATA-type zinc finger protein (Fragment)                                               |
| LjSGA_131380.1   | 97  | partial | unknown protein                                                                                          |
| LjSGA_131627.1   | 108 | partial | (Q949L4) Putative polyprotein (Fragment)                                                                 |
| LjSGA_131903.1   | 58  | partial | (Q9SEX4) Ornithine carbamoyltransferase OOCT1 (EC 2.1.3.3)                                               |
| LjSGA_131922.1   | 208 | partial | (Q512P7) Hypothetical protein                                                                            |
| LjSGA_131991.0.1 | 46  | partial | (Q8GYG0) Hypothetical protein At5g08139/At5g08140 (Hypothetical protein At5g08139)                       |
| LjSGA_132006.1   | 67  | partial | (Q9SB69) Hypothetical protein F22K18.50 (Hypothetical protein AT4g24750)                                 |
| LjSGA_132088.0.1 | 31  | partial | (Q49KZ8) Photosystem I P700 apoprotein A1                                                                |
| LjSGA_132096.1   | 102 | partial | (Q8LPQ5) AT3g18290/MIE15_8                                                                               |
| LjSGA_132222.1   | 184 | partial | (Q4Q1R0) Universal minicircle sequence binding protein (UMSBP), putative                                 |
| LjSGA_132253.1   | 89  | partial | (Q84WW3) Hypothetical protein At5g15070                                                                  |
| LjSGA_132312.1   | 44  | partial | (Q851E2) Putative P-type ATPase                                                                          |
| LjSGA_132387.1   | 33  | partial | (Q9LFR8) TCP-1 chaperonin-like protein                                                                   |
| LjSGA_132576.0.1 | 46  | partial | (Q84P29) Seed calcium dependent protein kinase a                                                         |

|                  |     |         |                                                                                   |
|------------------|-----|---------|-----------------------------------------------------------------------------------|
| LjSGA_133188.1   | 75  | partial | (Q6NLQ0) At3g20475                                                                |
| LjSGA_133220.1   | 95  | partial | (Q8GZ49) Hypothetical protein At1g58190/T15M6_19 (Hypothetical protein At1g58190) |
| LjSGA_133295.1   | 91  | partial | (Q9LN45) F18O14.25                                                                |
| LjSGA_133315.1   | 34  | partial | (Q6L8U0) Auxin response factor 4                                                  |
| LjSGA_133441.0.1 | 69  | partial | (Q2PMR3) 50S ribosomal protein L33                                                |
| LjSGA_133460.1   | 95  | partial | unknown protein                                                                   |
| LjSGA_133505.1   | 80  | partial | (Q8LNH8) Glycine-rich protein, putative                                           |
| LjSGA_133629.1   | 37  | partial | (Q9FHR5) Similarity to COP1-interacting protein 7                                 |
| LjSGA_133694.1   | 123 | partial | (Q2QQS5) Cyclin, N-terminal domain, putative                                      |
| LjSGA_133709.1   | 38  | partial | (Q6ZIR2) DegP protease-like                                                       |
| LjSGA_133740.1.1 | 66  | partial | (Q9LN49) F18O14.21                                                                |
| LjSGA_133805.1   | 71  | partial | (Q84K72) Hypothetical protein At1g06510                                           |
| LjSGA_133806.1   | 71  | partial | (Q9LPZ4) T23J18.7 (Hypothetical protein At1g11400)                                |
| LjSGA_134343.1.1 | 54  | partial | (Q5N7S1) 24 kDa seed maturation protein-like                                      |
| LjSGA_134354.1   | 273 | partial | (Q7XP86) OSJNBa0021F22.14 protein                                                 |
| LjSGA_134392.2   | 71  | partial | (Q9FR42) Anther-specific myb-related protein 1                                    |
| LjSGA_134451.1   | 50  | partial | (Q6R3K8) Metal-nicotianamine transporter YSL4                                     |
| LjSGA_134614.1.1 | 65  | partial | (Q6Z0W7) Hypothetical protein OSJNBb0026D20.9                                     |
| LjSGA_134779.1   | 103 | partial | (O64815) Similar to hookless1 (HLS1)                                              |
| LjSGA_134987.1   | 107 | partial | (Q8W2C0) Functional candidate resistance protein KR1                              |
| LjSGA_135269.1   | 179 | partial | (Q8LP36) PICYC4 protein (Fragment)                                                |
| LjSGA_135452.1   | 48  | partial | (Q9SX86) F16N3.17 protein                                                         |
| LjSGA_135715.1   | 122 | partial | (Q8W553) AT5g35180/T25C13_60                                                      |
| LjSGA_136660.1   | 64  | partial | (Q9ARU3) Putative xylosyltransferase I                                            |
| LjSGA_136793.1   | 37  | partial | (Q9LKG4) Putative DNA binding protein                                             |

|                  |     |         |                                                                                      |
|------------------|-----|---------|--------------------------------------------------------------------------------------|
| LjSGA_136836.1   | 48  | partial | (Q8W040) Dihydrofolate synthetase /folylpolyglutamate synthetase                     |
| LjSGA_136899.1   | 51  | partial | (Q259X8) B0811B10.8 protein                                                          |
| LjSGA_136900.1   | 38  | partial | (Q6Z4T7) Hypothetical protein OSJNBa0054L03.38 (Hypothetical protein OJ1134_B10.7)   |
| LjSGA_137333.1.1 | 56  | partial | (Q9FHB6) Genomic DNA, chromosome 5, TAC clone:K24M7 (Hypothetical protein At5g52450) |
| LjSGA_137437.1   | 70  | partial | (O22733) F11P17.15 protein                                                           |
| LjSGA_137526.0.1 | 44  | partial | (Q3EAR7) Protein At3g42180                                                           |
| LjSGA_137600.1   | 55  | partial | (Q949L3) Putative polyprotein (Fragment)                                             |
| LjSGA_137731.1   | 195 | partial | (Q949L4) Putative polyprotein (Fragment)                                             |
| LjSGA_138013.1   | 46  | partial | (Q9LR06) F10A5.14                                                                    |
| LjSGA_138311.1   | 69  | partial | (Q9FN15) GblAAC18972.1 (Hypothetical protein At5g67370)                              |
| LjSGA_138441.1   | 39  | partial | (Q93ZN3) AT4g17070/dl4565c                                                           |
| LjSGA_138917.1   | 128 | partial | (Q9AXF3) Lipid transfer protein                                                      |
| LjSGA_139204.1   | 77  | partial | (Q9FRK9) Hypothetical protein F22H5.9 (Hypothetical protein At1g75180)               |
| LjSGA_139237.2   | 46  | partial | (Q8L845) Hypothetical protein At2g01220:At2g01230 (Hypothetical protein At2g01220)   |
| LjSGA_139526.1.1 | 23  | partial | (Q8GYJ1) Hypothetical protein                                                        |
| LjSGA_139590.1   | 44  | partial | (Q6ZIE6) Putative permease                                                           |
| LjSGA_139591.1.2 | 37  | partial | (Q332W3) Photosystem II protein L (Fragment)                                         |
| LjSGA_139607.1.1 | 29  | partial | (Q9FK38) DNA repair protein-like                                                     |
| LjSGA_139675.1   | 96  | partial | (Q9XGC0) Starch synthase isoform SS III (EC 2.4.1.21)                                |
| LjSGA_139711.1   | 144 | partial | (Q7S753) Hypothetical protein                                                        |
| LjSGA_139724.1   | 52  | partial | (O49896) Hypothetical protein                                                        |
| LjSGA_139826.1   | 43  | partial | (Q9LVD9) GblAAC28507.1 (At3g21690)                                                   |
| LjSGA_140053.0.1 | 49  | partial | (Q84R15) Hypothetical protein At2g07370 (Hypothetical protein At2g07360)             |
| LjSGA_140321.1   | 71  | partial | (Q71G33) COP8-like protein                                                           |
| LjSGA_140700.1   | 128 | partial | (Q8LEM2) Hypothetical protein                                                        |



|                  |     |         |                                                                                                                              |
|------------------|-----|---------|------------------------------------------------------------------------------------------------------------------------------|
| LjSGA_140758.1.1 | 118 | partial | (Q2HUK0) Cyclin-like F-box                                                                                                   |
| LjSGA_140767.0.1 | 55  | partial | unknown protein                                                                                                              |
| LjSGA_140894.2   | 46  | partial | (Q7PSE2) ENSANGP00000015076                                                                                                  |
| LjSGA_140961.1   | 73  | partial | (O65519) Hypothetical protein F23E13.170 (Hypothetical protein AT4g36280)                                                    |
| LjSGA_141113.1   | 73  | partial | (O65519) Hypothetical protein F23E13.170 (Hypothetical protein AT4g36280)                                                    |
| LjSGA_141248.1   | 68  | partial | (Q24BQ3) Zinc knuckle family protein                                                                                         |
| LjSGA_141276.1   | 51  | partial | (Q8H1E6) Putative growth regulator                                                                                           |
| LjSGA_141425.0.1 | 44  | partial | (Q56SE1) Methyl jasmonate esterase                                                                                           |
| LjSGA_141855.1   | 42  | partial | (Q9XFE8) Chloroplast envelope calcium ATPase (Fragment)                                                                      |
| LjSGA_141883.1   | 106 | partial | (Q91594) Cellular nucleic acid binding protein                                                                               |
| LjSGA_141893.0.1 | 37  | partial | (Q2VWB7) Prf interactor 30137                                                                                                |
| LjSGA_142272.1   | 38  | partial | (Q2PMN3) Photosystem I subunit VII                                                                                           |
| LjSGA_142772.2   | 115 | partial | (Q2PF19) Cytochrome P450                                                                                                     |
| LjSGA_143243.1   | 62  | partial | (Q9ASU6) At1g42440/F7F22_7 (Hypothetical protein At1g42440)                                                                  |
| LjSGA_143331.1   | 59  | partial | (Q9FFU2) Genomic DNA, chromosome 5, P1 clone:MBG8 (AT5g54880/MBG8_15)                                                        |
| LjSGA_143408.1   | 64  | partial | (Q75LC8) Putative exoribonuclease                                                                                            |
| LjSGA_143464.1   | 48  | partial | (Q941I6) DNA mismatch repair protein                                                                                         |
| LjSGA_143513.1   | 46  | partial | (Q8LBE2) Hypothetical protein                                                                                                |
| LjSGA_143582.1   | 45  | partial | (Q8VZB8) Hypothetical protein At5g55810; MDF20.25 (Hypothetical protein At5g55810)                                           |
| LjSGA_143738.1   | 39  | partial | (Q9S834) ATP-dependent Clp protease subunit ClpP (At1g02560) (ATP-dependent Clp protease proteolytic subunit ClpP5) (NClpP1) |
| LjSGA_143950.1   | 37  | partial | (Q940D1) At1g64110/F22C12_22                                                                                                 |
| LjSGA_144105.1   | 51  | partial | (Q9LHE9) Putative myosin                                                                                                     |
| LjSGA_144139.1.1 | 47  | partial | (Q7A559) Pyruvate kinase                                                                                                     |
| LjSGA_144154.2   | 45  | partial | (Q8S8Z6) Syringolide-induced protein 13-1-1                                                                                  |

|                  |     |         |                                                                                   |
|------------------|-----|---------|-----------------------------------------------------------------------------------|
| LjSGA_144259.1   | 66  | partial | (Q9SV17) Hypothetical protein F3L17.100 (Hypothetical protein AT4g31530)          |
| LjSGA_144769.1   | 47  | partial | (Q3ECD7) Protein At1g72550                                                        |
| LjSGA_144821.1   | 44  | partial | (Q53JD1) ATPase, calcium-transporting-related (Fragment)                          |
| LjSGA_144865.1   | 41  | partial | (Q5IRX9) ARF6                                                                     |
| LjSGA_144922.1   | 47  | partial | (Q93X14) Amino acid permease AAP3                                                 |
| LjSGA_145042.1   | 44  | partial | (Q9FVE9) Cytosolic aconitase                                                      |
| LjSGA_145133.1   | 78  | partial | (Q39873) Lea protein precursor                                                    |
| LjSGA_145144.0.1 | 47  | partial | (Q2V341) Protein At5g27640                                                        |
| LjSGA_145237.1   | 59  | partial | (Q9SY90) T25B24.5 protein                                                         |
| LjSGA_145263.1   | 53  | partial | (Q8RY18) AT5g43560/K9D7_6                                                         |
| LjSGA_145265.1   | 220 | partial | (O82388) Expressed protein (Hypothetical protein At2g29670) (At2g29670/T27A16.23) |
| LjSGA_145530.1   | 89  | partial | (Q9M1V9) Hypothetical protein F16M2_160 (At3g63310)                               |
| LjSGA_145568.1   | 37  | partial | (Q2QQX3) Expressed protein                                                        |
| LjSGA_145689.1   | 46  | partial | (Q9ZQF1) Putative salt-inducible protein                                          |
| LjSGA_145848.1   | 44  | partial | (Q53M53) Hemolysin A, putative                                                    |
| LjSGA_145871.1   | 98  | partial | (Q9FSX3) Hypothetical protein ORF1                                                |
| LjSGA_145902.1.1 | 84  | partial | (Q506K3) Squalene monooxygenase                                                   |
| LjSGA_146013.2   | 55  | partial | (Q84P29) Seed calcium dependent protein kinase a                                  |
| LjSGA_146047.1   | 34  | partial | (Q9SV17) Hypothetical protein F3L17.100 (Hypothetical protein AT4g31530)          |
| LjSGA_146164.1.1 | 42  | partial | (Q66WR9) Sterol delta-7 reductase (Fragment)                                      |
| LjSGA_146350.1   | 76  | partial | (Q5K4L5) Villin 1 (Fragment)                                                      |
| LjSGA_146469.1   | 35  | partial | (Q84N48) CRS2-associated factor 2                                                 |
| LjSGA_146478.1   | 116 | partial | (Q9LMJ1) F10K1.31 protein                                                         |
| LjSGA_146485.1   | 58  | partial | (Q9M3Y4) Germin-like protein                                                      |
| LjSGA_146629.1   | 62  | partial | (Q6Z0P5) Putative sexual differentiation process protein isp4                     |

|                  |     |         |                                                                                                     |
|------------------|-----|---------|-----------------------------------------------------------------------------------------------------|
| LjSGA_146823.1   | 31  | partial | (Q9XEI3) Beta-D-glucan exohydrolase isoenzyme ExoI                                                  |
| LjSGA_147112.1   | 28  | partial | (Q49KT6) Hypothetical chloroplast RF2                                                               |
| LjSGA_147322.1   | 44  | partial | unknown protein                                                                                     |
| LjSGA_147477.1.1 | 58  | partial | (Q547H2) ARL2 G-protein                                                                             |
| LjSGA_147531.1   | 143 | partial | (O04180) Pge1 protein                                                                               |
| LjSGA_147738.1   | 38  | partial | (Q6H6L9) Root-specific protein RCc3                                                                 |
| LjSGA_147748.1   | 135 | partial | (Q8S9H4) Ethylene response factor 1                                                                 |
| LjSGA_147920.1   | 57  | partial | (Q8W0S8) Hypothetical protein                                                                       |
| LjSGA_147935.1   | 91  | partial | (Q9SFE4) T26F17.14 (At1g21910) (TINY like protein)                                                  |
| LjSGA_147985.1   | 36  | partial | (Q9FJK3) Similarity to MADS-box DNA-binding protein (MADS-box family protein)                       |
| LjSGA_148098.0.1 | 36  | partial | (Q517K6) Ribosomal protein L7                                                                       |
| LjSGA_148099.1   | 41  | partial | (Q2NVN7) Enolase (EC 4.2.1.11) (2-phospho-D-glycerate hydro-lyase)                                  |
| LjSGA_148154.1   | 199 | partial | (Q9LP76) T1N15.10                                                                                   |
| LjSGA_148425.1   | 36  | partial | (Q6Z3T8) Auxin-regulated protein-like                                                               |
| LjSGA_148487.1   | 41  | partial | (Q8H925) WD domain containing protein, putative                                                     |
| LjSGA_148519.1   | 36  | partial | (Q9FLK9) Leucine-rich repeat disease resistance protein-like (Cf-5 disease resistance protein-like) |
| LjSGA_148703.1   | 164 | partial | (Q98D39) Myo-inositol-1-monophosphotase                                                             |
| LjSGA_148720.1   | 167 | partial | (Q6XGD7) VC0178-like protein                                                                        |
| LjSGA_148942.1.1 | 53  | partial | (Q9FN21) Similarity to unknown protein                                                              |
| LjSGA_149056.1   | 55  | partial | unknown protein                                                                                     |
| LjSGA_149392.1   | 45  | partial | (Q9LNT7) T20H2.10 protein                                                                           |
| LjSGA_149766.1   | 65  | partial | (Q9FJS0) Arabidopsis thaliana genomic DNA, chromosome 5, P1 clone:MQD22                             |
| LjSGA_150180.1   | 54  | partial | (Q9M390) Peptide transport-like protein                                                             |
| LjSGA_150256.1   | 59  | partial | (Q651X6) Putative cellulose synthase-like protein OsCs1E1                                           |
| LjSGA_150405.1.1 | 48  | partial | (Q9LQU6) F10B6.25                                                                                   |

|                |    |         |                 |
|----------------|----|---------|-----------------|
| LjSGA_150780.1 | 51 | partial | unknown protein |
| LjSGA_150782.2 | 63 | partial | (Q9SML5) Knolle |

**Supplemental Table16.** Tandem gene duplications in the *L. japonicus* HGS.

|                                                         | chr1        | chr2        | chr3        | chr4        | chr5        | chr6       | unmapped    | total        |
|---------------------------------------------------------|-------------|-------------|-------------|-------------|-------------|------------|-------------|--------------|
| <b>Number of predicted genes in HGS</b>                 | <b>2376</b> | <b>1880</b> | <b>1680</b> | <b>1726</b> | <b>1464</b> | <b>783</b> | <b>1471</b> | <b>11380</b> |
| <b>Number of tandem duplicated genes</b>                | <b>127</b>  | <b>123</b>  | <b>164</b>  | <b>117</b>  | <b>87</b>   | <b>62</b>  | <b>90</b>   | <b>770</b>   |
| Number of groups                                        | 46          | 52          | 68          | 47          | 36          | 24         | 37          | 310          |
| Maximum copy numebr in a group                          | 7           | 6           | 5           | 6           | 6           | 8          | 5           |              |
| <b>Number of genes with homologs within 100kb range</b> | 177         | 180         | 213         | 166         | 114         | 107        | 110         | 1067         |
